# Supplementary material for: Synthesis of dimeric indoles from Friedel–Crafts reaction of indoles with ketones catalysed by a Brønsted acid ionic liquid and their interactions with BSA and DNA
Source: Royal Society of Chemistry journal article supplement (doi:10.1039/d4nj02651a), 2024-01-01
Supplement: d4nj02651a1.pdf [file d4nj02651a1.pdf]

## Synthesis of Dimeric Indoles from Friedel–Crafts Reaction of Indoles with Ketones Catalysed by a Bronsted Acid Ionic Liquid and Their Interactions with BSA and DNA

Sai Deepak Pasuparth, Pranati Somkuwar, Venkatesan Kali, Prof. S.K. Ashok Kumar, and Prof. Dr. Barnali Maiti\*

Department of Chemistry, School of Advanced Sciences, Vellore Institute of Technology, Vellore-632014, India.

\*Corresponding author

E-mail: [barnalimaiti.m@gmail.com](mailto:barnalimaiti.m@gmail.com); [barnali.m@vit.ac.in](mailto:barnali.m@vit.ac.in)

### Table of Contents

| S. No | Caption                                                                                                                                                     | No.          | Page No.    |
|-------|-------------------------------------------------------------------------------------------------------------------------------------------------------------|--------------|-------------|
| 1     | Experimental Section                                                                                                                                        |              | SI3-SI7     |
| 2     | Spectral characterization data                                                                                                                              |              | SI8-SI17    |
| 3     | <sup>1</sup> H NMR (400MHz), <sup>13</sup> C NMR (100MHz) spectra of <b>4</b> in D <sub>2</sub> O                                                           | Fig. S1-S2   | SI18        |
| 4     | DEPT-135 spectrum of <b>4</b> in D <sub>2</sub> O and FT-IR spectrum of <b>4</b>                                                                            | Fig. S3-S4   | SI19        |
| 5     | <sup>1</sup> H NMR (400MHz), <sup>13</sup> C NMR (100MHz) in DMSO-d <sub>6</sub> or CDCl <sub>3</sub> , FT-IR and HRMS spectra of the synthesized compounds | Fig. S5-S161 | SI20-SI88   |
| 6     | Crystal Structure Report for <b>7gj</b>                                                                                                                     |              | SI89        |
| 7     | Single Crystal data and structure refinement for <b>7gj</b>                                                                                                 | Table S1     | SI90-SI101  |
| 8     | Interactions of Hirshfeld Surface in percentages for <b>7gj</b>                                                                                             | Table S2     | SI102-SI103 |

|    |                                                                                                                                                                          |                  |                    |
|----|--------------------------------------------------------------------------------------------------------------------------------------------------------------------------|------------------|--------------------|
| 9  | The charge densities in HOMO and LUMO and electrostatic potential energy surface of the synthesized derivatives <b>7</b> and <b>10</b>                                   | <b>Table S3</b>  | <b>SI104-SI109</b> |
| 10 | Frontier molecular orbitals of HOMO and LUMO of all the synthesized derivatives <b>7</b> and <b>10</b> using B3LYP/6-31G (d,p) in gas phase                              | <b>Table S4</b>  | <b>SI110-SI118</b> |
| 11 | Theoretical UV-Visible Characteristics of synthesized derivatives                                                                                                        | <b>Table S5</b>  | <b>SI119-SI120</b> |
| 12 | Binding affinity of BSA-ligand <b>7</b> calculated from Molecular docking studies (kcal mol <sup>-1</sup> ) using AutoDock Vina                                          | <b>Table S6</b>  | <b>SI121</b>       |
| 13 | Binding affinity of DNA with ligand <b>7</b> calculated from Molecular docking studies (kcal mol <sup>-1</sup> ) using AutoDock Vina                                     | <b>Table S7</b>  | <b>SI121</b>       |
| 14 | The binding site residues of BSA with derivatives <b>7</b> as determined from Autodock Vina                                                                              | <b>Table S8</b>  | <b>SI122-SI123</b> |
| 15 | The interacting nucleobases of DNA with derivatives <b>7</b> as determined from Autodock Vina                                                                            | <b>Table S9</b>  | <b>SI124-SI125</b> |
| 16 | Cartesian Coordinates of the optimized structures obtained at B3LYP 631-G (d,p) level of theory                                                                          | <b>Table S10</b> | <b>SI126-SI154</b> |
| 17 | Z matrix of the optimized structures obtained at B3LYP 631-G (d,p) level of theory                                                                                       | <b>Table S11</b> | <b>SI155-SI160</b> |
| 18 | Plot of I <sub>0</sub> /I vs. concentrations of compounds; Scatchard plot of log ([I <sub>0</sub> -I]/I) vs. log [compound] for BSA in the presence of selected ligands. | <b>Fig. S119</b> | <b>SI161</b>       |

## Experimental Section

### Materials and Methods

Indole, substituted indoles, isatin, substituted isatins, Acenaphthoquinone, Phenanthrenequinone, cyclohexanone, dibromo alkanes, imidazole, and 2-chloro acetic acid, were acquired from Sigma-Aldrich, and all organic solvents were developed from commercial suppliers and used without any further purification. Analytical thin-layer chromatography (TLC) was performed using 0.25-mm silica gel-coated Kieselgel 60 F254 plates.  $^1\text{H}$  NMR (400 MHz) and  $^{13}\text{C}$  NMR (100 MHz) spectra were recorded on a Bruker AVANCE III 400 MHz spectrometer. Chemical shifts and coupling constants are stated in parts per million (ppm) and Hertz (Hz) respectively using tetra-methyl silane (TMS) as an internal standard and the solvent resonance at (DMSO- $d_6$ :  $^1\text{H}$  NMR 400 MHz and  $^{13}\text{C}$  NMR 100 MHz):  $\delta$  2.49 and 39.7 ppm; The peak multiplicities are denoted as s (singlet), d (doublet), dd (doublet of doublet), m (multiplet), dt (doublet of triplet), and t (triplet). The FT-IR spectra were recorded utilising the Perkin-Elmer RX-I FTIR spectrometer in ATR mode. The UV-Vis absorption spectra were acquired using the JASCO V-670 spectrophotometer, operating at room temperature, with the solvent being DMSO and acetonitrile. JASCO fluorescence spectrophotometer (FP8200) equipped with a xenon and helium lamp using 1 cm quartz cell was utilized to measure emission fluorescence spectra by excitation at their respective absorption maxima.

General Procedure for the Synthesis of *1,3-bis(carboxymethyl)imidazolium chloride* [BCMIM][Cl] ionic liquid **4**.<sup>1,2</sup>

1 equivalent (5.0 g) of imidazole **1** was reacted with 2 equivalents (13.9 g) of chloroacetic acid **2** in the presence of 1.2 equivalents (3.6 g) of NaOH in acetonitrile under reflux conditions for a duration of 18 hours, resulting in the formation of **3**. Subsequently, the crude ionic liquid **3** was subjected to a reaction with cold concentrated hydrochloric acid at ambient temperature for a period of 24 h. The precipitate obtained was filtered and subjected to thorough washing using acetonitrile (3 X 30 mL). The concentration of the cumulative filtrates, followed by dichloromethane and ether wash yielded the desired 1,3-bis(carboxymethyl)imidazolium chloride [BCMIM][Cl] ionic liquid **4** as white solid with 95% yield (14.9 g). The formed product was further characterized by  $^1\text{H}$ ,  $^{13}\text{C}$  NMR and FT-IR spectral techniques.

Representative General Procedure for the Synthesis of *1H,1''H-[3,3':3',3''-terindol]-2'(1'H)-one 7aa*.

To a dried 25-mL round bottom flask, indole **5a** (0.24 g, 2 equiv, 2.04 mmol), isatin **6a** (0.15 g, 1 equiv, 1.02 mmol), and 4 mol% of [BCMIM][Cl] ionic liquid **4** were sequentially added to 5 mL of aqueous ethanol (1:1 v/v) and stirred at 80 °C under reflux conditions for 30 min. The progress of reaction was scrutinized by TLC. After, the completion of the reaction the resultant solid precipitate was filtered out and then washed with ether (10 mL X 2) and hexane without any additional column chromatography to obtain the desired product **7aa** in 95% yield (0.35 g). The furnished products were subjected to characterization using <sup>1</sup>H NMR, <sup>13</sup>C NMR, FT-IR and HRMS spectra techniques and were found to be similar to those reported in the literature.

Representative General Procedure for the Synthesis of *1',1''''-(propane-1,3-diyl)bis([3,3':3',3''-terindolin]-2'-one) 10aa*.

To a dried 25-mL round bottom flask, indole **5a** (0.21 g, 4 equiv, 1.79 mmol), bis-isatin **9a** (0.15 g, 1 equiv, 0.45 mmol), and 4 mol% of [BCMIM][Cl] ionic liquid **4** were sequentially added to 5 mL of aqueous ethanol (1:1 v/v) and stirred at 80 °C under reflux conditions for 1.5 h. The progress of reaction was scrutinized by TLC. After, the completion of the reaction the resultant solid precipitate was filtered out and then washed with ether (10 mL X 2) and hexane without any additional column chromatography to obtain the desired product **10aa** in 94% yield (0.32 g). The furnished products were subjected to characterization using <sup>1</sup>H NMR, <sup>13</sup>C NMR, FT-IR and HRMS spectra techniques.

## General information

### UV-Vis and FL studies

The molar extinction coefficient ( $\epsilon$ ) was estimated using Beer-Lambert's law using equation 1.

$$A = \epsilon cl \quad \text{..... (eqn. i)}$$

where, A - absorbance,  $\epsilon$  - molar adsorption coefficient, c - concentration of the sample, and l - distance travelled by the light through the sample.

The Stoke's Shift was determined using the following equation (ii):

$$\Delta\bar{\nu} = 10^7 / \lambda_{\text{max(adsorption)}} - 10^7 / \lambda_{\text{max(emission)}} \quad \text{..... (eqn. ii)}$$

### Computational details

Calculations employing density functional theory (DFT) were executed to gain insight into both the structural and functional characteristics. The computations were carried out using Gaussian 16W software, employing the density functional theory (DFT) methodology.<sup>3</sup> The configurations of compounds in the gaseous phase were refined utilizing Becke's three-parameter and Lee–Yang–Parr functional (B3LYP).<sup>4</sup> Throughout all computations, the B3LYP functional was coupled with the 6-31G (d, p) basis set.<sup>5</sup> TD-DFT single-point calculations were performed at the B3LYP/6-31G (d, p) level of theory on the optimized configurations in the gaseous phase. The molecular visualization tool Gauss View 6.1 facilitated the determination of electronic structures and frontier molecular orbital architectures.<sup>6</sup>

### Molecular docking studies with protein BSA

To investigate binding interactions and affinities, the 3D structures of the produced derivatives 7 were docked with the BSA protein target. This study made use of MGL TOOL 1.5.7 and the AutoDock Vina algorithm (ADT).<sup>7</sup> The crystal structure of BSA (PDB ID 4F5S) was acquired from the Protein Data Bank ([www.rcsb.org/pdb](http://www.rcsb.org/pdb)).<sup>8,9</sup> After obtaining the protein, Gasteiger charges and polar hydrogens were included, while water molecules were removed to avoid unwanted interactions. In addition, we performed optimization of rotatable bonds. The ligands, which were optimized using Gaussian 6.1, were saved in PDB format. AutoDock Tools were subsequently utilized to create distinct files for the protein and ligands. A binding site was delineated by constructing a grid box around the active residue sites of the protein, with a spacing of 0.375 Å. The grid dimensions were set to 80 × 80 × 80 points, with coordinates established at 72.821, 26.360, and 91.719 Å in the X, Y, and Z directions, respectively. The files were converted to pdbqt format in the last stage. By employing an exhaustiveness value of eight, AutoDock produced a total of nine significant conformers for each ligand and protein separately. The orientation of each conformer was evaluated using PyMOL, a molecular graphics application (The PyMOL Molecular Graphics System, Version 2.0, Schrödinger, LLC). The most favorable binding configuration was selected for each docking situation, based on the docked conformation with the lowest energy as calculated by the AutoDock scoring technique. In addition, BIOVIA DSV was used to improve the imaging of the docked ligand complexes for the investigation of numerous molecular interactions.<sup>10</sup>

### Molecular docking studies with DNA

The binding affinities of the synthesized derivatives **7** for DNA were predicted by performing molecular docking using AUTODOCK 4.2 and MGL TOOL 1.5.7. The DNA structure with the PDB id 1BNA was obtained from the Protein Data Bank ([www.rcsb.org/pdb](http://www.rcsb.org/pdb)) at a resolution of 1.60 Å.<sup>11</sup> The water molecules were removed and Gasteiger charges were incorporated. The synthesized derivatives **7** were generated using ChemDraw 21.0.0 and then converted to PDB format using openbabel. Later, the target (DNA) and ligands were created using AutoDock Tools to generate the necessary files. Subsequently, the ligands were positioned into the DNA constructs using certain grid parameters located at their centers. A total of fifty orientations were produced for each ligand. The results, which include the surface analyses of the graphical representations, are displayed using PyMOL (PyMOL Molecular Graphics System, Version 1.3, Schrodinger, LLC). The binding mode chosen for each docking scenario was the docked conformation with the lowest energy, as determined by the Autodock scoring system.

### Protein binding studies

Most proteins found in blood plasma are serum albumin proteins, which play a critical role in the transportation and metabolism of drugs. The ligands' interactions with BSA were investigated by intrinsic tryptophan emission quenching assays. The emission intensity of BSA at a wavelength of 342 nm drops gradually as the concentration of ligands increases, providing evidence that the ligands are interacting with BSA. The ligand solutions were gradually introduced into a solution of BSA (2 µM) in a 5 mM Tris-HCl/NaCl buffer (pH 7.2). The reduction in the emission signals at 342 nm ( $\lambda_{ex} = 295$  nm) was then measured. The quenching constant ( $K_{BSA}$ ) was determined by applying the Stern-Volmer equation. The Stern-Volmer plots were constructed by plotting the ratio of  $I_0/I$  against the concentration of the ligand. The corrected fluorescence data was used, considering the impact of dilution. The data were linearly fitted using equation (iii):

$$I_0/I = 1 + K_{BSA}[Q] = 1 + K_q\tau_0[Q] \quad \text{.....eqn (iii)}$$

where,  $I_0$  and  $I$  - emission intensities of BSA in absence and presence of quencher with concentration  $[Q]$ , respectively,

$K_q$  - quenching rate constant, and

$\tau_0$  - average lifetime of tryptophan in BSA without quencher (reported as  $1 \times 10^{-8}$  s). The quenching constant ( $K_{BSA}$ ) was deduced using Origin Pro 2022 software.

For static quenching interactions, the binding constant ( $K$ ) and the number of binding sites ( $n$ ) was determined using

the Scatchard equation (iv):<sup>7</sup>

$$\log \frac{I_0 - I}{I} = \log k + n \log [Q] \quad \text{..... eqn (iv)}$$

### DNA binding studies

The DNA binding assay was performed by using UV-vis spectroscopy with ligands **7af**, **7ai**, **7aj**, and **7ak**, at concentration  $4 \times 10^{-5}$  M in Tris-HCl buffer (pH 7.2).<sup>12</sup> DNA solution with concentration  $2.87 \times 10^{-4}$  M was prepared. Later, the absorption was recorded by an incremental addition of DNA (20-100  $\mu$ M) to each ligand. The intrinsic DNA binding constant ( $K_b$ ) was determined using the equation eq.(v)

$$\frac{[DNA]}{\epsilon_a - \epsilon_f} = \frac{[DNA]}{\epsilon_b - \epsilon_f} + \frac{[DNA]}{K_b (\epsilon_a - \epsilon_f)} \quad \text{..... eqn (v)}$$

Where, [DNA] - concentration of DNA in the base pairs,  $\epsilon_a$  - apparent extinction coefficient observed for the ligand,  $\epsilon_b$  - extinction coefficient of the ligand when fully bound to DNA,  $\epsilon_f$  is the extinction of the ligand in its free form. The liner plot data  $[DNA]/(\epsilon_a - \epsilon_f)$  vs. [DNA] was obtained using Origin Lab version 8.5. The intrinsic binding constant ( $K_b$ ) value is the ratio of slope to the intercept of the linear fit.

### Ethidium bromide displacement assay

The EtBr displacement experiments were conducted to elucidate the binding mechanism between each ligand and DNA.<sup>13</sup> The incorporation of EtBr into DNA results in a strong fluorescence emission because of the generation of EtBr-DNA complex. When the ligand molecule inserts itself between the base pairs of DNA, the amount of binding locations on DNA that are accessible to EtBr reduces, leading to a decrease in the fluorescence intensity. The value of  $K_{sv}$  (Stern-Volmer quenching constant) was calculated from the following eq. (vi):

$$I_0/I = 1 + K_{sv}[Q] \quad \text{..... eqn (vi)}$$

where,  $I_0$  and  $I$  - emission intensities of EtBr-DNA in absence and presence of ligand with concentration [Q], respectively.

## Spectral characterization data

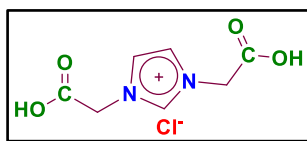

1,3-bis(carboxymethyl)imidazolium chloride [BCMIM][Cl] **4**.<sup>1,2</sup>

White solid; Yield: 95% (14.9011g); mp (°C): 225-227 [226-228];<sup>1,2</sup>

FT-IR (ATR mode, cm<sup>-1</sup>): 2869, 1730, 1564, 1403, 1171, 753, 652.

<sup>1</sup>H NMR (400 MHz, D<sub>2</sub>O, ppm) δ 8.93 (s, 1H), 7.56 (d, *J* = 1.4 Hz, 2H), 5.14 (s, 4H). <sup>13</sup>C NMR (100 MHz, D<sub>2</sub>O, ppm) δ 169.97, 138.21, 123.55, 50.36. DEPT-135 NMR (100 MHz, D<sub>2</sub>O, ppm) δ 138.2, 123.5, 50.4;

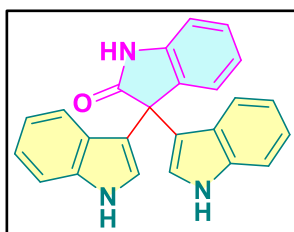

1H,1''H-[3,3':3',3''-terindol]-2'(1'H)-one 7aa. Beige-cream solid;

Yield: 95%; mp (°C): >300 [312];<sup>14,15</sup> FT-IR (ATR, cm<sup>-1</sup>): 3381,

3312, 1705, 1614, 1467, 1247, 1173, 738, 608, 553; <sup>1</sup>H NMR (400 MHz, DMSO-d<sub>6</sub>, ppm) δ 10.86 (s, 2H), 10.50 (s, 1H), 7.28 (d, *J* =

8.1 Hz, 2H), 7.16 (d, *J* = 7.8 Hz, 4H), 6.96 – 6.91 (m, 3H), 6.85 (t, *J*

= 7.5 Hz, 1H), 6.78 (s, 2H), 6.72 (t, *J* = 7.5 Hz, 2H). <sup>13</sup>C NMR (100 MHz, DMSO-d<sub>6</sub>, ppm) δ 179.2, 141.8, 137.4, 135.1, 128.3, 126.18, 125.4, 124.7, 121.9, 121.4, 121.2, 118.7, 114.8, 112.1, 110.0, 53.0.

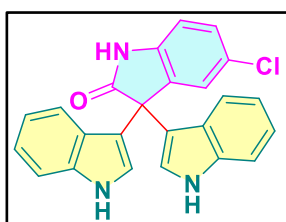

5'-chloro-1H,1''H-[3,3':3',3''-terindol]-2'(1'H)-one 7ab. Peachy-pink

solid; Yield: 94%; mp (°C): 293-295 [294-296];<sup>16</sup> FT-IR (ATR,

cm<sup>-1</sup>): 3347, 1700, 1476, 1171, 1104, 734, 642, 550, 491, 426; <sup>1</sup>H

NMR (400 MHz, DMSO-d<sub>6</sub>, ppm) δ 10.99 (s, 1H), 8.36 (d, *J* = 8.1

Hz, 1H), 8.02 – 7.99 (m, 2H), 7.90 (t, *J* = 7.5 Hz, 1H), 7.70 (t, *J* = 7.6

Hz, 1H), 7.55 (d, *J* = 6.9 Hz, 1H), 7.35 (d, *J* = 8.1 Hz, 2H), 7.02 – 6.98 (m, 4H), 6.85 (d, *J* = 2.0 Hz, 2H), 6.74 (t, *J* = 7.5 Hz, 2H). <sup>13</sup>C NMR (100 MHz, DMSO-d<sub>6</sub>, ppm) δ 203.1, 144.3, 140.1, 137.4, 132.5, 131.9, 130.9, 129.5, 129.3, 126.2, 125.1, 124.6, 122.7, 122.2, 121.3, 121.1, 118.8, 115.3, 114.9, 112.1, 58.1.

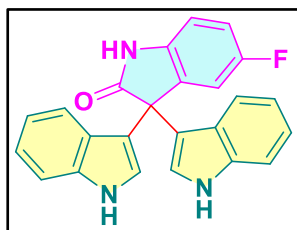

5'-fluoro-1H,1''H-[3,3':3',3''-terindol]-2'(1'H)-one 7ac. Off-white

solid; Yield: 95%; mp (°C): 291-293 [289-290];<sup>17</sup> FT-IR (ATR,

cm<sup>-1</sup>): 3436, 3387, 3315, 1695, 1480, 1173, 734, 677, 575, 505,

428; <sup>1</sup>H NMR (400 MHz, DMSO-d<sub>6</sub>, ppm) δ 11.01 (d, *J* = 1.5 Hz,

2H), 10.64 (s, 1H), 7.37 (d, *J* = 8.1 Hz, 2H), 7.22 (d, *J* = 8.0 Hz, 2H),

7.11 – 6.97 (m, 6H), 6.90 (d, *J* = 2.4 Hz, 2H), 6.82 (t, *J* = 7.4 Hz, 2H). <sup>13</sup>C NMR (100 MHz, DMSO-d<sub>6</sub>, ppm) δ 179.1, 158.3 (d, *J*<sub>C-F</sub> = 231.6 Hz, *ipso*-C), 138.0, 137.4, 136.8 (d, *J*<sub>C-F</sub> = 8.3

Hz), 126.0, 124.9, 121.5, 121.1, 118.8, 114.7 (d,  $J_{C-F} = 23.7$  Hz), 114.1, 112.9 (d,  $J_{C-F} = 24.7$  Hz), 112.1, 110.8 (d,  $J_{C-F} = 7.9$  Hz), 53.6.

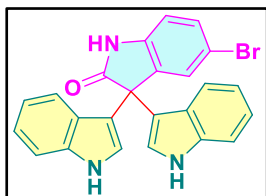

5'-bromo-1H,1''H-[3,3':3',3''-terindol]-2'(1'H)-one 7ad. Beige-cream solid; Yield: 93%; mp (°C): >300 [310-312];<sup>14</sup> FT-IR (ATR,  $\text{cm}^{-1}$ ): 3353, 1690, 1472, 1104, 814, 737, 637, 547, 491, 427;  $^1\text{H}$  NMR (400 MHz, DMSO- $d_6$ , ppm)  $\delta$  11.03 (d,  $J = 1.7$  Hz, 2H), 10.77 (s, 1H), 7.44 – 7.42 (m, 1H), 7.38 (d,  $J = 8.1$  Hz, 2H), 7.31 (d,  $J = 1.8$  Hz, 1H), 7.21 (d,  $J = 8.0$  Hz, 2H), 7.04 (t,  $J = 7.3$  Hz, 2H), 6.98 (d,  $J = 8.3$  Hz, 1H), 6.90 (d,  $J = 2.5$  Hz, 2H), 6.83 (t,  $J = 7.5$  Hz, 2H).  $^{13}\text{C}$  NMR (100 MHz, DMSO- $d_6$ , ppm)  $\delta$  178.7, 141.2, 137.5, 137.4, 131.2, 127.8, 125.9, 124.9, 121.6, 120.9, 118.9, 113.9, 113.6, 112.2, 112.2, 53.3.

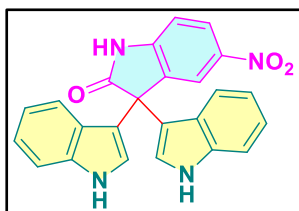

5'-nitro-1H,1''H-[3,3':3',3''-terindol]-2'(1'H)-one 7ae. Coral-red solid; Yield: 94%; mp (°C): >300 [293-295];<sup>18</sup> FT-IR (ATR,  $\text{cm}^{-1}$ ): 3382, 1706, 1619, 1533, 1340, 1090, 832, 744, 546;  $^1\text{H}$  NMR (400 MHz, DMSO- $d_6$ , ppm)  $\delta$  11.34 (s, 1H), 11.10 (s, 2H), 8.25 (dd,  $J = 8.6, 2.2$  Hz, 1H), 7.98 (d,  $J = 2.1$  Hz, 1H), 7.39 (d,  $J = 8.1$  Hz, 2H), 7.24 – 7.20 (m, 3H), 7.05 (t,  $J = 7.5$  Hz, 2H), 6.97 (d,  $J = 2.2$  Hz, 2H), 6.84 (t,  $J = 7.5$  Hz, 2H).  $^{13}\text{C}$  NMR (100 MHz, DMSO- $d_6$ , ppm)  $\delta$  179.4, 148.3, 142.7, 137.5, 135.7, 125.9, 125.9, 125.1, 121.7, 120.8, 120.6, 119.0, 113.3, 112.3, 110.4, 53.0.

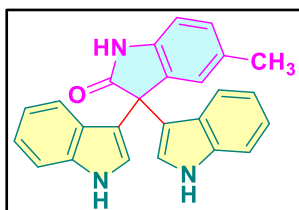

5'-methyl-1H,1''H-[3,3':3',3''-terindol]-2'(1'H)-one 7af. Apricot-pink solid; Yield: 93%; mp (°C): >300 [321-322];<sup>19</sup> FT-IR (ATR,  $\text{cm}^{-1}$ ): 3377, 3317, 1704, 1488, 1191, 1101, 737, 574, 425;  $^1\text{H}$  NMR (400 MHz, DMSO- $d_6$ , ppm)  $\delta$  10.94 (d,  $J = 1.8$  Hz, 2H), 10.49 (s, 1H), 7.36 (d,  $J = 8.1$  Hz, 2H), 7.25 (d,  $J = 8.0$  Hz, 2H), 7.05 – 7.00 (m, 4H), 6.89 – 6.78 (m, 5H), 2.19 (s, 3H).  $^{13}\text{C}$  NMR (100 MHz, DMSO- $d_6$ , ppm)  $\delta$  179.2, 139.4, 137.4, 135.1, 130.7, 128.6, 126.2, 125.9, 124.8, 121.37, 121.3, 118.7, 114.9, 112.0, 109.8, 53.1, 21.3.

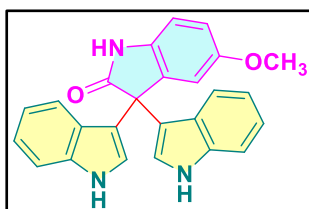

5'-methoxy-1H,1''H-[3,3':3',3''-terindol]-2'(1'H)-one 7ag. Light-brown solid; Yield: 93%; mp (°C): 292-294 [301-303];<sup>18,20</sup> FT-IR (ATR,  $\text{cm}^{-1}$ ): 3359, 1685, 1487, 1199, 1016, 787, 740, 590, 424;  $^1\text{H}$  NMR (400 MHz, DMSO- $d_6$ , ppm)  $\delta$  10.95 (s, 2H), 10.44 (s, 1H), 7.35 (d,  $J = 8.1$  Hz, 2H), 7.23 (d,  $J = 8.0$  Hz, 2H), 7.02 (t,  $J = 7.5$  Hz, 2H), 6.92 – 6.87 (m, 3H), 6.82 – 6.79 (m, 4H), 3.61 (s, 3H).  $^{13}\text{C}$  NMR (100 MHz, DMSO- $d_6$ , ppm)  $\delta$  179.1, 155.1,

137.4, 136.4, 135.2, 126.1, 124.8, 121.4, 121.2, 118.7, 114.7, 112.6, 112.5, 112.1, 110.3, 55.8, 53.5.

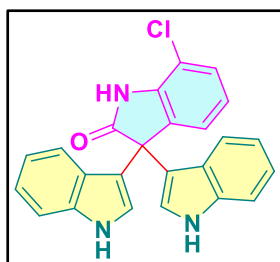

7'-chloro-1H,1''H-[3,3':3',3''-terindol]-2'(1'H)-one **7ah**. Pale-pink solid; Yield: 92%; mp (°C): 290-292 [288-289];<sup>21</sup> FT-IR (ATR, cm<sup>-1</sup>): 3414, 1724, 740, 483; <sup>1</sup>H NMR (400 MHz, DMSO-d<sub>6</sub>, ppm) δ 11.05 (s, 1H), 11.03 (d, *J* = 1.6 Hz, 2H), 7.37 (d, *J* = 8.1 Hz, 2H), 7.32 (d, *J* = 8.1 Hz, 1H), 7.23 7.19 (m, 3H), 7.03 (t, *J* = 7.5 Hz, 2H), 6.97 (t, *J* = 7.8 Hz, 1H), 6.87 (d, *J* = 2.4 Hz, 2H), 6.82 (t, *J* = 7.5 Hz, 2H). <sup>13</sup>C NMR (100 MHz, DMSO-d<sub>6</sub>, ppm) δ 179.1, 155.1, 137.4, 136.4, 135.2, 126.1, 124.8, 121.4, 121.2, 118.7, 114.7, 112.6, 112.5, 112.1, 110.3, 55.8, 53.5.

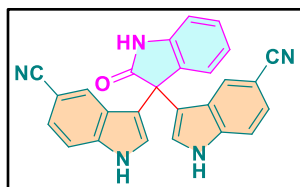

2'-oxo-1',2'-dihydro-1H,1''H-[3,3':3',3''-terindole]-5,5''-dicyanitrile **7ba**. Lemom-yellow solid; Yield: 90%; mp (°C): >300 [303-305];<sup>22</sup> FT-IR (ATR, cm<sup>-1</sup>): 1720, 1600, 1280, 1010, 831, 776, 410; <sup>1</sup>H NMR (400 MHz, DMSO-d<sub>6</sub>, ppm) 11.66 (d, *J* = 1.5 Hz, 2H), 10.84 (s, 1H), 7.59 – 7.57 (m, 4H), 7.41 (dd, *J* = 8.6, 1.3 Hz, 2H), 7.33 – 7.26 (m, 2H), 7.12 (d, *J* = 2.4 Hz, 2H), 7.08 – 6.99 (m, 2H). <sup>13</sup>C NMR (100 MHz, DMSO-d<sub>6</sub>, ppm) 178.7, 141.6, 139.3, 133.6, 129.0, 127.5, 126.2, 125.7, 125.5, 124.3, 122.6, 121.1, 115.5, 113.9, 110.6, 101.1, 52.5.

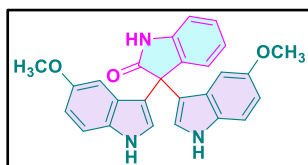

5,5''-dimethoxy-1H,1''H-[3,3':3',3''-terindol]-2'(1'H)-one **7ca**. Off-white solid solid; Yield: 88%; mp (°C): 291-293 [290-293];<sup>23</sup> FT-IR (ATR, cm<sup>-1</sup>): 3386, 3314, 1683, 1474, 1207, 1019, 804, 759, 645; <sup>1</sup>H NMR (400 MHz, DMSO-d<sub>6</sub>, ppm) 10.80 (d, *J* = 1.6 Hz, 2H), 10.61 (s, 1H), 7.27 – 7.21 (m, 4H), 7.01 (d, *J* = 7.6 Hz, 1H), 6.95 (t, *J* = 7.5 Hz, 1H), 6.87 (d, *J* = 2.4 Hz, 2H), 6.72 – 6.70 (m, 4H), 3.53 (s, 6H). <sup>13</sup>C NMR (100 MHz, DMSO-d<sub>6</sub>, ppm) 179.3, 152.9, 141.9, 135.0, 132.7, 128.3, 126.6, 125.7, 125.4, 121.9, 114.1, 112.6, 110.9, 109.9, 103.8, 55.6, 53.0.

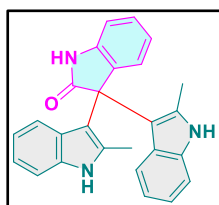

2,2''-dimethyl-1H,1''H-[3,3':3',3''-terindol]-2'(1'H)-one **7da**. Off-white solid; Yield: 90%; mp (°C): 296-298 [286-287];<sup>14,21,24</sup> FT-IR (ATR, cm<sup>-1</sup>): 3394, 1704, 1621, 1471, 1304, 1070, 923, 752, 608, 521; <sup>1</sup>H NMR (400 MHz, DMSO-d<sub>6</sub>, ppm) δ 10.87 (s, 2H), 10.33 (s, 1H), 7.20 – 6.27 (m, 12H), 3.38 (s, 6H). <sup>13</sup>C NMR (100 MHz, DMSO-d<sub>6</sub>, ppm) δ 179.1, 142.0, 135.3, 134.6, 133.9, 129.5, 127.1, 125.4, 122.2, 120.3, 119.6, 118.6, 110.7, 110.1, 109.9, 76.3, 13.8.

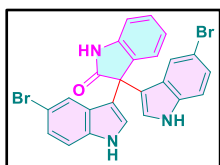

5,5''-dibromo-1H,1''H-[3,3':3',3''-terindol]-2'(1'H)-one **7ea**. White solid;

**Yield:** 93%; **mp** (°C): >300 [320-321];<sup>14,21</sup> **FT-IR** (ATR, cm<sup>-1</sup>): 3418,

3269, 1713, 1468, 1099, 885, 798, 750, 548, 486; **<sup>1</sup>H NMR** (400 MHz,

**DMSO-d<sub>6</sub>**, ppm) δ 11.16 (d, *J* = 1.8 Hz, 2H), 10.67 (s, 1H), 7.30 – 7.28 (m, 4H), 7.22 – 7.18 (m, 1H), 7.11 – 7.07 (m, 3H), 6.96 – 6.90 (m, 2H), 6.84 (d, *J* = 2.5 Hz, 2H). **<sup>13</sup>C NMR** (100 MHz, **DMSO-d<sub>6</sub>**, ppm) δ 178.91, 141.68, 136.16, 134.06, 128.74, 127.73, 126.46, 125.35, 124.10, 123.13, 122.30, 114.31, 114.27, 111.53, 110.31, 52.62.

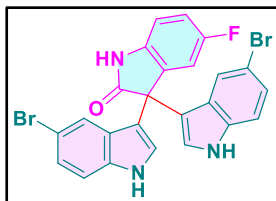

5,5''-dibromo-5'-fluoro-1H,1''H-[3,3':3',3''-terindol]-2'(1'H)-one **7ec**.

White solid; **Yield:** 94%; **mp** (°C): >300 [332-224];<sup>25</sup> **FT-IR** (ATR,

cm<sup>-1</sup>): 3387, 3306, 1690, 1483, 1452, 1174, 885, 793, 588; **<sup>1</sup>H NMR**

(400 MHz, **DMSO-d<sub>6</sub>**, ppm) 11.28 (d, *J* = 1.8 Hz, 2H), 10.79 (s, 1H),

7.39 – 7.37 (m, 4H), 7.19 – 7.10 (m, 3H), 7.05 – 6.99 (m, 2H), 6.97 (d, *J* = 2.5 Hz, 2H). **<sup>13</sup>C NMR** (100 MHz, **DMSO-d<sub>6</sub>**, ppm) 178.9, 158.45 (d, *J*<sub>C-F</sub> = 238.3 Hz, *ipso*-C), 137.9, 136.2, 135.7 (d, *J*<sub>C-F</sub> = 7.4 Hz), 127.6, 126.6, 124.2, 122.9, 115.2 (d, *J*<sub>C-F</sub> = 23.4 Hz), 114.4, 113.7, 112.9 (d, *J*<sub>C-F</sub> = 24.6 Hz), 111.6, 111.2 (d, *J*<sub>C-F</sub> = 8.5 Hz), 53.1.

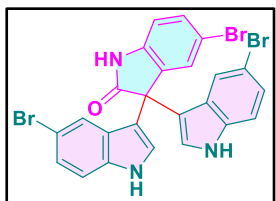

5,5',5''-tribromo-1H,1''H-[3,3':3',3''-terindol]-2'(1'H)-one **7ed**.

Merino-white solid; **Yield:** 92%; **mp** (°C): >300 [ >300];<sup>21</sup> **FT-IR**

(ATR, cm<sup>-1</sup>): 3374, 1694, 1453, 1168, 1104, 884, 796, 623, 551, 513.

**<sup>1</sup>H NMR** (400 MHz, **DMSO-d<sub>6</sub>**, ppm) δ 11.29 (d, *J* = 1.9 Hz, 2H),

10.91 (s, 1H), 7.47 (dd, *J* = 8.3, 1.9 Hz, 1H), 7.40 7.36 (m, 4H), 7.26 (d, *J* = 1.8 Hz, 1H), 7.18 (dd, *J* = 8.6, 1.8 Hz, 2H), 7.01 (d, *J* = 8.3 Hz, 1H), 6.96 (d, *J* = 2.5 Hz, 2H). **<sup>13</sup>C NMR** (100 MHz, **DMSO-d<sub>6</sub>**, ppm) δ 178.5, 141.1, 136.4, 136.2, 131.6, 127.9, 127.5, 126.7, 124.7, 124.3, 123.3, 122.9, 114.5, 113.9, 113.5, 112.4, 111.7, 52.8.

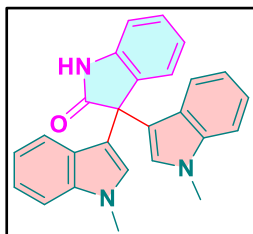

1,1''-dimethyl-1H,1''H-[3,3':3',3''-terindol]-2'(1'H)-one **7fa**. Biege-white

solid; **Yield:** 91%; **mp** (°C): >300 [>300];<sup>20</sup> **FT-IR** (ATR, cm<sup>-1</sup>): 1697,

1470, 1330, 1208, 735, 681, 633, 427; **<sup>1</sup>H NMR** (400 MHz, **DMSO-d<sub>6</sub>**,

ppm) δ 10.64 (s, 1H), 7.38 (d, *J* = 8.2 Hz, 2H), 7.27 – 7.22 (m, 4H), 7.09

(t, *J* = 7.4 Hz, 2H), 7.00 (d, *J* = 7.6 Hz, 1H), 6.95 (d, *J* = 7.4 Hz, 1H), 6.94

– 6.90 (m, 2H), 6.85 (t, *J* = 7.5 Hz, 2H), 3.70 (s, 6H). **<sup>13</sup>C NMR** (100 MHz, **DMSO-d<sub>6</sub>**, ppm) δ 179.0, 141.7, 137.8, 134.9, 128.9, 128.4, 126.5, 125.4, 122.1, 121.6, 121.4, 1189, 113.9, 110.2, 110.1, 52.9, 32.8.

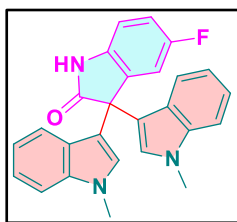

5'-fluoro-1,1''-dimethyl-1H,1''H-[3,3':3',3''-terindol]-2'(1'H)-one **7fb.**

White solid; Yield: 92%; mp (°C): >300 [ $>300$ ];<sup>20</sup> FT-IR (ATR,  $\text{cm}^{-1}$ ): 3365, 1685, 1480, 1179, 865, 795, 746, 673, 594, 432;  $^1\text{H}$  NMR (400 MHz,  $\text{DMSO-d}_6$ , ppm)  $\delta$  10.66 (s, 1H), 7.39 (d,  $J = 8.2$  Hz, 2H), 7.23 (d,  $J = 8.0$  Hz, 2H), 7.11 – 7.03 (m, 4H), 6.99 – 6.96 (m, 1H), 6.94 (s, 2H), 6.86 (t,  $J = 7.5$  Hz, 2H), 3.72 (s, 6H).  $^{13}\text{C}$  NMR (100 MHz,  $\text{DMSO-d}_6$ , ppm)  $\delta$  178.9, 158.3 (d,  $J_{\text{C-F}} = 241.5$  Hz, ipso-C), 137.9, 137.8, 136.6 (d,  $J_{\text{C-F}} = 7.4$  Hz), 129.1, 126.3, 121.6, 121.2, 119.0, 114.8 (d,  $J_{\text{C-F}} = 23.3$  Hz), 113.2, 112.9 (d,  $J_{\text{C-F}} = 24.0$  Hz), 110.9 (d,  $J_{\text{C-F}} = 8.1$  Hz), 110.3, 53.4, 32.8.

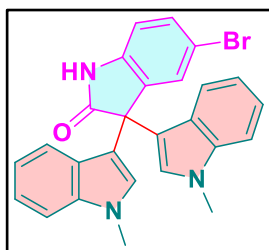

5'-bromo-1,1''-dimethyl-1H,1''H-[3,3':3',3''-terindol]-2'(1'H)-one **7fd.**

Ivory-cream solid; Yield: 91%; mp (°C): >300 [325-327];<sup>24,26</sup> FT-IR (ATR,  $\text{cm}^{-1}$ ): 1715, 1613, 1471, 750, 732, 554, 431;  $^1\text{H}$  NMR (400 MHz,  $\text{DMSO-d}_6$ , ppm)  $\delta$  10.71 (s, 1H), 7.34 – 7.31 (m, 3H), 7.24 (d,  $J = 1.6$  Hz, 1H), 7.14 (d,  $J = 8.0$  Hz, 2H), 7.04 – 7.00 (m, 2H), 6.91 – 6.86 (m, 3H), 6.79 (t,  $J = 7.5$  Hz, 2H), 3.64 (s, 6H).  $^{13}\text{C}$  NMR (100 MHz,  $\text{DMSO-d}_6$ , ppm)  $\delta$  178.5, 141.1, 137.8, 137.3, 131.3, 129.0, 127.8, 126.3, 121.7, 121.2, 119.1, 113.7, 113.1, 112.2, 110.4, 53.1, 32.8.

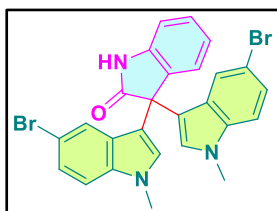

5,5''-dibromo-1,1''-dimethyl-1H,1''H-[3,3':3',3''-terindol]-2'(1'H)-one **7ga.**

White solid; Yield: 95%; mp (°C): >300; FT-IR (ATR,  $\text{cm}^{-1}$ ): 3385, 1721, 1468, 1193, 788, 768, 660, 565, 542;  $^1\text{H}$  NMR (400 MHz,  $\text{DMSO-d}_6$ , ppm)  $\delta$  10.76 (s, 1H), 7.41 – 7.37 (m, 4H), 7.27 (t,  $J = 7.6$  Hz, 1H), 7.22 (dd,  $J = 8.7, 1.8$  Hz, 2H), 7.17 (d,  $J = 7.3$  Hz, 1H), 7.03 – 6.96 (m, 2H), 6.96 (s, 2H), 3.72 (s, 6H).  $^{13}\text{C}$  NMR (100 MHz,  $\text{DMSO-d}_6$ , ppm)  $\delta$  178.7, 141.6, 136.6, 133.9, 130.6, 128.8, 127.9, 125.4, 124.2, 123.2, 122.4, 113.3, 112.7, 111.9, 110.3, 52.5, 33.1. HRMS(ESI): Calcd. for  $\text{C}_{26}\text{H}_{19}\text{Br}_2\text{N}_3\text{O}$   $[\text{M}+\text{H}]^+$  m/z: 547.9973; Found,  $[\text{M}+\text{H}]^+$ : 547.9972.

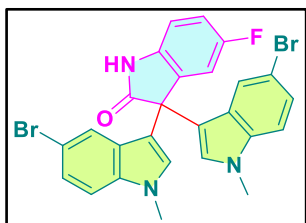

5,5''-dibromo-5'-fluoro-1,1''-dimethyl-1H,1''H-[3,3':3',3''-terindol]-2'(1'H)-one **7gc.**

White solid; Yield: 89%; mp (°C): >300; FT-IR (ATR,  $\text{cm}^{-1}$ ): 3387, 3306, 1690, 1483, 1452, 1174, 885, 793, 588;  $^1\text{H}$  NMR (400 MHz,  $\text{DMSO-d}_6$ , ppm) 10.80 (s, 1H), 7.43 (s, 1H), 7.40 – 7.39 (m, 3H), 7.24 (dd,  $J = 8.7, 1.8$  Hz, 2H), 7.13 (td,  $J = 9.1, 2.6$  Hz, 1H), 7.04 – 6.98 (m, 4H), 3.73 (s, 6H).  $^{13}\text{C}$  NMR (100 MHz,  $\text{DMSO-d}_6$ , ppm) 178.7, 158.5 (d,  $J_{\text{C-F}} = 238.7$  Hz, ipso-C), 137.8, 136.6, 135.6 (d,  $J_{\text{C-F}} = 7.6$  Hz), 130.8, 127.7, 124.3, 123.1, 115.3 (d,  $J_{\text{C-F}} = 23.7$  Hz), 113.2, 112.9 (d,  $J_{\text{C-F}} = 24.0$  Hz), 110.9 (d,  $J_{\text{C-F}} = 8.1$  Hz), 110.3, 53.4, 32.8.

Hz), 113.2, 112.9, 112.7 (d,  $J_{C-F}$  = 4.4 Hz), 111.7 (d,  $J_{C-F}$  = 8.2 Hz), 111.2, 52.9, 33.1. **HRMS(ESI)**: Calcd. for  $C_{26}H_{18}Br_2FN_3O$   $[M+H]^+$  m/z: 565.9879; Found,  $[M+H]^+$ : 565.9881.

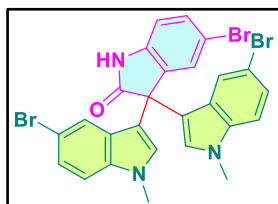

5,5',5''-tribromo-1,1''-dimethyl-1H,1''H-[3,3':3',3''-terindol]-2'(1'H)-one 7gd. White solid; Yield: 93%; mp (°C): >300; FT-IR (ATR,  $cm^{-1}$ ): 1725, 1471, 1285, 1201, 870, 820, 788, 688, 545;  $^1H$  NMR (400 MHz, DMSO- $d_6$ , ppm)  $\delta$  10.92 (s, 1H), 7.45 – 7.37 (m, 5H), 7.25 – 7.23 (m, 3H), 7.01 6.99 (m, 3H), 3.73 (s, 1H).  $^{13}C$  NMR (100 MHz, DMSO- $d_6$ , ppm)  $\delta$  178.3, 140.9, 136.7, 136.3, 131.7, 130.7, 127.9, 127.7, 124.3, 123.0, 114.1, 112.8, 112.5, 112.4, 111.9, 52.7, 33.1. **HRMS(ESI)**: Calcd. for  $C_{26}H_{18}Br_3N_3O$   $[M+H]^+$  m/z: 625.9078; Found,  $[M+H]^+$ : 625.9080.

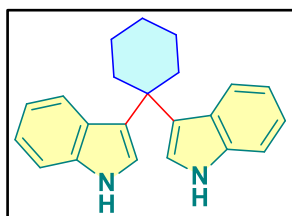

3,3'-(cyclohexane-1,1-diyl)bis(1H-indole) 7ai. Tortilla solid; Yield: 86%; mp (°C): 121-123 [76-78];<sup>27</sup> FT-IR (ATR,  $cm^{-1}$ ): 3406, 2289, 2930, 1454, 1414, 1334, 1099, 738, 581, 493, 456;  $^1H$  NMR (400 MHz, DMSO- $d_6$ , ppm)  $\delta$  10.74 (s, 2H), 7.36 (d,  $J$  = 8.0 Hz, 2H), 7.32 (s, 2H), 7.26 (d,  $J$  = 8.1 Hz, 2H), 6.90 (t,  $J$  = 7.4 Hz, 2H), 6.70 (t,  $J$  = 7.4 Hz, 2H), 2.51 – 2.45 (m, 5H), 1.60 (s, 3H), 1.52 (s, 2H).  $^{13}C$  NMR (100 MHz, DMSO- $d_6$ , ppm)  $\delta$  137.4, 126.4, 122.6, 122.5, 121.0, 120.5, 117.9, 111.7, 39.0, 37.1, 26.9, 23.1.

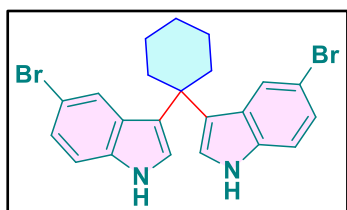

3,3'-(cyclohexane-1,1-diyl)bis(5-bromo-1H-indole) 7ei. Dark-yellow solid; Yield: 81%; mp (°C): 225-227 [223-224];<sup>25</sup>  $^1H$  NMR (400 MHz, DMSO- $d_6$ , ppm) 11.10 (s, 2H), 7.48 (d,  $J$  = 31.9 Hz, 4H), 7.31 (s, 2H), 7.08 (s, 2H), 2.39 (s, 4H), 1.58 – 1.49 (m, 6H).  $^{13}C$  NMR (100 MHz, DMSO- $d_6$ , ppm) 136.2, 128.1, 124.3, 123.3, 122.8, 122.0, 113.9, 110.9, 38.7, 37.2, 26.8, 22.9.

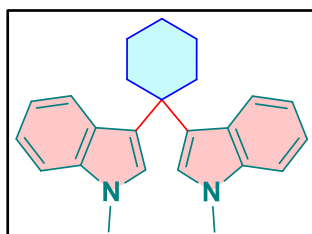

3,3'-(cyclohexane-1,1-diyl)bis(1-methyl-1H-indole) 7fi. Cream-white solid; Yield: 92%; mp (°C): 211-213 [206-208];<sup>28</sup> FT-IR (ATR,  $cm^{-1}$ ): 2938, 1484, 1329, 1245, 816, 740, 561, 434;  $^1H$  NMR (400 MHz, DMSO- $d_6$ , ppm) 7.37 (d,  $J$  = 8.0 Hz, 2H), 7.30 (s, 2H), 7.27 (d,  $J$  = 8.2 Hz, 2H), 6.96 (t,  $J$  = 7.5 Hz, 2H), 6.74 (t,  $J$  = 7.5 Hz, 2H), 3.74 (s, 6H), 2.42 – 2.40 (m, 4H), 1.58 – 1.49 (m, 6H).  $^{13}C$  NMR (100 MHz, DMSO- $d_6$ , ppm) 137.7, 127.2, 126.7, 121.6, 121.1, 120.7, 118.1, 109.9, 39.0, 37.2, 32.8, 26.8, 22.9.

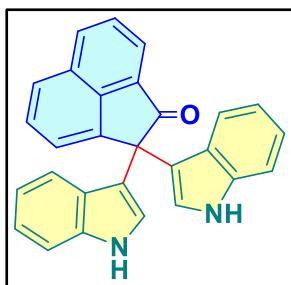

2,2-di(1H-indol-3-yl)acenaphthylen-1(2H)-one **7aj**. Lemon-yellow **solid**; **Yield**: 93%; **mp** (°C): 241-243 [242-244];<sup>16</sup> **FT-IR** (ATR, cm<sup>-1</sup>): 3416, 3357, 1682, 1339, 1101, 778, 737, 555; **<sup>1</sup>H NMR** (400 MHz, DMSO-d<sub>6</sub>, ppm) δ 10.99 (s, 1H), 8.36 (d, *J* = 8.1 Hz, 1H), 8.02 – 7.99 (m, 2H), 7.90 (t, *J* = 7.5 Hz, 1H), 7.70 (t, *J* = 7.6 Hz, 1H), 7.55 (d, *J* = 6.9 Hz, 1H), 7.35 (d, *J* = 8.1 Hz, 2H), 7.02 – 6.98 (m, 4H), 6.85 (d, *J* = 2.0 Hz, 2H), 6.74 (t, *J* = 7.5 Hz, 2H). **<sup>13</sup>C NMR** (100 MHz, DMSO-d<sub>6</sub>, ppm) δ 203.1, 144.3, 140.1, 137.4, 132.5, 131.9, 130.9, 129.5, 129.3, 126.2, 125.1, 124.6, 122.7, 122.2, 121.5, 121.1, 118.8, 115.3, 114.9, 112.2, 58.1.

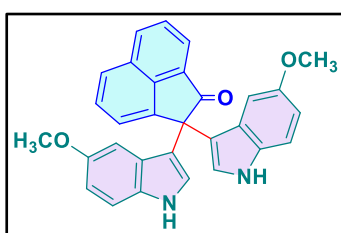

2,2-bis(5-methoxy-1H-indol-3-yl)acenaphthylen-1(2H)-one **7cj**. Lemon-yellow **solid**; **Yield**: 90%; **mp** (°C): 281-283 [284-286];<sup>16</sup> **FT-IR** (ATR, cm<sup>-1</sup>): 3395, 3367, 1698, 1481, 1231, 1028, 777, 613, 512; **<sup>1</sup>H NMR** (400 MHz, DMSO-d<sub>6</sub>, ppm) 10.80 (s, 2H), 8.36 (d, *J* = 8.1 Hz, 1H), 8.02 – 8.00 (m, 2H), 7.89 (t, *J* = 7.5 Hz, 1H), 7.70 (t, *J* = 7.6 Hz, 1H), 7.54 (d, *J* = 6.9 Hz, 1H), 7.24 (d, *J* = 8.8 Hz, 2H), 6.86 (s, 2H), 6.67 (d, *J* = 8.8 Hz, 2H), 6.42 (s, 2H), 3.40 (s, 6H). **<sup>13</sup>C NMR** (100 MHz, DMSO-d<sub>6</sub>, ppm) 203.2, 152.9, 144.3, 140.2, 132.7, 132.5, 132.2, 130.9, 129.5, 129.3, 126.7, 125.9, 124.5, 122.5, 122.2, 114.7, 112.6, 110.9, 103.7, 58.1, 55.5.

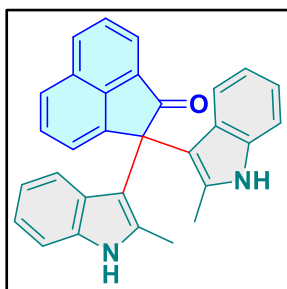

2,2-bis(2-methyl-1H-indol-3-yl)acenaphthylen-1(2H)-one **7dj**. Tortilla-brown **solid**; **Yield**: 92%; **mp** (°C): 291-293 [292-293];<sup>29</sup> **FT-IR** (ATR, cm<sup>-1</sup>): 3383, 3340, 1712, 1459, 1022, 781, 741, 521; **<sup>1</sup>H NMR** (400 MHz, DMSO-d<sub>6</sub>, ppm) 10.84 (d, *J* = 9.7 Hz, 2H), 8.27 (d, *J* = 8.1 Hz, 1H), 7.96 – 7.95 (m, 2H), 7.80 (t, *J* = 7.6 Hz, 1H), 7.60 – 7.56 (m, 1H), 7.36 (d, *J* = 7.0 Hz, 1H), 7.15 – 7.12 (m, 2H), 6.83 – 6.77 (m, 2H), 6.54 – 6.44 (m, 3H), 6.25 (d, *J* = 8.1 Hz, 1H), 1.77 (s, 3H), 1.71 (s, 3H). **<sup>13</sup>C NMR** (100 MHz, DMSO-d<sub>6</sub>, ppm) δ 202.5, 144.5, 140.3, 135.5, 135.5, 134.2, 134.1, 133.9, 133.8, 133.2, 132.1, 130.8, 129.4, 129.2, 128.1, 127.8, 124.6, 122.8, 122.3, 120.3, 120.2, 120.0, 119.91, 118.5, 118.4, 111.4, 110.9, 110.5, 57.9, 13.89, 13.8.

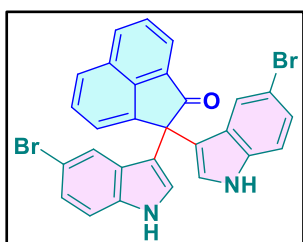

2,2-bis(5-bromo-1H-indol-3-yl)acenaphthylen-1(2H)-one **7ej**. Light-yellow **solid**; **Yield**: 91%; **mp** (°C): >300 [>300];<sup>29</sup> **FT-IR** (ATR, cm<sup>-1</sup>): 3428, 3338, 1076, 1455, 1093, 782, 663, 605, 460, 418; **<sup>1</sup>H NMR** (400 MHz, DMSO-d<sub>6</sub>, ppm) δ 11.28 (s, 2H), 8.39 (s, 1H), 8.06

– 8.04 (m, 2H), 7.92 (t,  $J = 7.6$  Hz, 1H), 7.74 (t,  $J = 7.6$  Hz, 1H), 7.54 (d,  $J = 6.9$  Hz, 1H), 7.37 (d,  $J = 9.1$  Hz, 2H), 7.15 (d,  $J = 6.3$  Hz, 4H), 6.95 (d,  $J = 2.3$  Hz, 2H).  $^{13}\text{C}$  NMR (100 MHz, DMSO- $\text{d}_6$ , ppm)  $\delta$  202.8, 143.3, 140.0, 136.2, 132.9, 131.5, 130.9, 129.6, 129.5, 127.9, 126.8, 124.9, 124.2, 123.1, 122.9, 122.3, 114.7, 114.4, 111.6, 57.7.

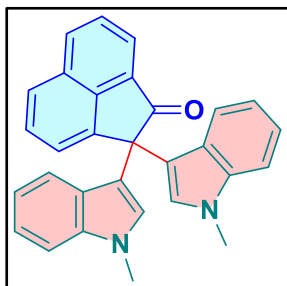

2,2-bis(1-methyl-1H-indol-3-yl)acenaphthylen-1(2H)-one **7ff**. Light-yellow solid; Yield: 87%; mp ( $^{\circ}\text{C}$ ):  $>300$  [ $>300$ ];<sup>29</sup> FT-IR (ATR,  $\text{cm}^{-1}$ ): 1715, 1463, 1330, 977, 785, 735, 560, 431;  $^1\text{H}$  NMR (400 MHz, DMSO- $\text{d}_6$ , ppm)  $\delta$  8.36 (d,  $J = 8.0$  Hz, 1H), 8.01 (d,  $J = 7.6$  Hz, 2H), 7.90 (t,  $J = 7.5$  Hz, 2H), 7.69 (t,  $J = 7.6$  Hz, 1H), 7.56 (d,  $J = 6.8$  Hz, 1H), 7.37 (d,  $J = 8.1$  Hz, 2H), 7.06 (dd,  $J = 14.6, 7.6$  Hz, 6H), 6.88 (s, 3H), 6.79 (t,  $J = 7.4$  Hz, 3H), 3.67 (s, 11H).  $^{13}\text{C}$  NMR (100 MHz, DMSO- $\text{d}_6$ , ppm)  $\delta$  202.9, 144.2, 139.9, 137.8, 132.6, 131.9, 130.9, 129.6, 129.4, 129.3, 126.6, 124.6, 122.8, 122.2, 121.6, 121.2, 119.0, 114.4, 110.3, 57.9, 32.8.

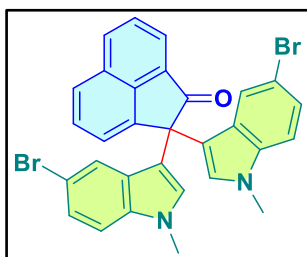

2,2-bis(5-bromo-1-methyl-1H-indol-3-yl)acenaphthylen-1(2H)-one **7gj**. Pastel-cream solid; Yield: 94%; mp ( $^{\circ}\text{C}$ ):  $>300$ ; FT-IR (ATR,  $\text{cm}^{-1}$ ): 1724, 1473, 1283, 1208, 826, 793, 423;  $^1\text{H}$  NMR (400 MHz, DMSO- $\text{d}_6$ , ppm) 8.40 (d,  $J = 8.1$  Hz, 1H), 8.06 – 8.04 (m, 2H), 7.94 – 7.90 (m, 1H), 7.76 – 7.72 (m, 1H), 7.53 (d,  $J = 6.9$  Hz, 1H), 7.40 (d,  $J = 8.7$  Hz, 2H), 7.21 (dd,  $J = 8.7, 1.8$  Hz, 2H), 7.15 (d,  $J = 1.6$  Hz), 6.98 (s, 2H), 3.69 (s, 6H).  $^{13}\text{C}$  NMR (100 MHz, DMSO- $\text{d}_6$ , ppm)  $\delta$  202.6, 143.1, 139.9, 136.7, 132.9, 131.4, 130.9, 130.9, 129.7, 129.6, 128.0, 124.9, 124.3, 123.2, 123.0, 122.3, 113.7, 112.8, 111.9, 57.6, 33.1. HRMS(ESI): Calcd. for  $\text{C}_{30}\text{H}_{20}\text{Br}_2\text{N}_2\text{O}$   $[\text{M}+\text{H}]^+$   $m/z$ : 583.0021; Found,  $[\text{M}+\text{H}]^+$ : 583.0026.

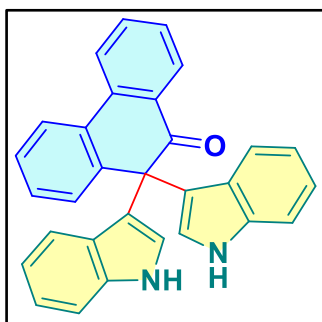

10,10-di(1H-indol-3-yl)phenanthren-9(10H)-one **7gk**. Yellow solid; Yield: 87%; mp ( $^{\circ}\text{C}$ ):  $>300$ ; FT-IR (ATR,  $\text{cm}^{-1}$ ): 3333, 1671, 1560, 1449, 1267, 1102, 733, 630, 459;  $^1\text{H}$  NMR (400 MHz, DMSO- $\text{d}_6$ , ppm) 10.92 (s, 2H), 8.24 (dd,  $J = 21.3, 7.5$  Hz, 2H), 7.72 – 7.65 (m, 2H), 7.46 (t,  $J = 6.9$  Hz, 2H), 7.35 (d,  $J = 7.7$  Hz, 1H), 7.03 (t,  $J = 7.0$  Hz, 1H), 6.93 (t,  $J = 9.8$  Hz, 1H), 6.81 (t,  $J = 7.1$  Hz, 1H), 6.43 (s, 1H).  $^{13}\text{C}$  NMR (100 MHz, DMSO- $\text{d}_6$ , ppm) 178.7, 159.6, 157.3, 137.8, 136.6, 135.6, 135.6, 130.8, 127.7, 124.3, 123.1, 115.4, 115.2, 113.2, 112.9, 112.7, 112.7, 111.9, 111.3, 111.2, 52.9, 33.1. HRMS(ESI): Calcd. for  $\text{C}_{30}\text{H}_{20}\text{N}_2\text{O}$   $[\text{M}+\text{Na}]^+$   $m/z$ : 447.1473; Found,  $[\text{M}+\text{Na}]^+$ : 447.1475.

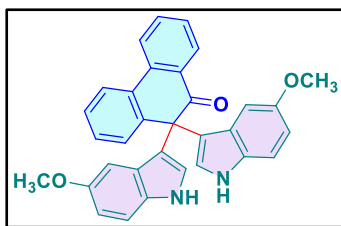

10,10-bis(5-methoxy-1H-indol-3-yl)phenanthren-9(10H)-one

**7ck.** Lemon-yellow solid; Yield: 91%; mp (°C): >300; FT-IR (ATR, cm<sup>-1</sup>): 1720, 1600, 1280, 1010, 894, 831, 776; <sup>1</sup>H NMR (400 MHz, DMSO-d<sub>6</sub>, ppm) 10.78 (s, 2H), 8.23 (dd, *J* = 24.8, 7.9

Hz, 2H), 7.74 (d, *J* = 7.6 Hz, 1H), 7.66 (t, *J* = 7.5 Hz, 1H), 7.47 (t, *J* = 7.4 Hz, 1H), 7.35 (t, *J* = 7.4 Hz, 1H), 7.27 – 7.25 (m, 3H), 6.94 (d, *J* = 7.6 Hz, 1H), 6.71 (d, *J* = 7.2 Hz, 2H), 6.45 (s, 2H), 6.36 (s, 2H), 3.50 (s, 6H). <sup>13</sup>C NMR (100 MHz, DMSO-d<sub>6</sub>, ppm) 196.7, 153.1, 141.3, 136.6, 134.5, 132.7, 130.7, 130.4, 130.2, 129.3, 128.8, 128.3, 127.9, 127.4, 126.8, 124.6, 123.7, 115.1, 112.8, 110.8, 103.8, 57.1, 55.8. HRMS(ESI): Calcd. for C<sub>32</sub>H<sub>24</sub>N<sub>2</sub>O<sub>3</sub> [M+Na]<sup>+</sup> m/z: 507.1685; Found, [M+Na]<sup>+</sup>: 507.1685.

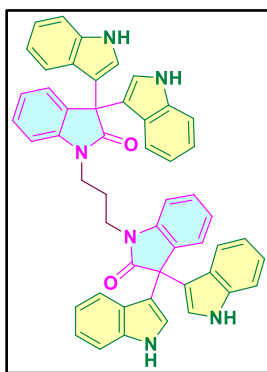

1',1'''-(propane-1,3-diyl)bis([3,3':3',3''-terindolin]-2'-one) **10aa.**

Brick-red solid; Yield: 94%; mp (°C): >300; FT-IR (ATR, cm<sup>-1</sup>): 3402, 1693, 1338, 1090, 734; <sup>1</sup>H NMR (400 MHz, DMSO-d<sub>6</sub>, ppm) 10.90 (d, *J* = 1.8 Hz, 4H), 7.28 (d, *J* = 8.1 Hz, 4H), 7.22 (d, *J* = 7.0 Hz, 2H), 7.15 – 7.08 (m, 6H), 6.95 – 6.89 (m, 8H), 6.78 (d, *J* = 2.4 Hz, 2H), 6.69 (t, *J* = 7.5 Hz, 4H), 1.98 – 1.92 (m, 4H), 1.10 (t, *J* = 7.1 Hz, 2H). <sup>13</sup>C NMR (100 MHz, DMSO-d<sub>6</sub>, ppm) 177.4, 142.2, 137.4, 134.3, 128.5,

126.1, 125.3, 124.8, 122.6, 121.5, 121.1, 118.8, 114.4, 112.1, 60.2, 37.9, 21.2. HRMS(ESI): Calcd. for C<sub>51</sub>H<sub>38</sub>N<sub>6</sub>O<sub>2</sub> [M+Na]<sup>+</sup> m/z: 789.2954; Found, [M+Na]<sup>+</sup>: 789.2955.

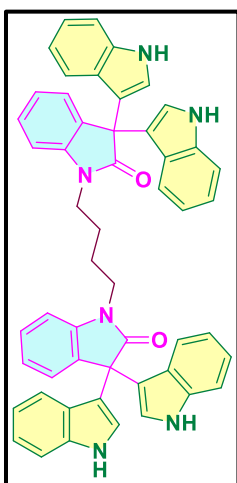

1',1'''-(butane-1,4-diyl)bis([3,3':3',3''-terindolin]-2'-one) **10ab.**

Sand-brown solid; Yield: 91%; mp (°C): >300; FT-IR (ATR, cm<sup>-1</sup>): 3363, 1676, 1609, 1359, 1100, 740, 615, 427; <sup>1</sup>H NMR (400 MHz, DMSO-d<sub>6</sub>, ppm) 10.96 (s, 4H), 7.37 – 7.14 (m, 15H), 7.01 (s, 6H), 6.87 – 6.79 (m, 7H), 3.83 (s, 4H), 1.76 (s, 4H). <sup>13</sup>C NMR (100 MHz, DMSO-d<sub>6</sub>, ppm) 177.36, 142.41, 137.40, 134.32, 128.44, 126.12, 125.18, 124.72, 122.49, 121.44, 121.13, 118.80, 114.57, 112.12, 109.30, 52.65, 25.16. HRMS(ESI): Calcd. for C<sub>52</sub>H<sub>40</sub>N<sub>6</sub>O<sub>2</sub> [M+H]<sup>+</sup> m/z: 781.3291; Found, [M+H]<sup>+</sup>: 781.3291.

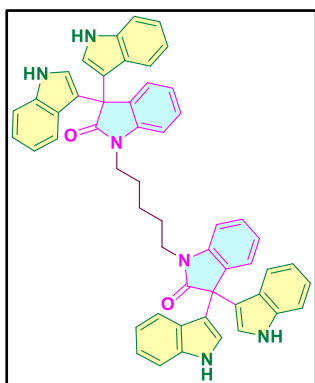

1',1'''-(pentane-1,5-diyl)bis([3,3':3',3''-terindolin]-2'-one)) 10ac.

Pale-sand brown solid; Yield: 85%; mp (°C): >300 [>300];<sup>24</sup> FT-IR (ATR, cm<sup>-1</sup>): 3342, 1665, 1607, 1466, 1095, 741, 476; <sup>1</sup>H NMR (400 MHz, DMSO-d<sub>6</sub>, ppm) 10.97 (s, 4H), 7.36 – 7.27 (m, 9H), 7.16 (d, *J* = 8.1 Hz, 4H), 7.03 – 6.98 (m, 7H), 6.86 – 6.85 (m, 4H), 6.79 (t, *J* = 7.4 Hz, 4H), 1.71 – 1.61 (m, 6H), 1.38 – 1.23 (m, 4H). <sup>13</sup>C NMR (100 MHz, DMSO-d<sub>6</sub>, ppm) 177.3, 158.5, 151.1, 142.4, 137.4, 134.3, 128.4, 126.1, 124.8, 121.4, 121.1, 118.8, 114.6, 112.1, 109.3, 52.7, 26.9, 23.9. DEPT-135 NMR (100 MHz, DMSO-d<sub>6</sub>, ppm) 138.7, 128.5, 124.8, 122.5, 121.4, 121.1, 118.8, 112.1, 109.3, 39.6, 26.9, 23.9.

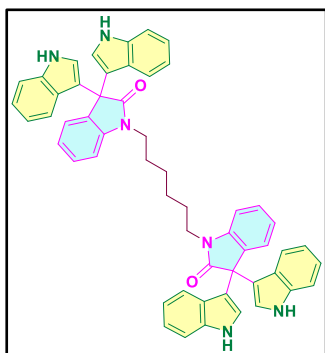

1',1'''-(hexane-1,6-diyl)bis([3,3':3',3''-terindolin]-2'-one)) 10ad.

Brick-red solid; Yield: 92%; mp (°C): 284-286 [283-285];<sup>24</sup> FT-IR (ATR, cm<sup>-1</sup>): 3359, 1665, 1608, 1464, 1367, 1100, 734, 651 607; <sup>1</sup>H NMR (400 MHz, DMSO-d<sub>6</sub>, ppm) 10.95 (s, 4H), 7.34 – 7.30 (m, 8H), 7.16 – 7.14 (m, 6H), 6.99 – 6.98 (m, 6H), 6.84 (s, 4H), 6.75 (s, 4H), 3.70 (s, 4H), 1.59 (s, 4H), 1.32 (s, 4H). <sup>13</sup>C NMR (100 MHz, DMSO-d<sub>6</sub>, ppm) 177.3, 142.5, 137.4, 134.3, 128.4, 126.1, 125.2, 124.8, 122.4, 121.1, 118.7, 114.5, 112.1, 109.3, 52.7, 27.4, 26.6. DEPT-135 NMR (100 MHz, DMSO-d<sub>6</sub>, ppm) 128.4, 125.2, 124.8, 122.5, 121.4, 121.1, 118.7, 112.1, 109.3, 39.9, 27.4, 26.6.

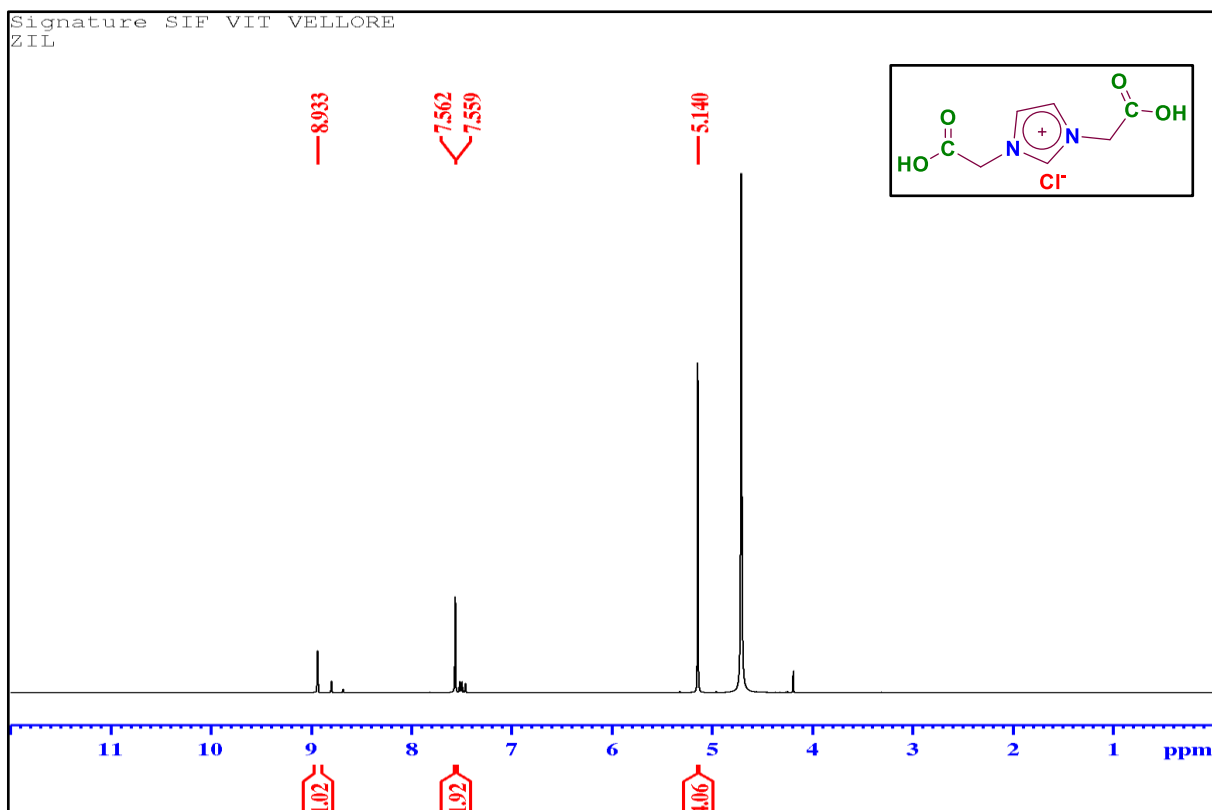

Fig. S1  $^1\text{H}$  NMR spectrum (400 MHz) of **4** in  $\text{D}_2\text{O}$ .

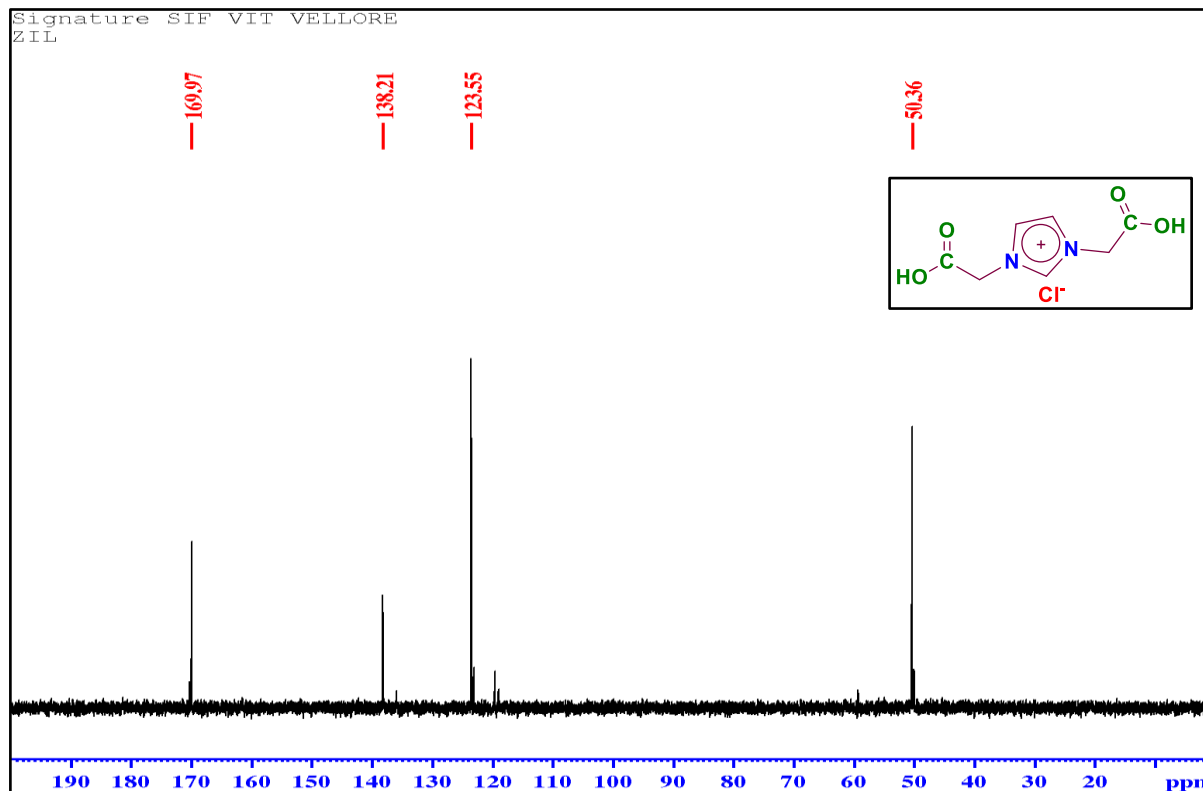

Fig. S2  $^{13}\text{C}$  NMR spectrum (100 MHz) of **4** in  $\text{D}_2\text{O}$ .

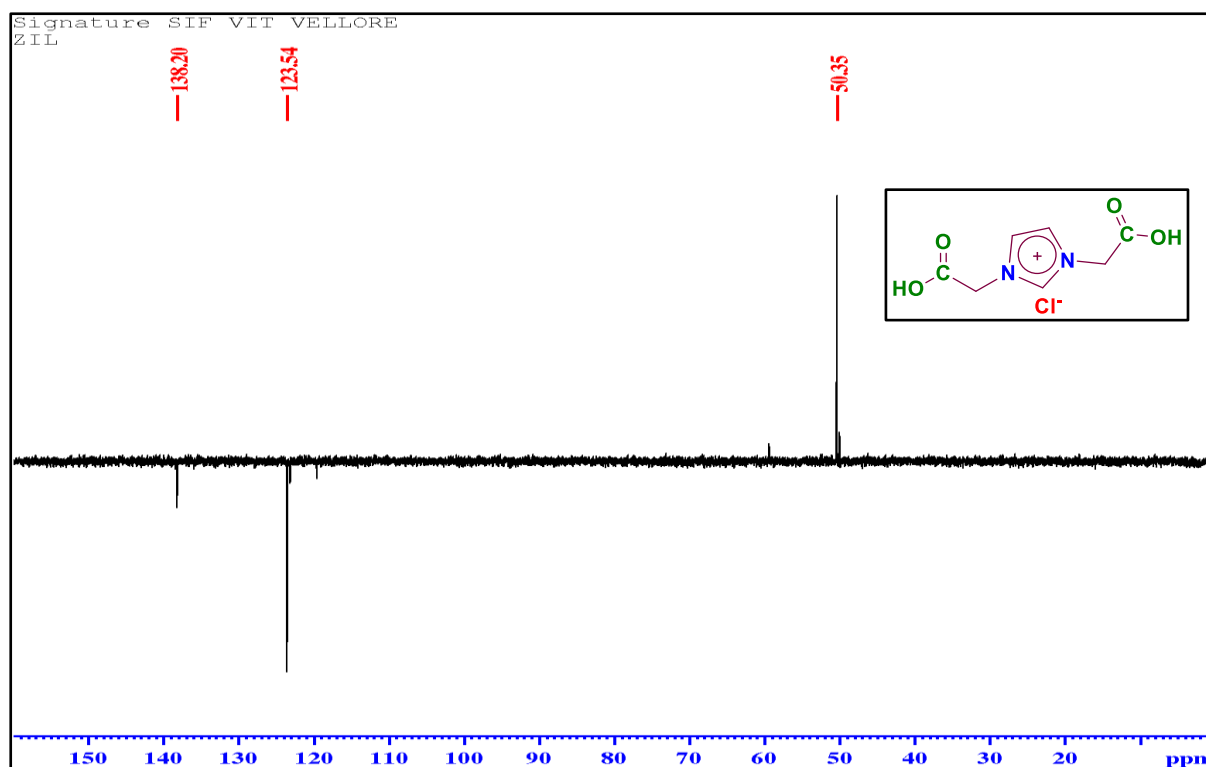

Fig. S3 DEPT-135 spectrum of (100 MHz) 4 in D<sub>2</sub>O.

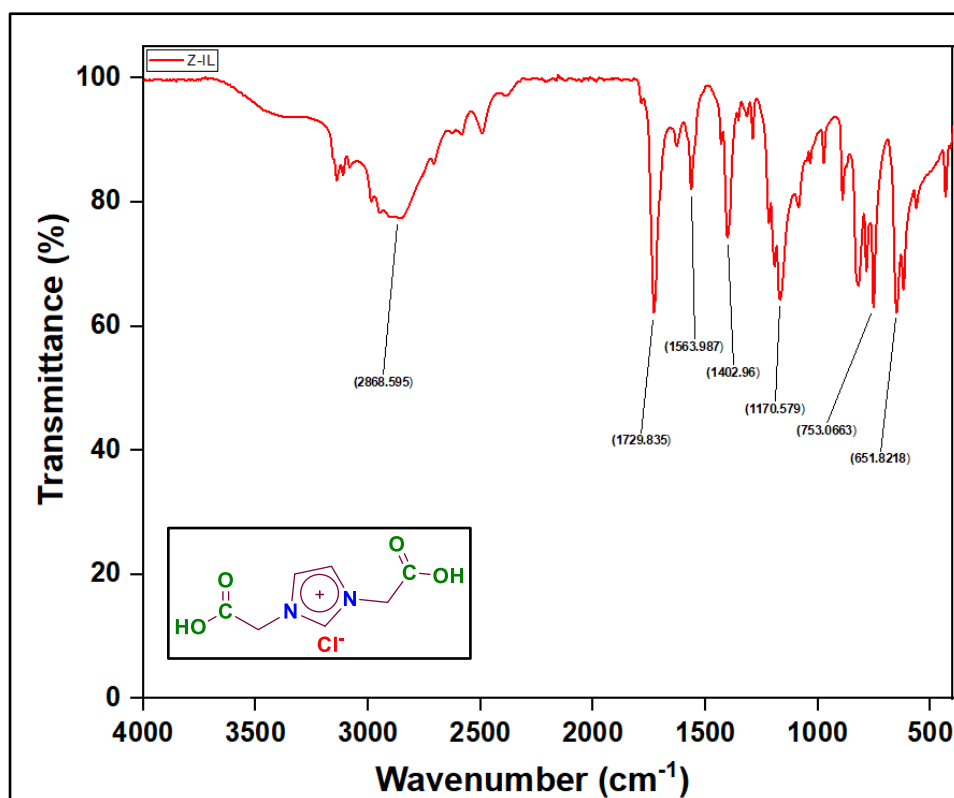

Fig. S4 FT-IR spectrum of 4.

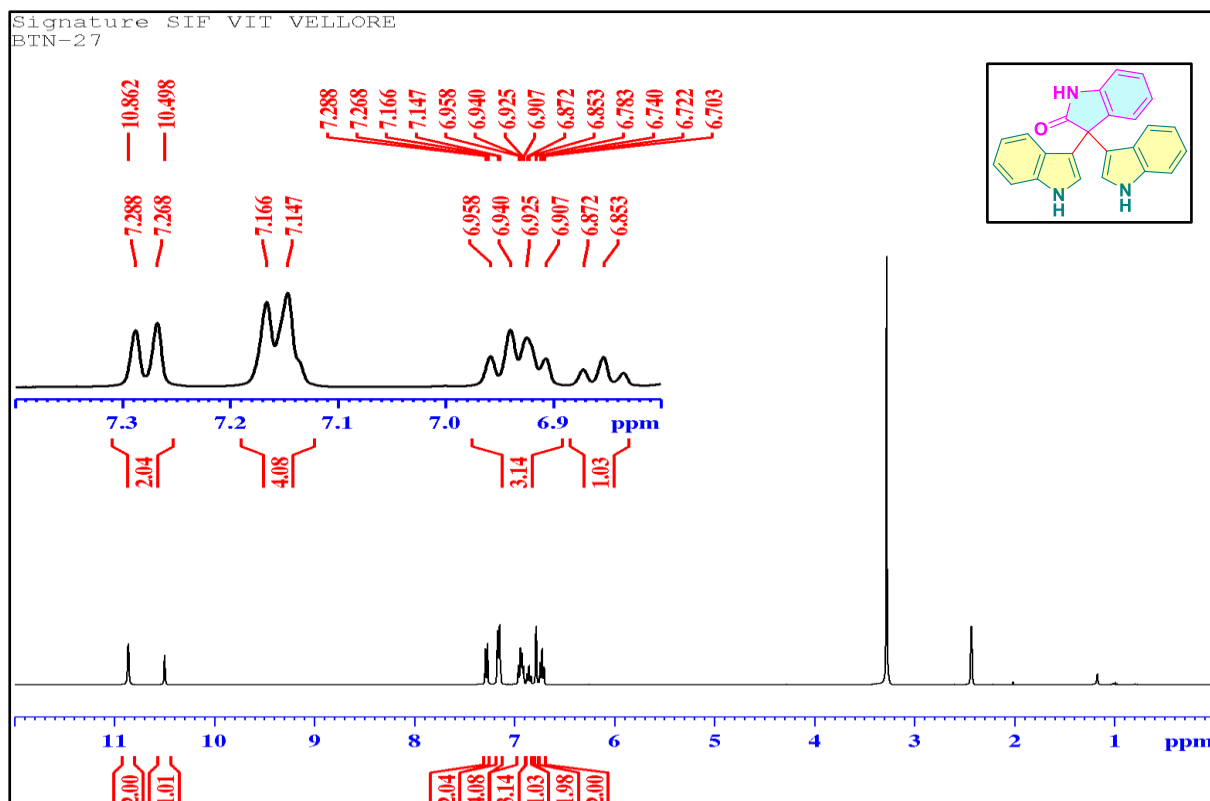

**Fig. S5** <sup>1</sup>H NMR spectrum (400 MHz) of **7aa** in DMSO-d<sub>6</sub>.

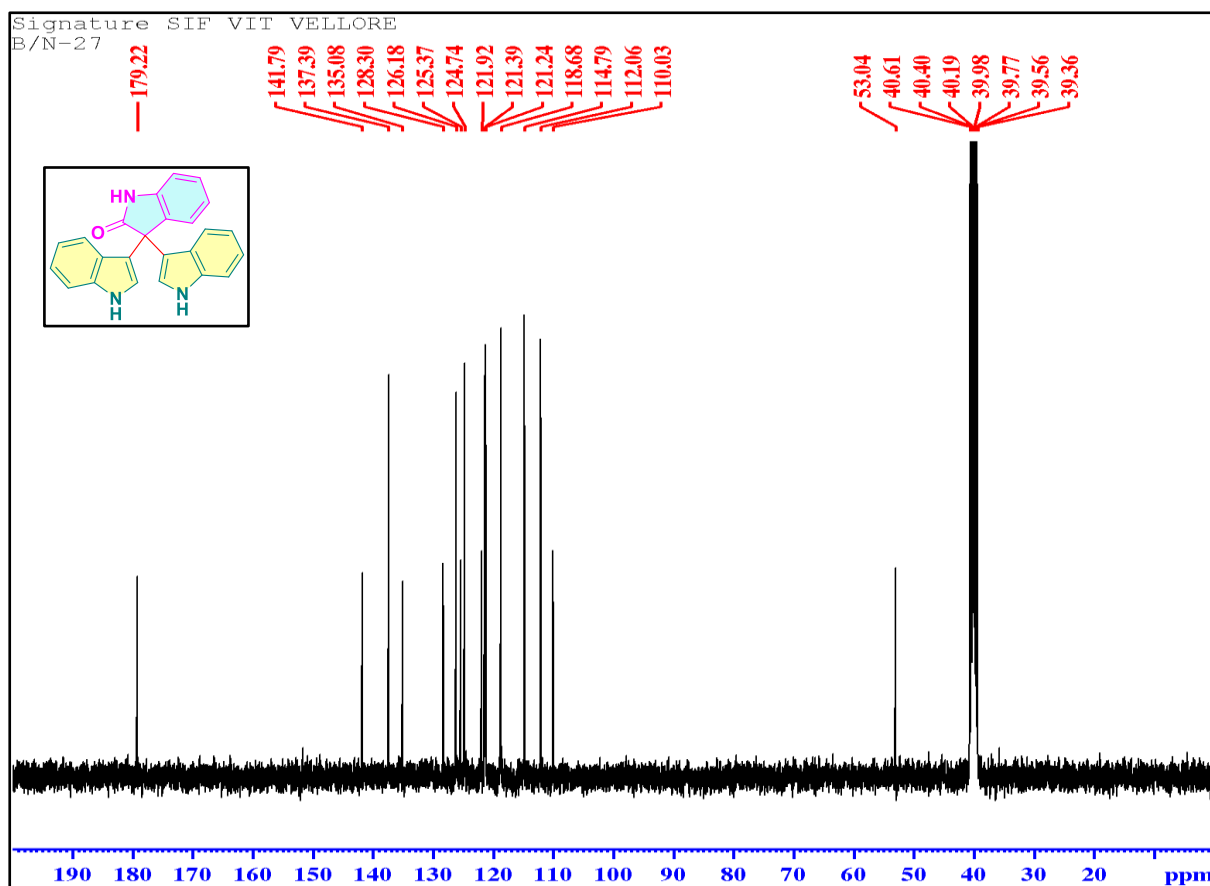

**Fig. S6** <sup>13</sup>C NMR spectrum (100 MHz) of **7aa** in DMSO-d<sub>6</sub>.

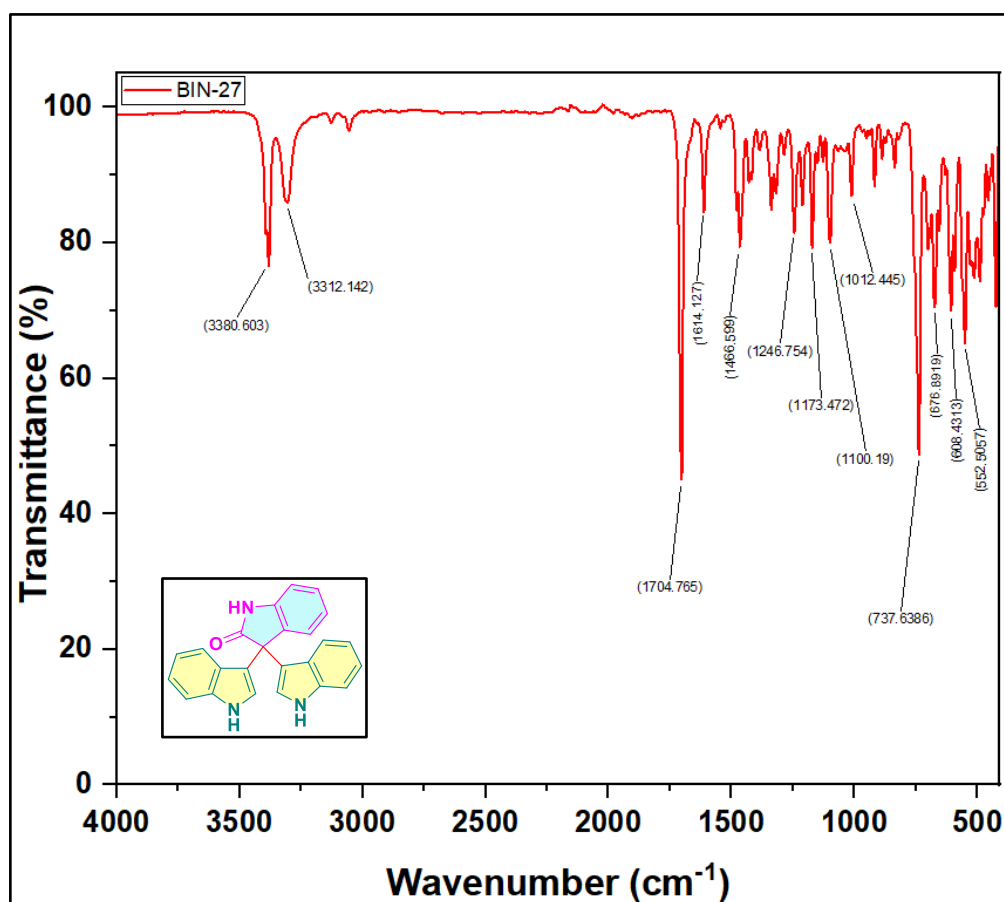

**Fig. S7** FT-IR spectrum of **7aa**.

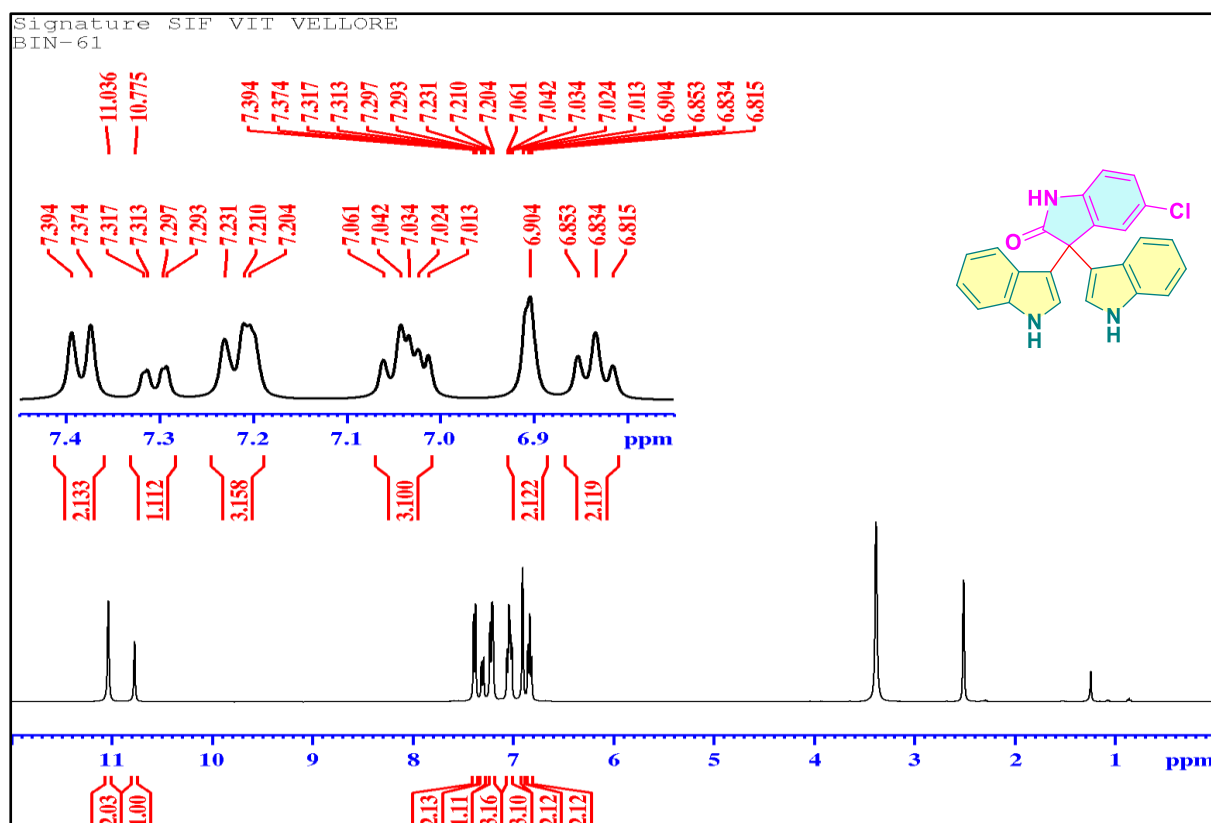

**Fig. S8** <sup>1</sup>H NMR spectrum (400 MHz) of **7ab** in DMSO-d<sub>6</sub>.

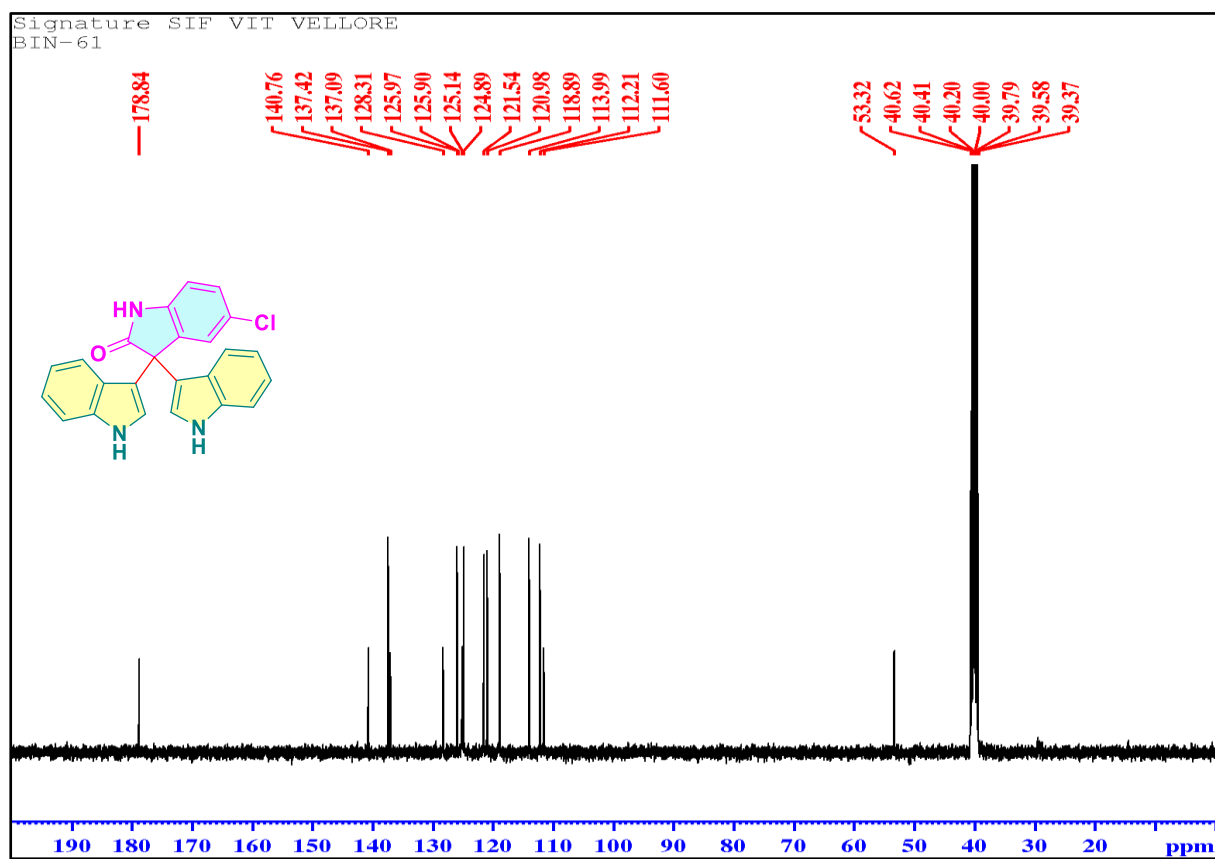

**Fig. S9** <sup>13</sup>C NMR spectrum (100 MHz) of **7ab** in DMSO-d<sub>6</sub>.

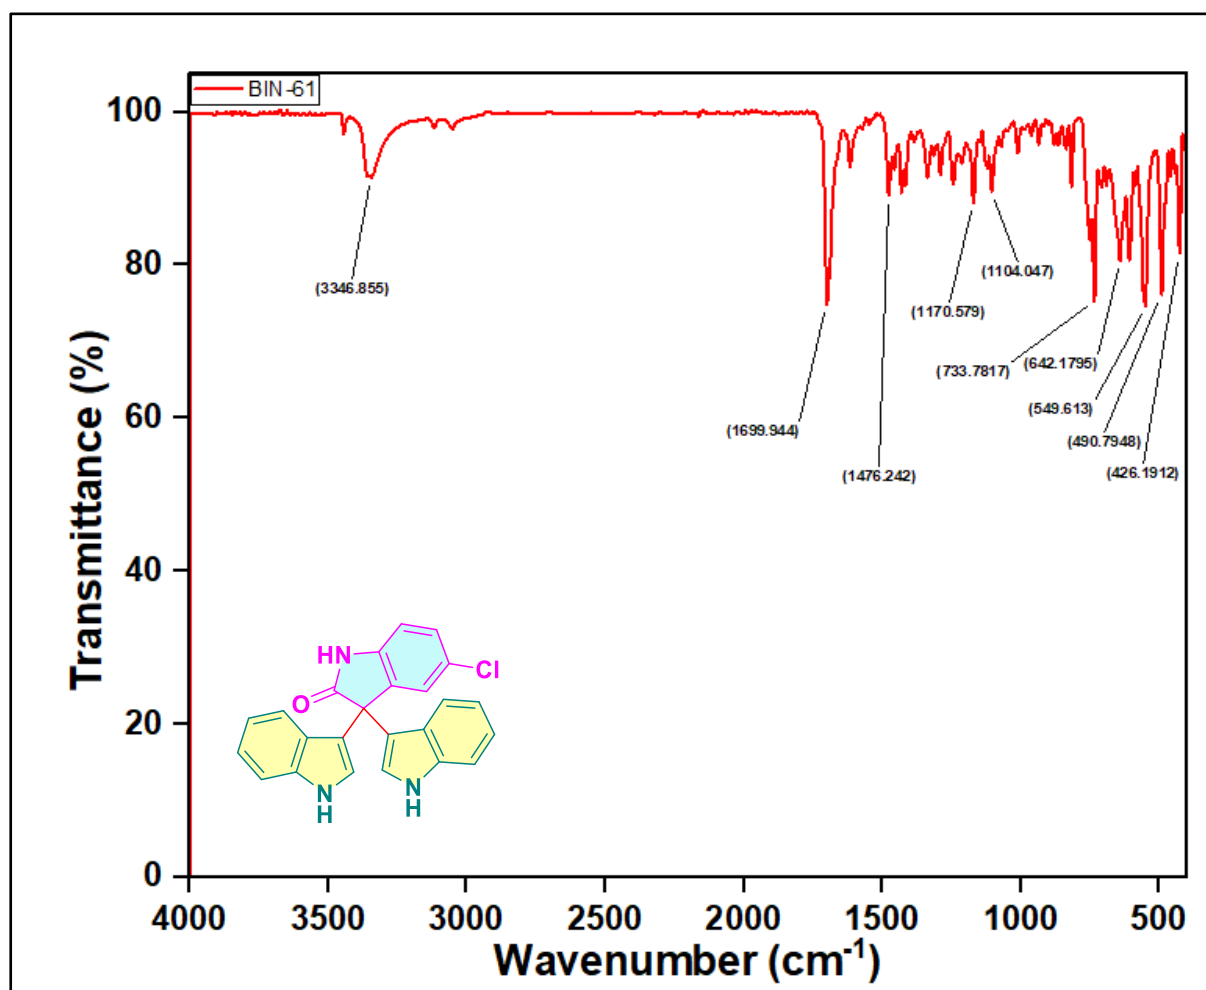

Fig. S10 FT-IR spectrum of 7ab.

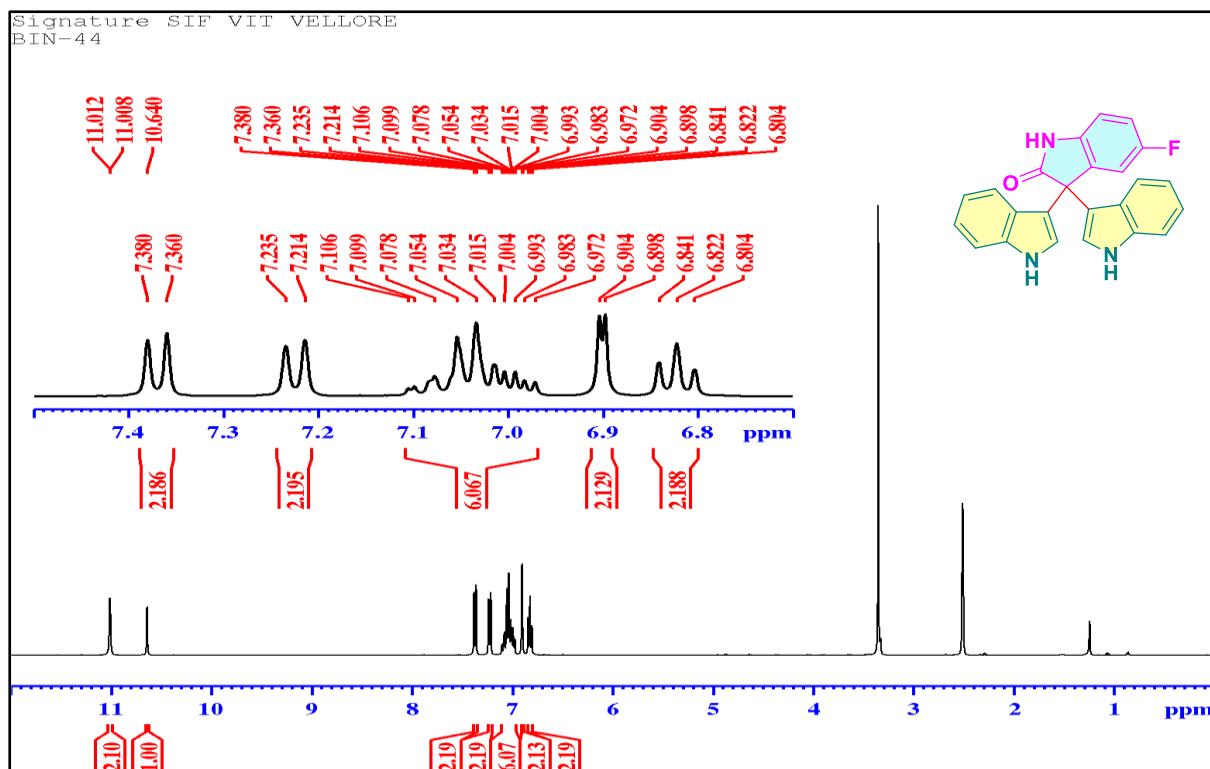

Fig. S11 <sup>1</sup>H NMR spectrum (400 MHz) of 7ac in DMSO-d<sub>6</sub>.

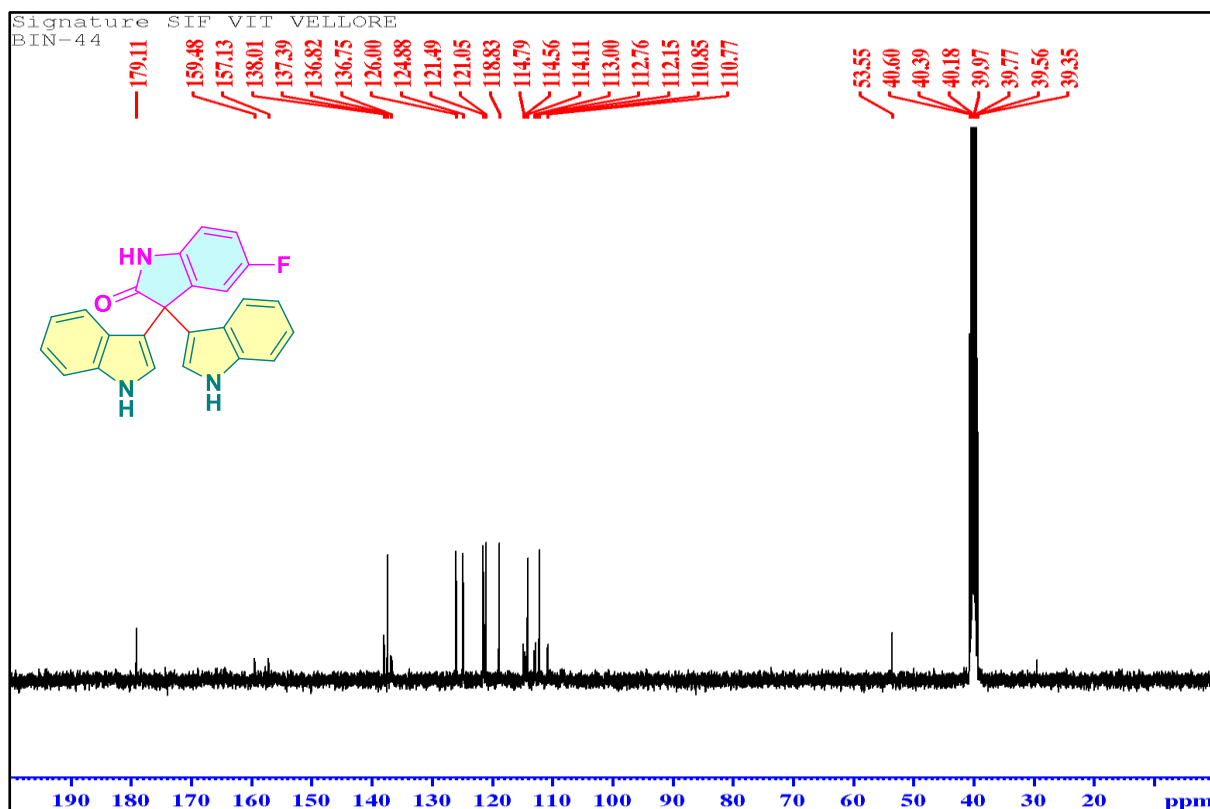

Fig. S12 <sup>13</sup>C NMR spectrum (100 MHz) of 7ac in DMSO-d<sub>6</sub>.

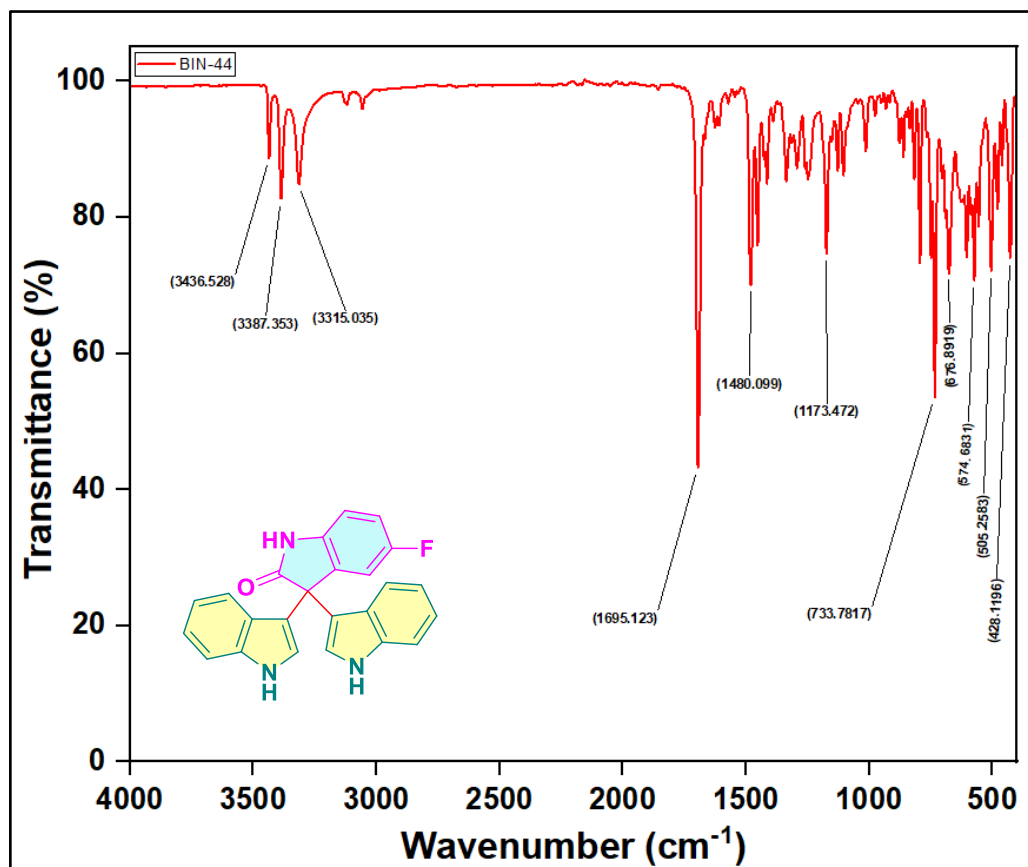

Fig. S13 FT-IR spectrum of 7ac.

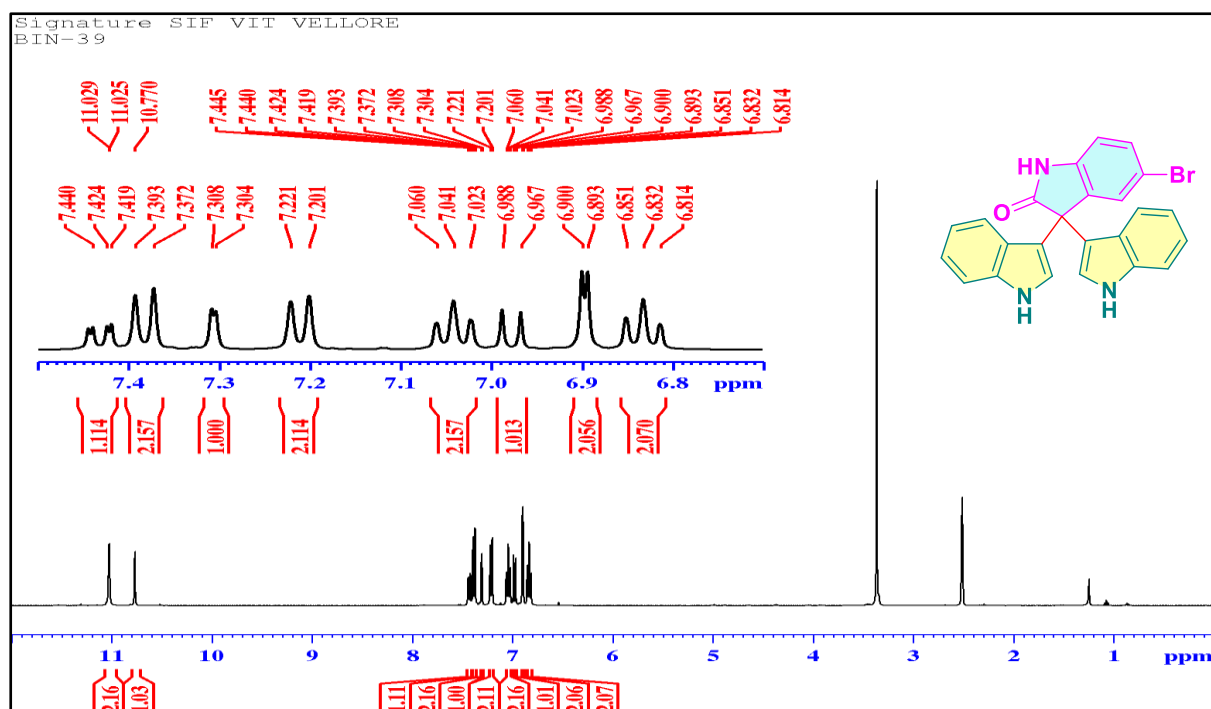

**Fig. S14** <sup>1</sup>H NMR spectrum (400 MHz) of **7ad** in DMSO-d<sub>6</sub>.

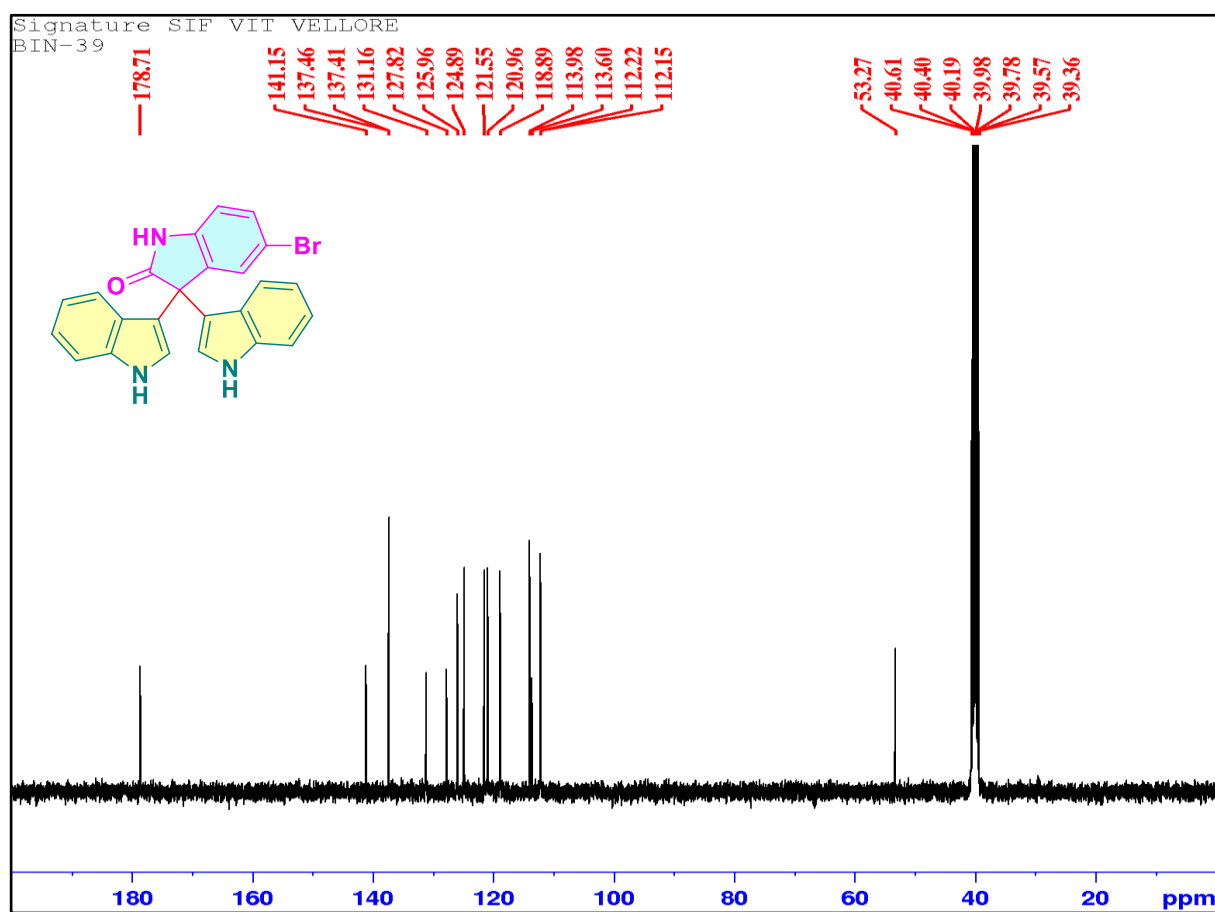

**Fig. S15** <sup>13</sup>C NMR spectrum (100 MHz) of **7ad** in DMSO-d<sub>6</sub>.

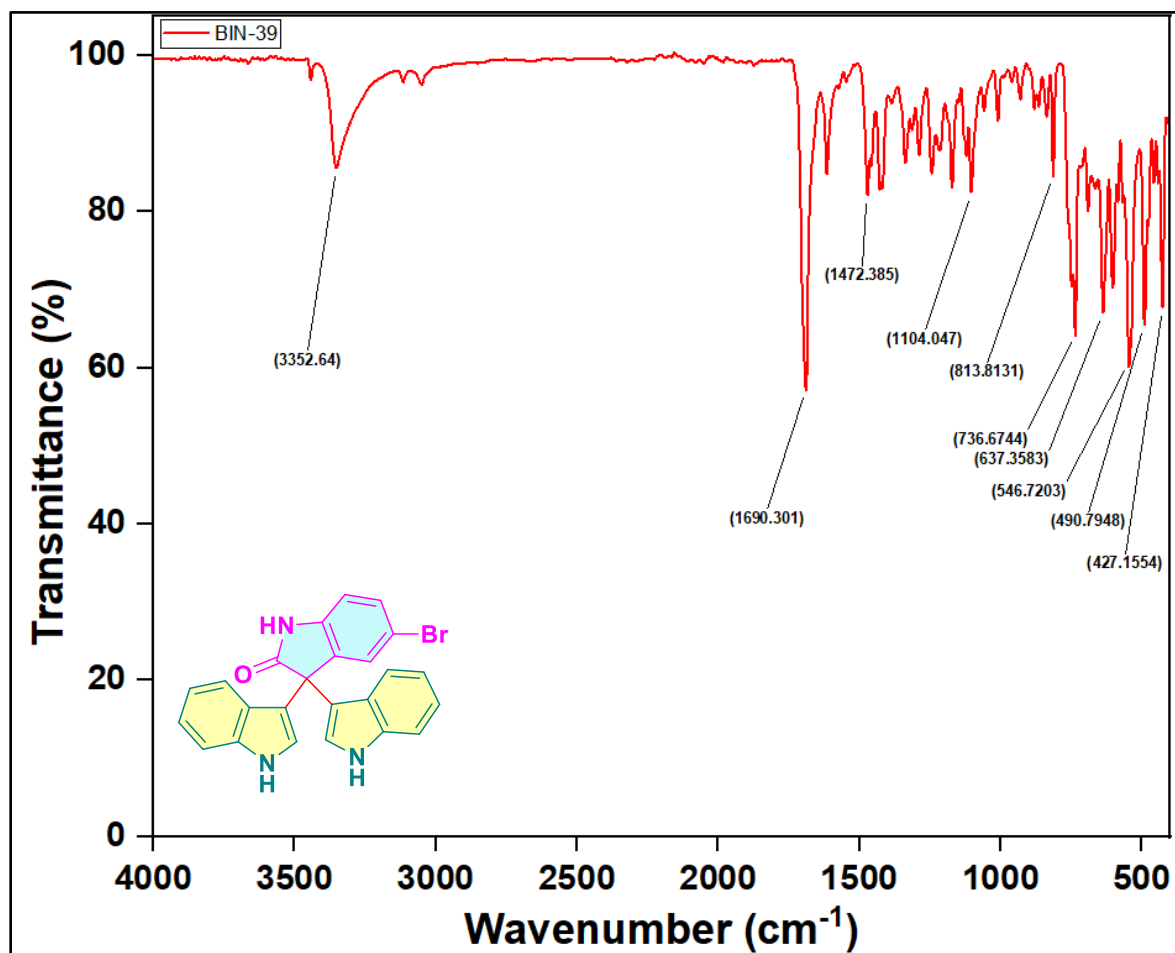

Fig. S16 FT-IR spectrum of 7ad.

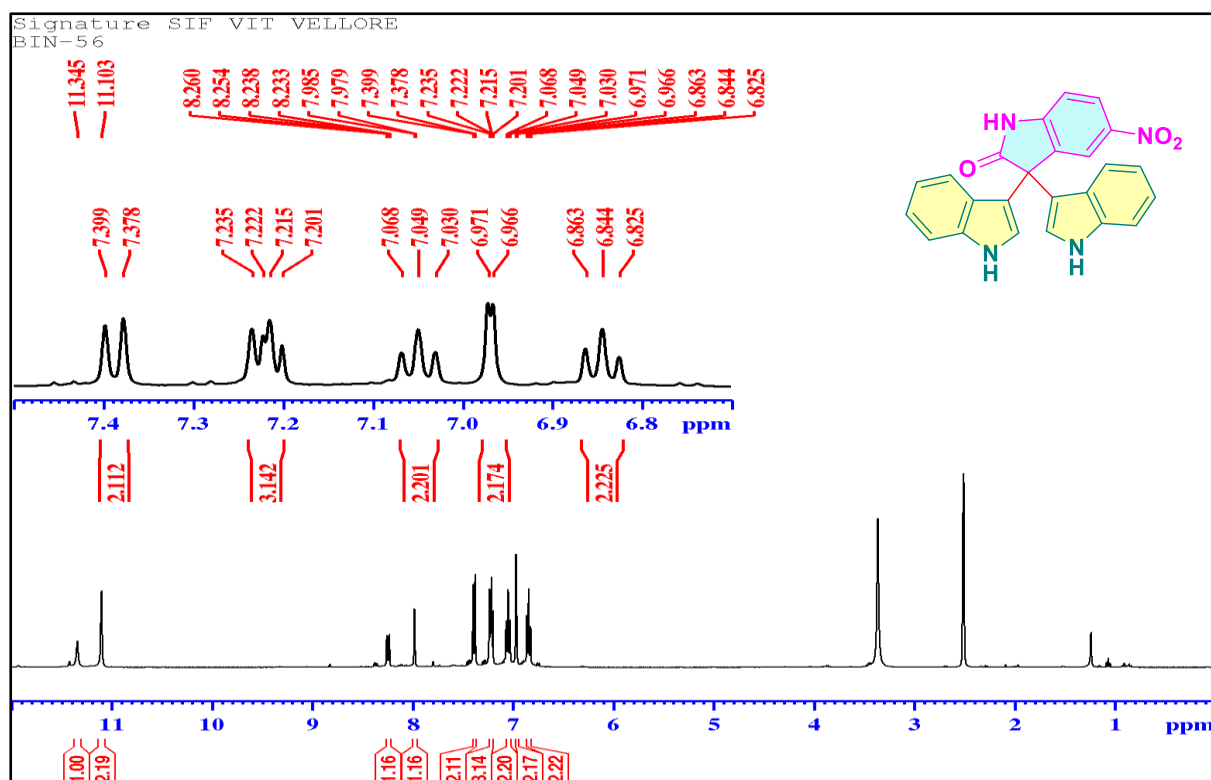

Fig. S17 <sup>1</sup>H NMR spectrum (400 MHz) of **7ae** in DMSO-d<sub>6</sub>.

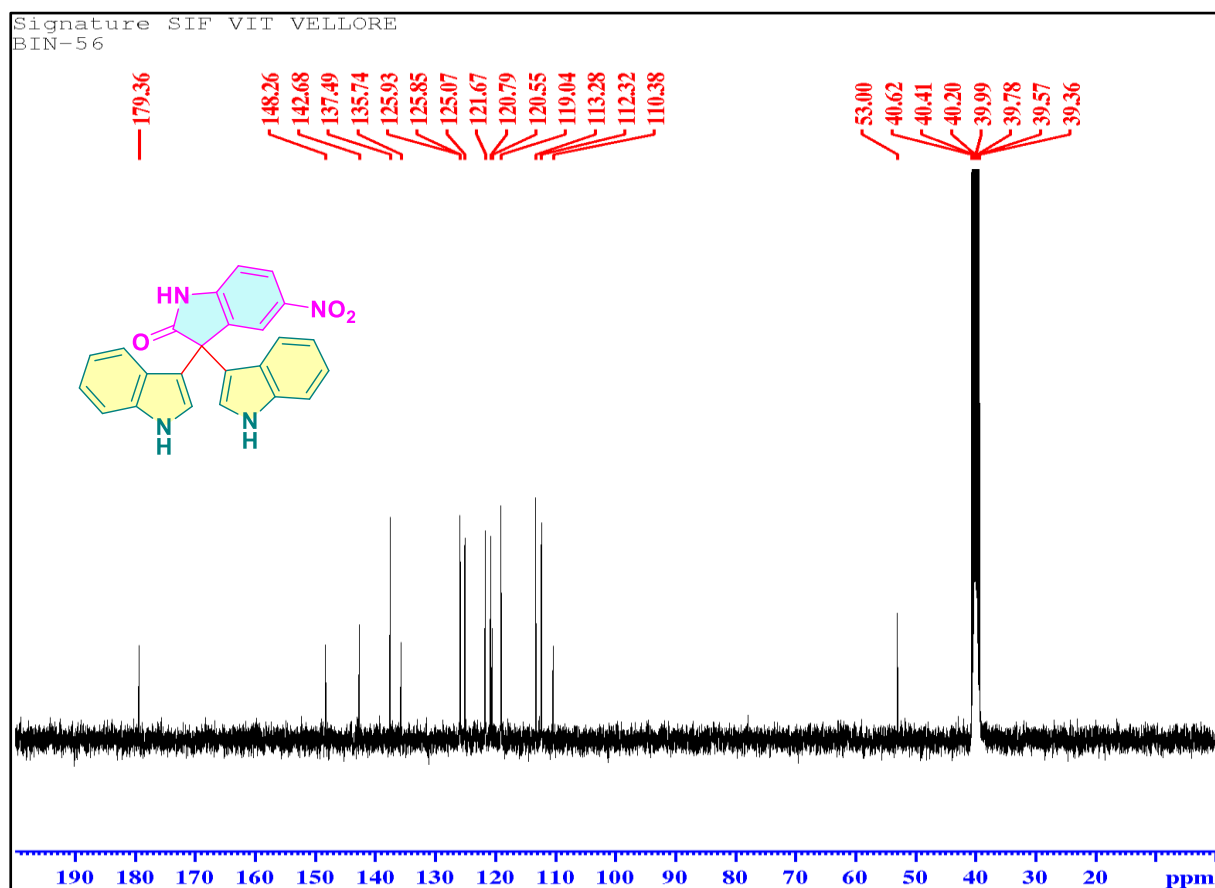

Fig. S18 <sup>13</sup>C NMR spectrum (100 MHz) of **7ae** in DMSO-d<sub>6</sub>.

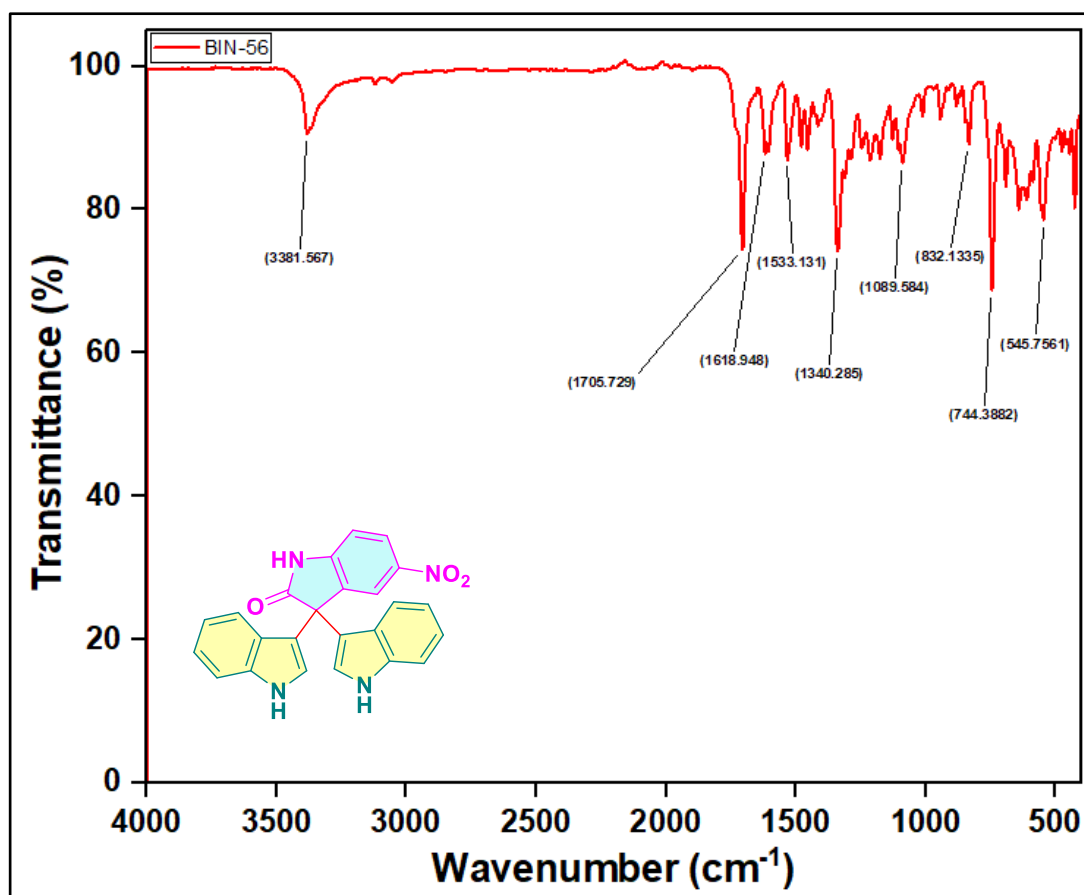

Fig. S19 FT-IR spectrum of 7ae.

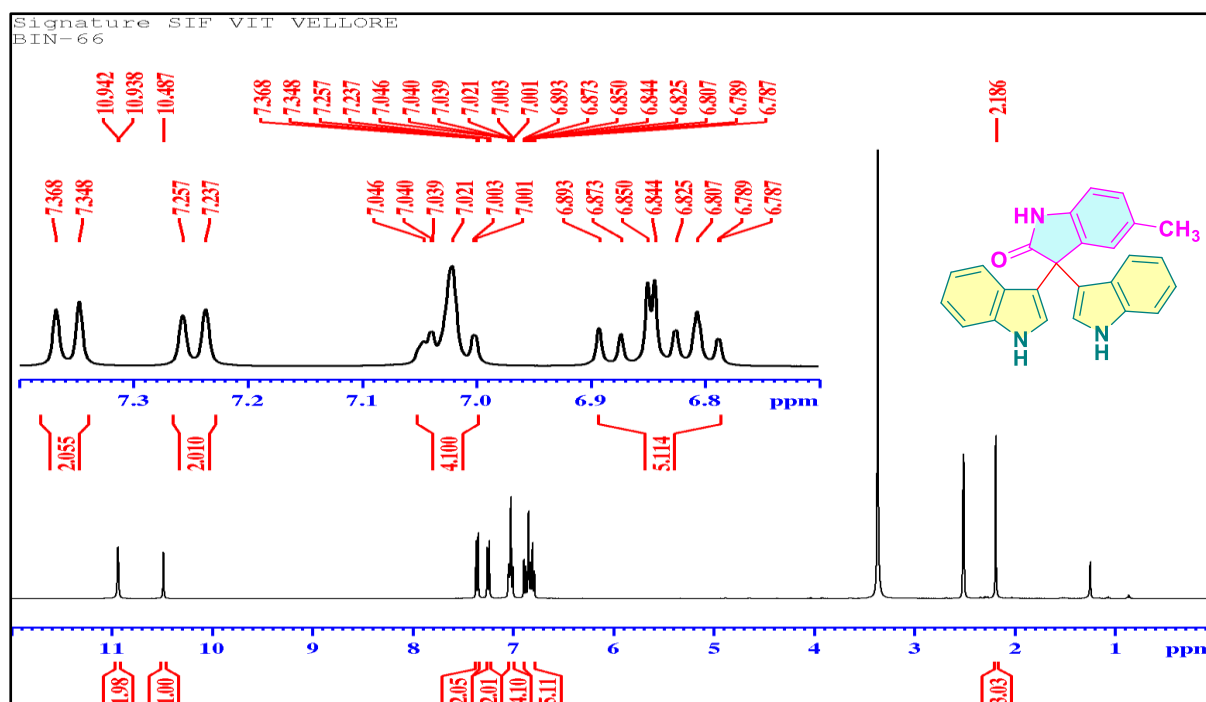

Fig. S20 <sup>1</sup>H NMR spectrum (400 MHz) of **7af** in DMSO-d<sub>6</sub>.

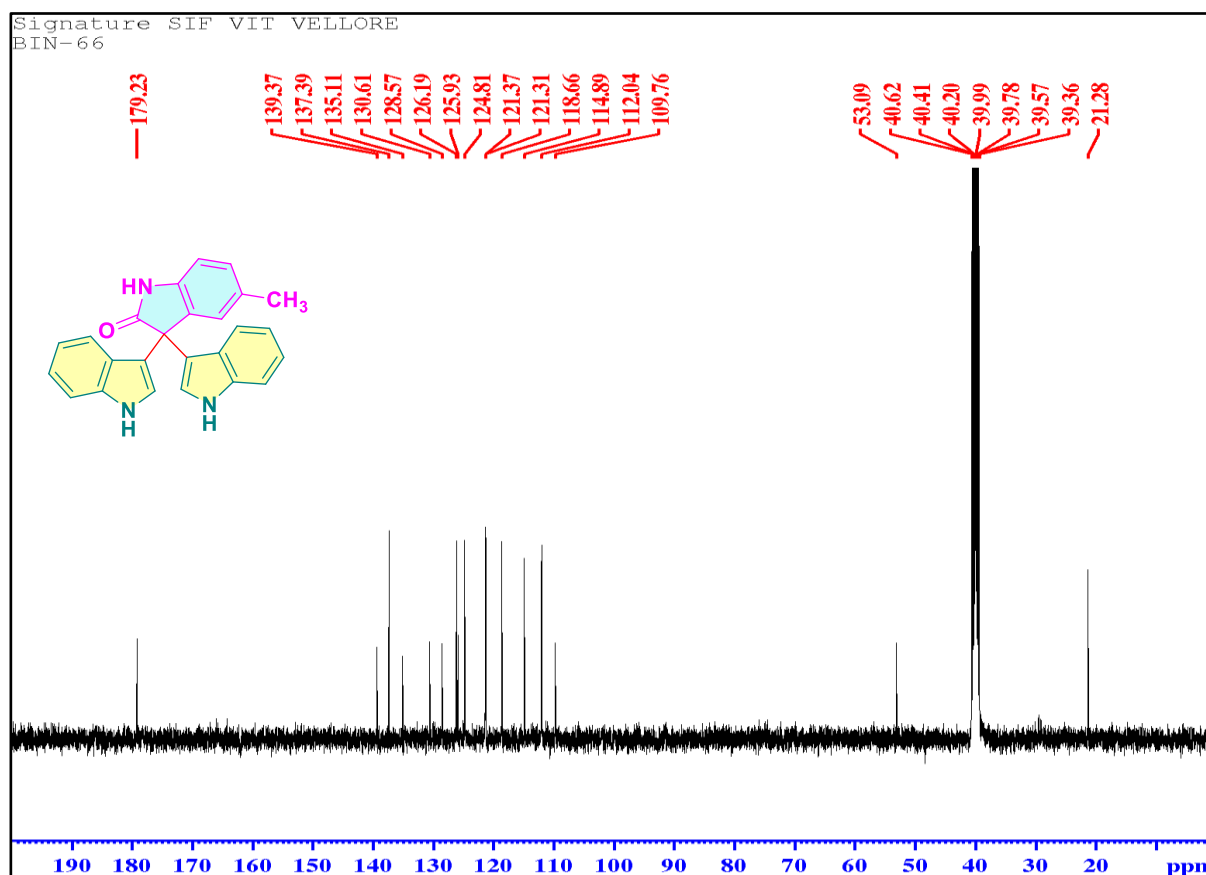

Fig. S21 <sup>13</sup>C NMR spectrum (100 MHz) of **7af** in DMSO-d<sub>6</sub>.

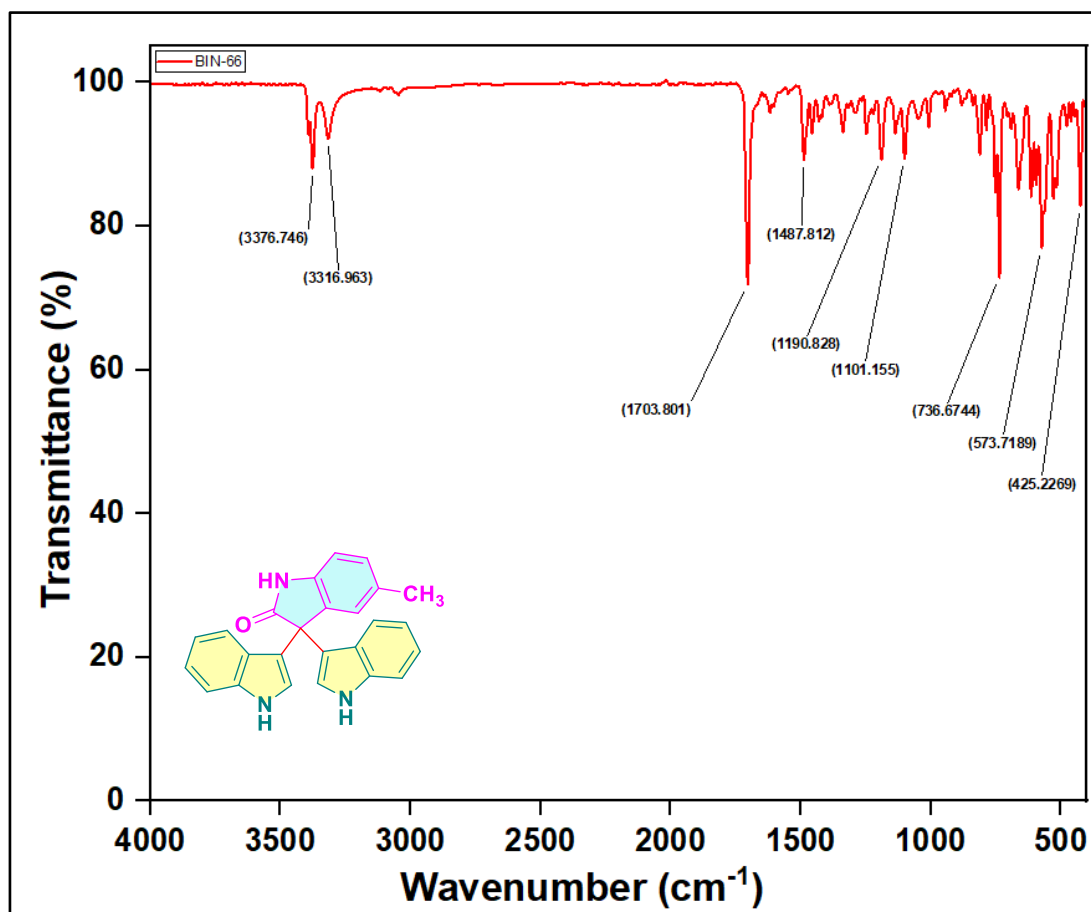

Fig. S22 FT-IR spectrum of 7af.

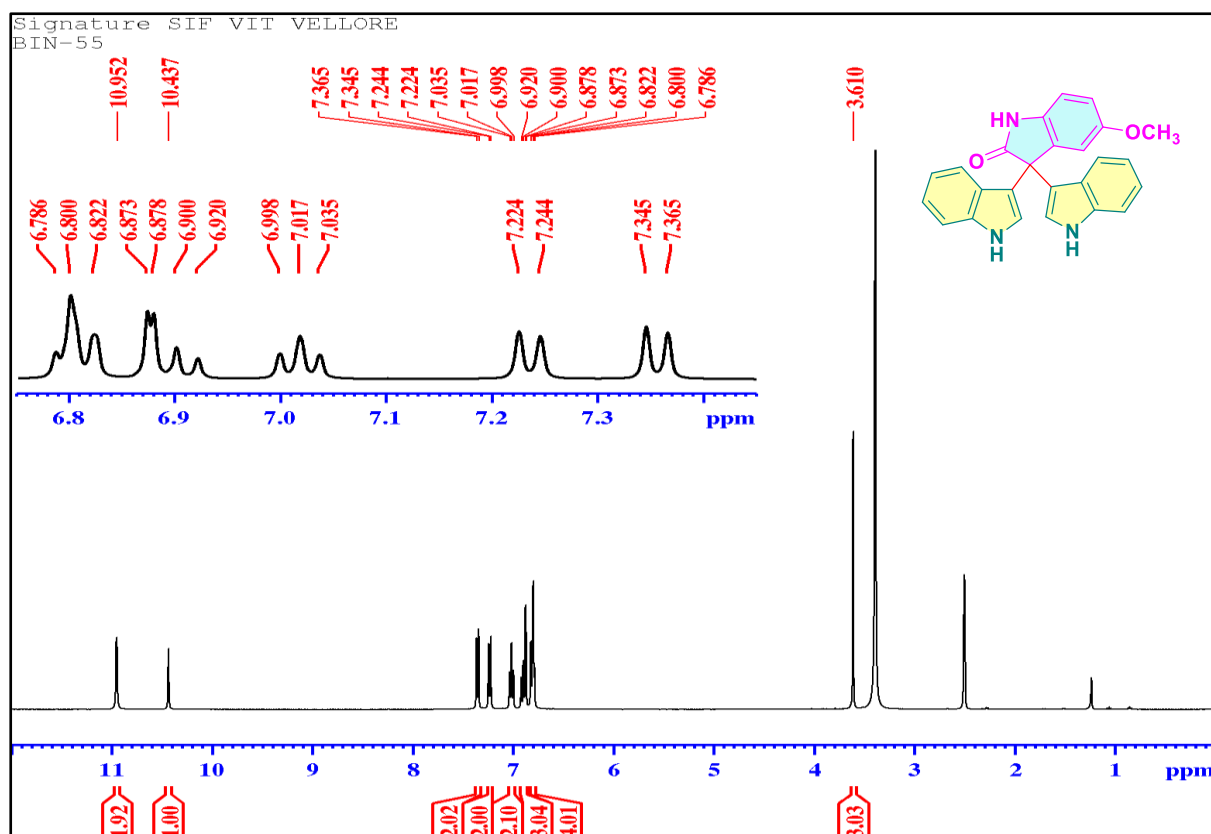

**Fig. S23** <sup>1</sup>H NMR spectrum (400 MHz) of **7ag** in DMSO-d<sub>6</sub>.

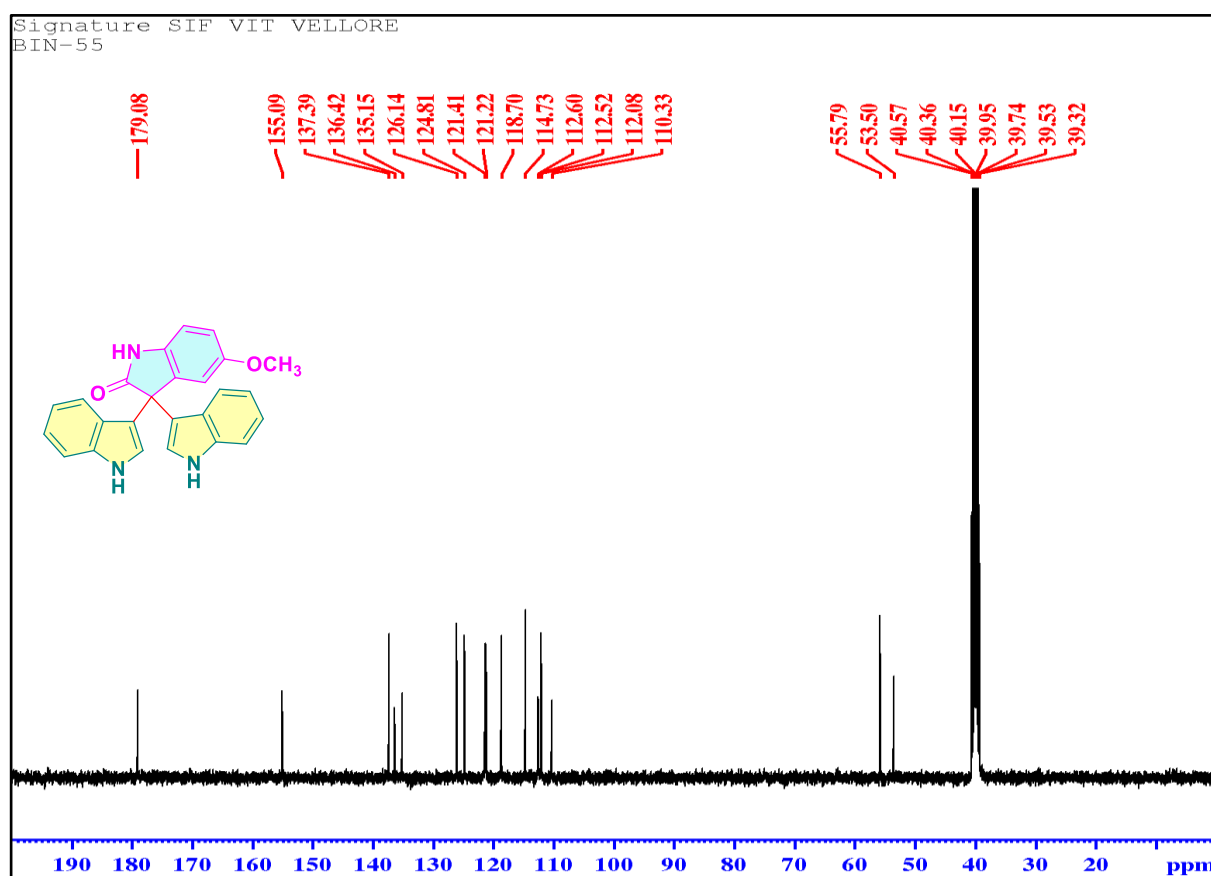

**Fig. S24** <sup>13</sup>C NMR spectrum (100 MHz) of **7ag** in DMSO-d<sub>6</sub>.

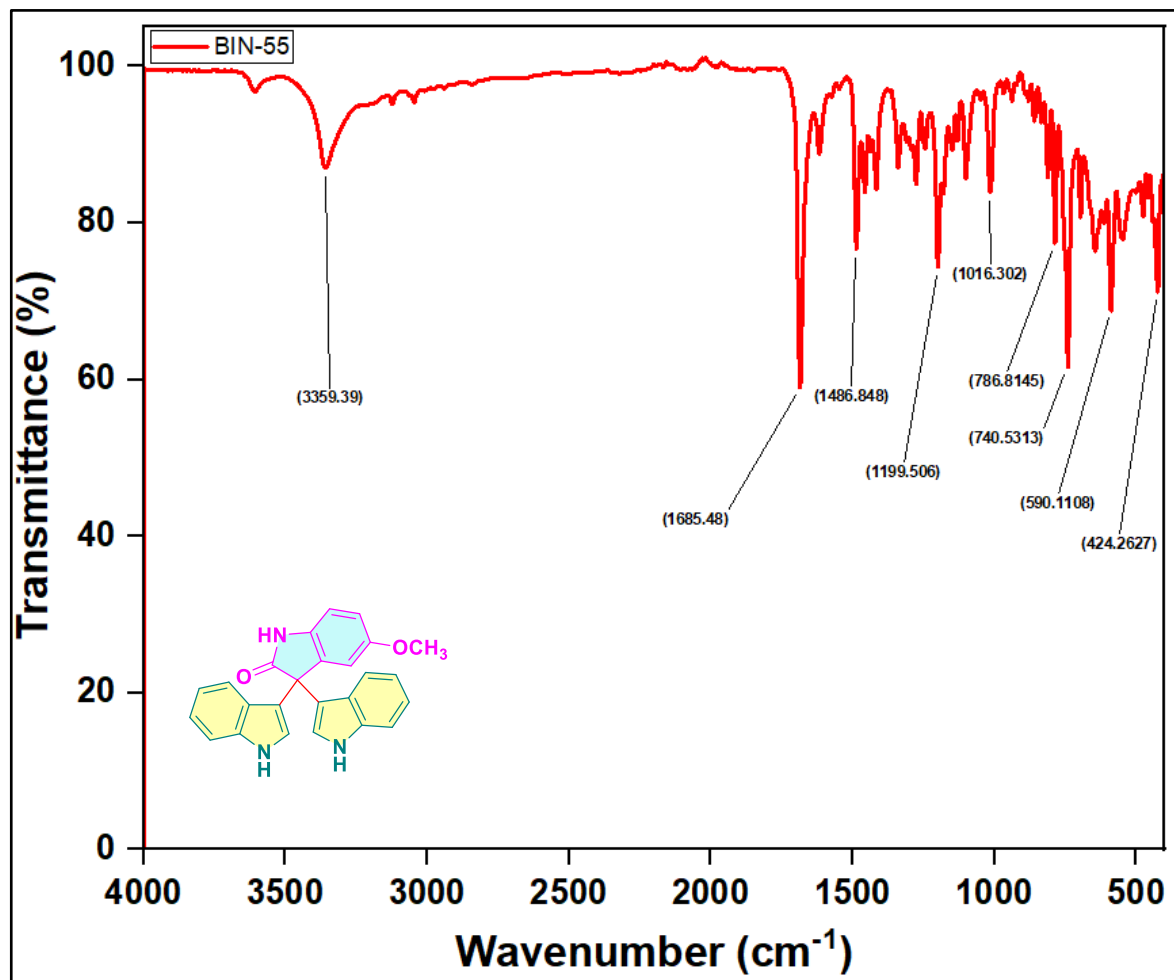

Fig. S25 FT-IR spectrum of 7ag.

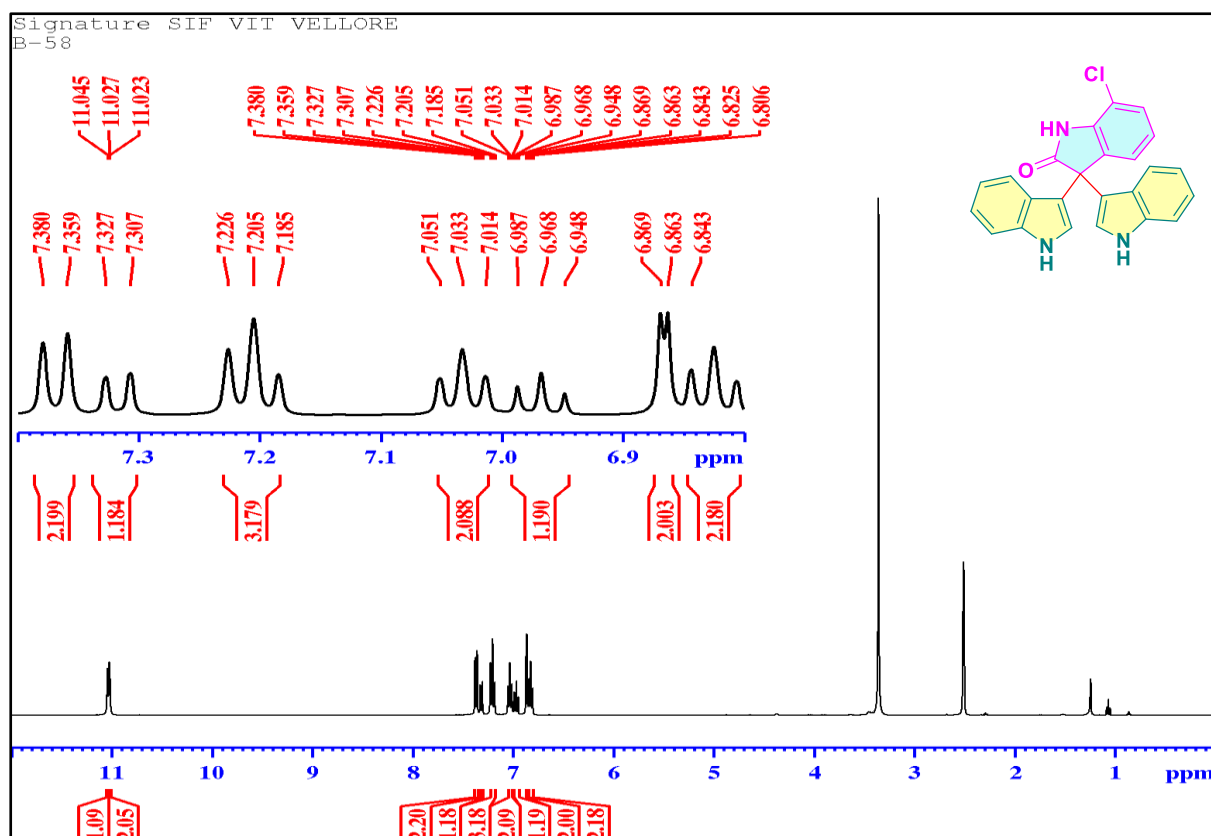

**Fig. S26** <sup>1</sup>H NMR spectrum (400 MHz) of **7ah** in DMSO-d<sub>6</sub>.

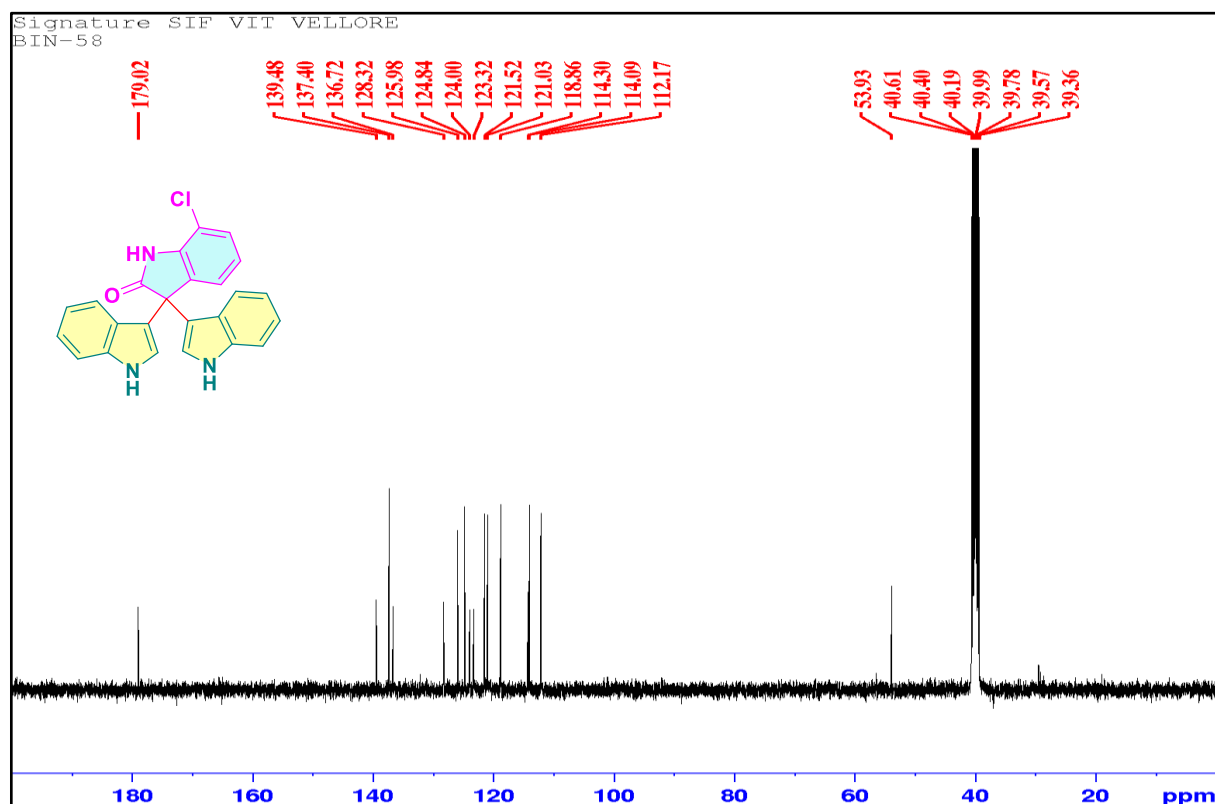

**Fig. S27** <sup>13</sup>C NMR spectrum (100 MHz) of **7ah** in DMSO-d<sub>6</sub>.

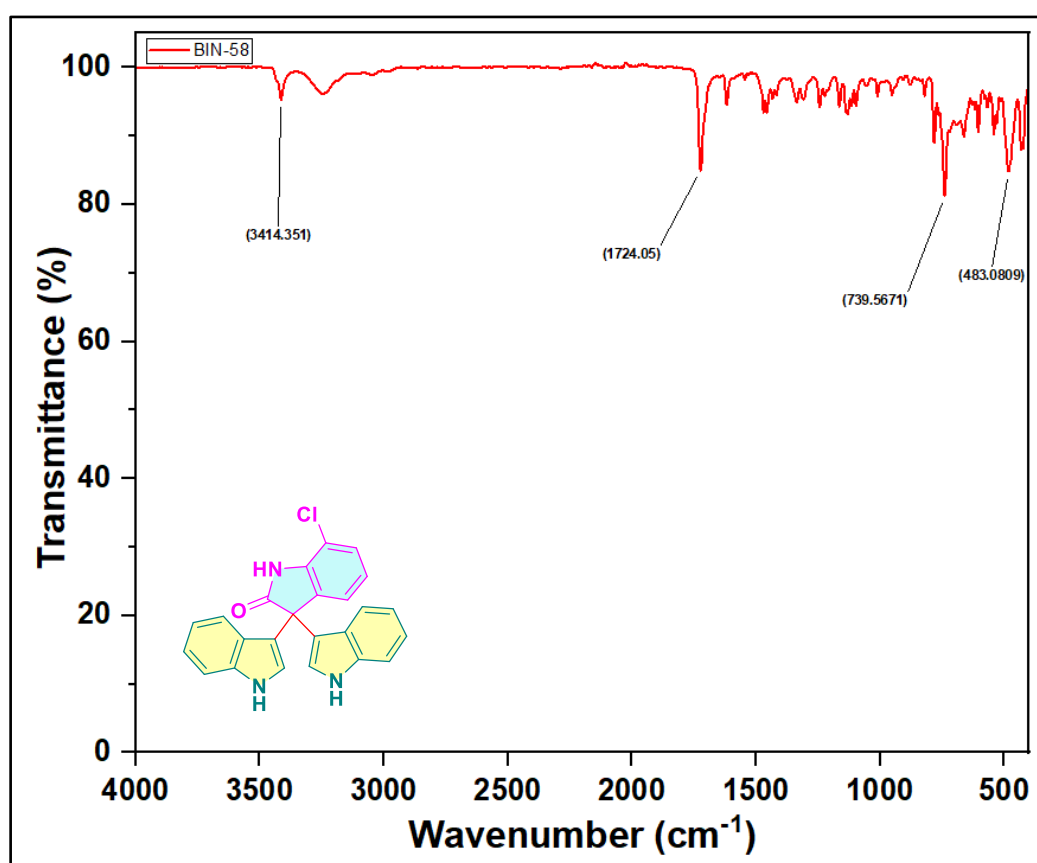

Fig. S28 FT-IR spectrum of 7ah.

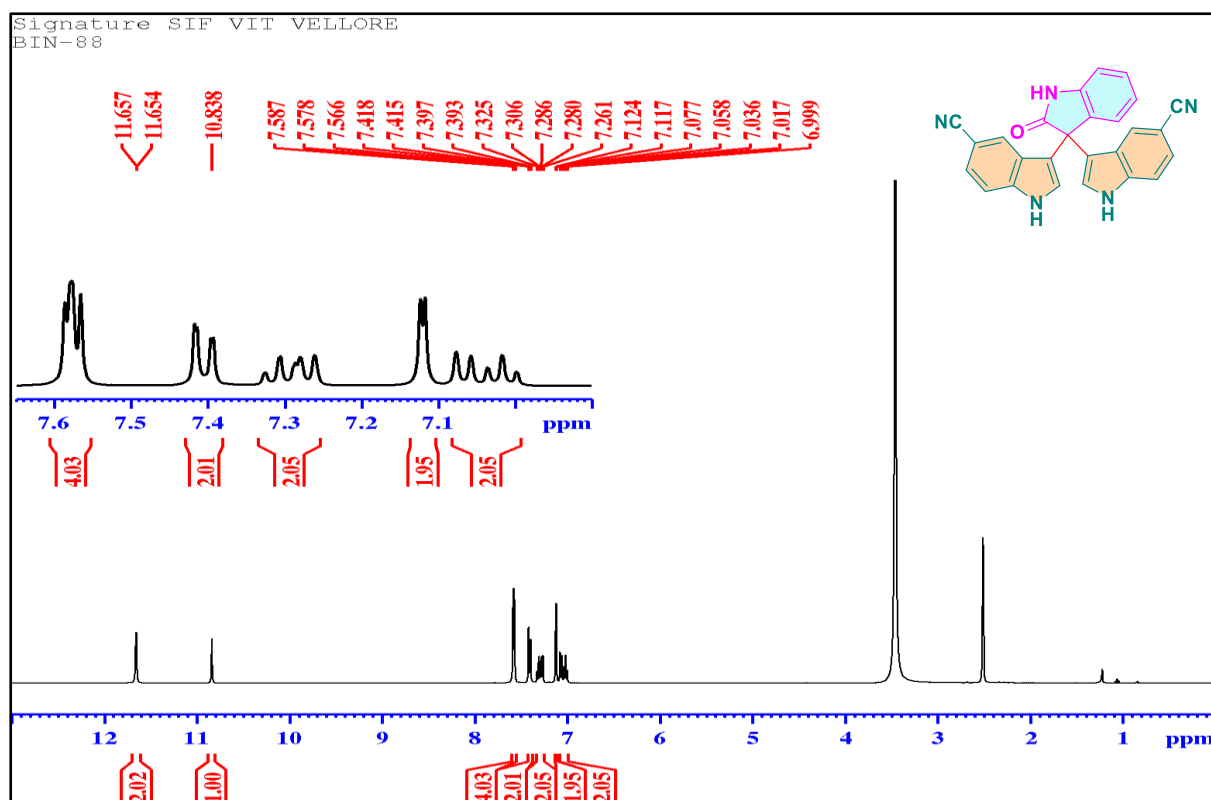

Fig. S29 <sup>1</sup>H NMR spectrum (400 MHz) of **7ba** in DMSO-d<sub>6</sub>.

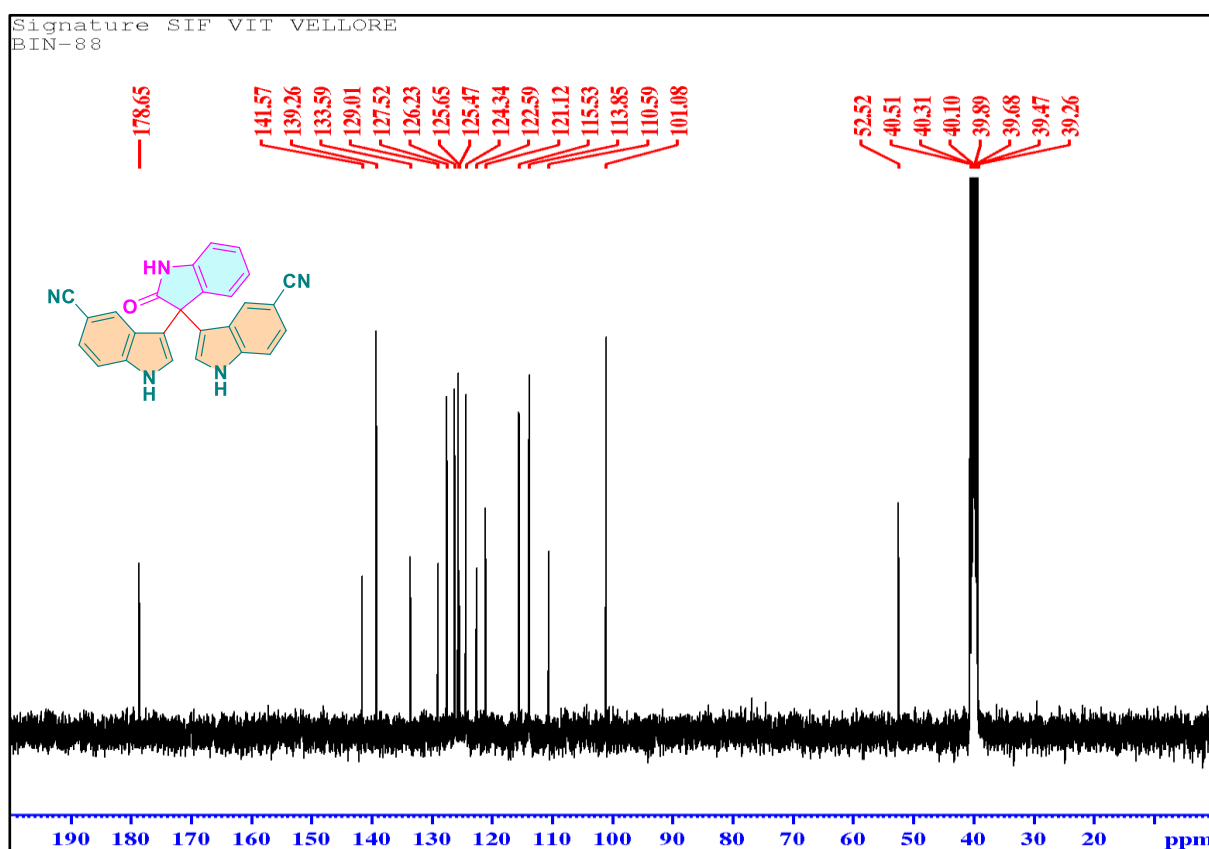

Fig. S30 <sup>13</sup>C NMR spectrum (100 MHz) of **7ba** in DMSO-d<sub>6</sub>.

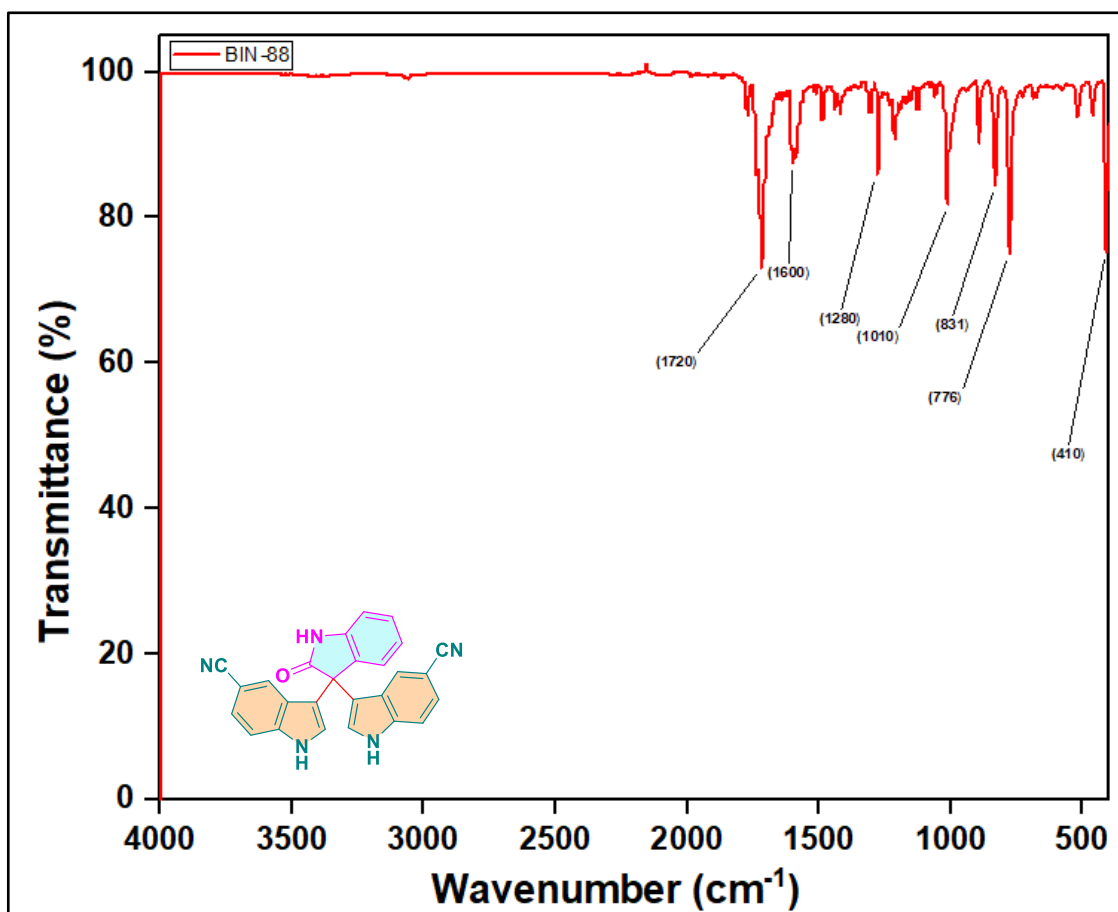

Fig. S31 FT-IR spectrum of **7ba**.

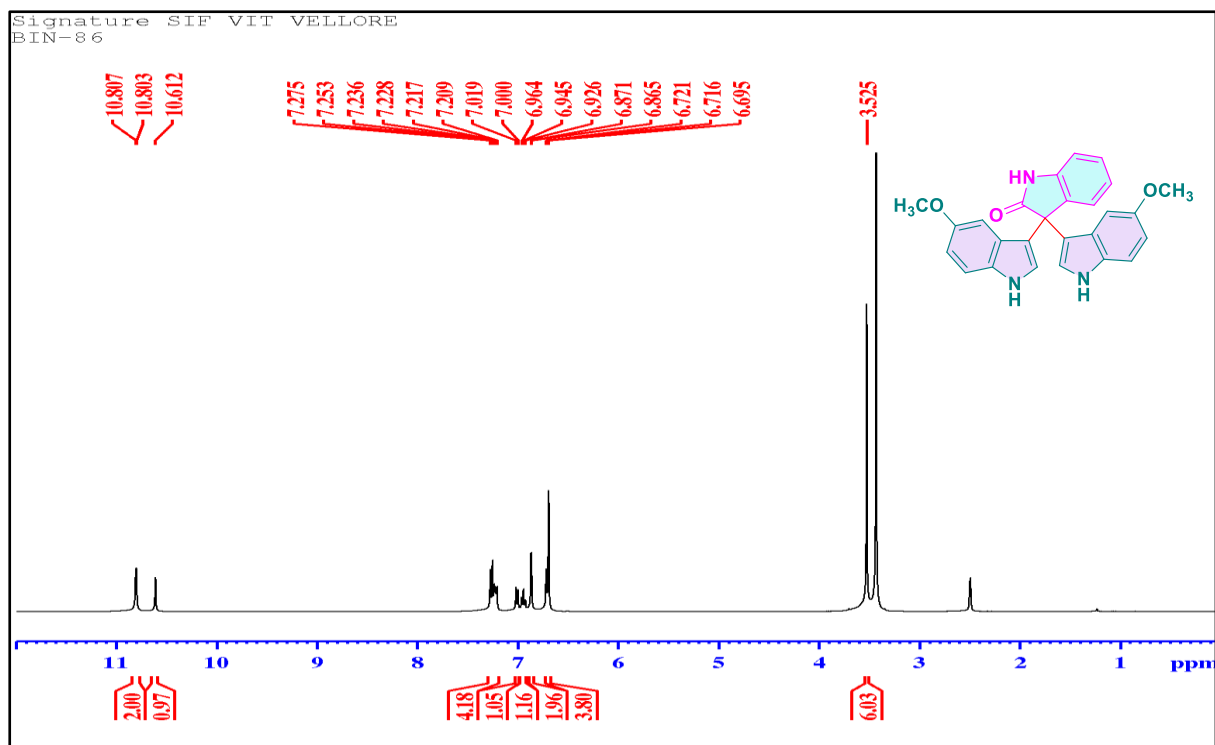

**Fig. S32**  $^1\text{H}$  NMR spectrum (400 MHz) of **7ca** in  $\text{DMSO-d}_6$ .

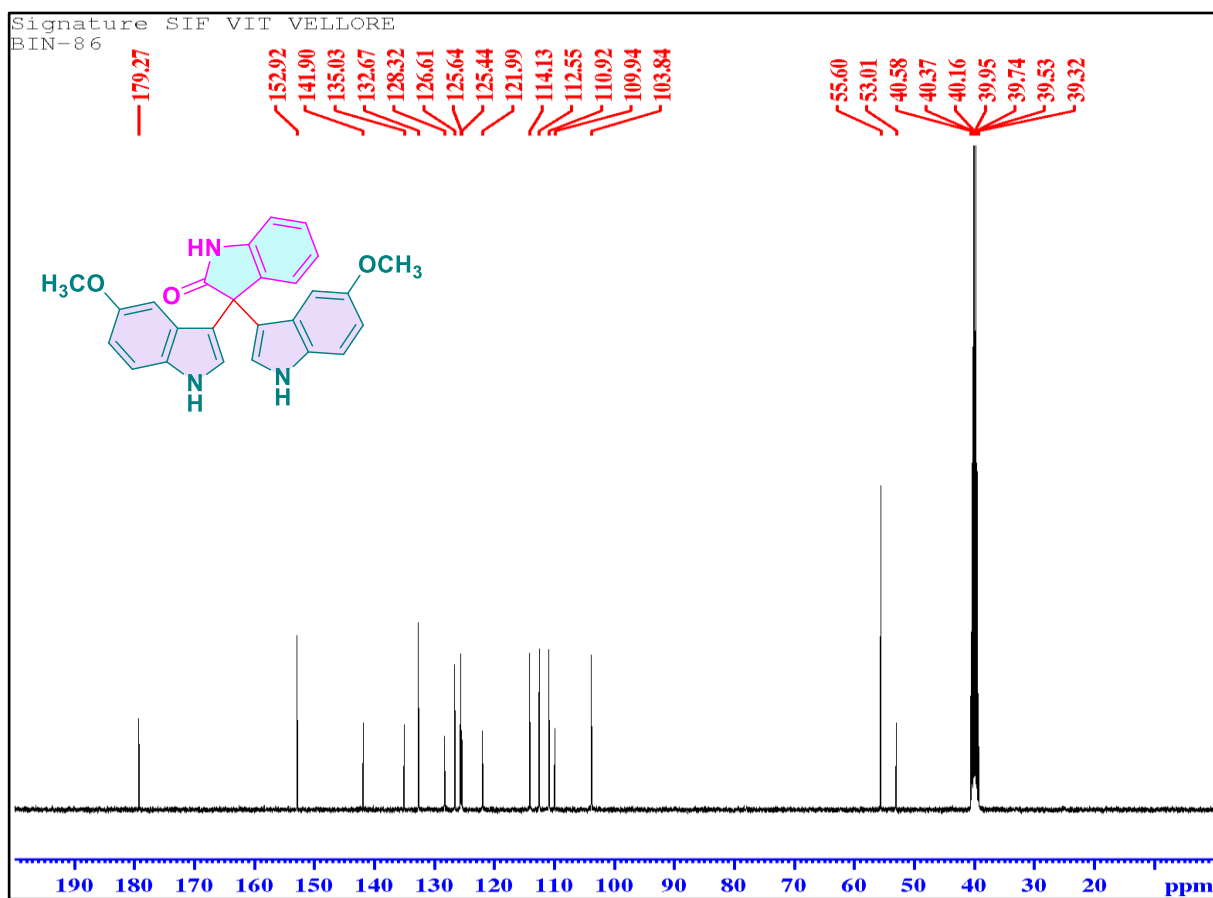

**Fig. S33**  $^{13}\text{C}$  NMR spectrum (100 MHz) of **7ca** in  $\text{DMSO-d}_6$ .

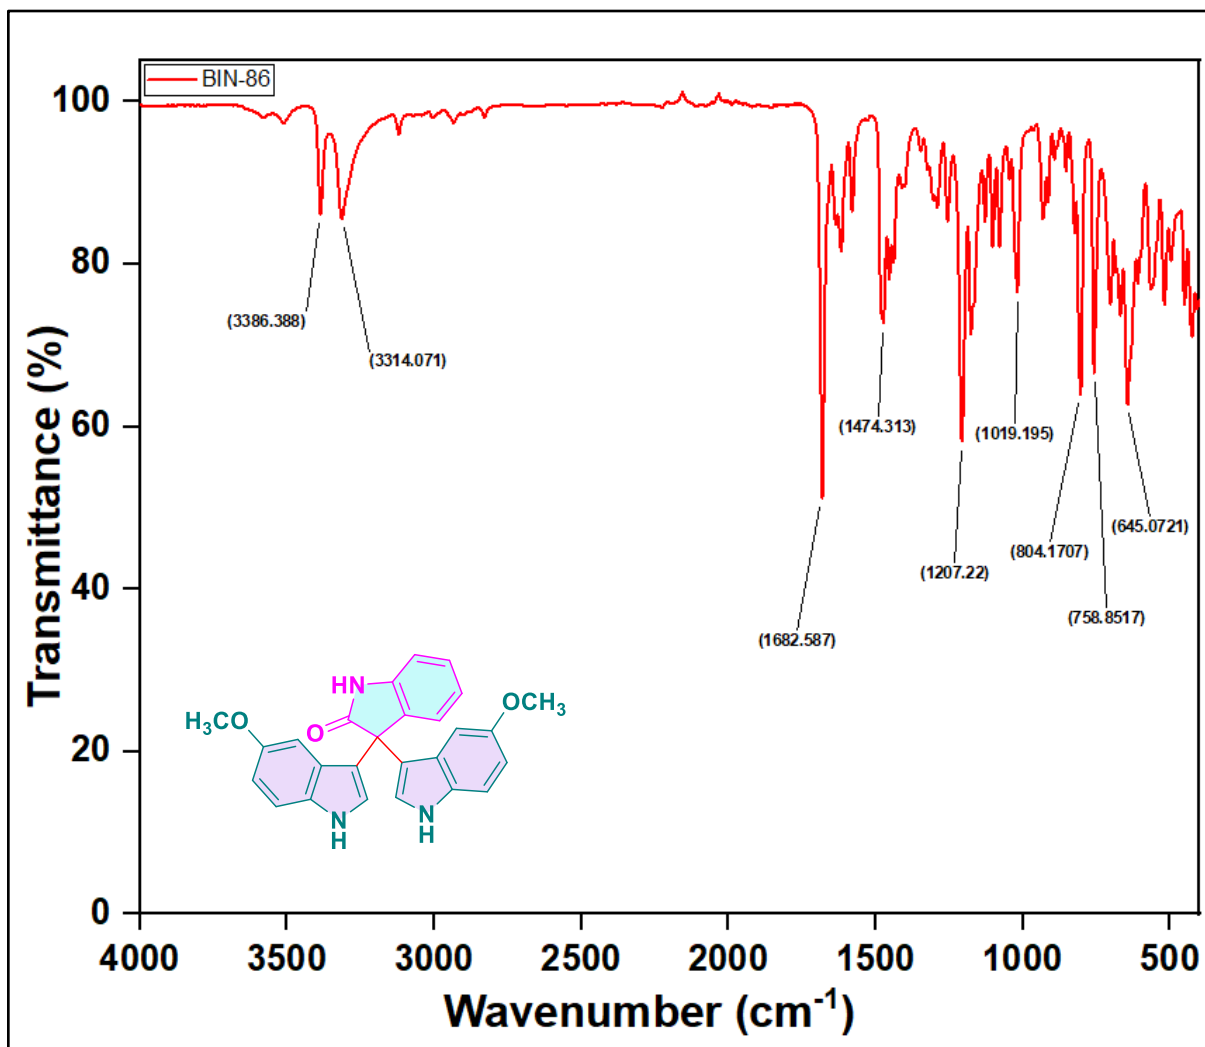

Fig. S34 FT-IR spectrum of 7ca.

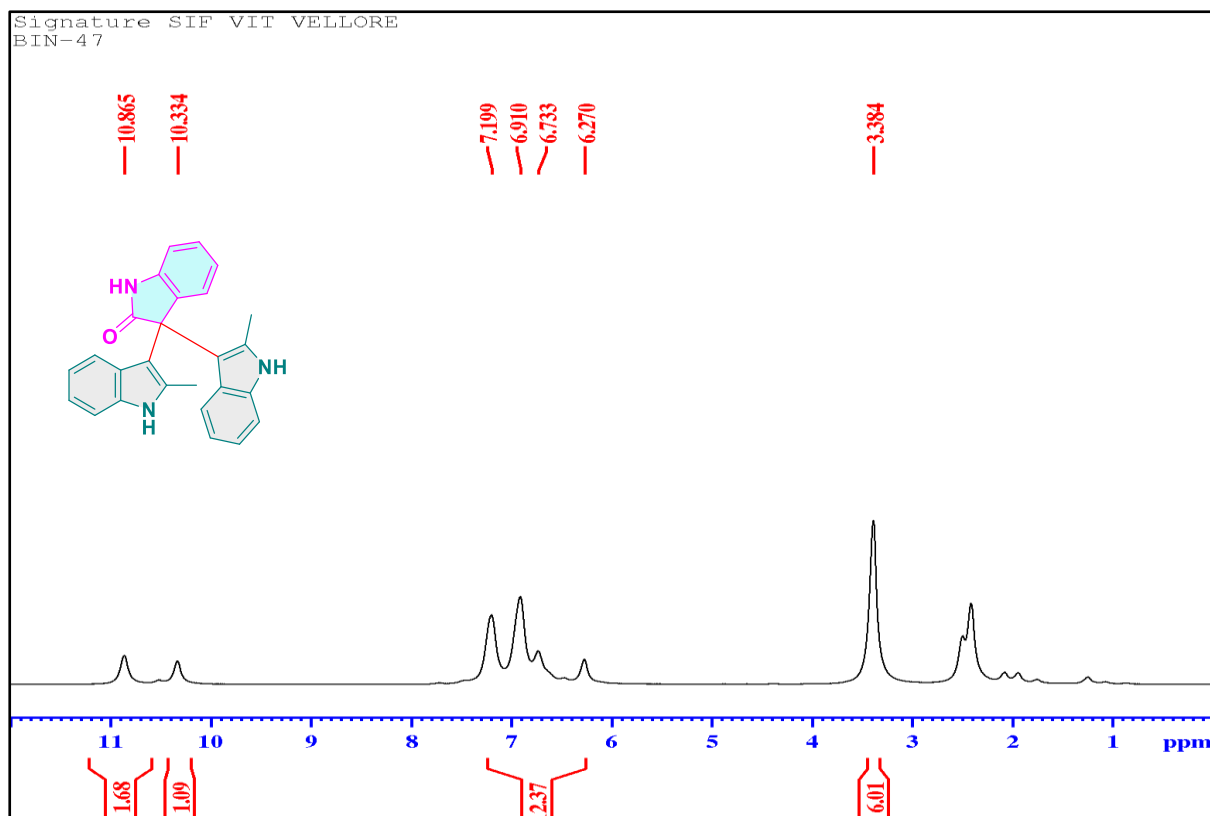

**Fig. S35** <sup>1</sup>H NMR spectrum (400 MHz) of **7da** in DMSO-d<sub>6</sub>.

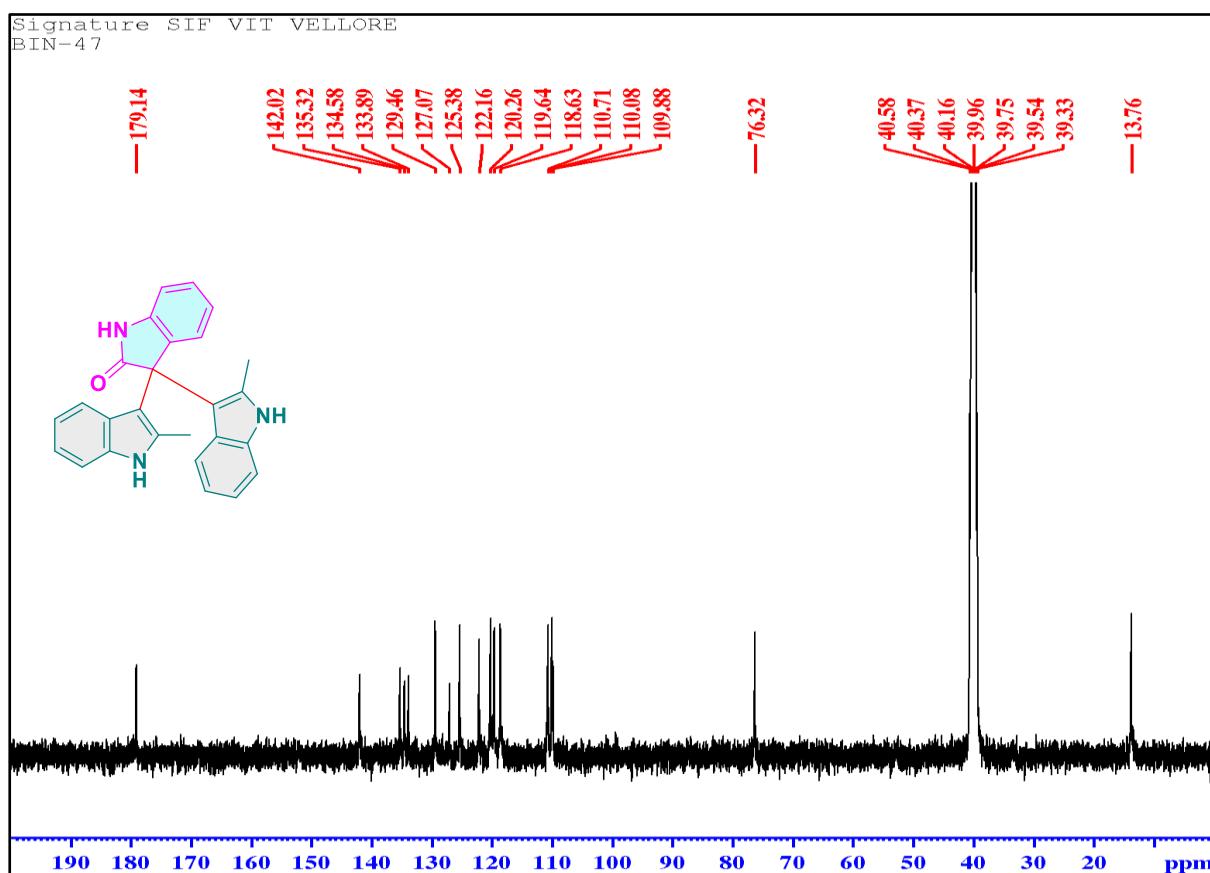

**Fig. S36** <sup>13</sup>C NMR spectrum (100 MHz) of **7da** in DMSO-d<sub>6</sub>.

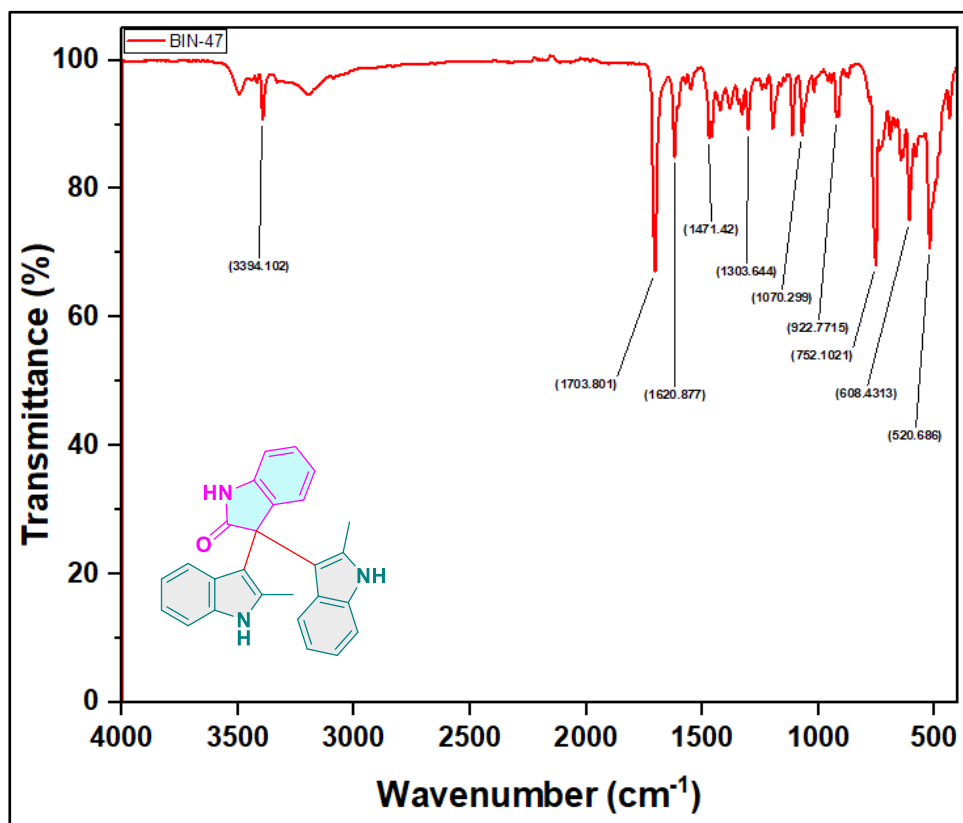

Fig. S37 FT-IR spectrum of 7da.

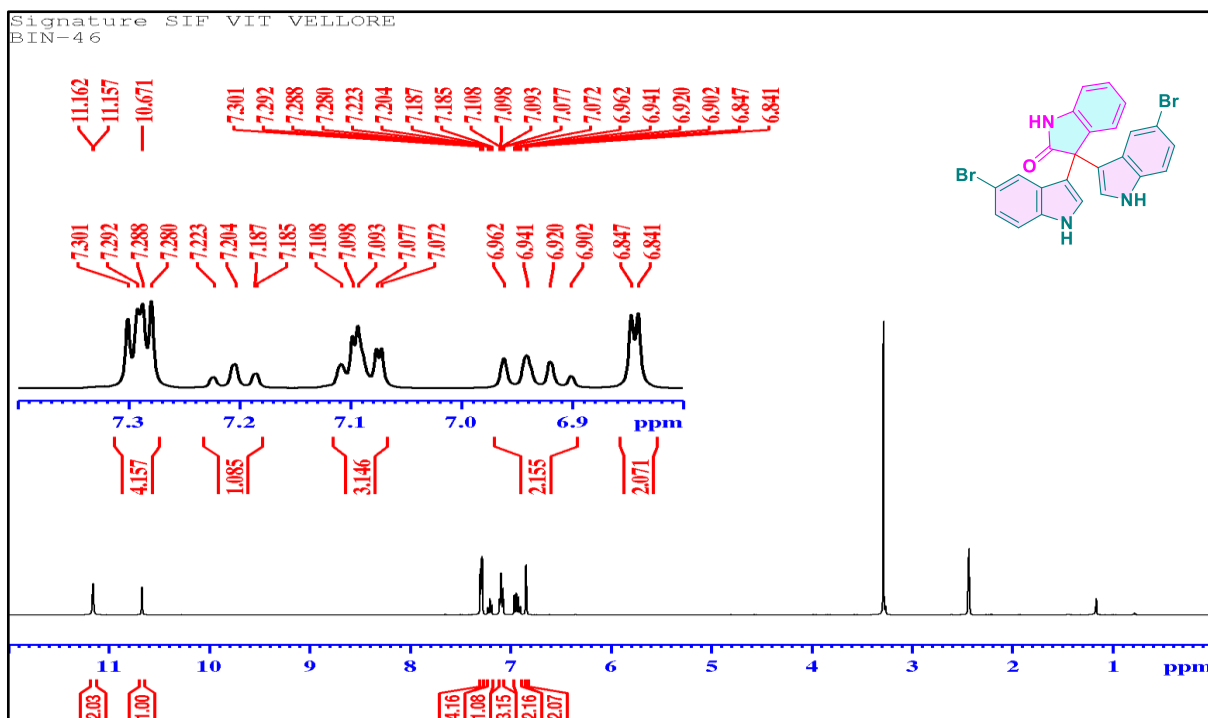

Fig. S38 <sup>1</sup>H NMR spectrum (400 MHz) of 7ea in DMSO-d<sub>6</sub>.

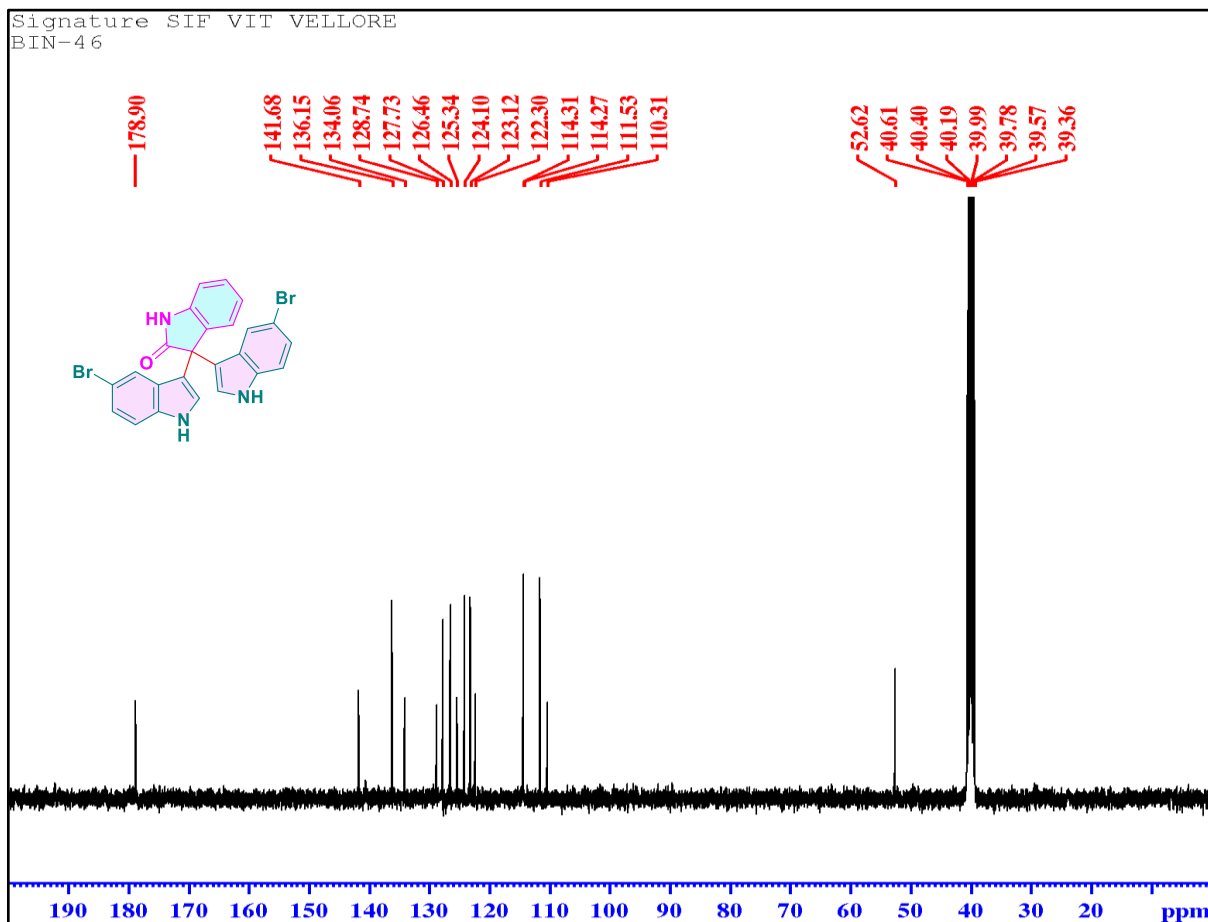

Fig. S39 <sup>13</sup>C NMR spectrum (100 MHz) of 7ea in DMSO-d<sub>6</sub>.

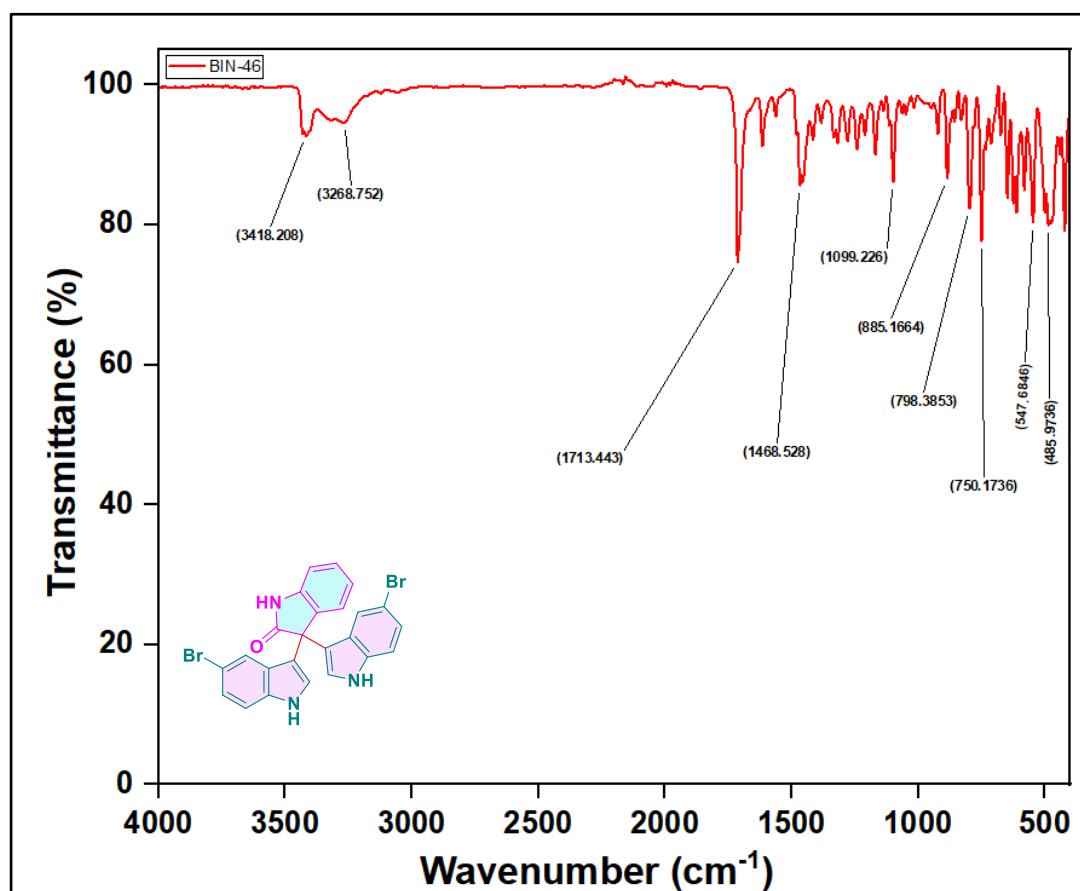

Fig. S40 FT-IR spectrum of 7ea.

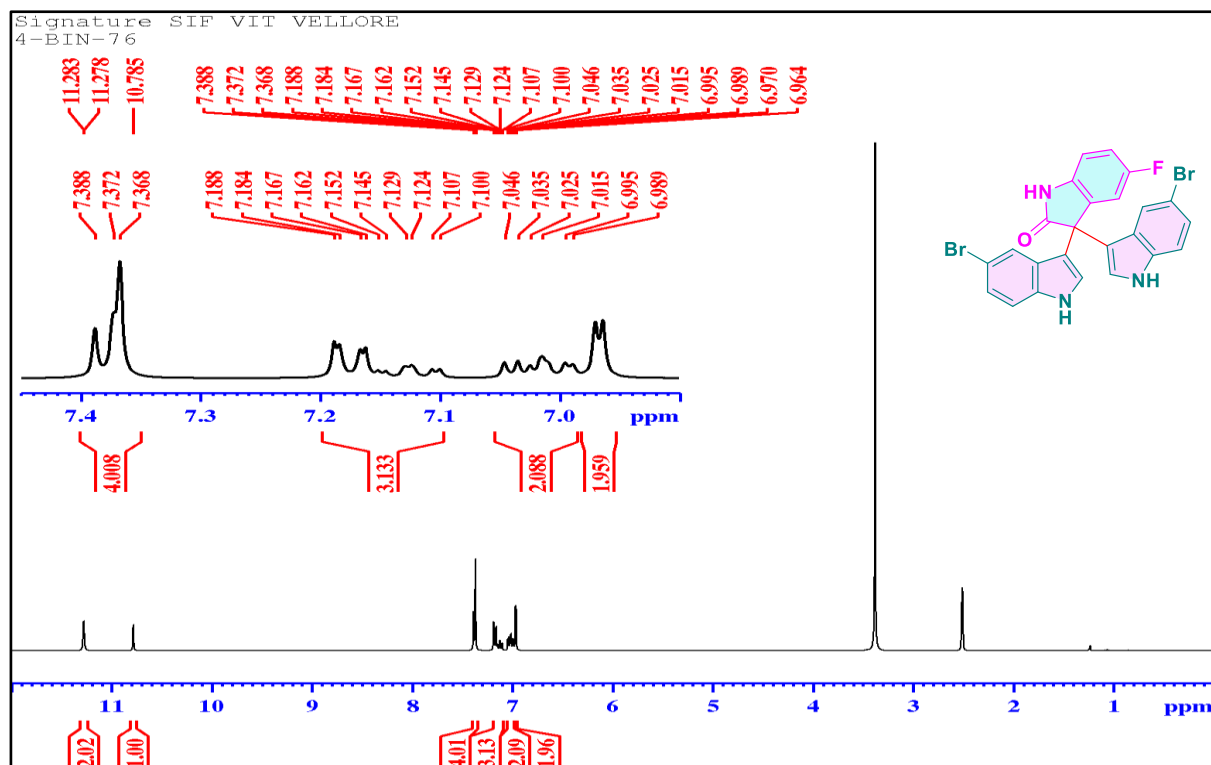

Fig. S41 <sup>1</sup>H NMR spectrum (400 MHz) of **7ec** in DMSO-d<sub>6</sub>.

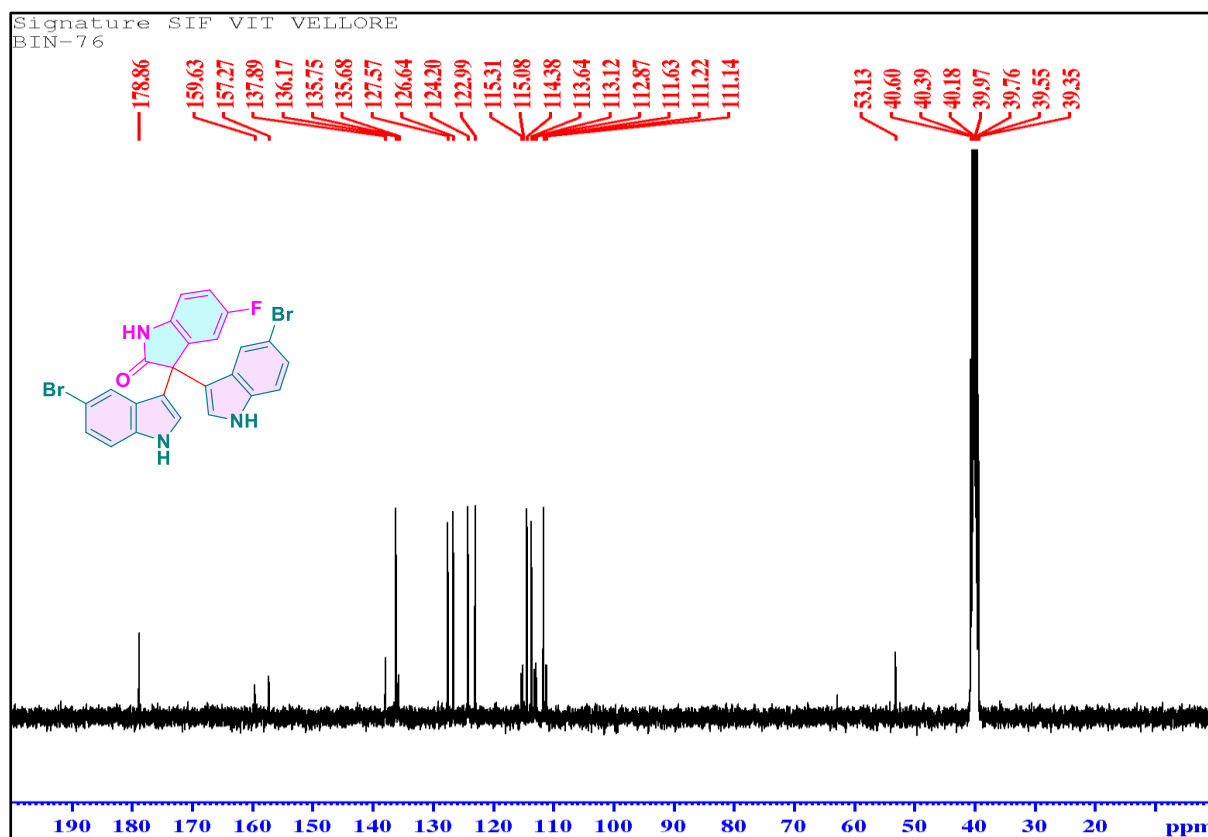

Fig. S42 <sup>13</sup>C NMR spectrum (100 MHz) of **7ec** in DMSO-d<sub>6</sub>.

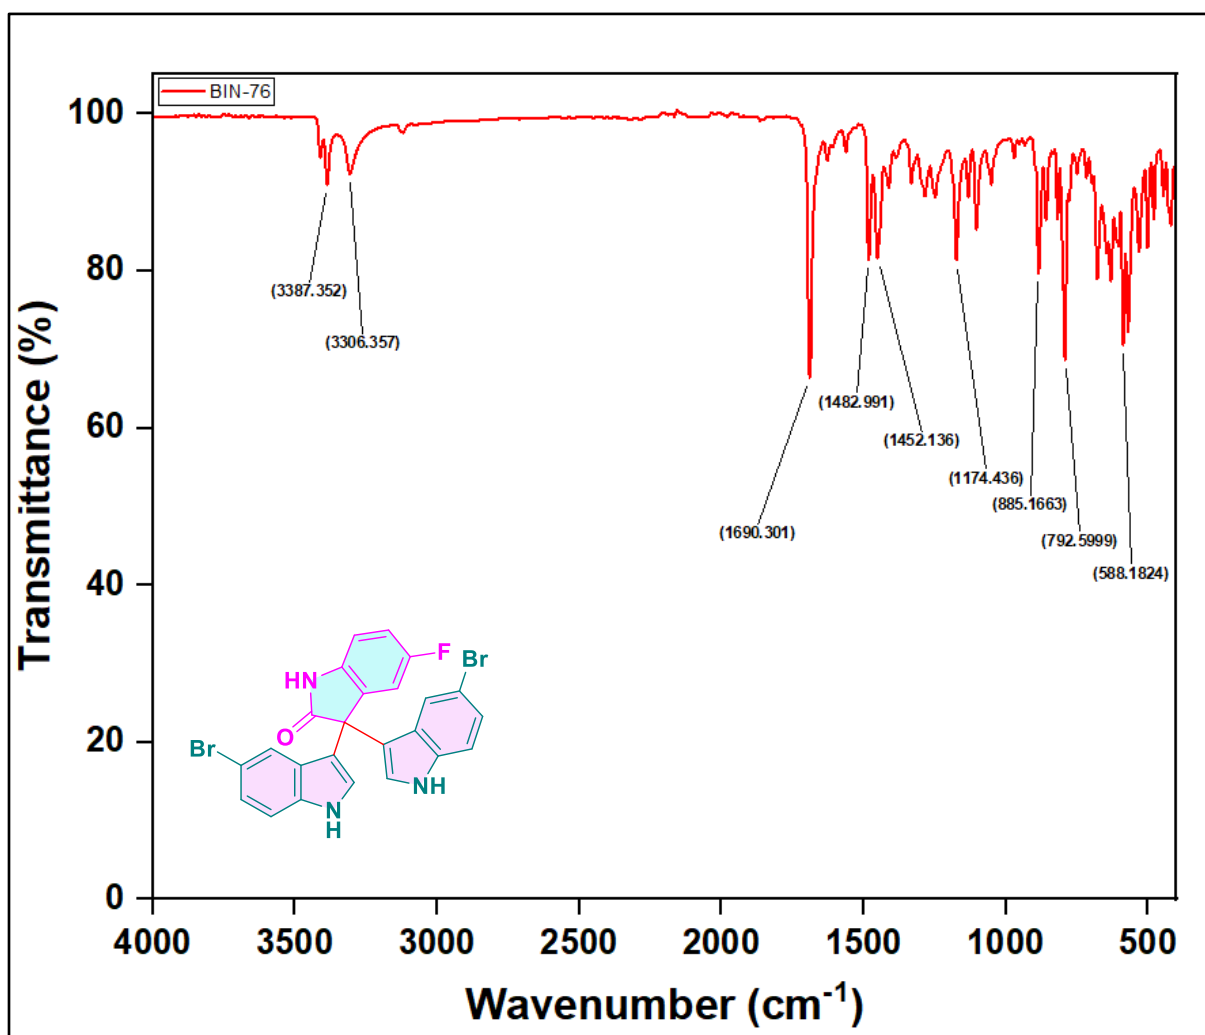

Fig. S43 FT-IR spectrum of 7ec.

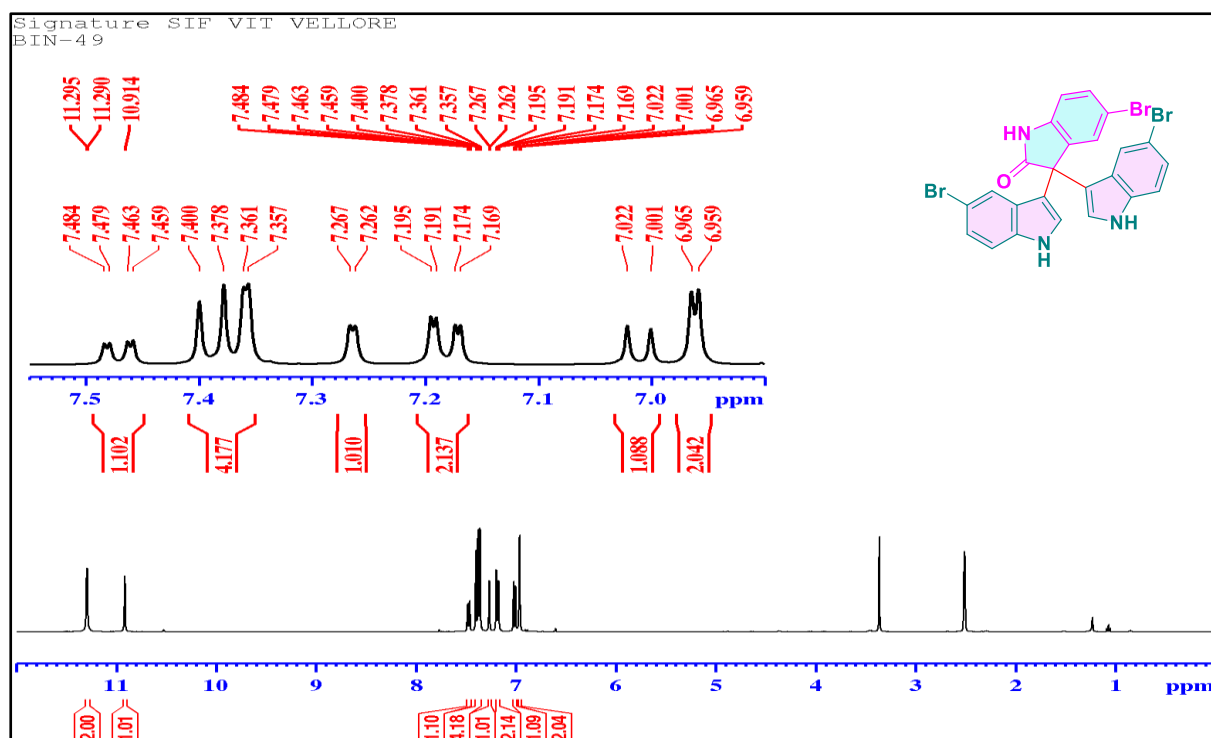

**Fig. S44** <sup>1</sup>H NMR spectrum (400 MHz) of **7ed** in DMSO-d<sub>6</sub>.

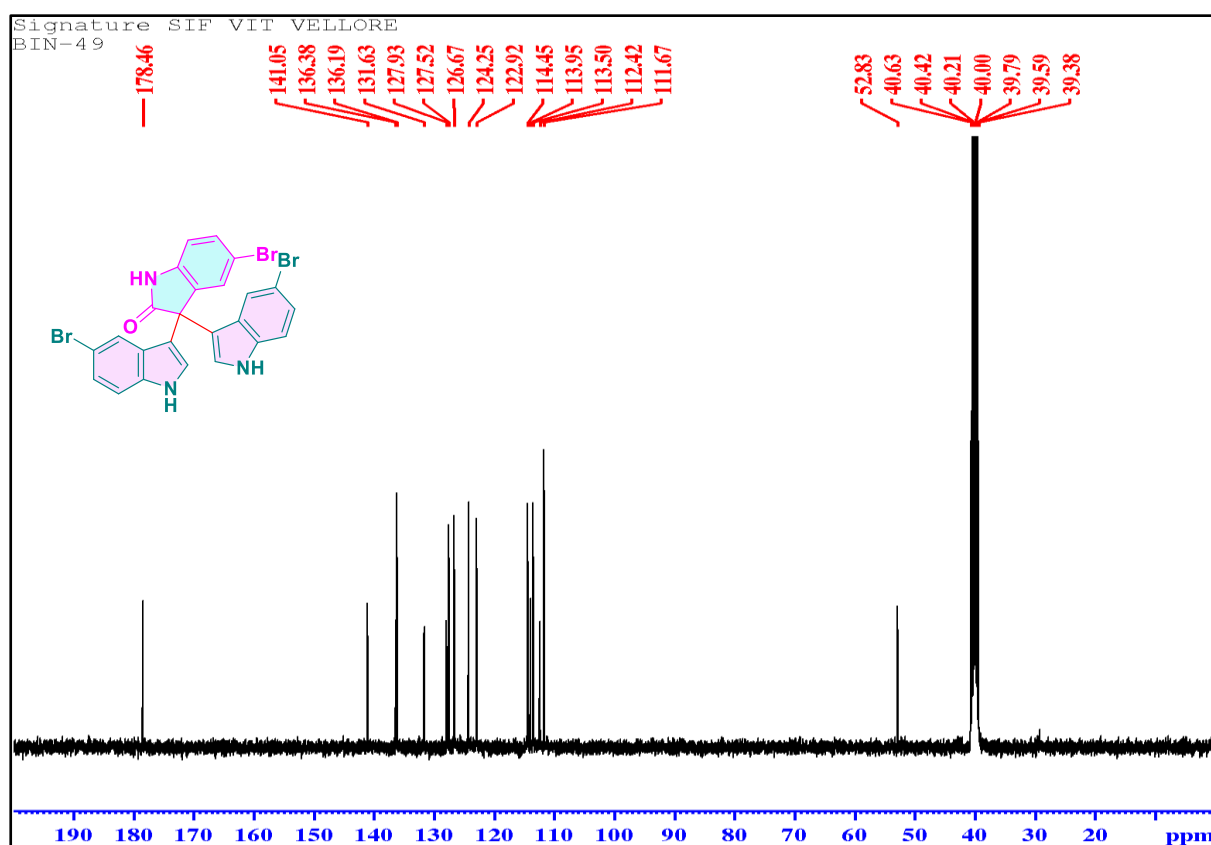

**Fig. S45** <sup>13</sup>C NMR spectrum (100 MHz) of **7ed** in DMSO-d<sub>6</sub>.

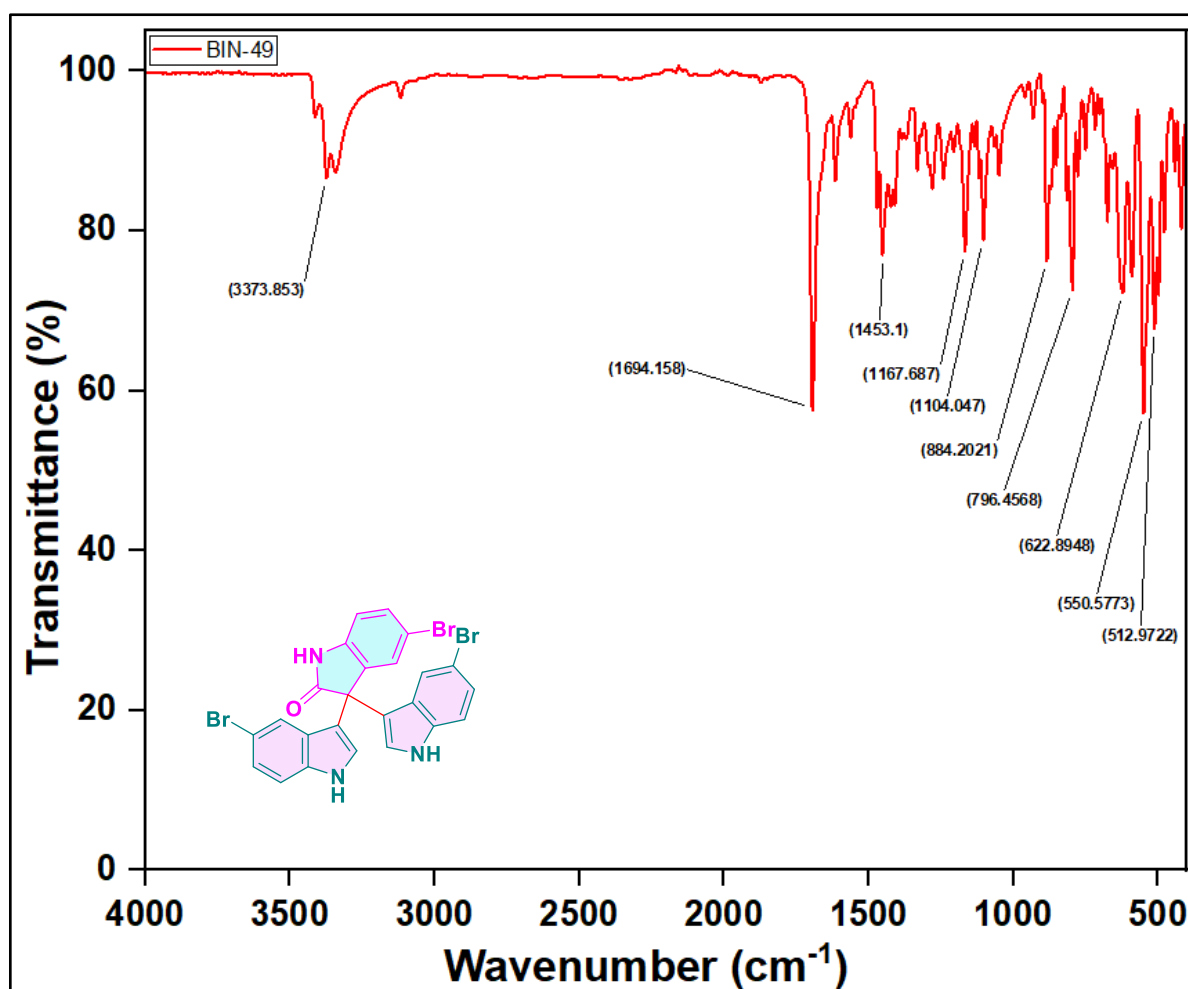

Fig. S46 FT-IR spectrum of 7ed.

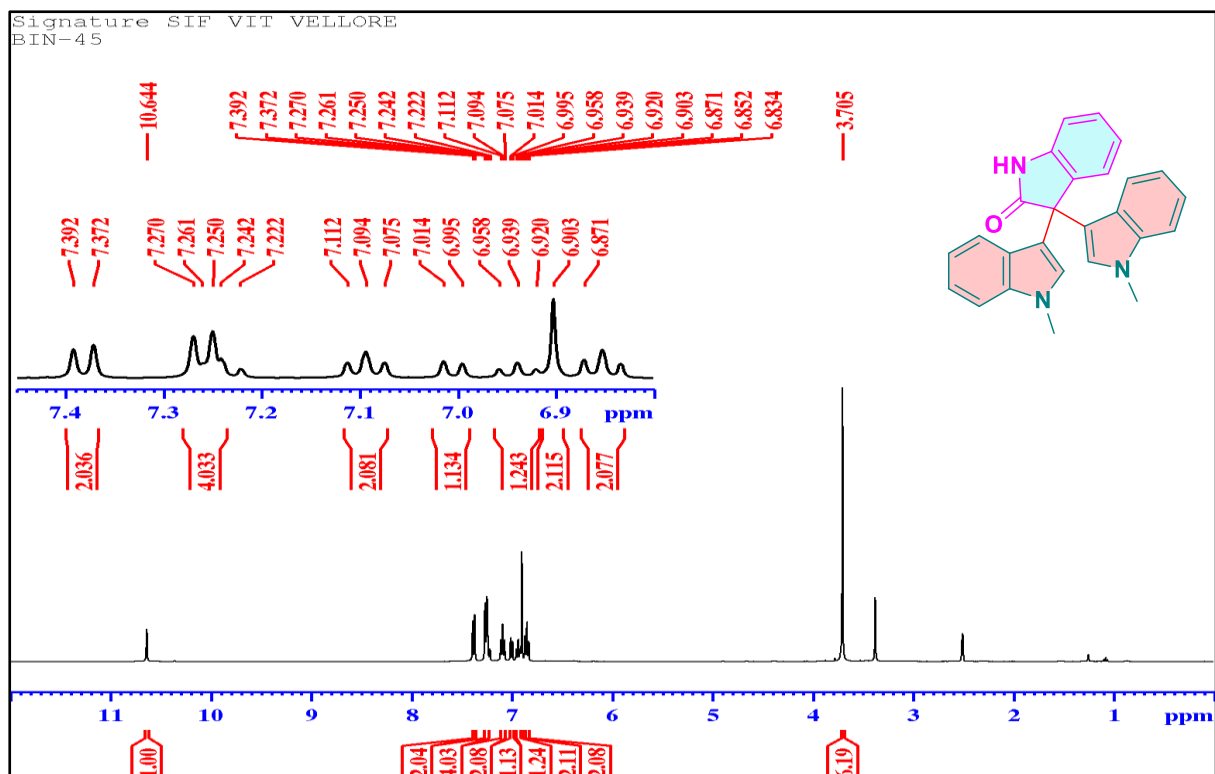

Fig. S47 <sup>1</sup>H NMR spectrum (400 MHz) of **7fa** in DMSO-d<sub>6</sub>.

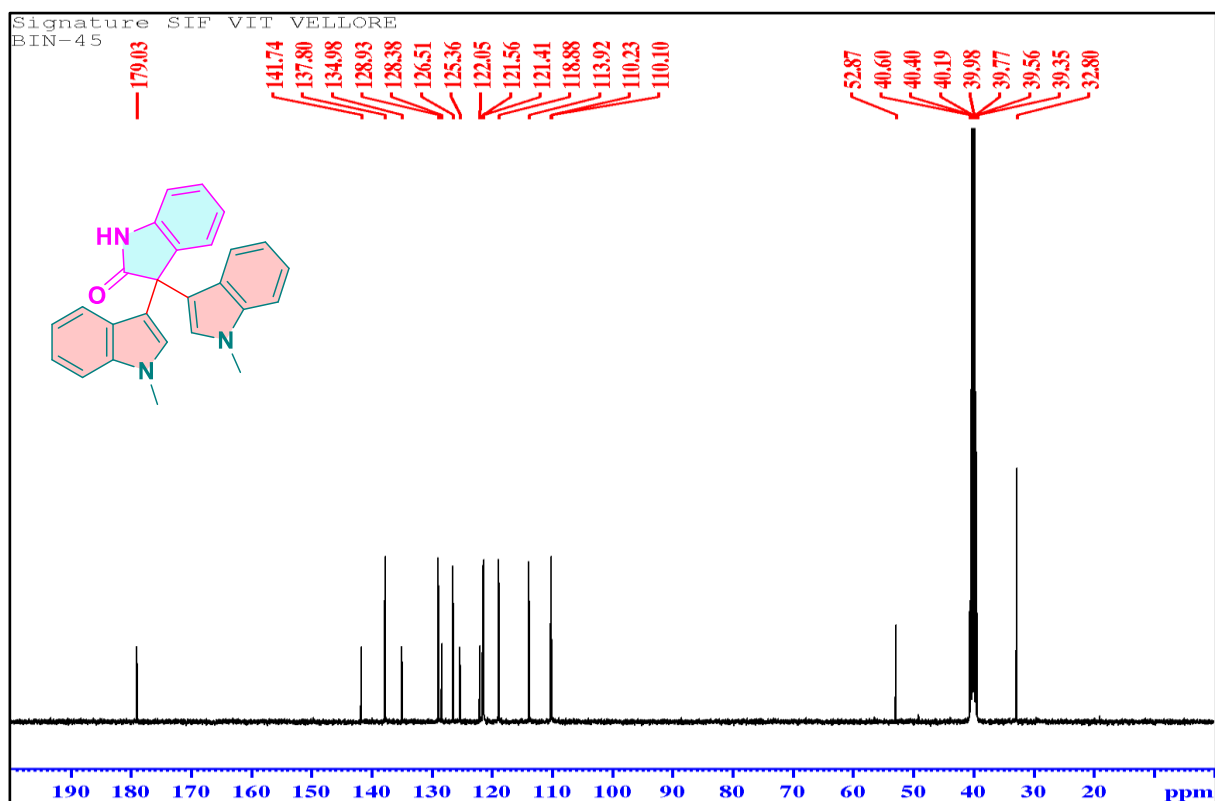

Fig. S48 <sup>13</sup>C NMR spectrum (100 MHz) of **7fa** in DMSO-d<sub>6</sub>.

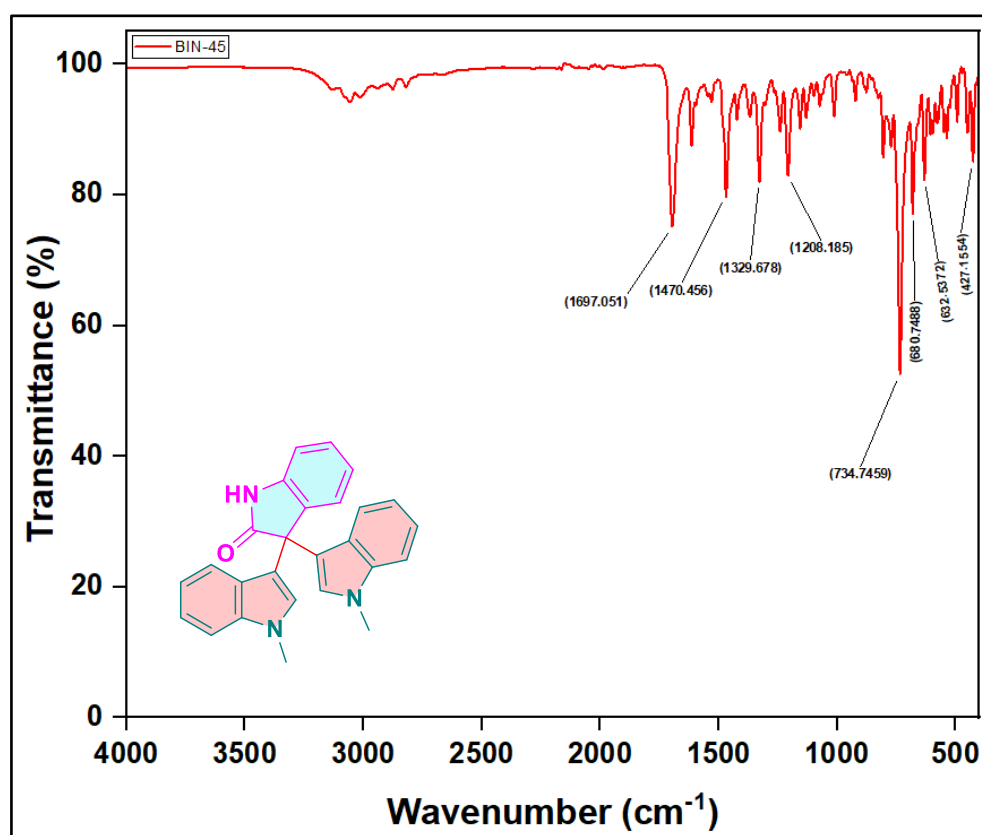

Fig. S49 FT-IR spectrum of 7fa.

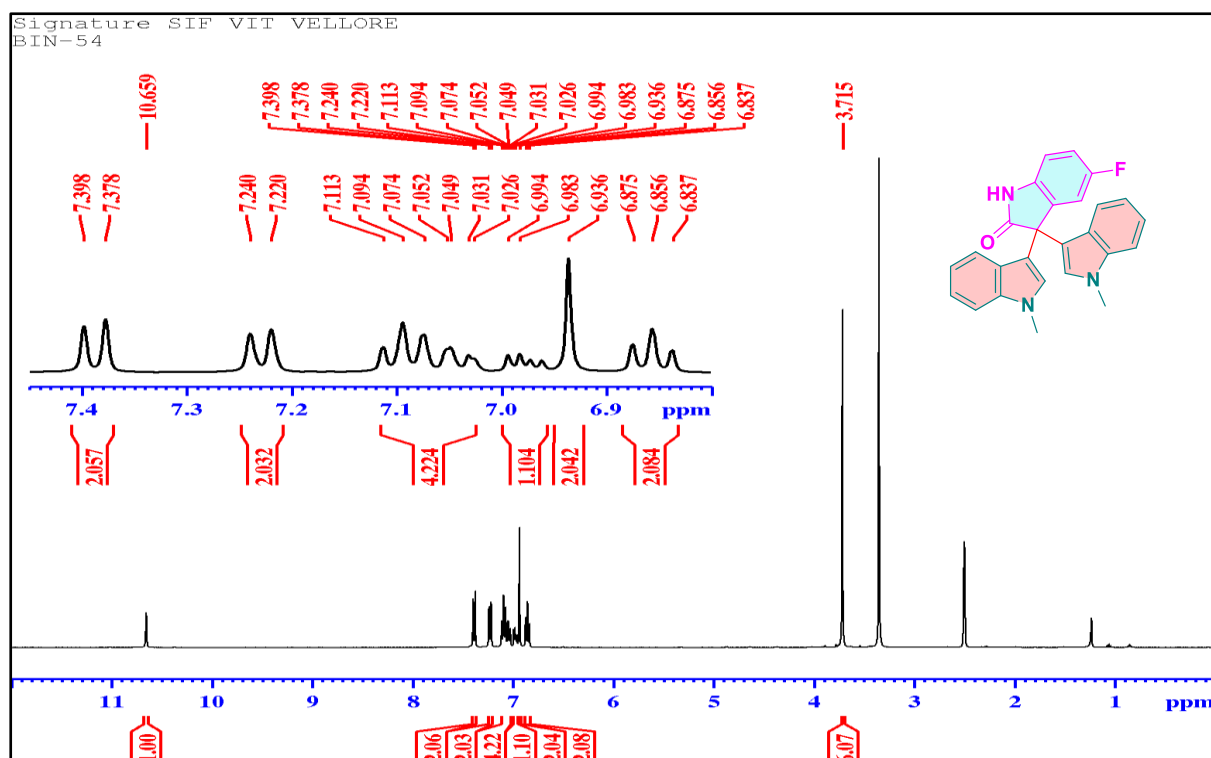

Fig. S50  $^1\text{H}$  NMR spectrum (400 MHz) of **7fb** in  $\text{DMSO-d}_6$ .

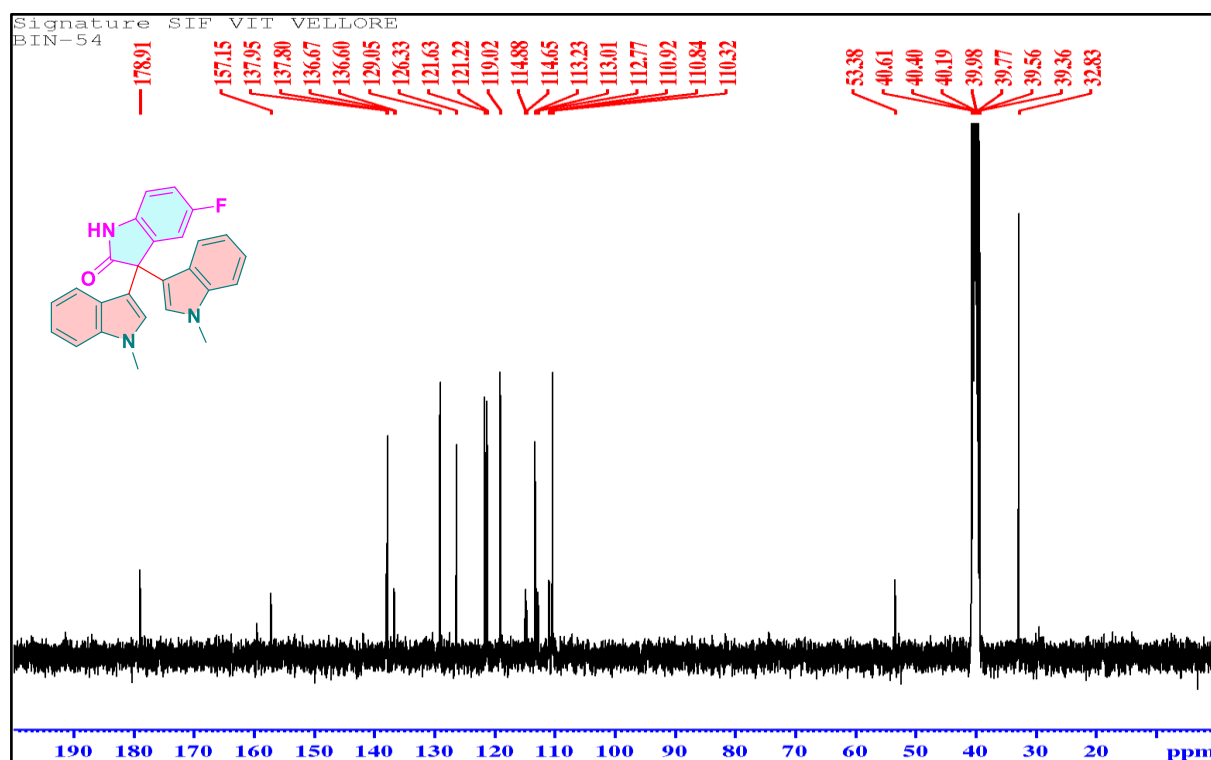

Fig. S51  $^{13}\text{C}$  NMR spectrum (100 MHz) of **7fb** in  $\text{DMSO-d}_6$ .

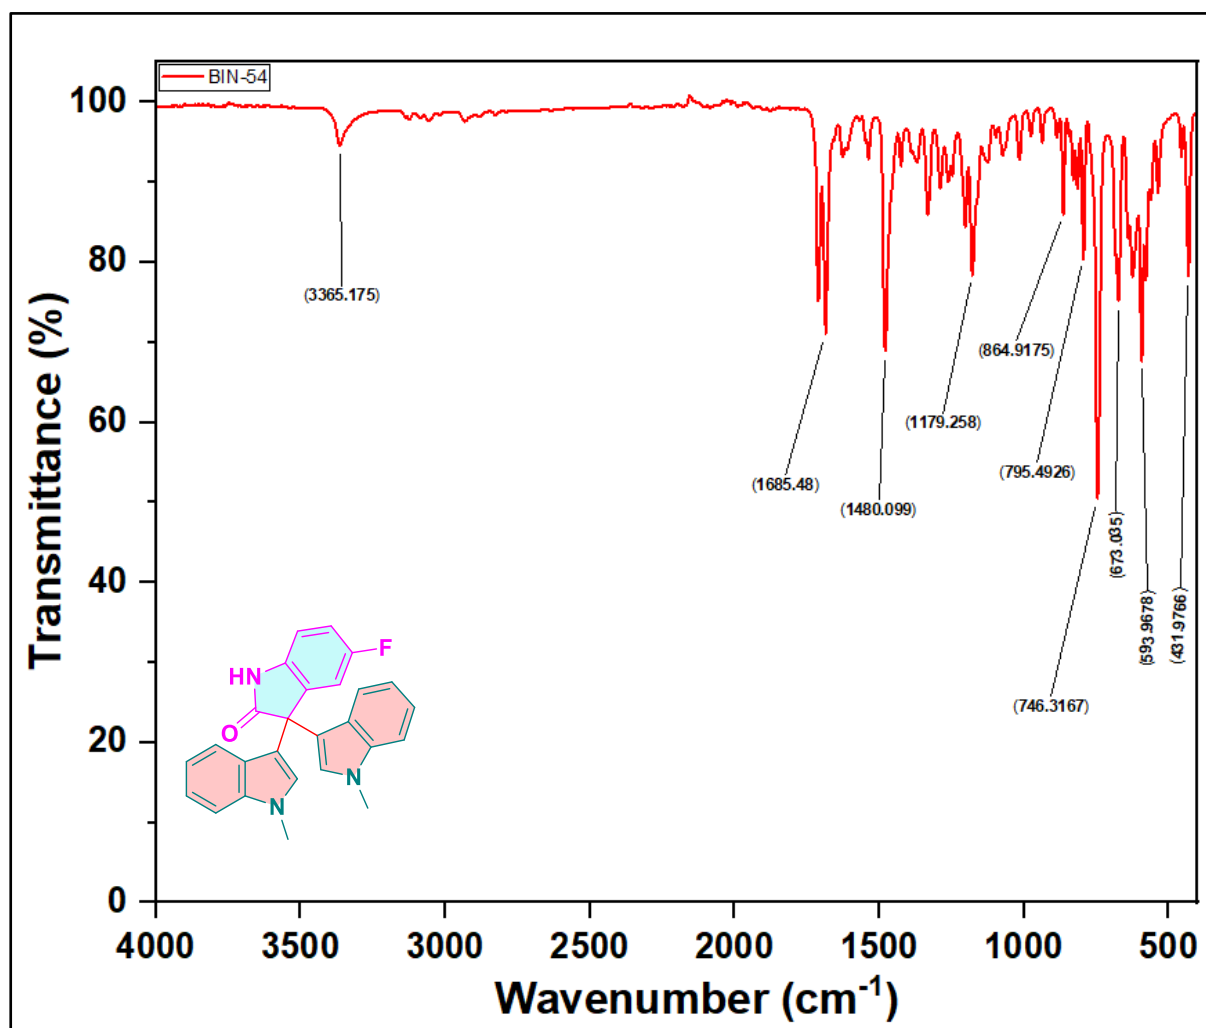

Fig. S52 FT-IR spectrum of 7fb.

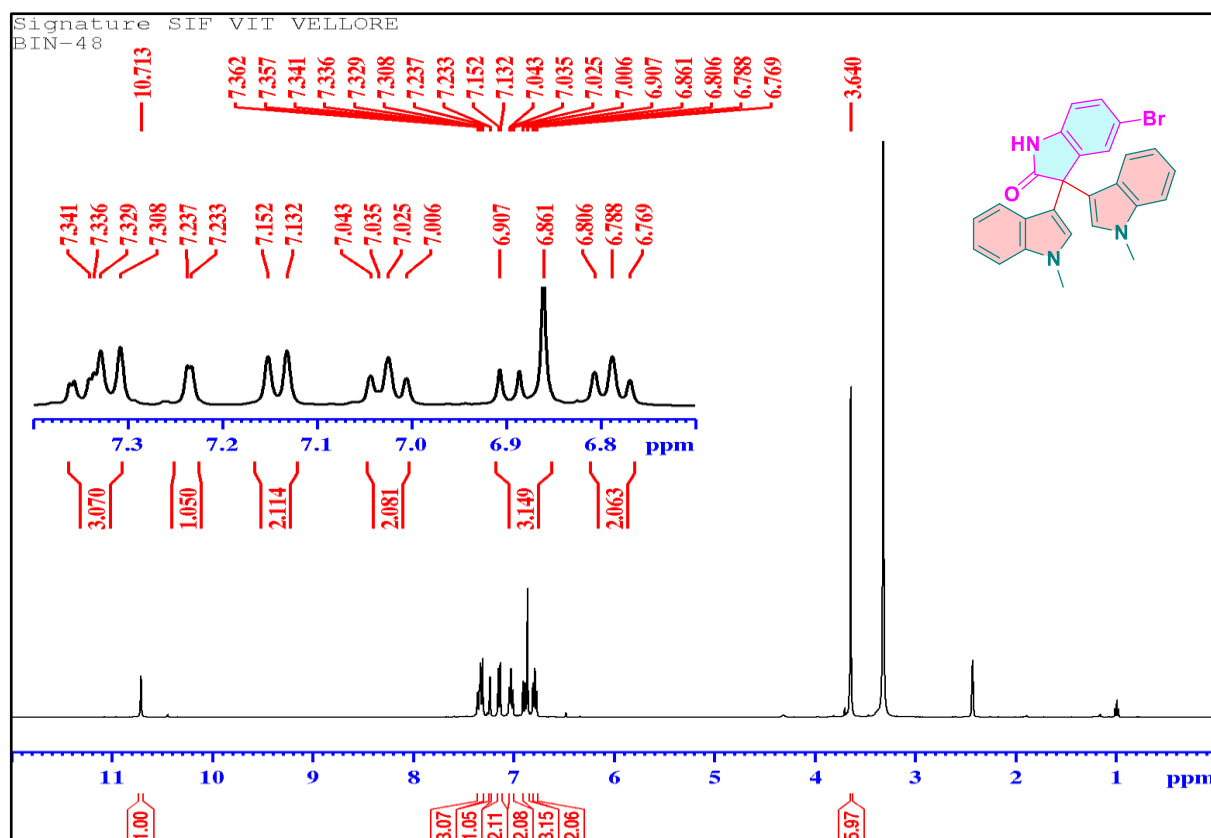

**Fig. S53** <sup>1</sup>H NMR spectrum (400 MHz) of **7fd** in DMSO-d<sub>6</sub>.

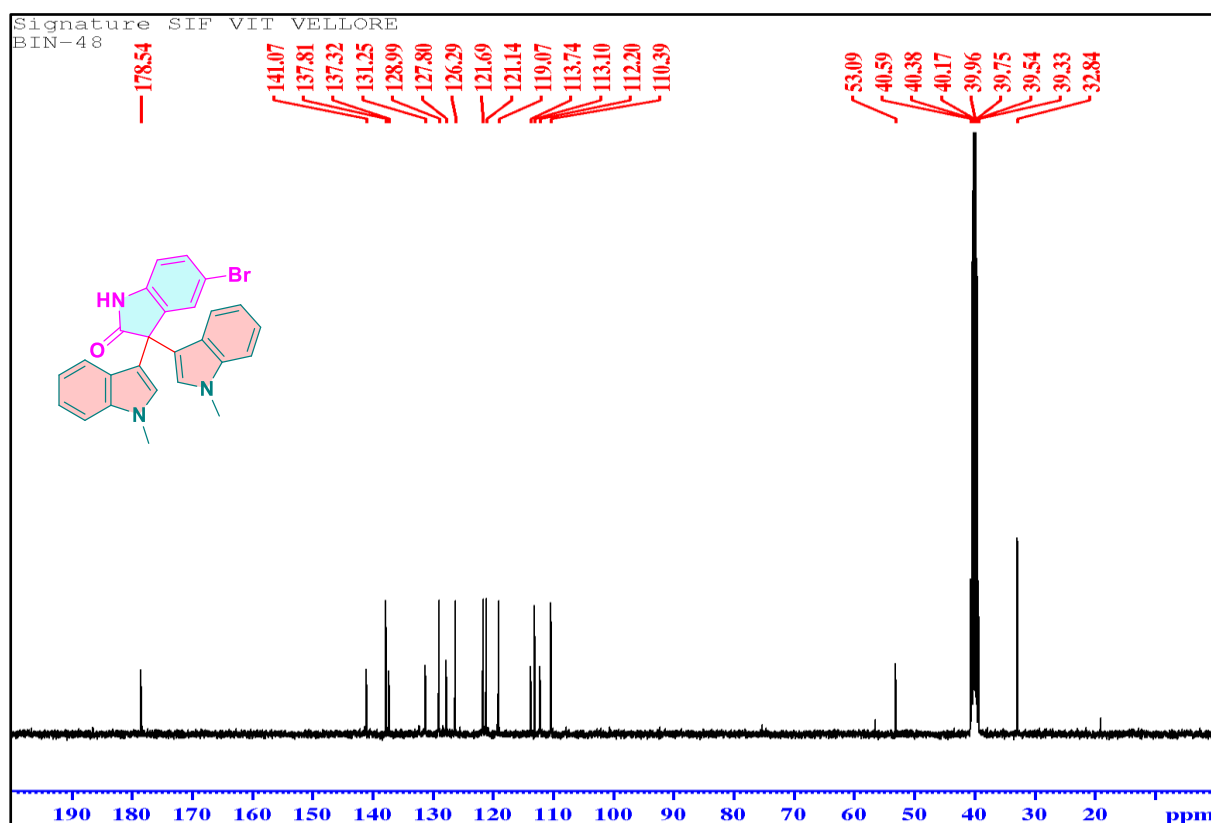

**Fig. S54** <sup>13</sup>C NMR spectrum (100 MHz) of **7fd** in DMSO-d<sub>6</sub>.

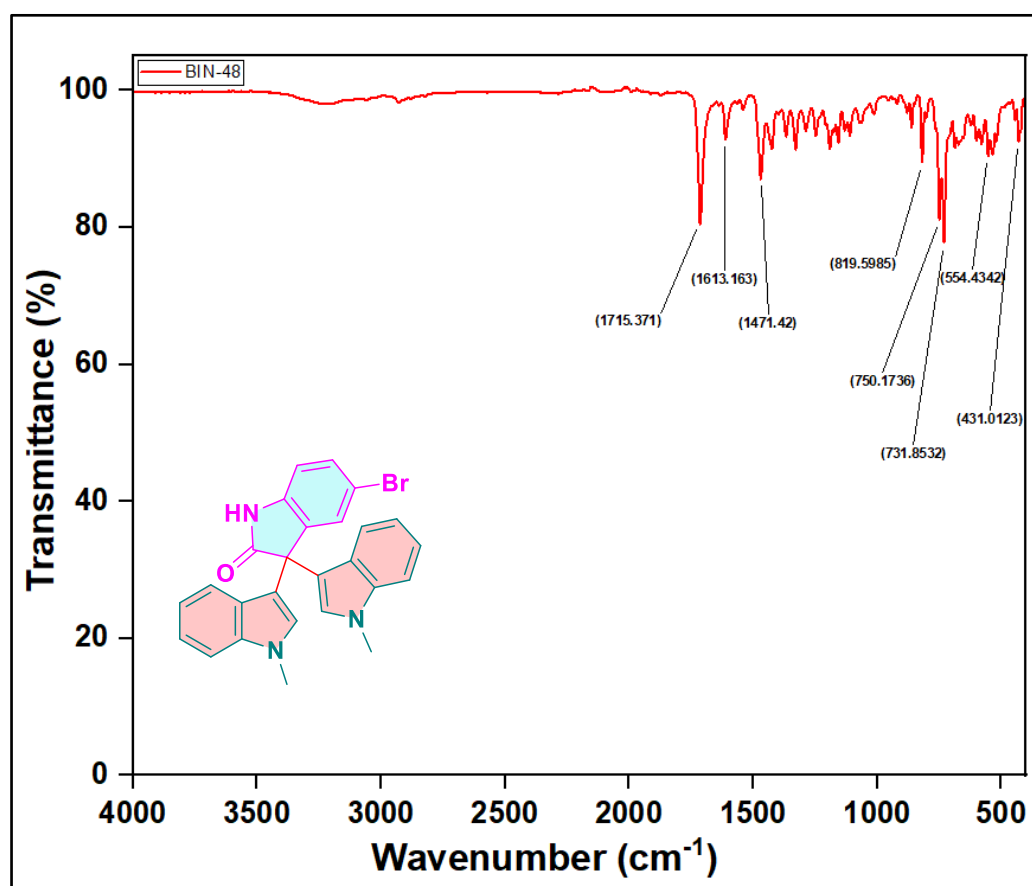

Fig. S55 FT-IR spectrum of 7fd.

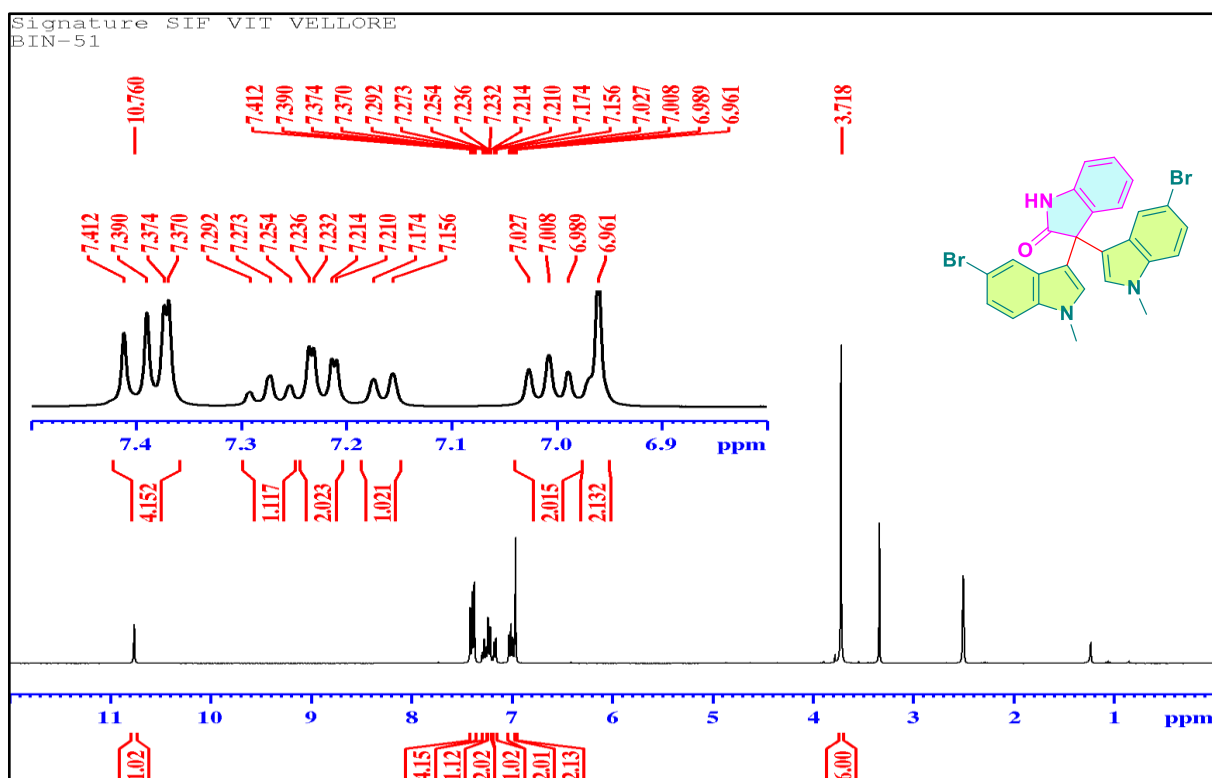

Fig. S56 <sup>1</sup>H NMR spectrum (400 MHz) of 7ga in DMSO-d<sub>6</sub>.

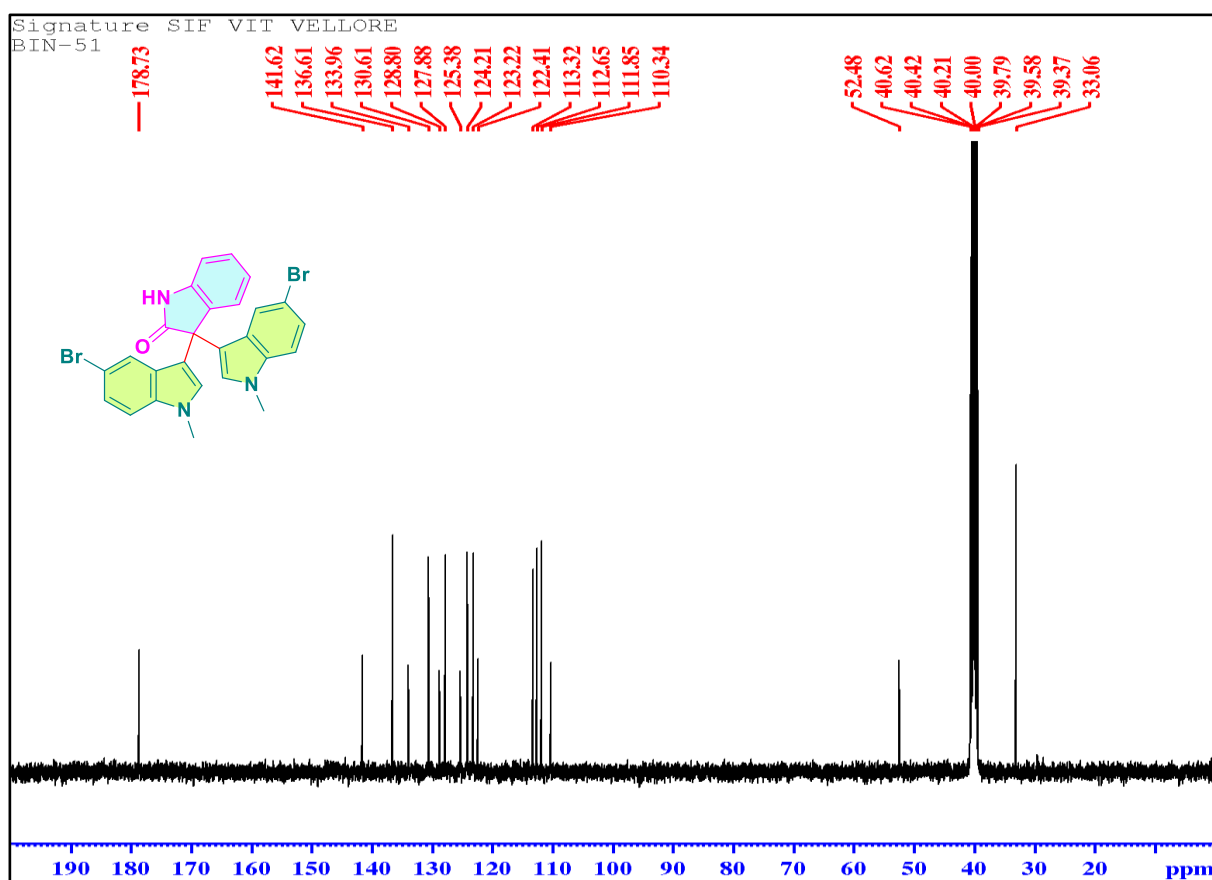

Fig. S57 <sup>13</sup>C NMR spectrum (100 MHz) of 7ga in DMSO-d<sub>6</sub>.

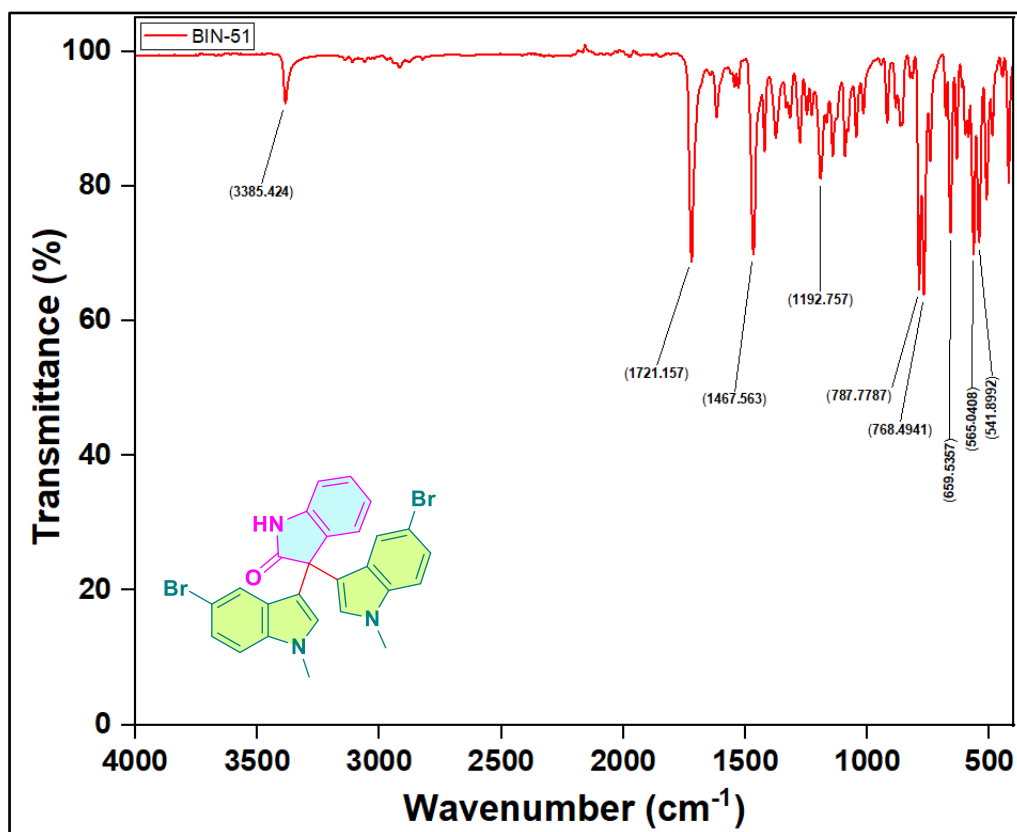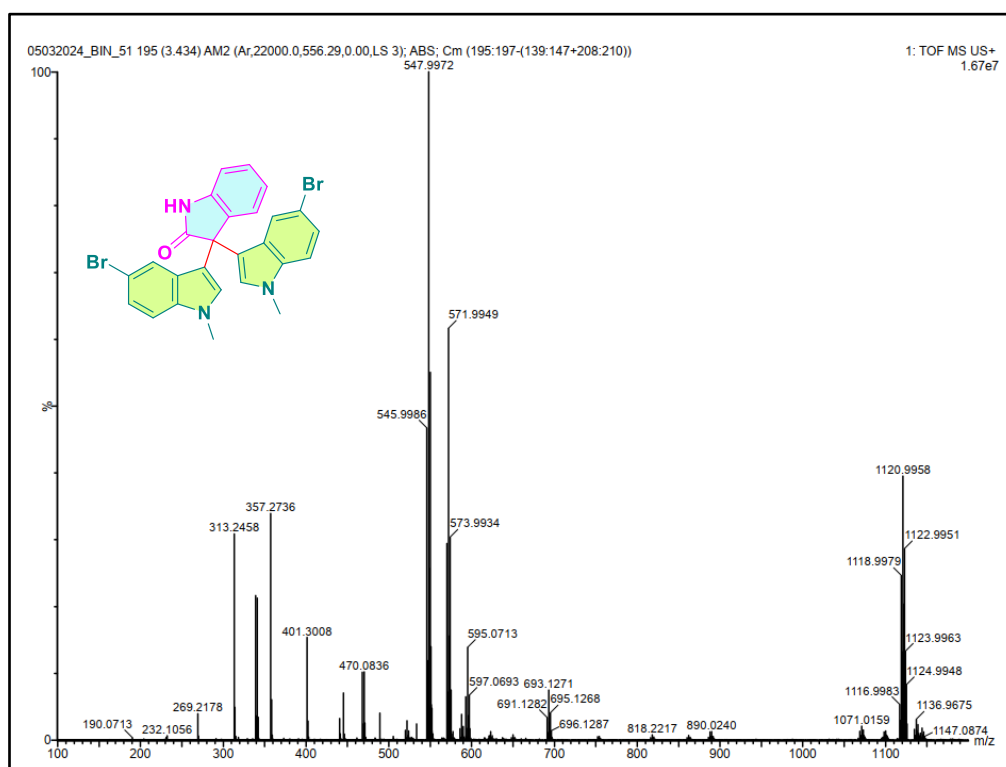

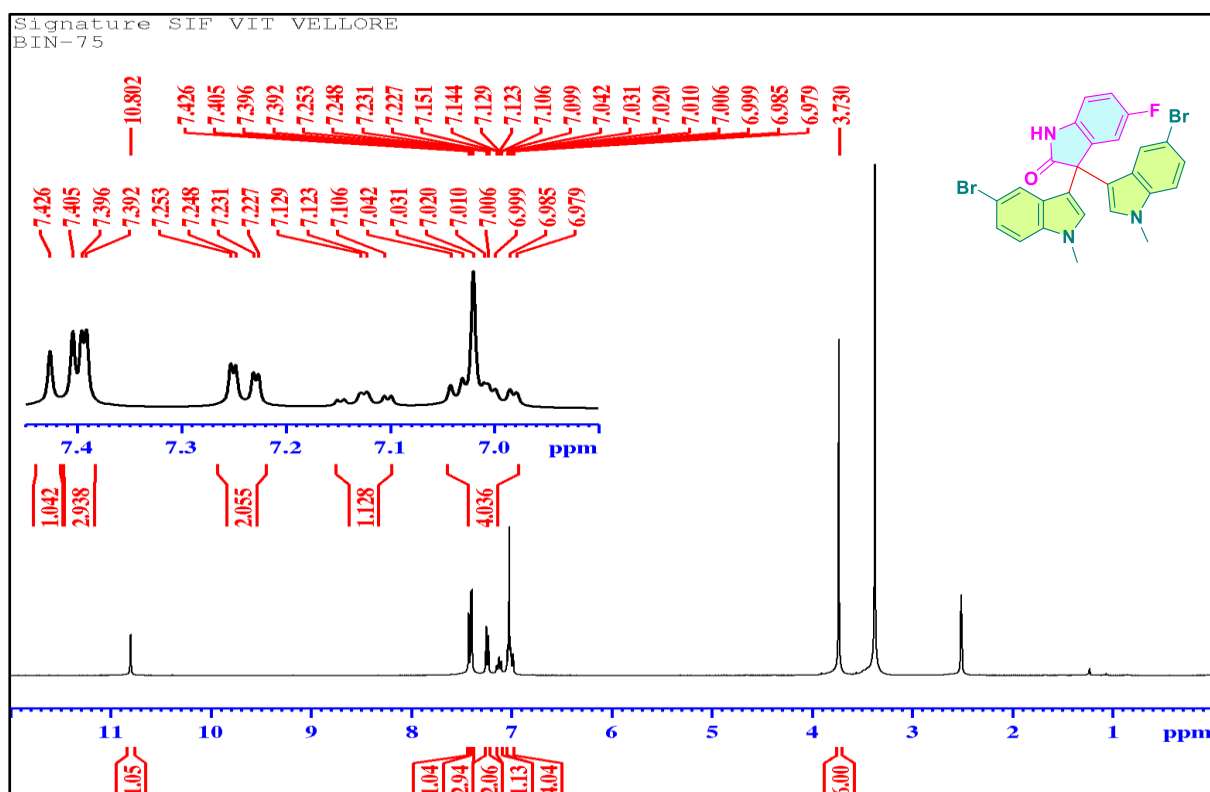

Fig. S60 <sup>1</sup>H NMR spectrum (400 MHz) of **7gc** in DMSO-d<sub>6</sub>.

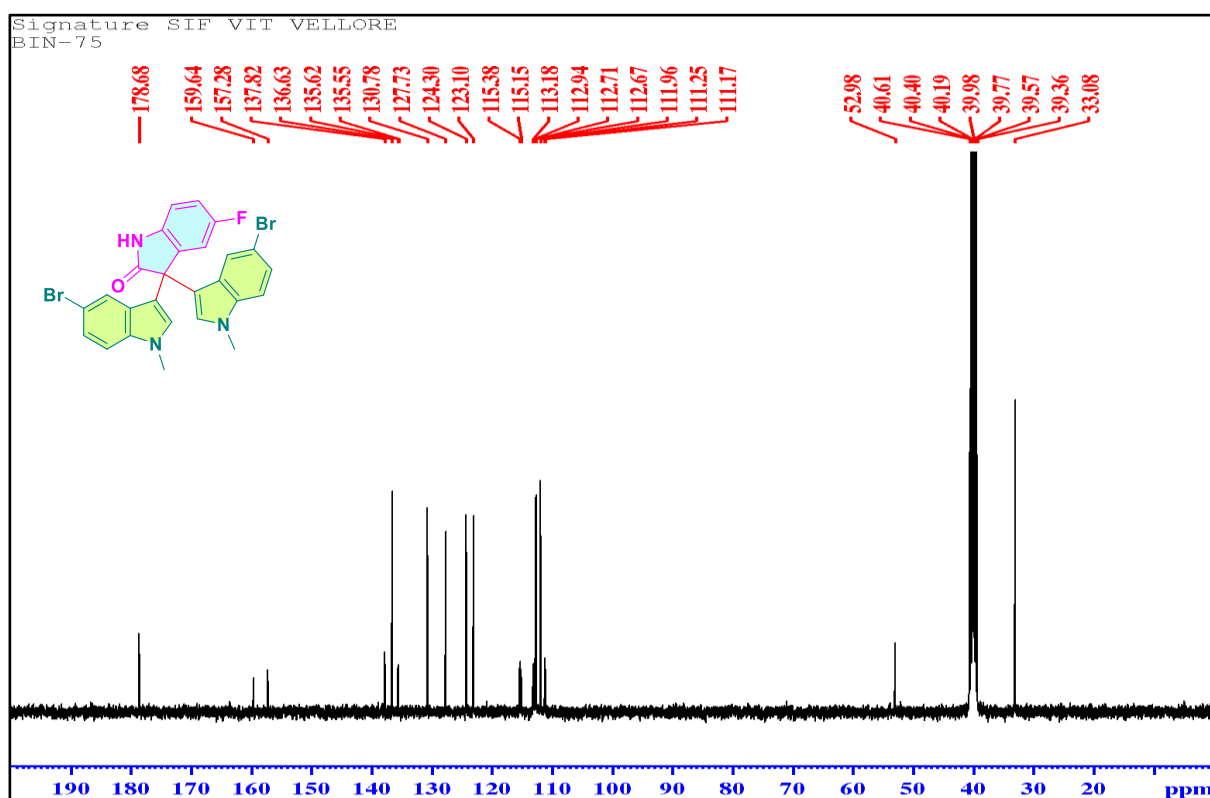

Fig. S61 <sup>13</sup>C NMR spectrum (100 MHz) of **7gc** in DMSO-d<sub>6</sub>.

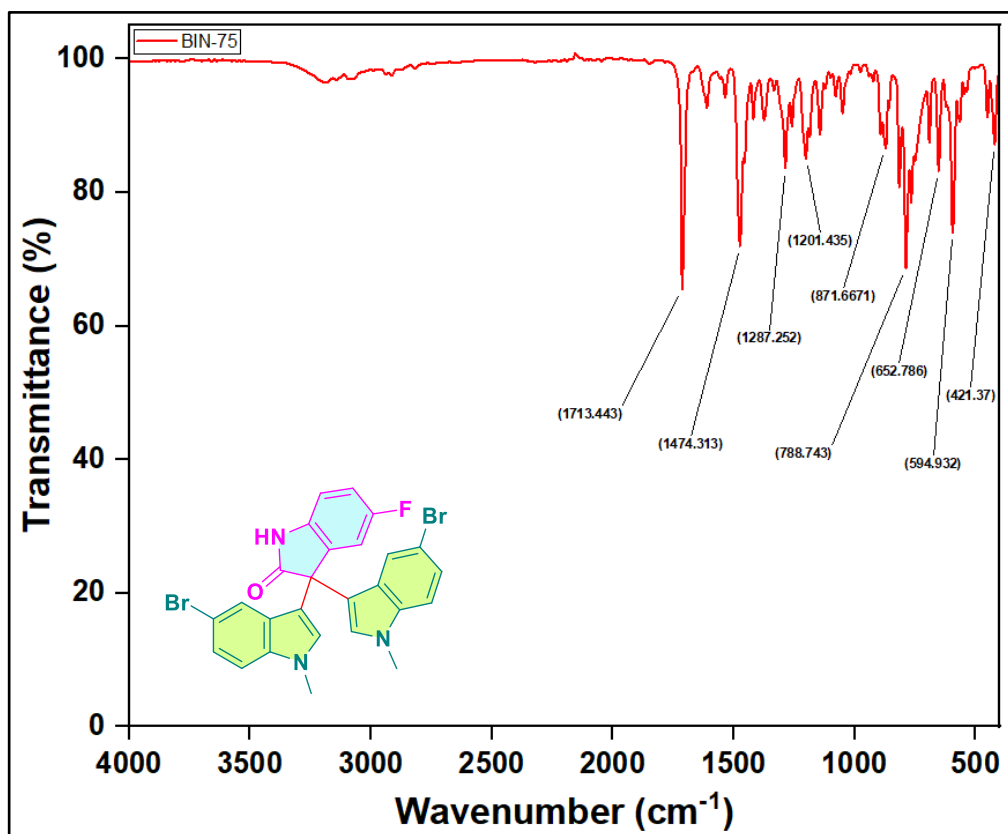

Fig. S62 FT-IR spectrum of 7gc.

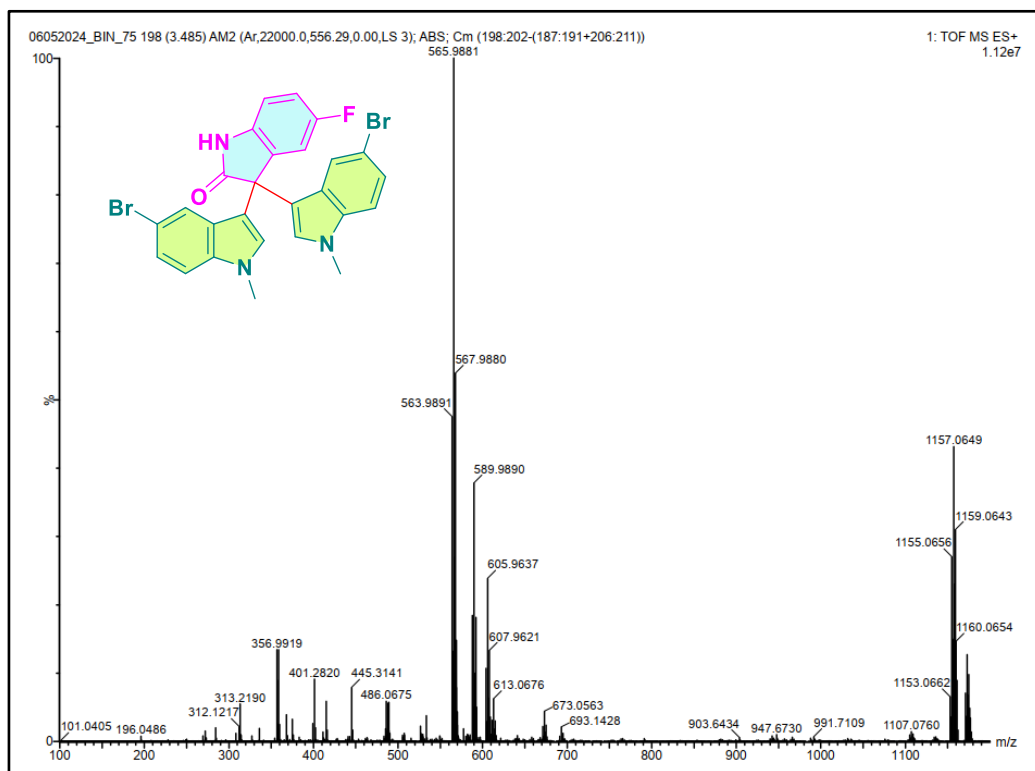

Fig. S63 HR-MS spectrum of 7gc.

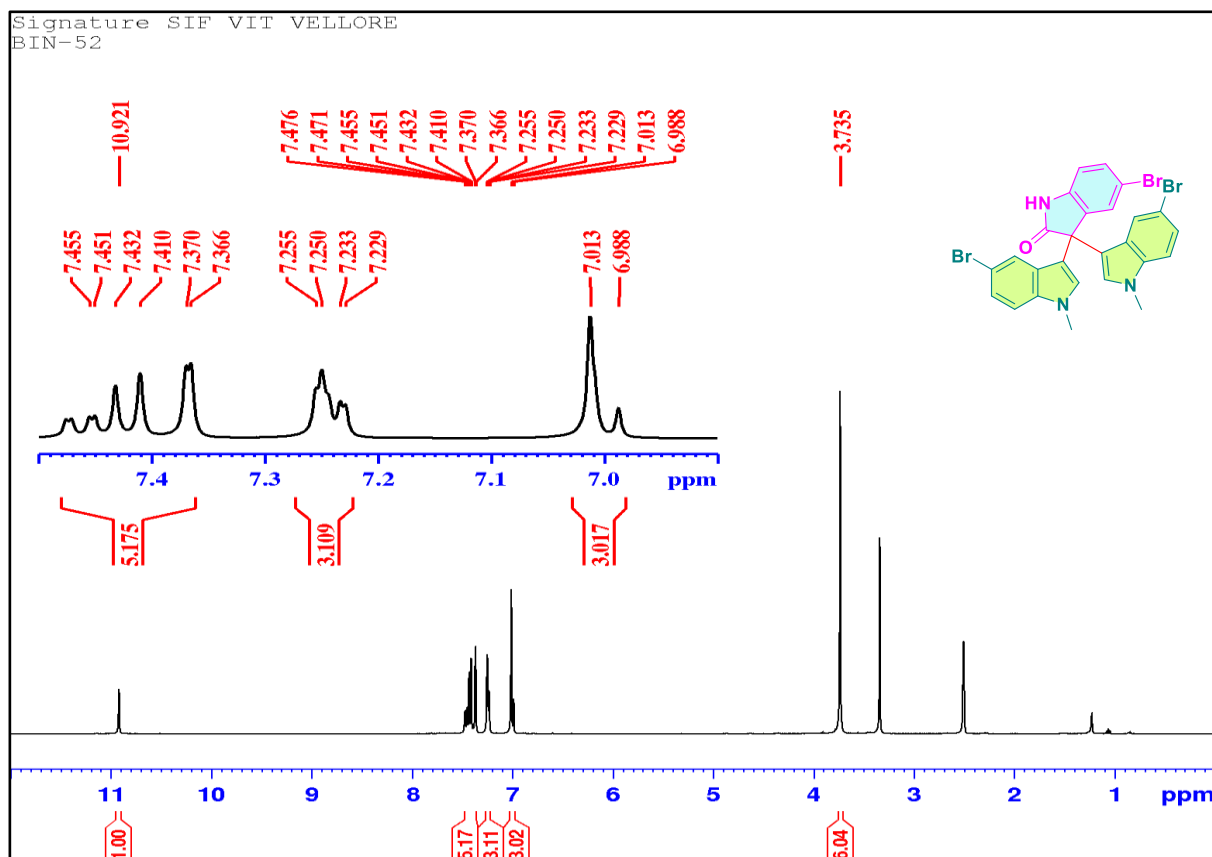

**Fig. S64** <sup>1</sup>H NMR spectrum (400 MHz) of **7gd** in DMSO-d<sub>6</sub>.

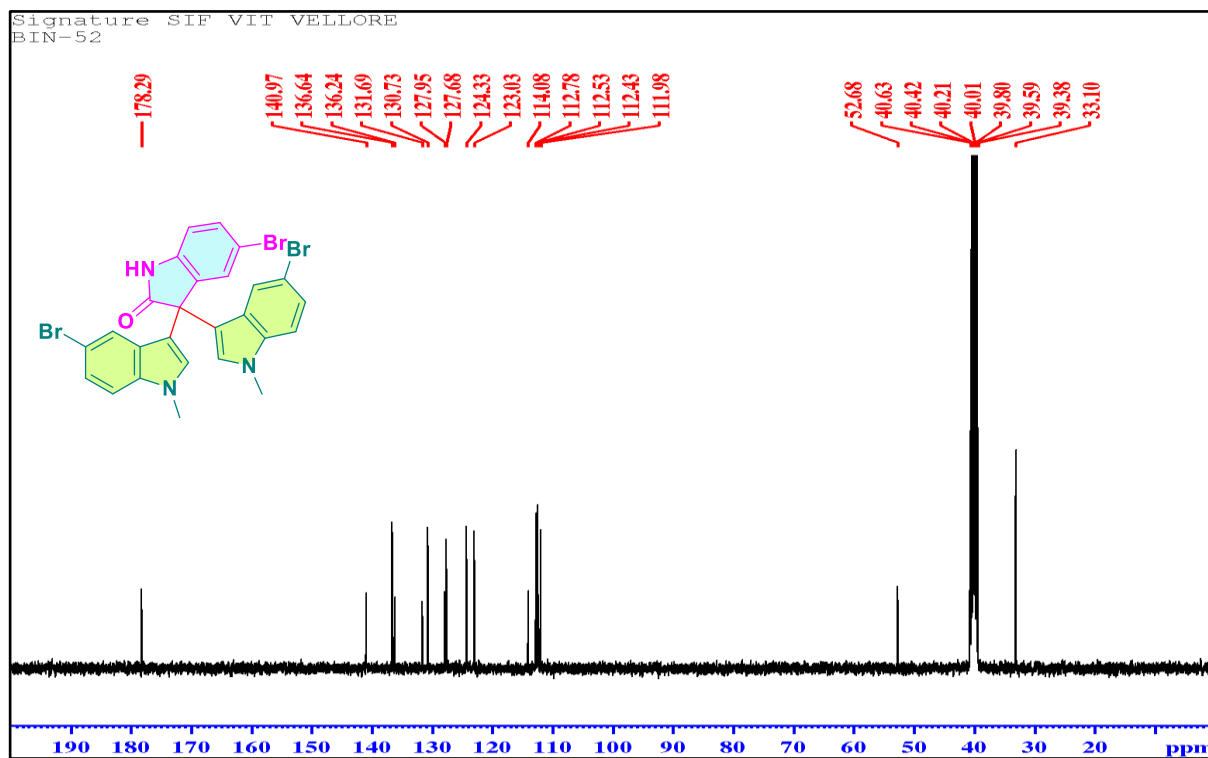

**Fig. S65** <sup>13</sup>C NMR spectrum (100 MHz) of **7gd** in DMSO-d<sub>6</sub>.

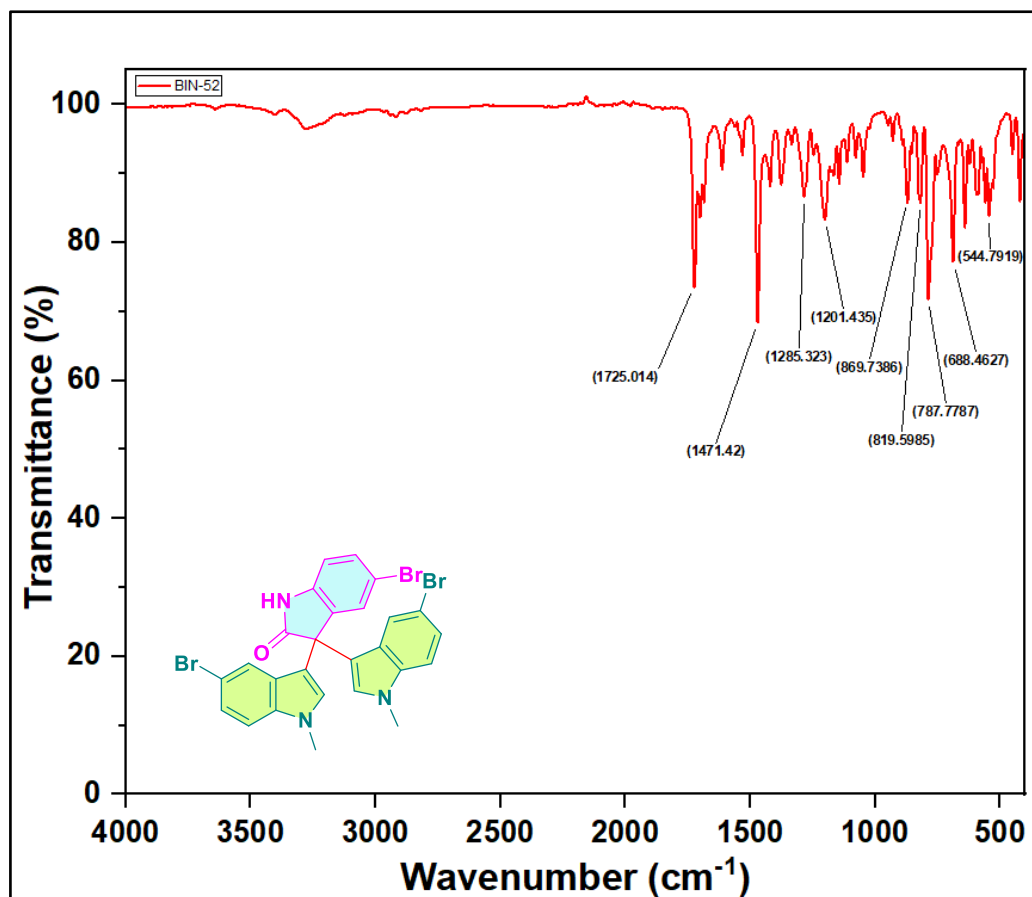

Fig. S66 FT-IR spectrum of 7gd.

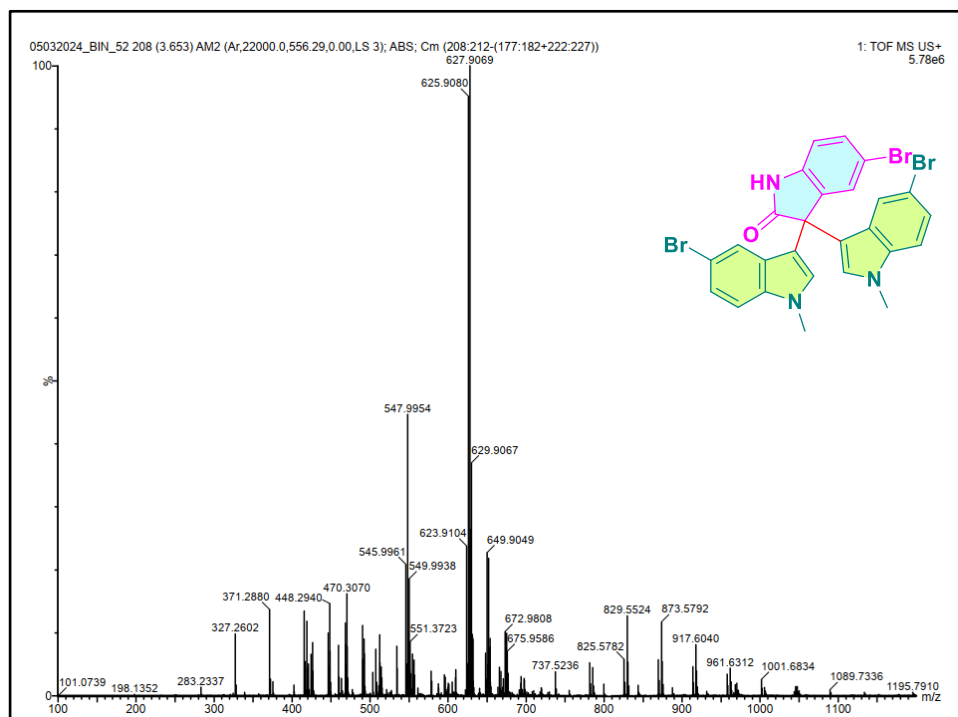

Fig. S67 HR-MS spectrum of 7gd.

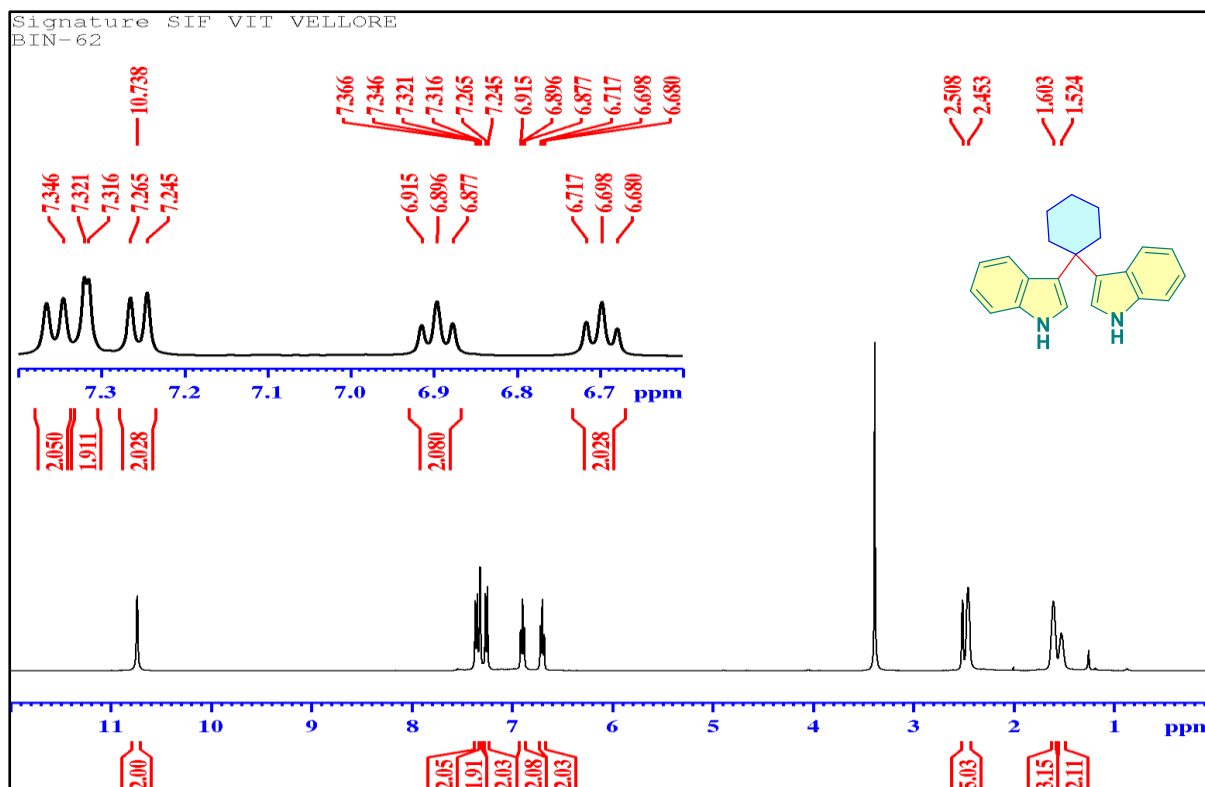

Fig. S68 <sup>1</sup>H NMR spectrum (400 MHz) of 7ai in DMSO-d<sub>6</sub>.

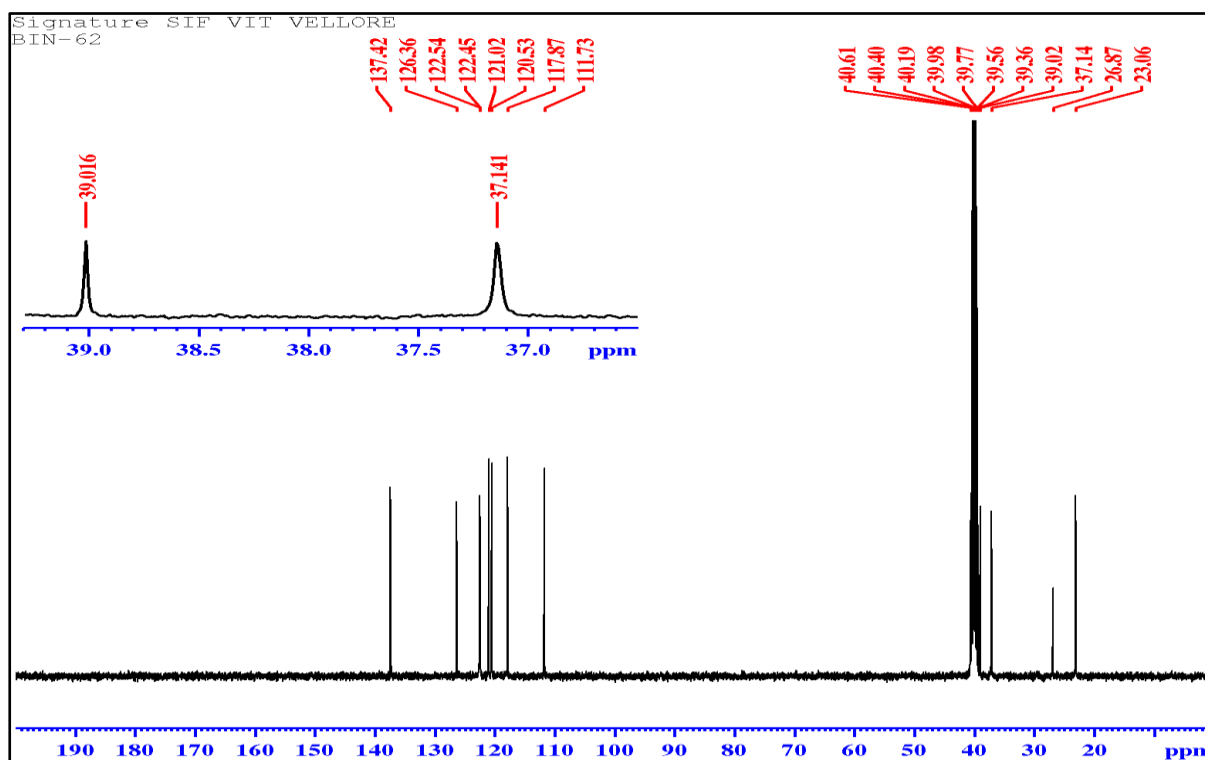

Fig. S69 <sup>13</sup>C NMR spectrum (100 MHz) of 7ai in DMSO-d<sub>6</sub>.

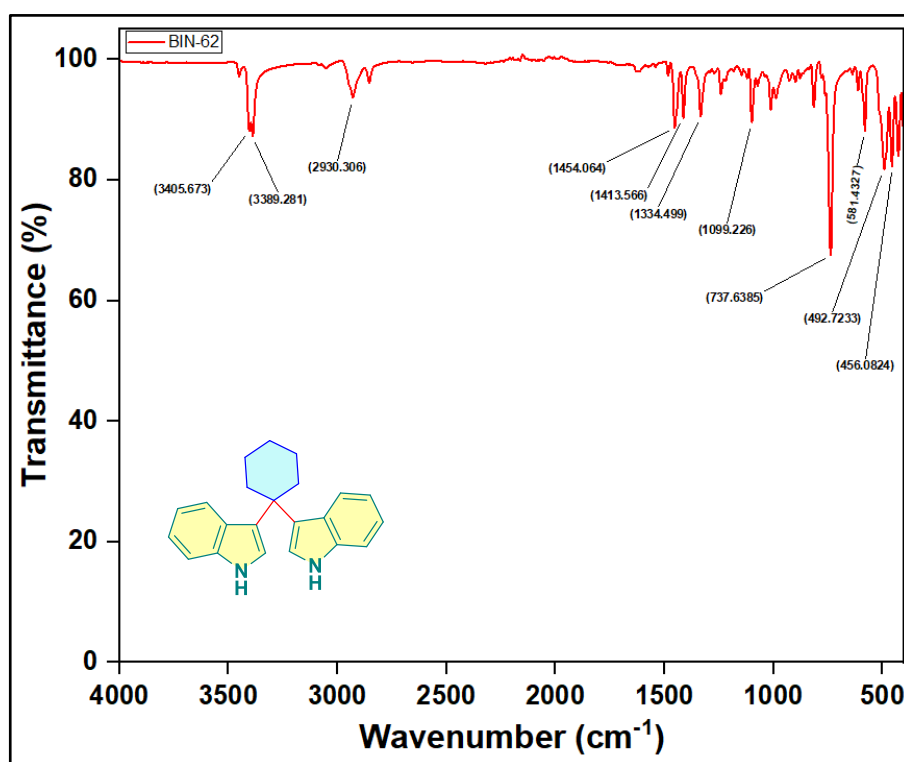

Fig. S70 FT-IR spectrum of 7ai.

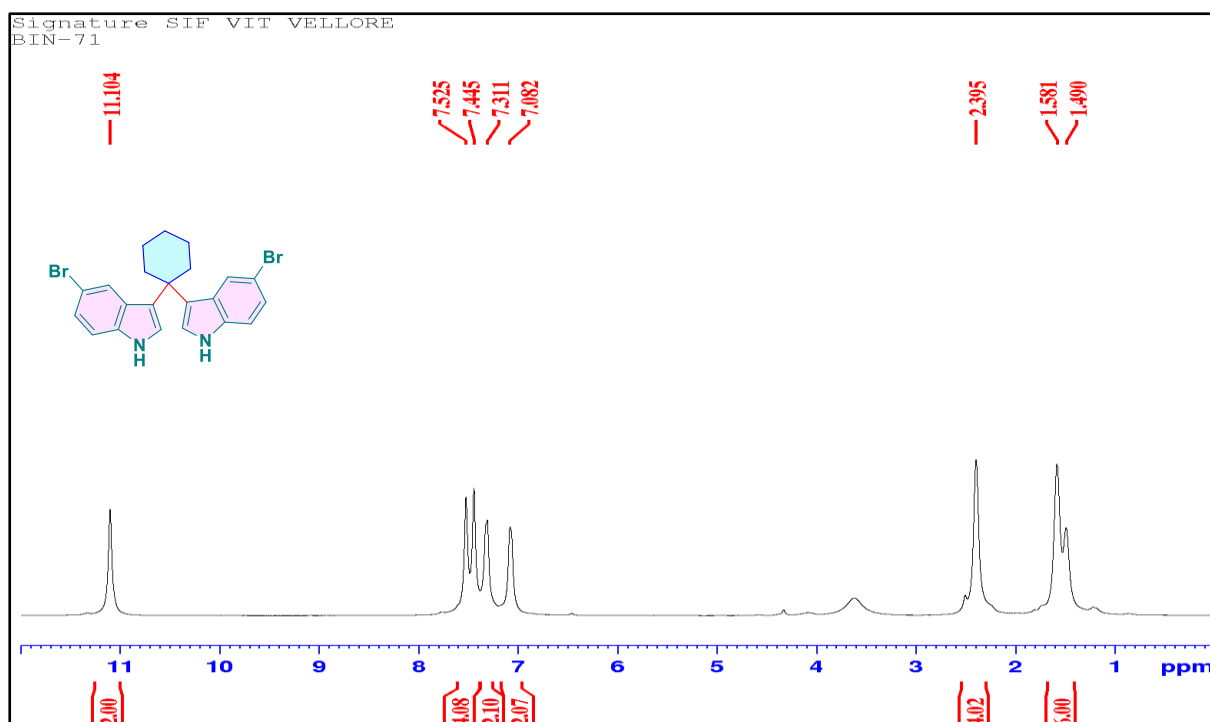

Fig. S71 <sup>1</sup>H NMR spectrum (400 MHz) of 7ei in DMSO-d<sub>6</sub>.

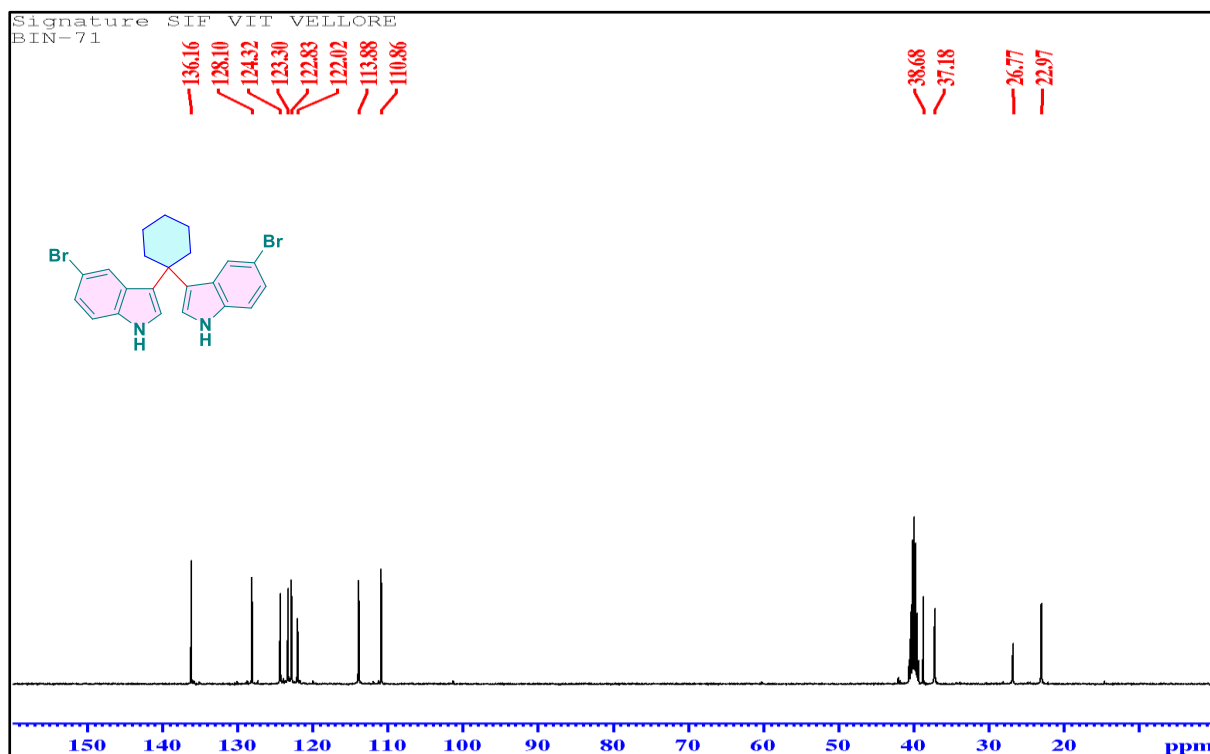

Fig. S72 <sup>13</sup>C NMR spectrum (100 MHz) of 7ei in DMSO-d<sub>6</sub>.

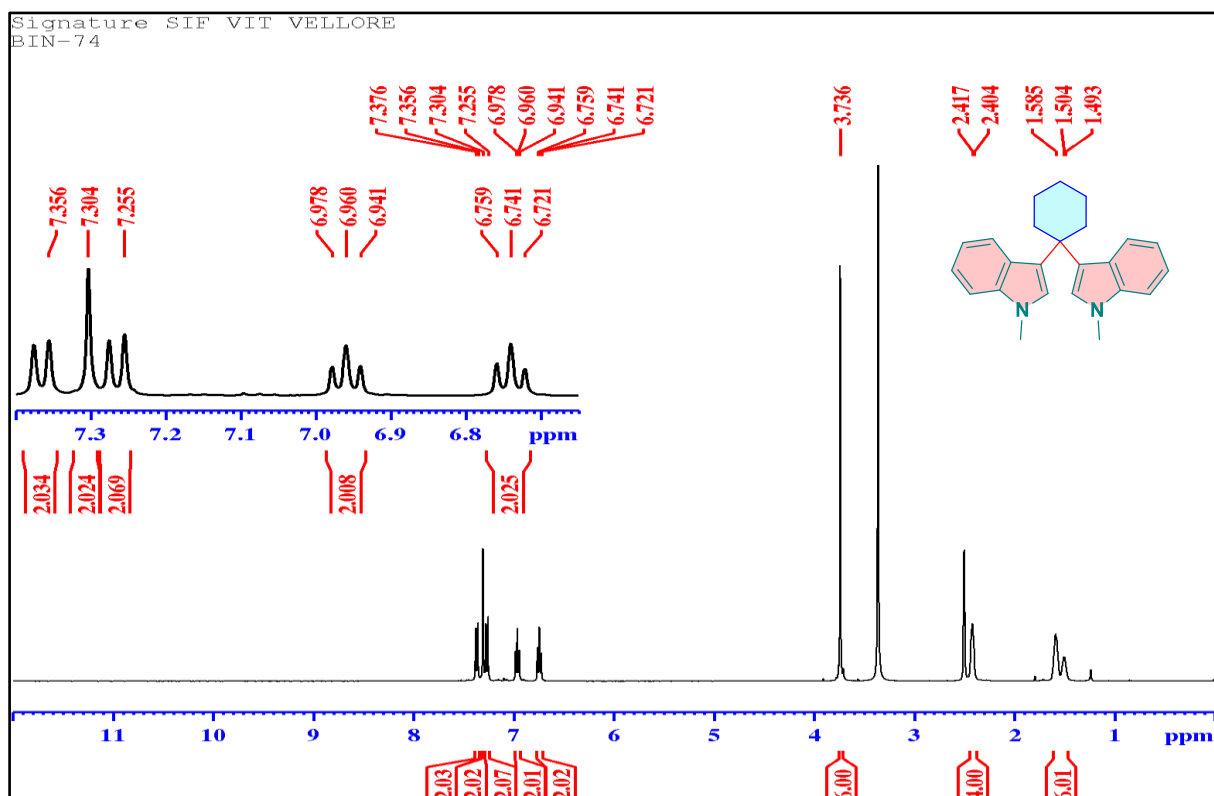

Fig. S73 <sup>1</sup>H NMR spectrum (400 MHz) of 7fi in DMSO-d<sub>6</sub>.

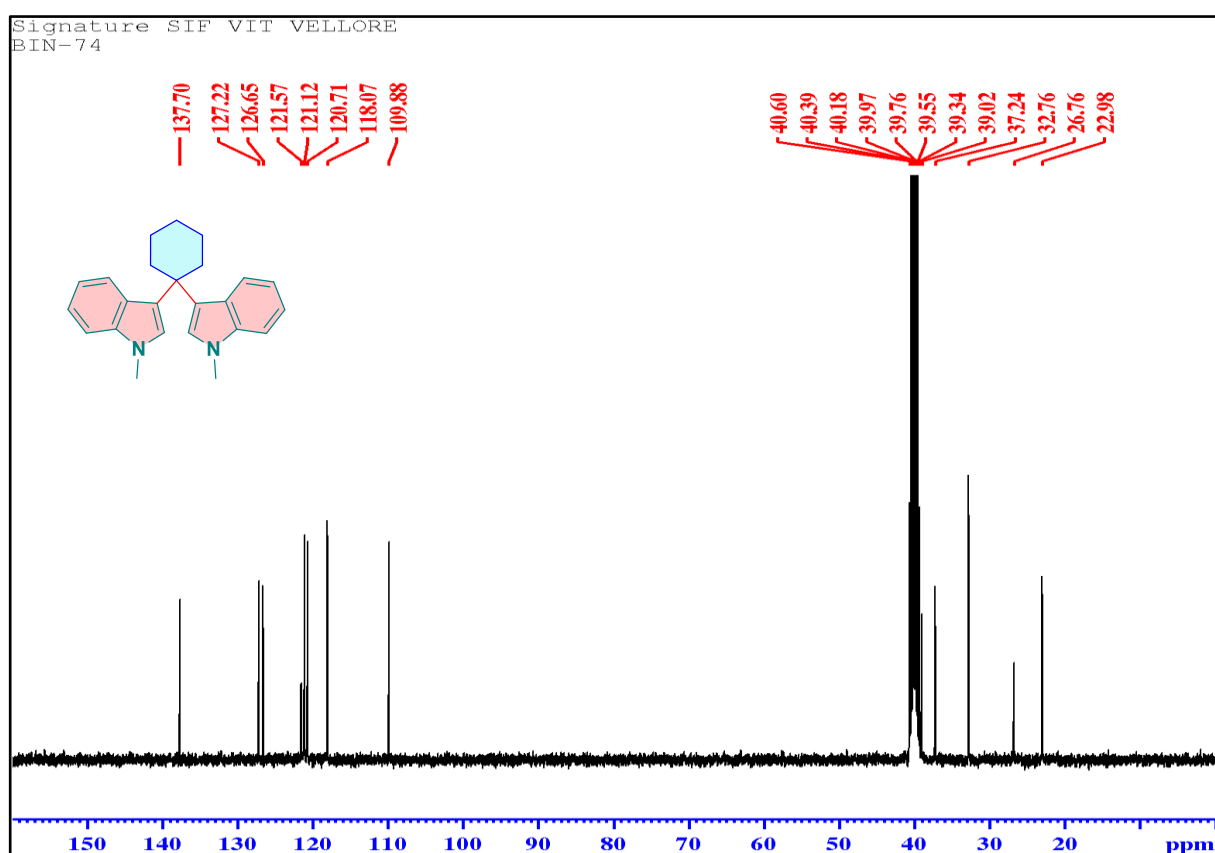

Fig. S74 <sup>13</sup>C NMR spectrum (100 MHz) of 7fi in DMSO-d<sub>6</sub>.

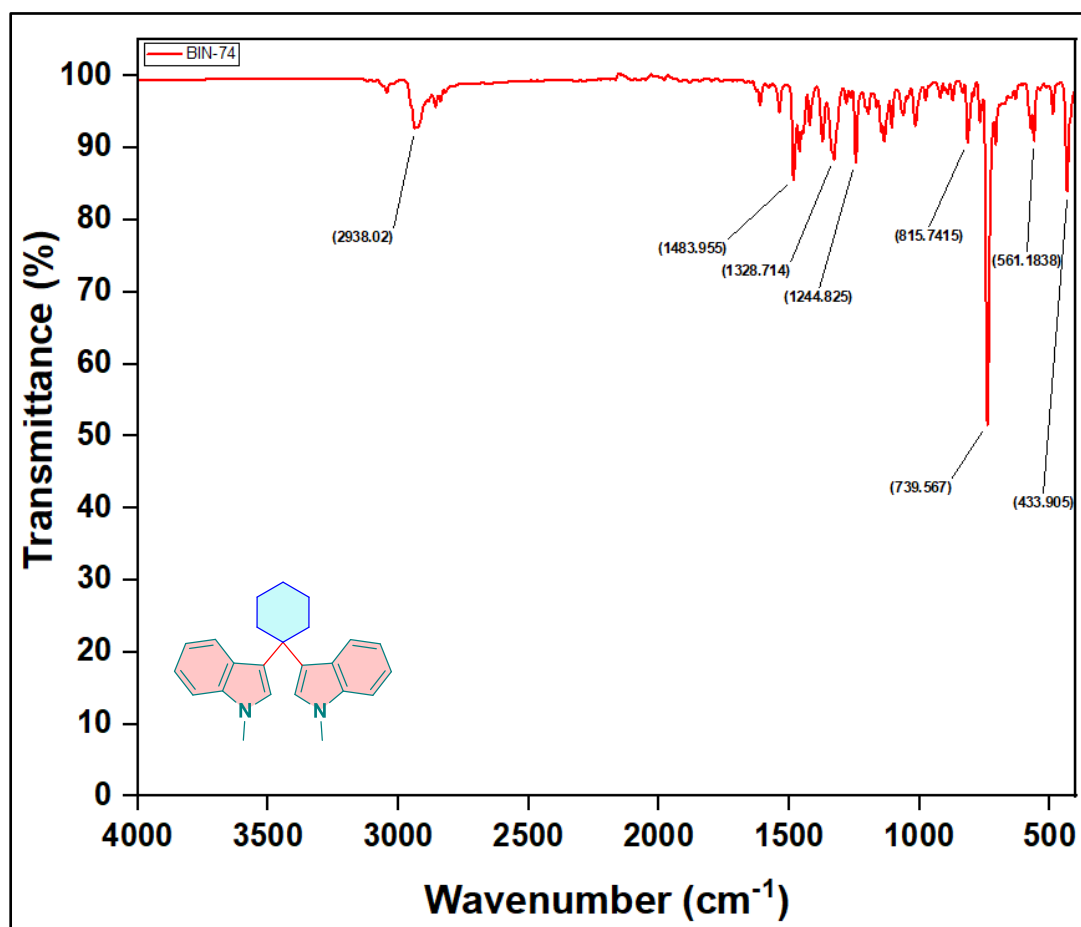

**Fig. S75** FT-IR spectrum of **7fi**.

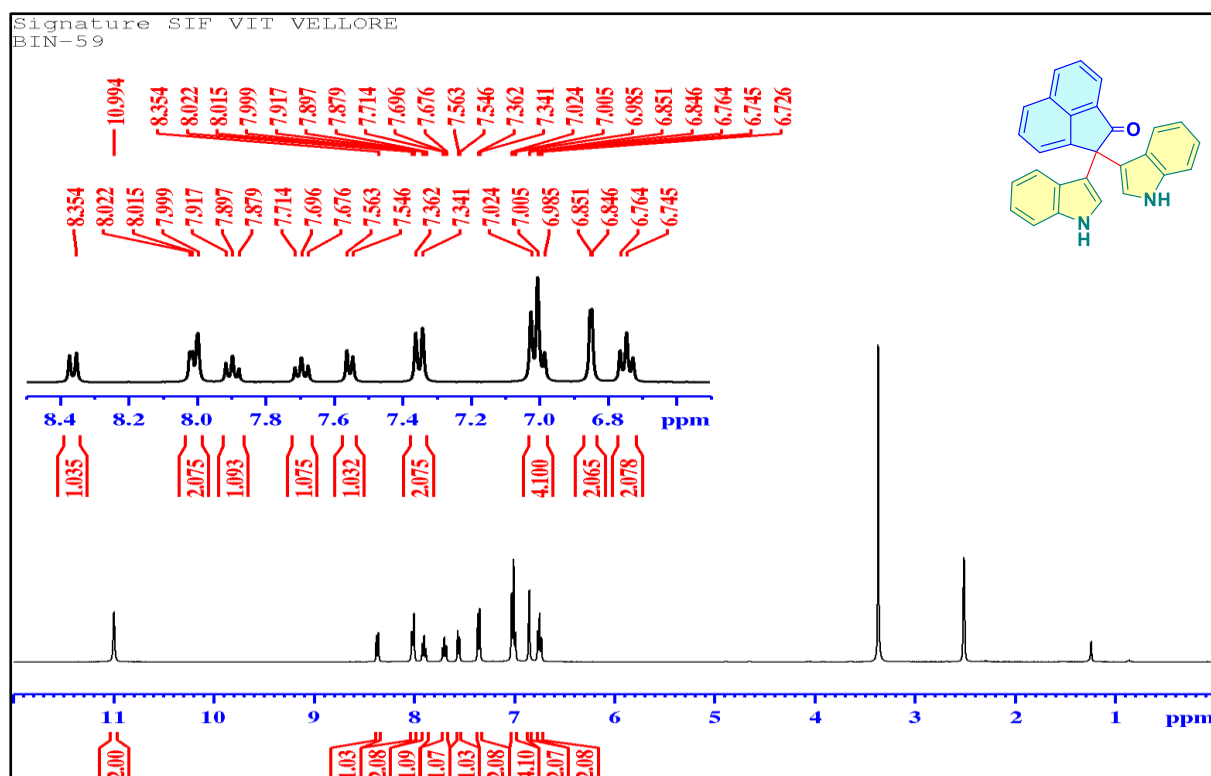

**Fig. S76** <sup>1</sup>H NMR spectrum (400 MHz) of **7aj** in DMSO-d<sub>6</sub>.

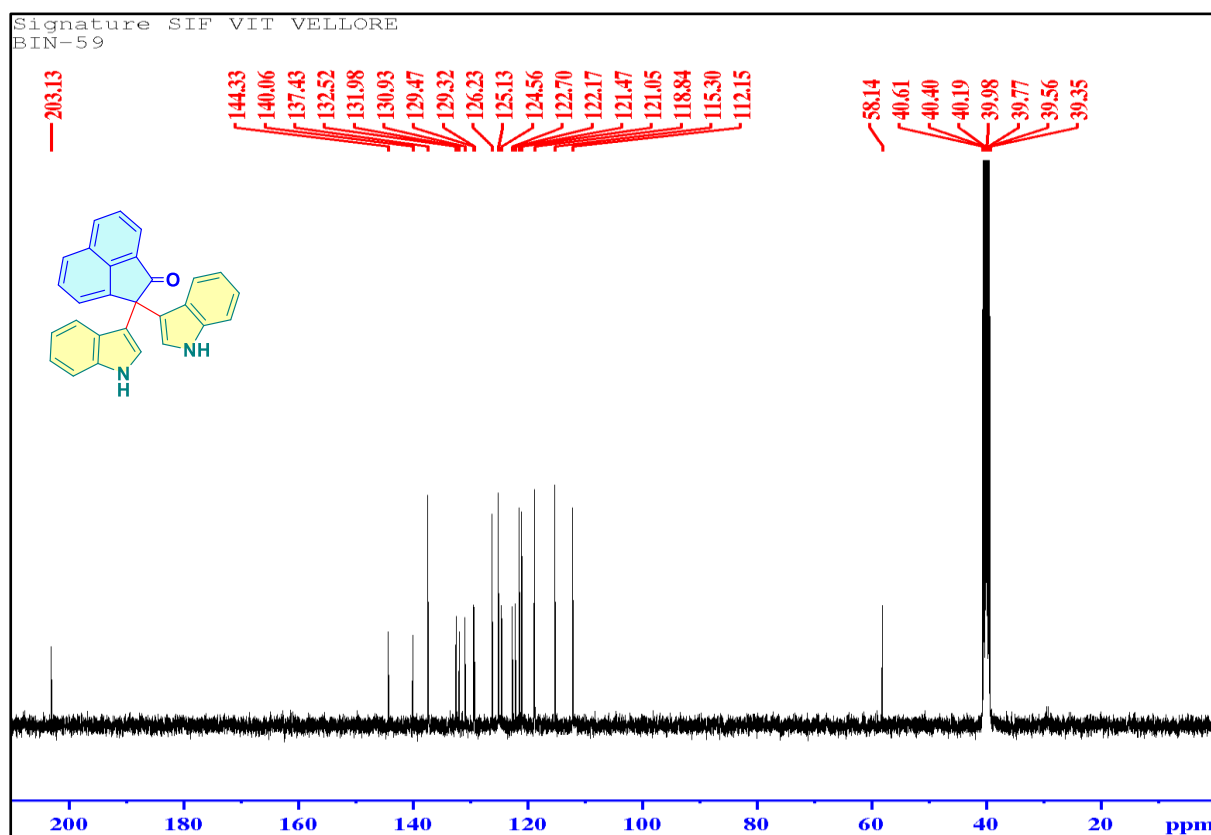

**Fig. S77** <sup>13</sup>C NMR spectrum (100 MHz) of **7aj** in DMSO-d<sub>6</sub>.

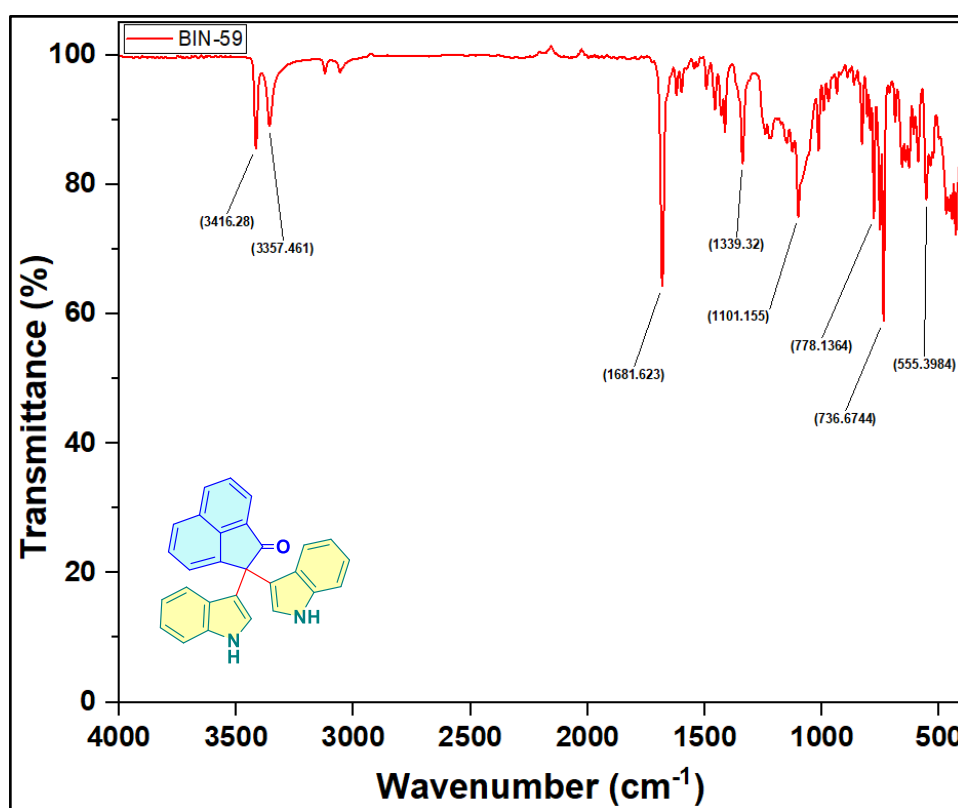

**Fig. S78** FT-IR spectrum of **7aj**.

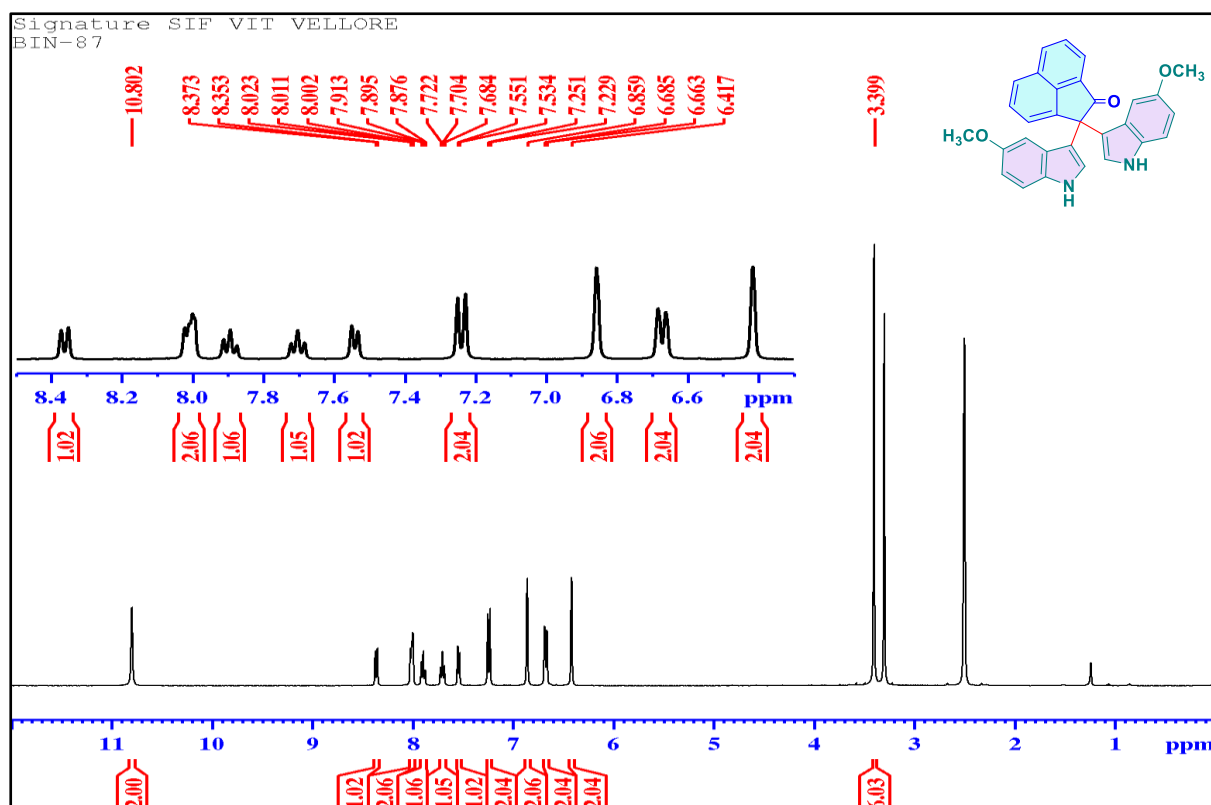

Fig. S79 <sup>1</sup>H NMR spectrum (400 MHz) of **7cj** in DMSO-d<sub>6</sub>.

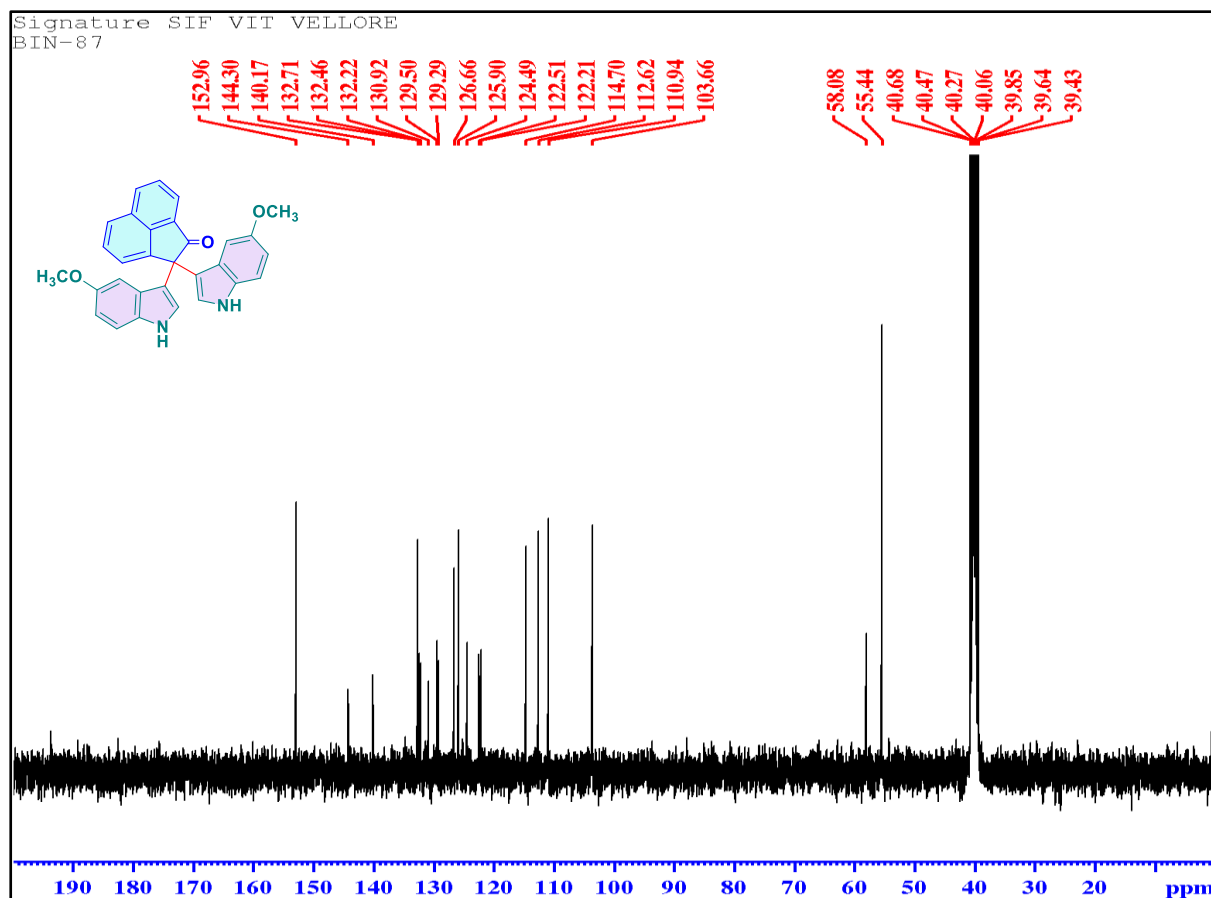

Fig. S80 <sup>13</sup>C NMR spectrum (100 MHz) of **7cj** in DMSO-d<sub>6</sub>.

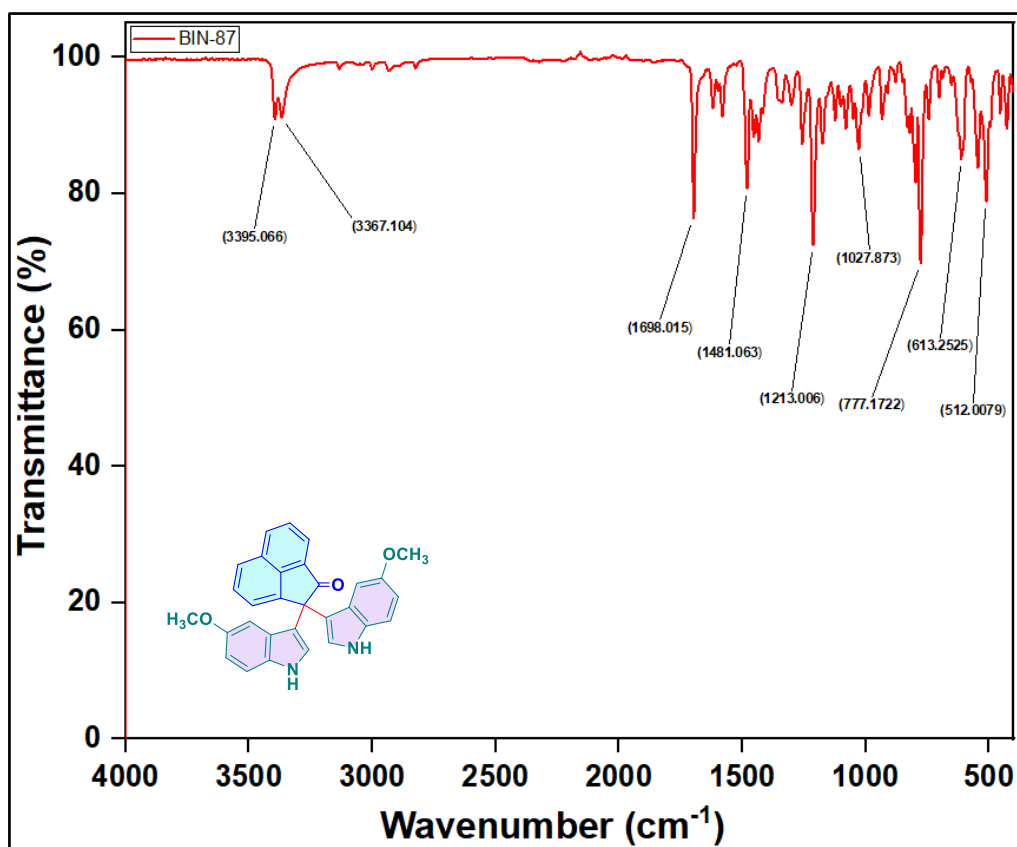

Fig. S81 FT-IR spectrum of 7cj.

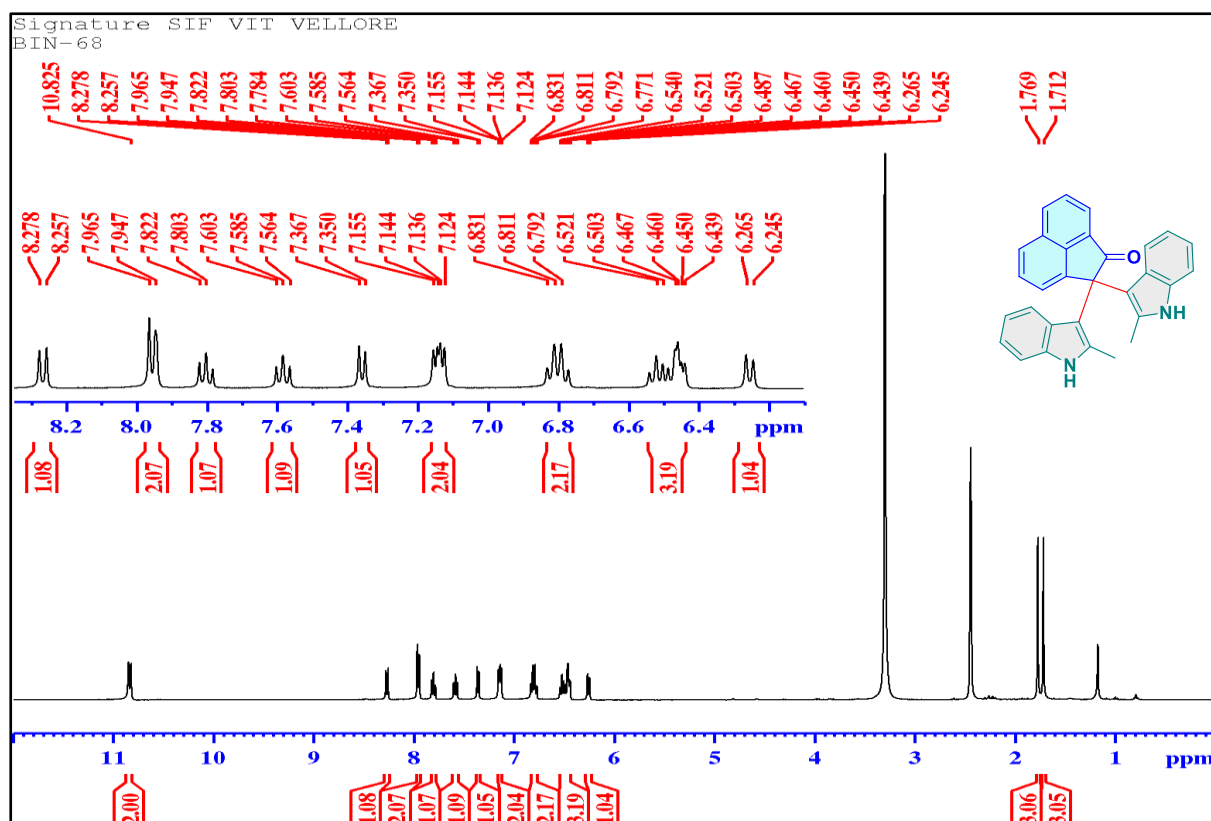

**Fig. S82**  $^1\text{H}$  NMR spectrum (400 MHz) of **7dj** in  $\text{DMSO-d}_6$ .

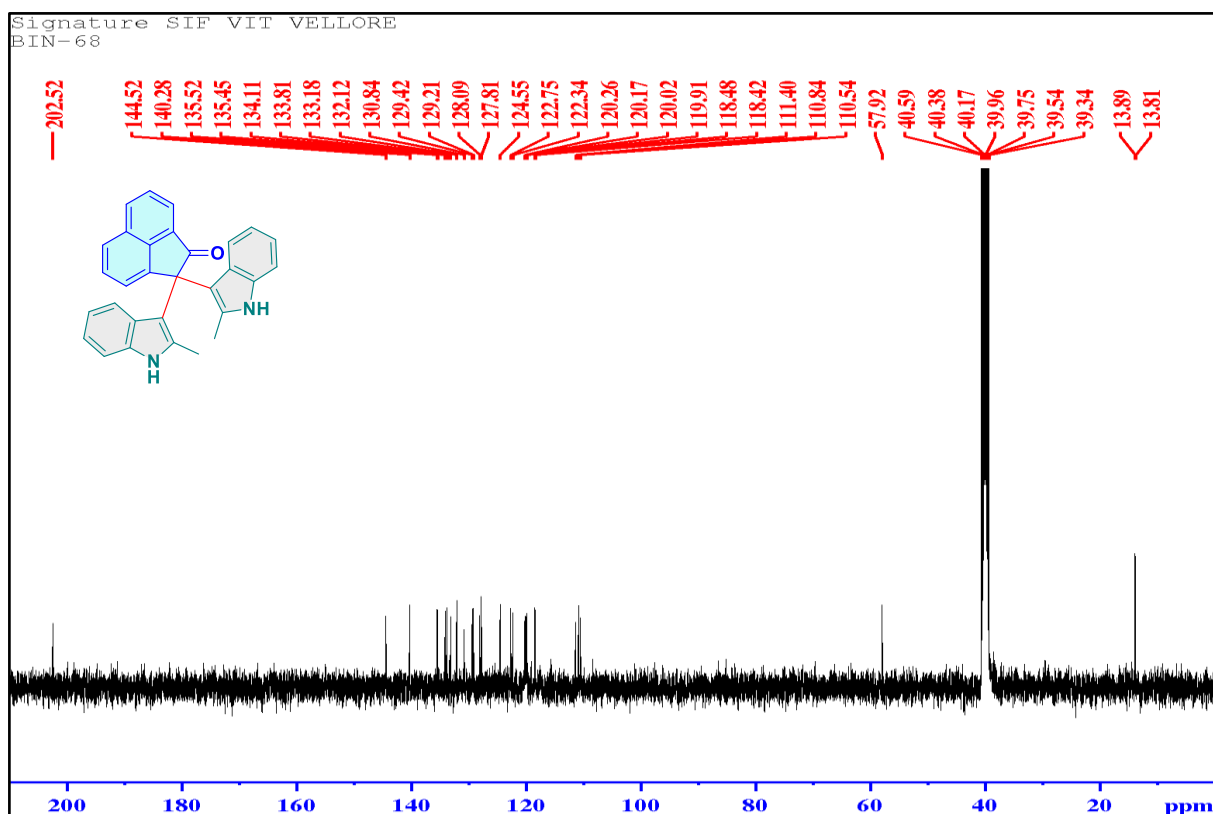

**Fig. S83**  $^{13}\text{C}$  NMR spectrum (100 MHz) of **7dj** in  $\text{DMSO-d}_6$ .

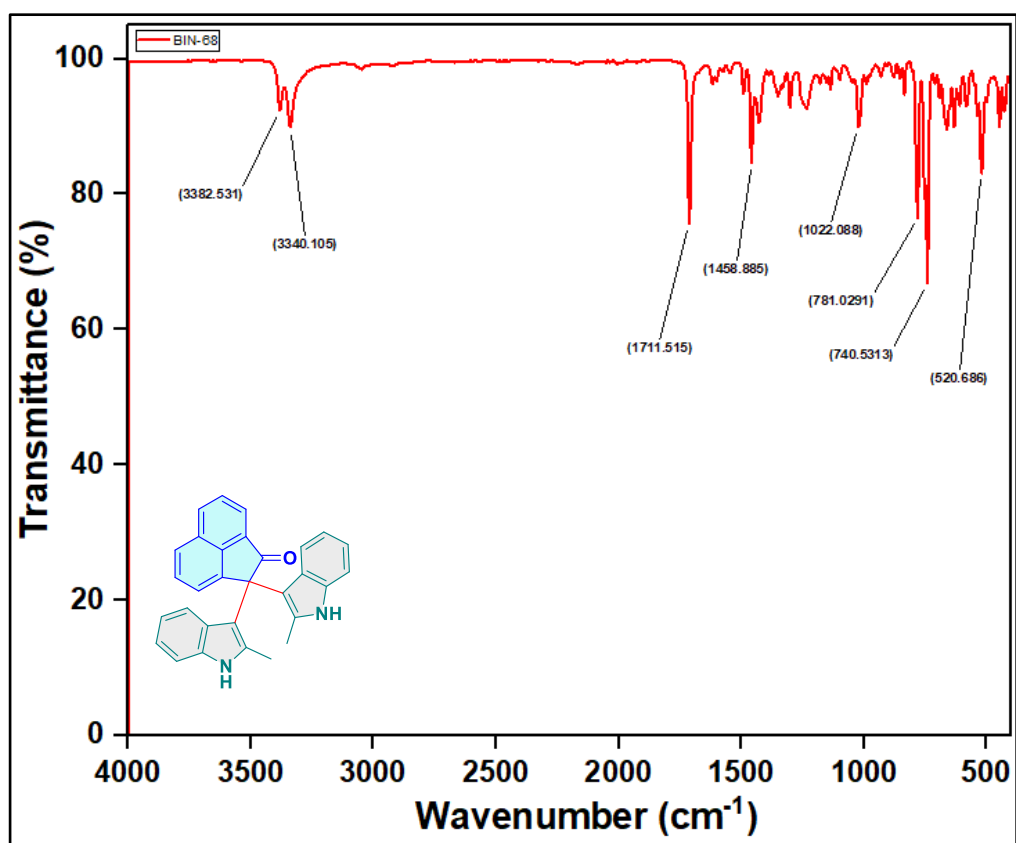

Fig. S84 FT-IR spectrum of 7dj.

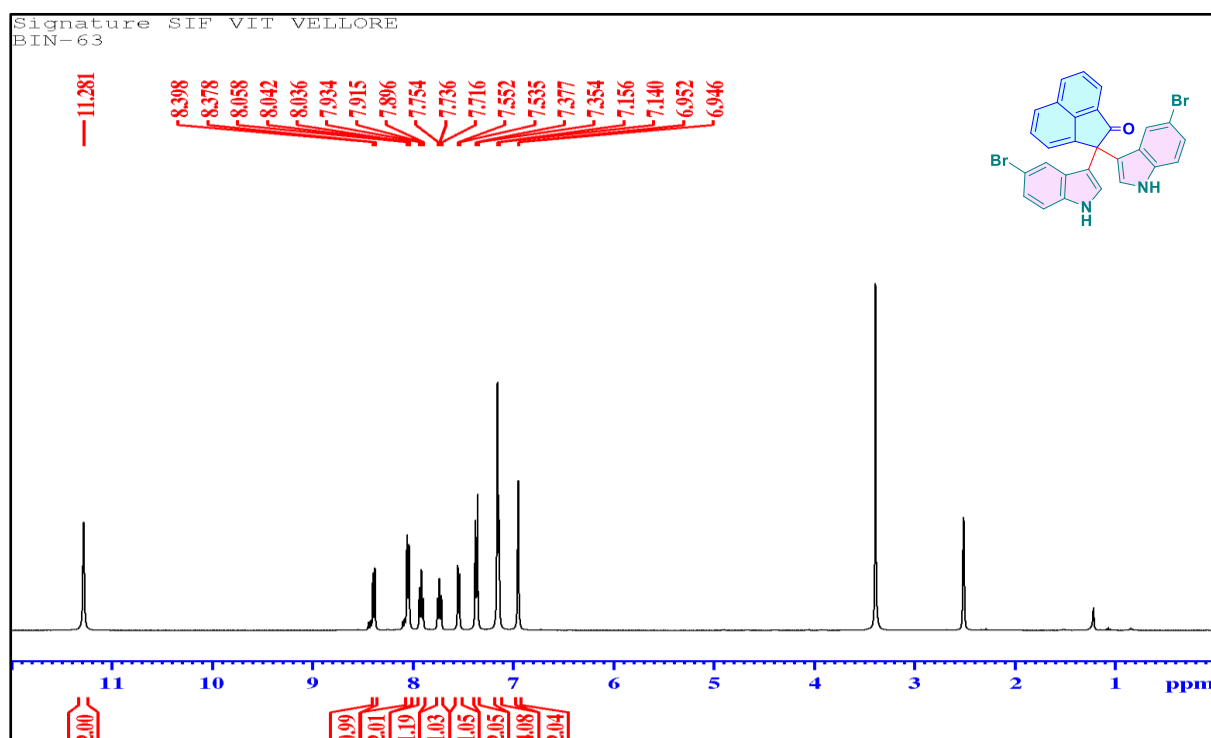

Fig. S85  $^1\text{H}$  NMR spectrum (400 MHz) of 7ej in DMSO- $\text{d}_6$ .

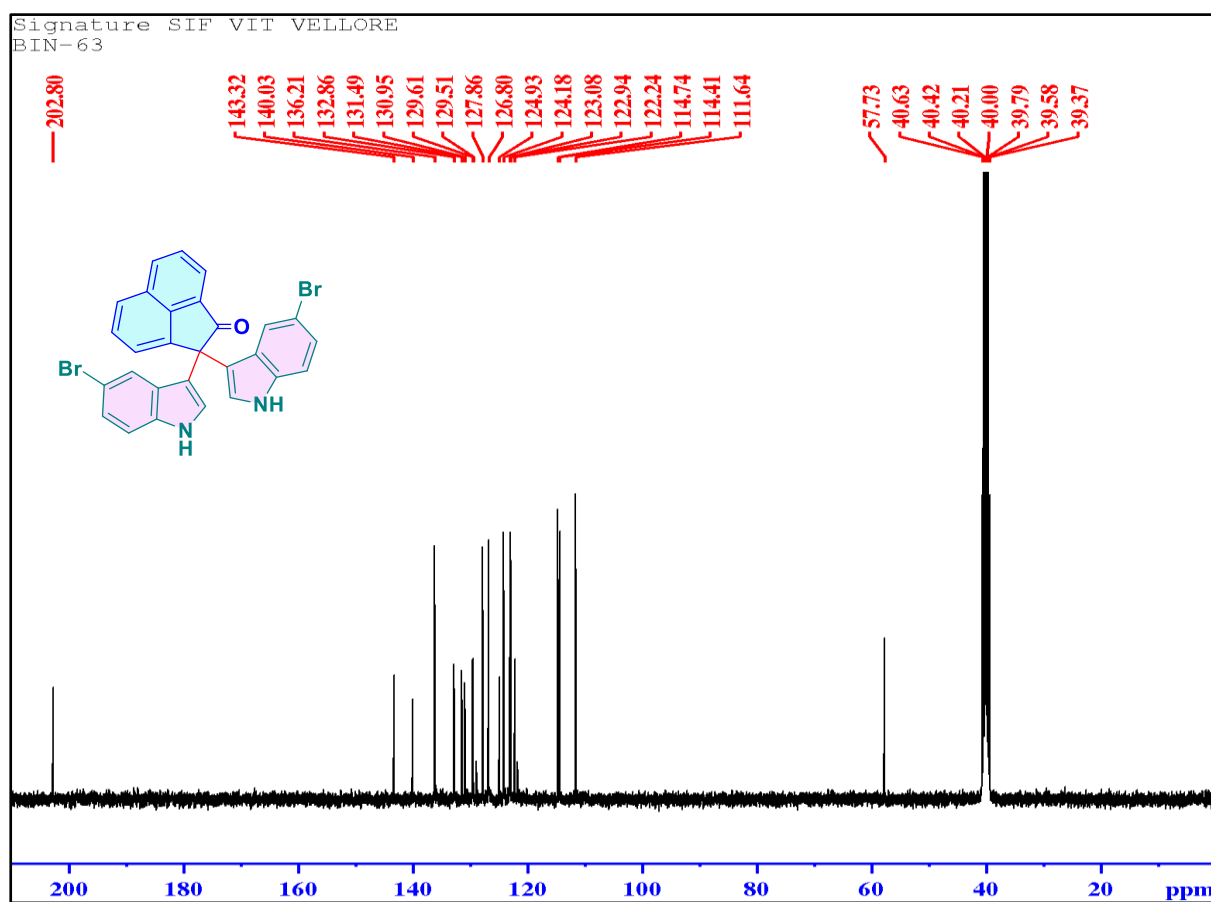

Fig. S86  $^{13}\text{C}$  NMR spectrum (100 MHz) of 7ej in DMSO- $\text{d}_6$ .

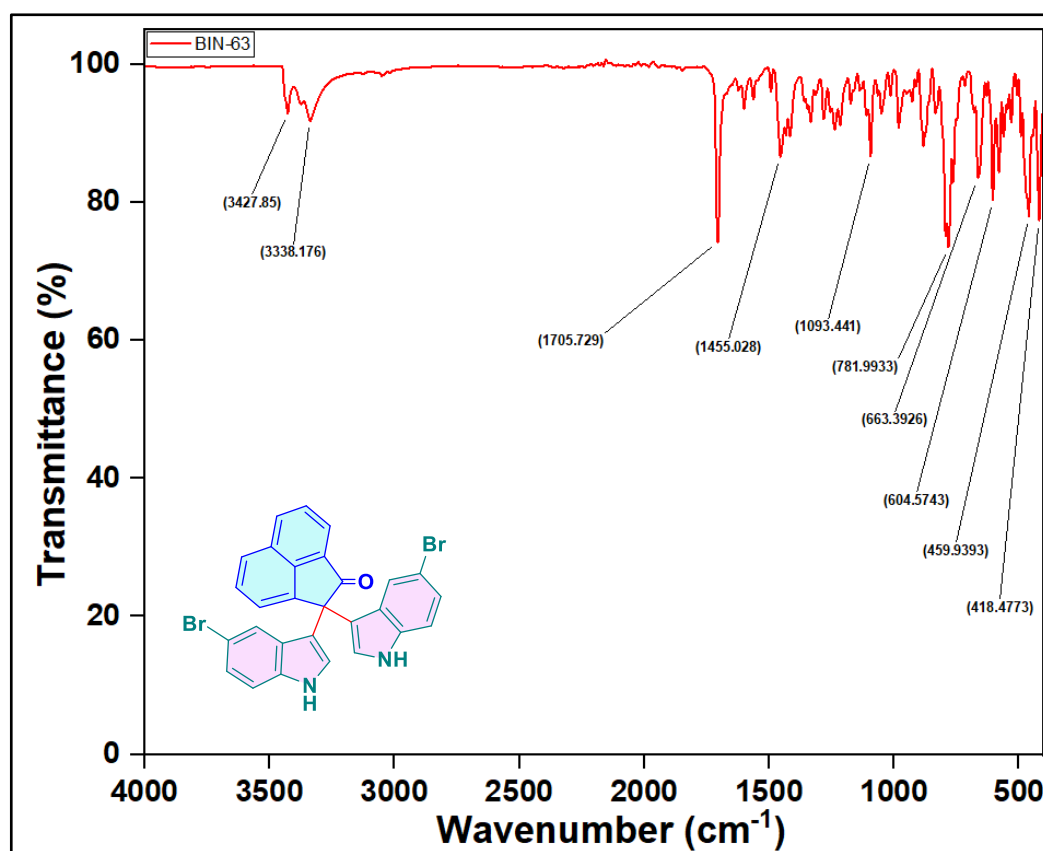

Fig. S87 FT-IR spectrum of 7ej.

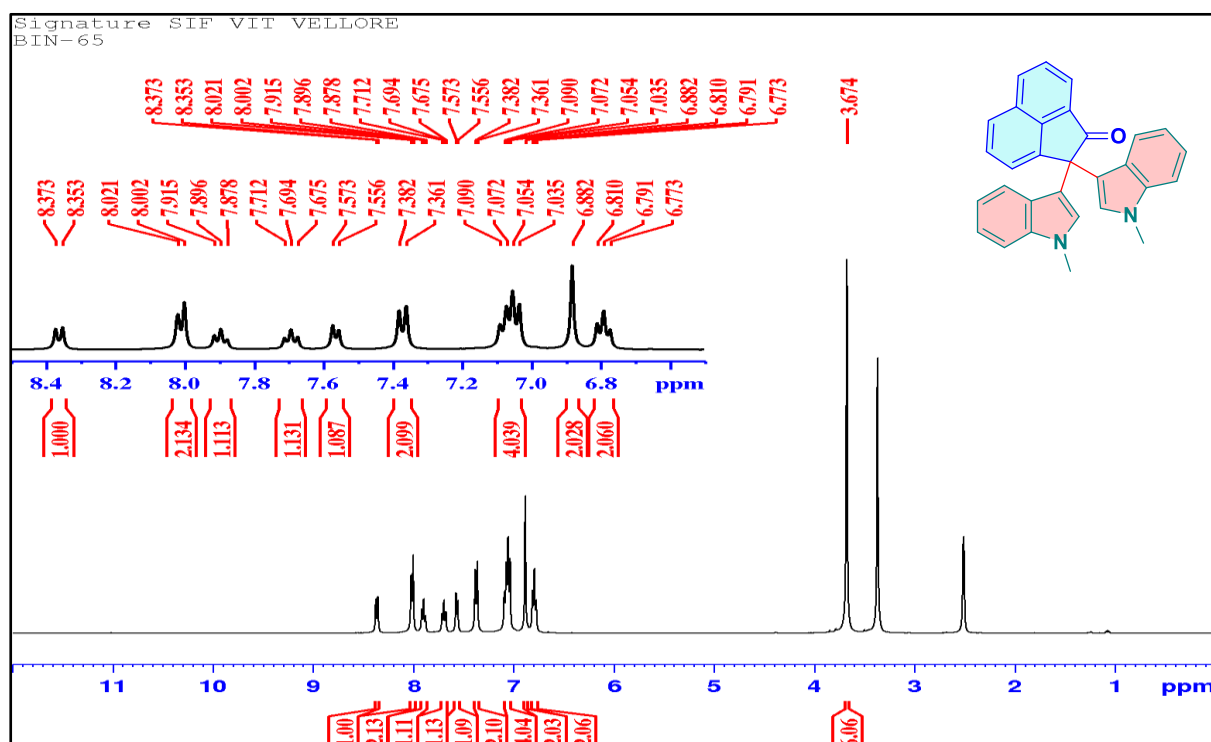

Fig. S88 <sup>1</sup>H NMR spectrum (400 MHz) of **7fj** in DMSO-d<sub>6</sub>.

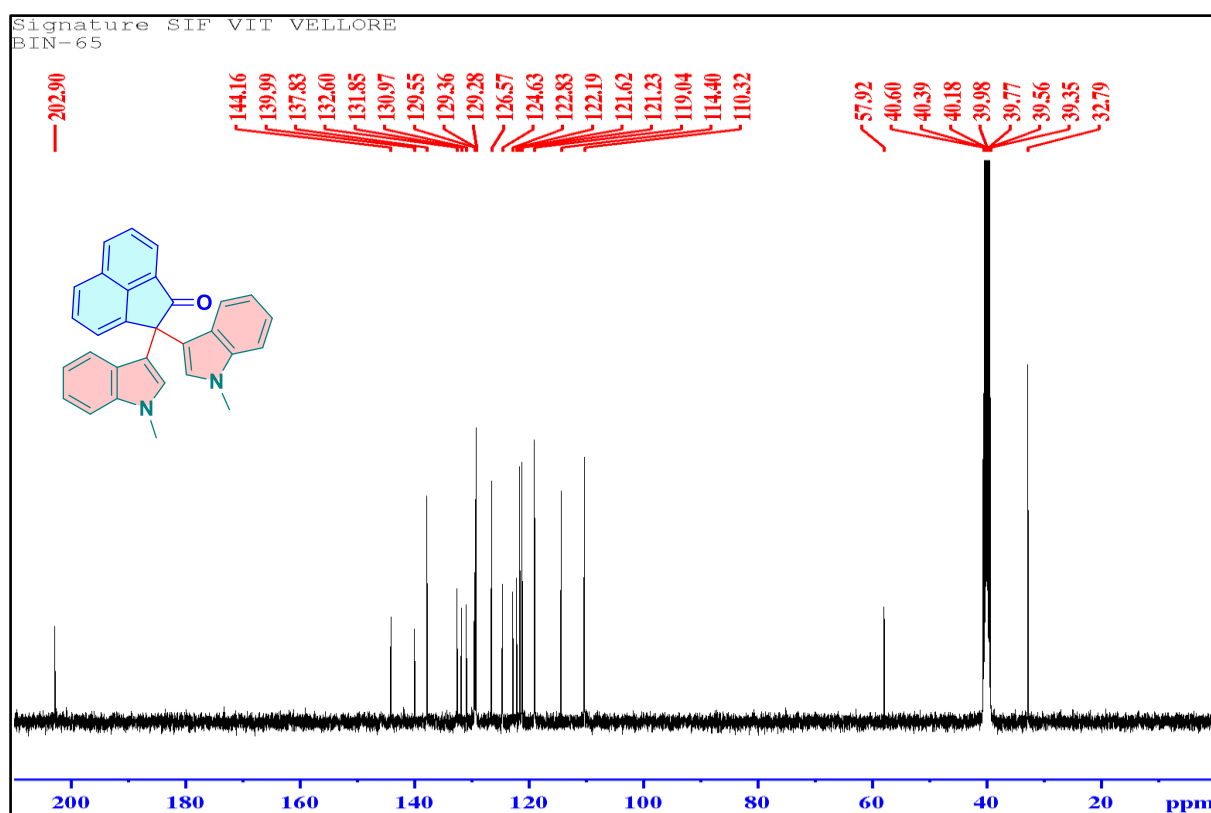

Fig. S89 <sup>13</sup>C NMR spectrum (100 MHz) of **7fj** in DMSO-d<sub>6</sub>.

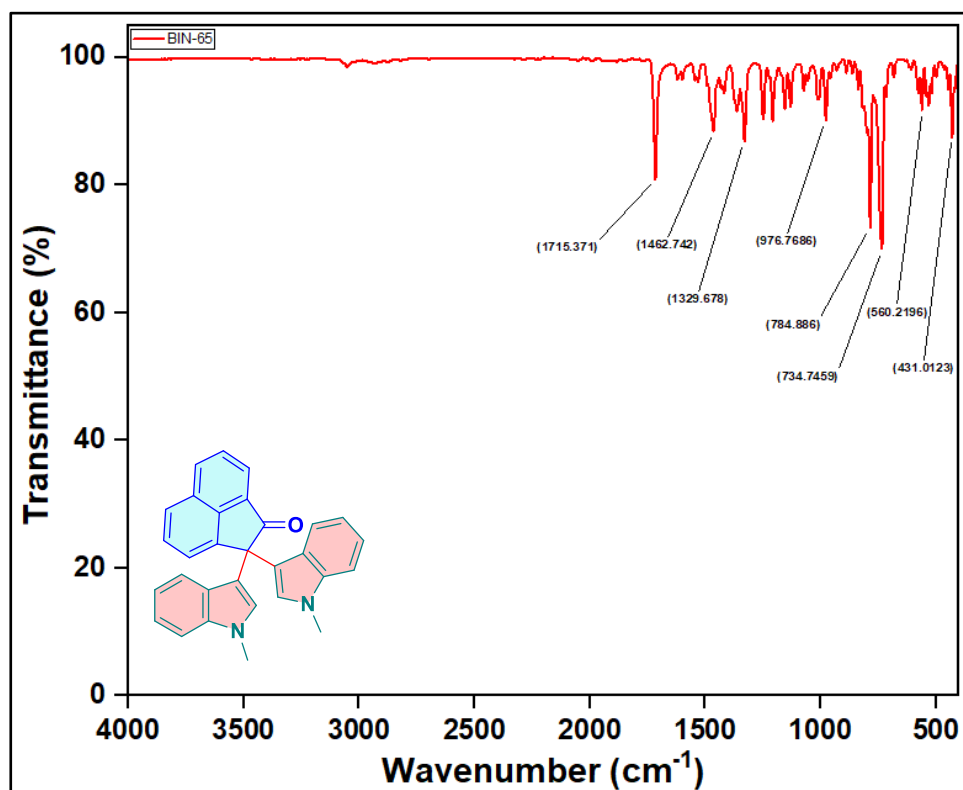

Fig. S90 FT-IR spectrum of 7fj.

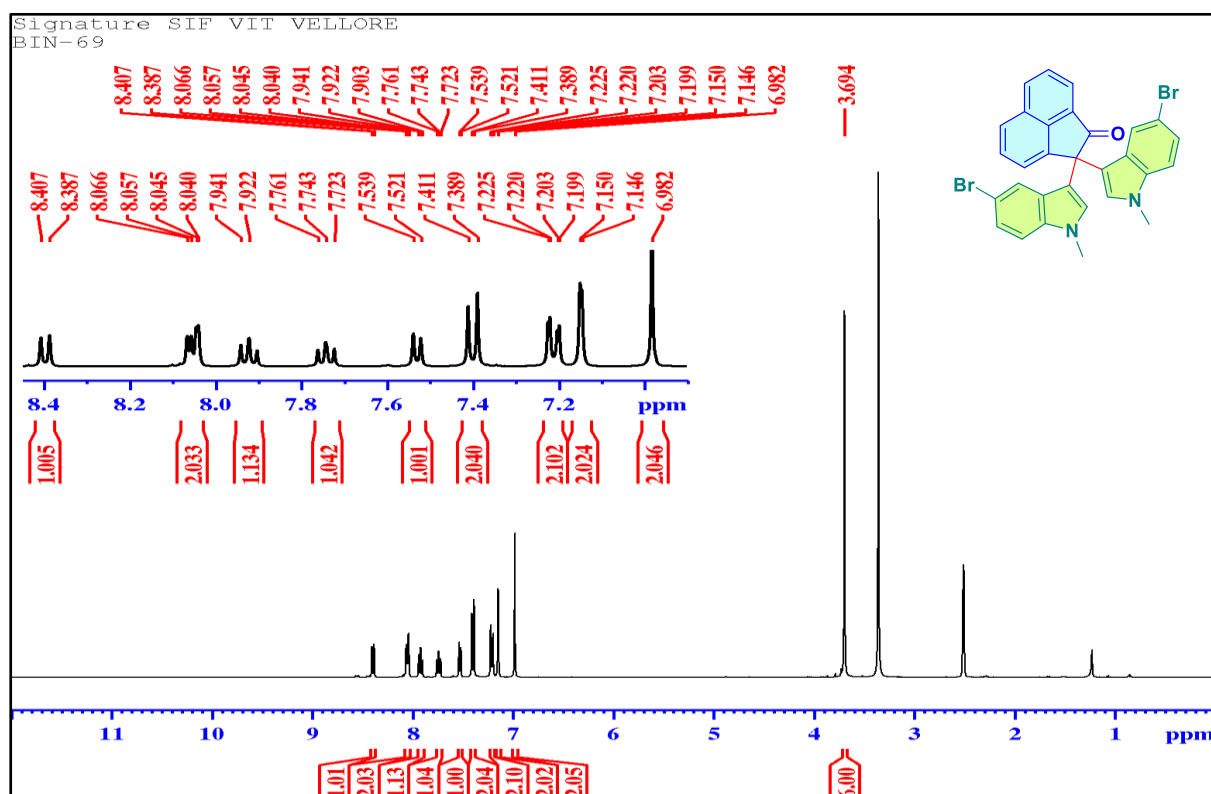

Fig. S91 <sup>1</sup>H NMR spectrum (400 MHz) of **7gj** in DMSO-d<sub>6</sub>.

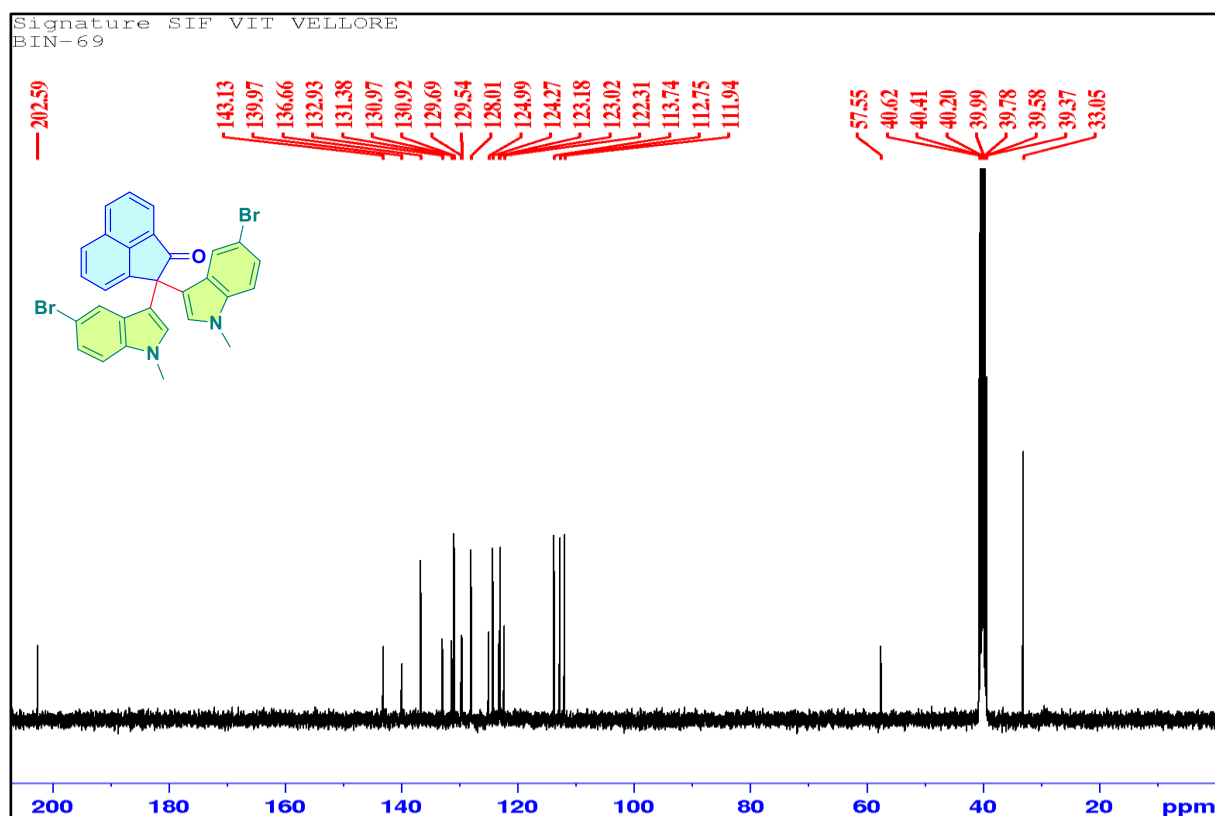

Fig. S92 <sup>13</sup>C NMR spectrum (100 MHz) of **7gj** in DMSO-d<sub>6</sub>.

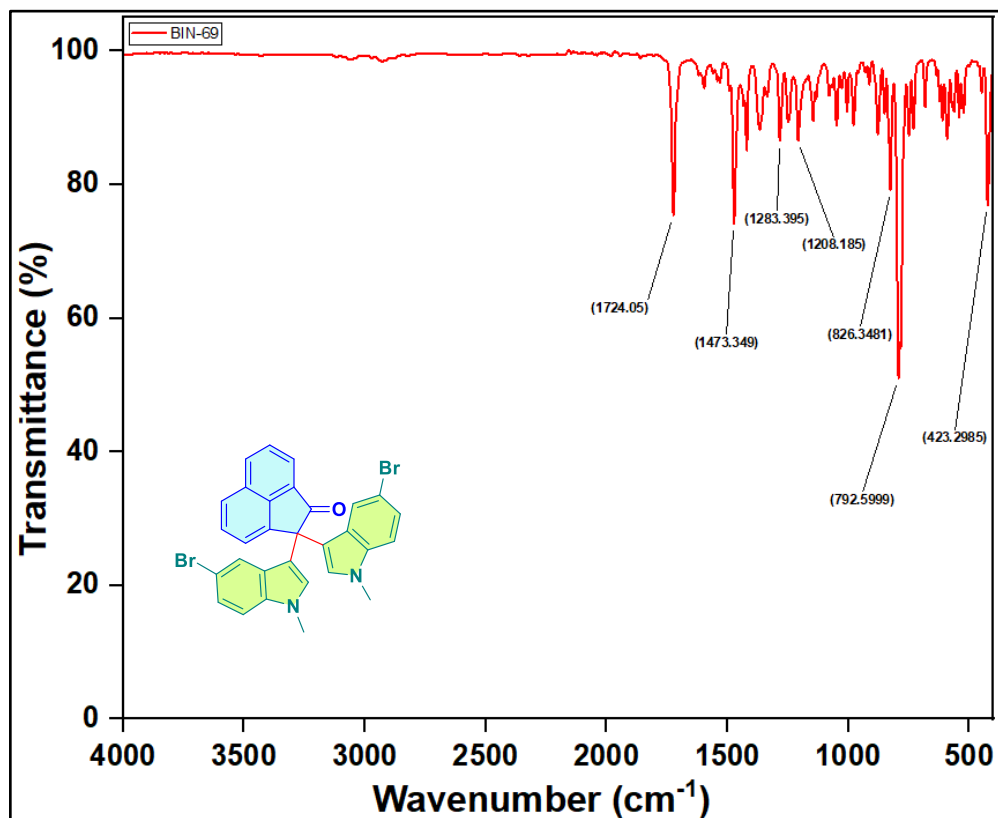

Fig. S93 FT-IR spectrum of 7gj.

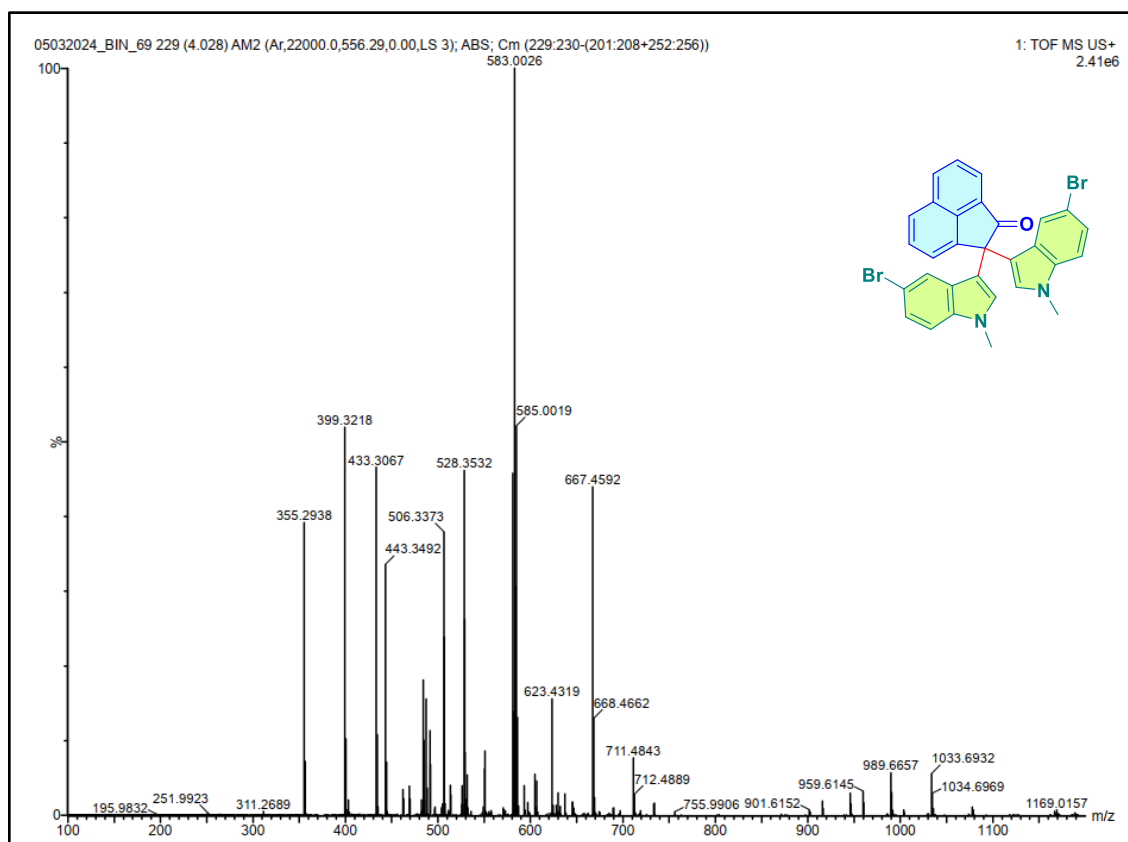

Fig. S94 HR-MS spectrum of 7gj.

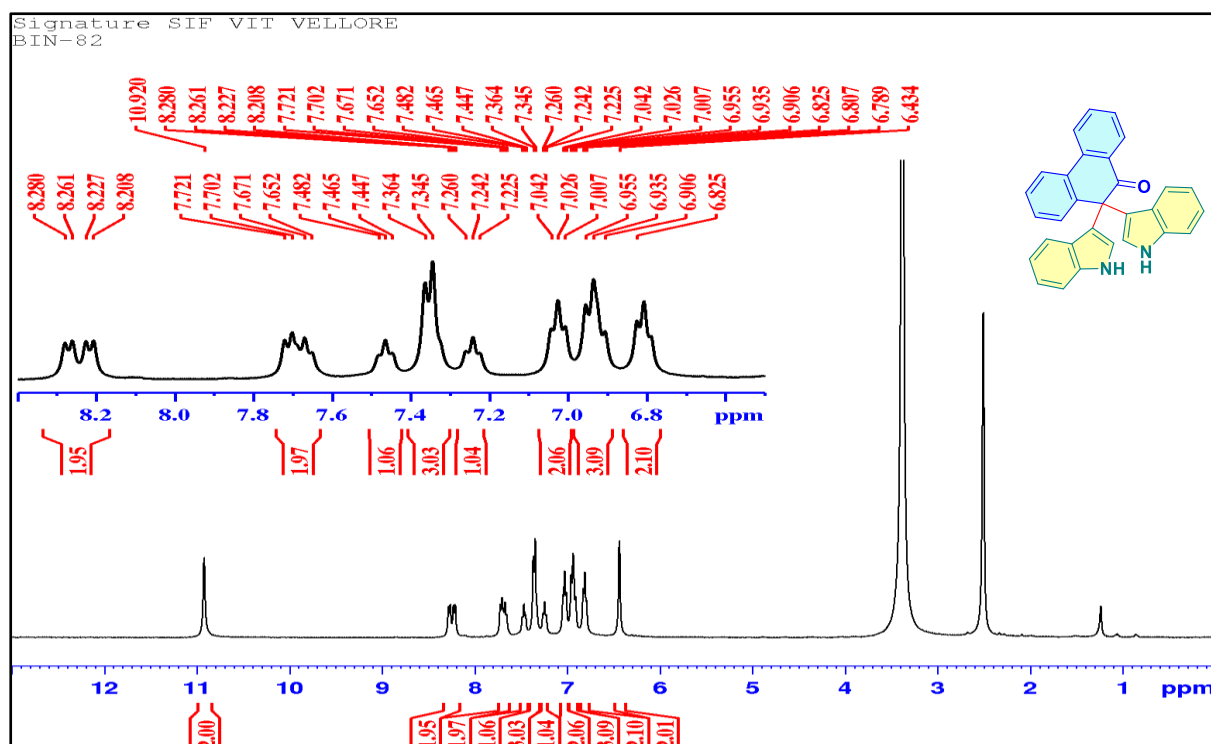

Fig. S95 <sup>1</sup>H NMR spectrum (400 MHz) of **7gk** in DMSO-d<sub>6</sub>.

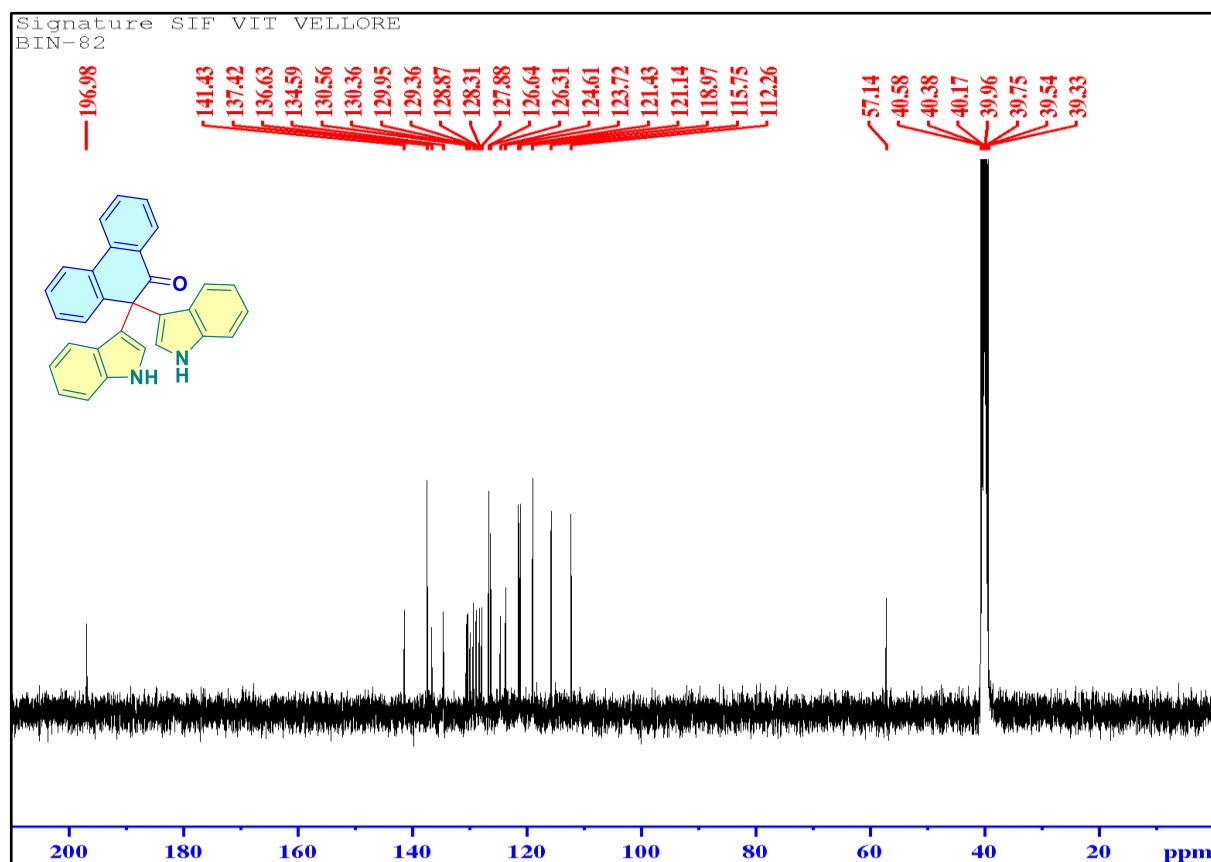

Fig. S96 <sup>13</sup>C NMR spectrum (100 MHz) of **7gk** in DMSO-d<sub>6</sub>.

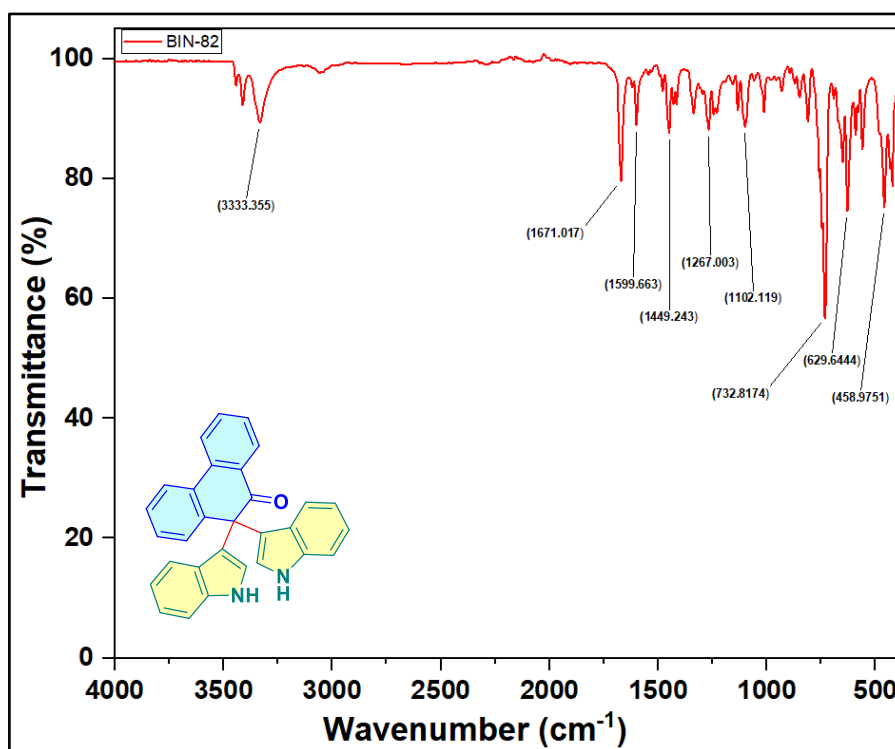

Fig. S97 FT-IR spectrum of 7gk.

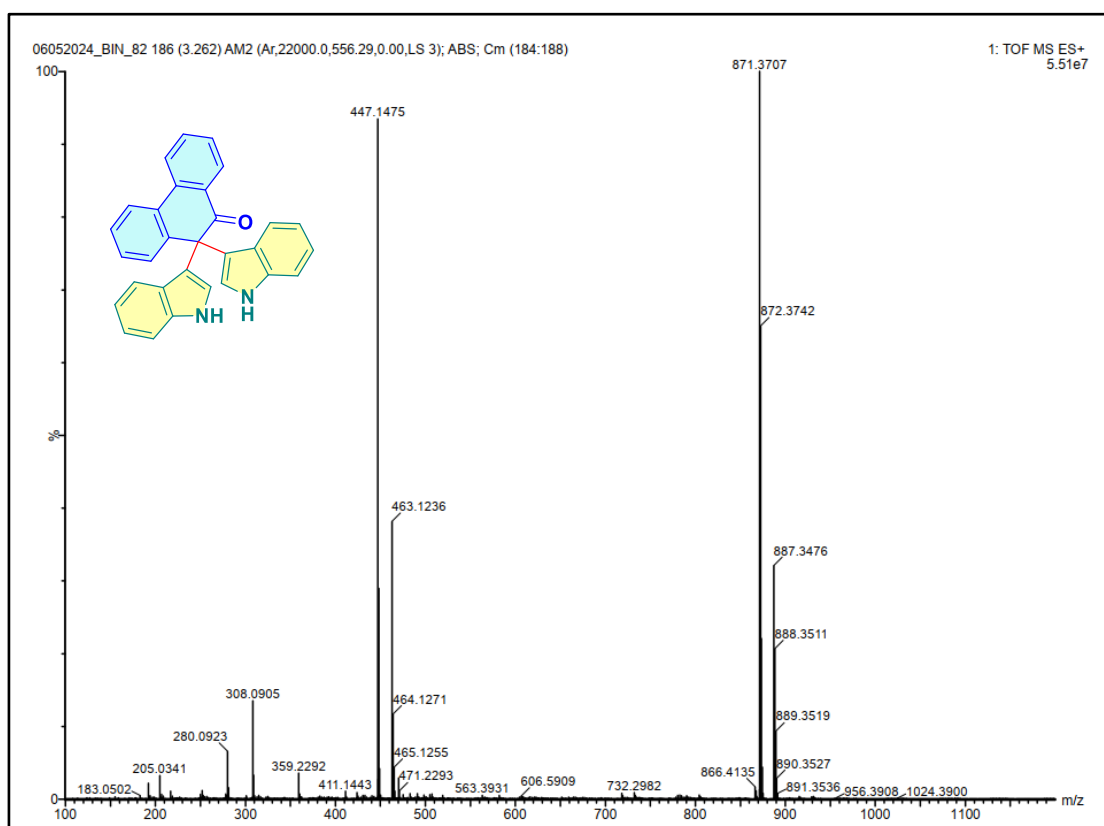

Fig. S98 HR-MS spectrum of 7gk.

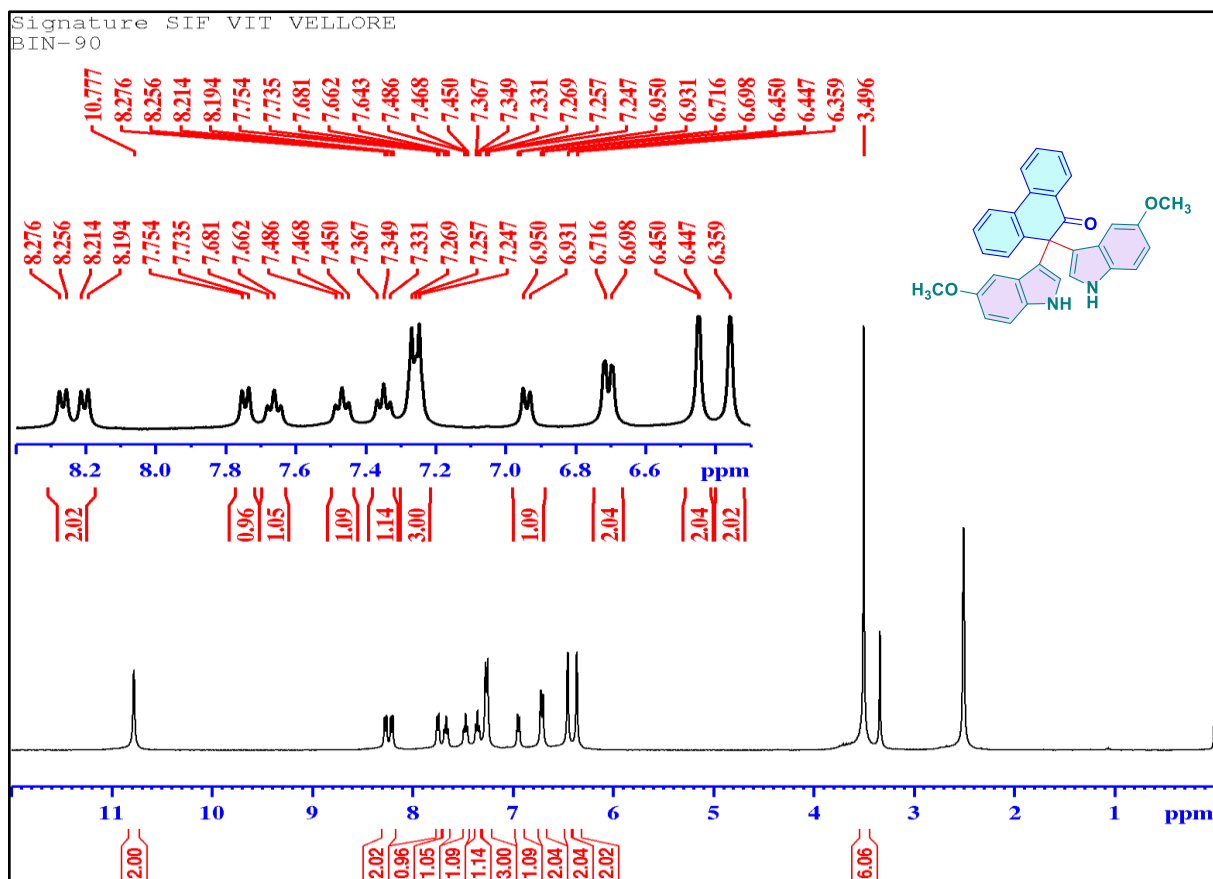

Fig. S99 <sup>1</sup>H NMR spectrum (400 MHz) of 7ck in DMSO-d<sub>6</sub>.

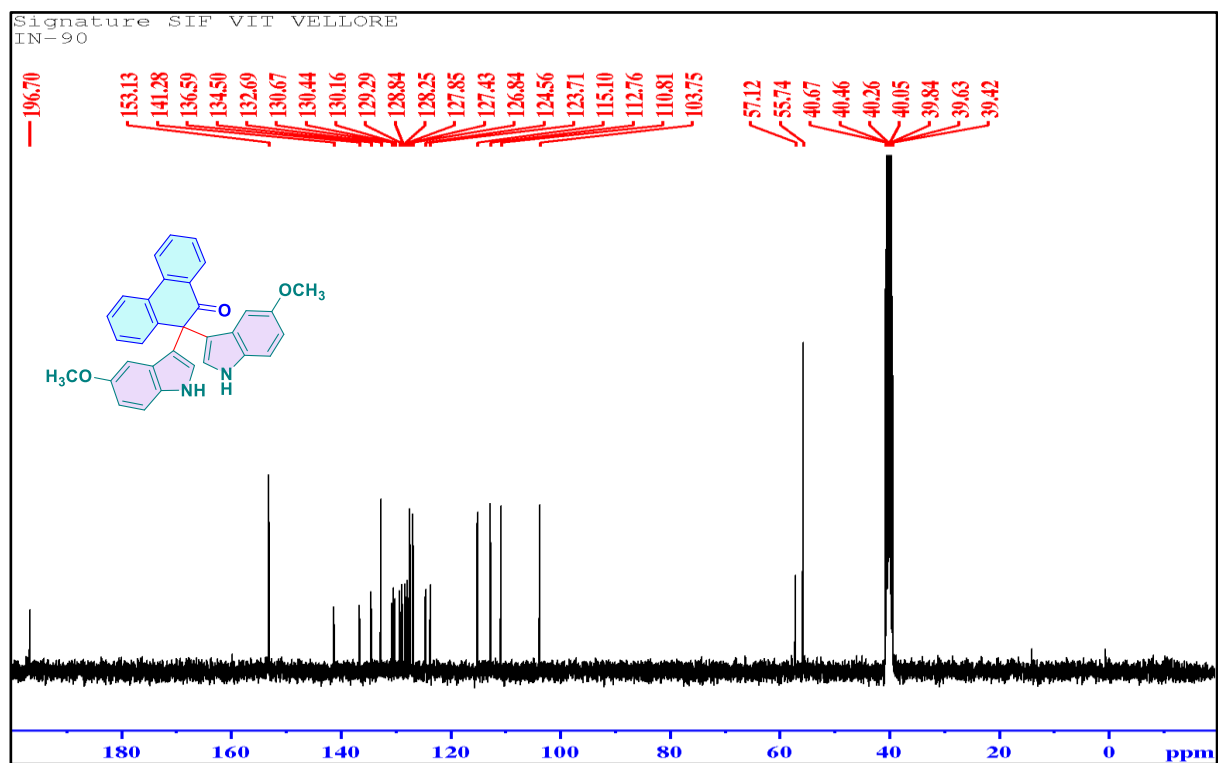

Fig. S100 <sup>13</sup>C NMR spectrum (100 MHz) of 7ck in DMSO-d<sub>6</sub>.

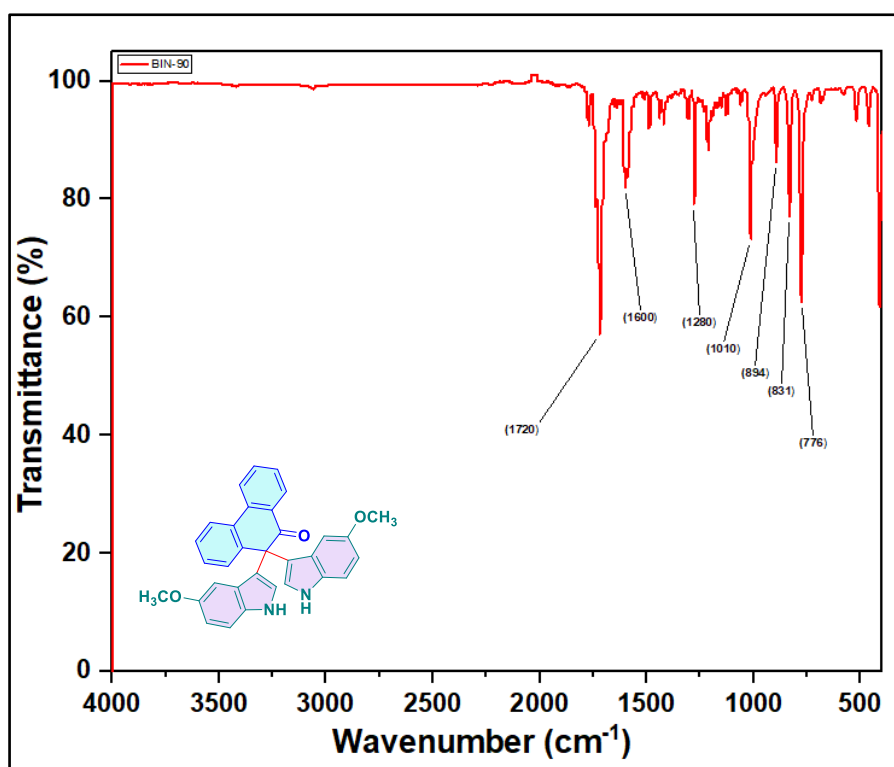

Fig. S101 FT-IR spectrum of 7ck.

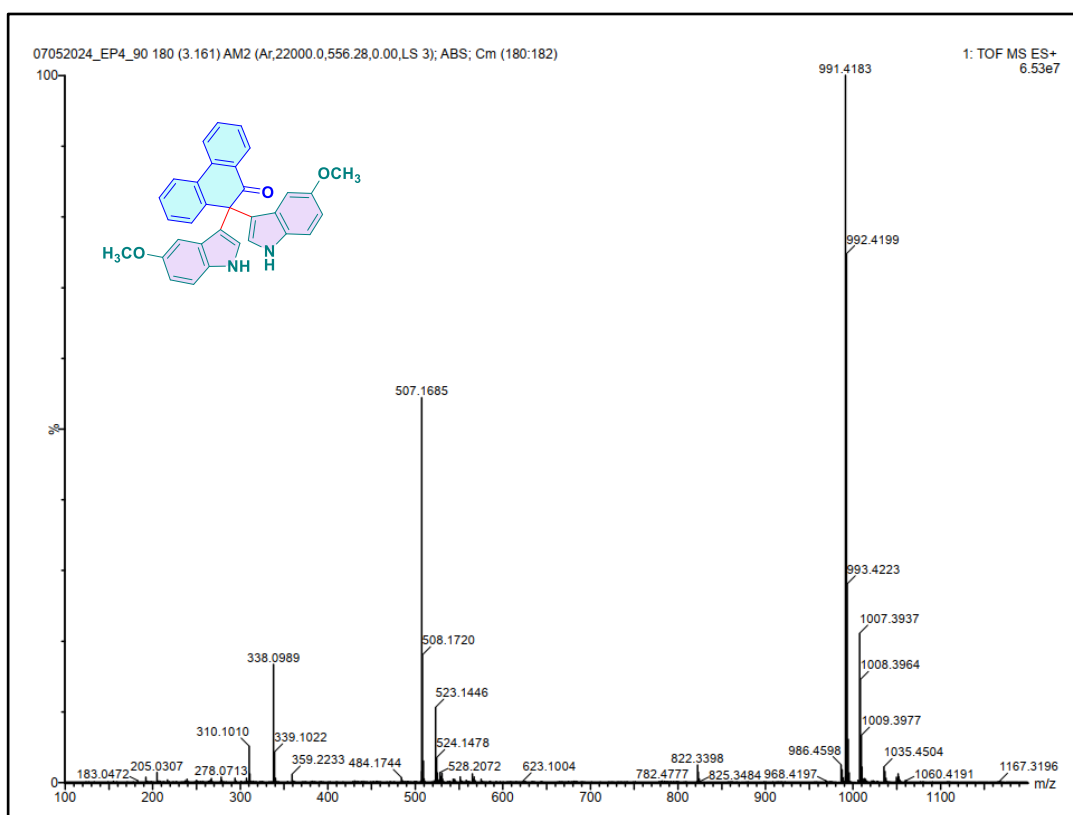

Fig. S102 HR-MS spectrum of 7ck.

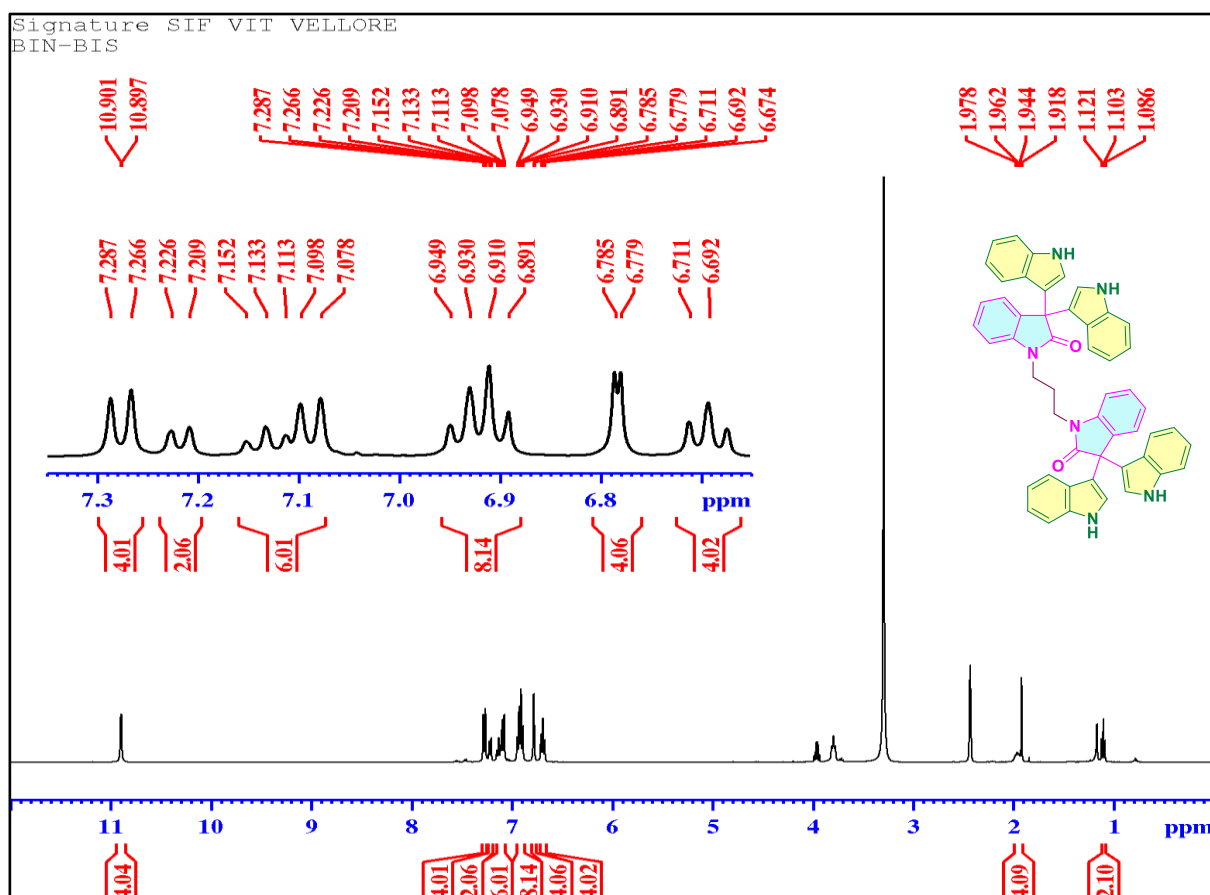

**Fig. S103** <sup>1</sup>H NMR spectrum (400 MHz) of **10aa** in DMSO-d<sub>6</sub>.

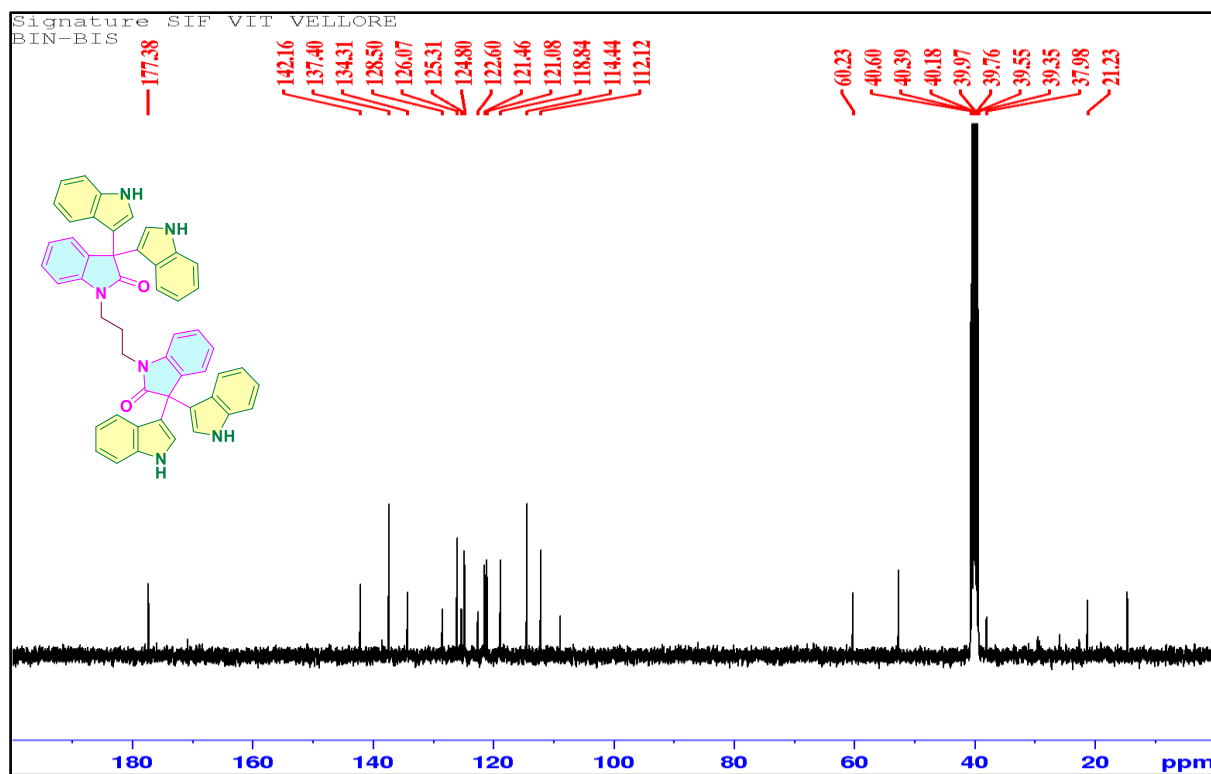

**Fig. S104** <sup>13</sup>C NMR spectrum (100 MHz) of **10aa** in DMSO-d<sub>6</sub>.

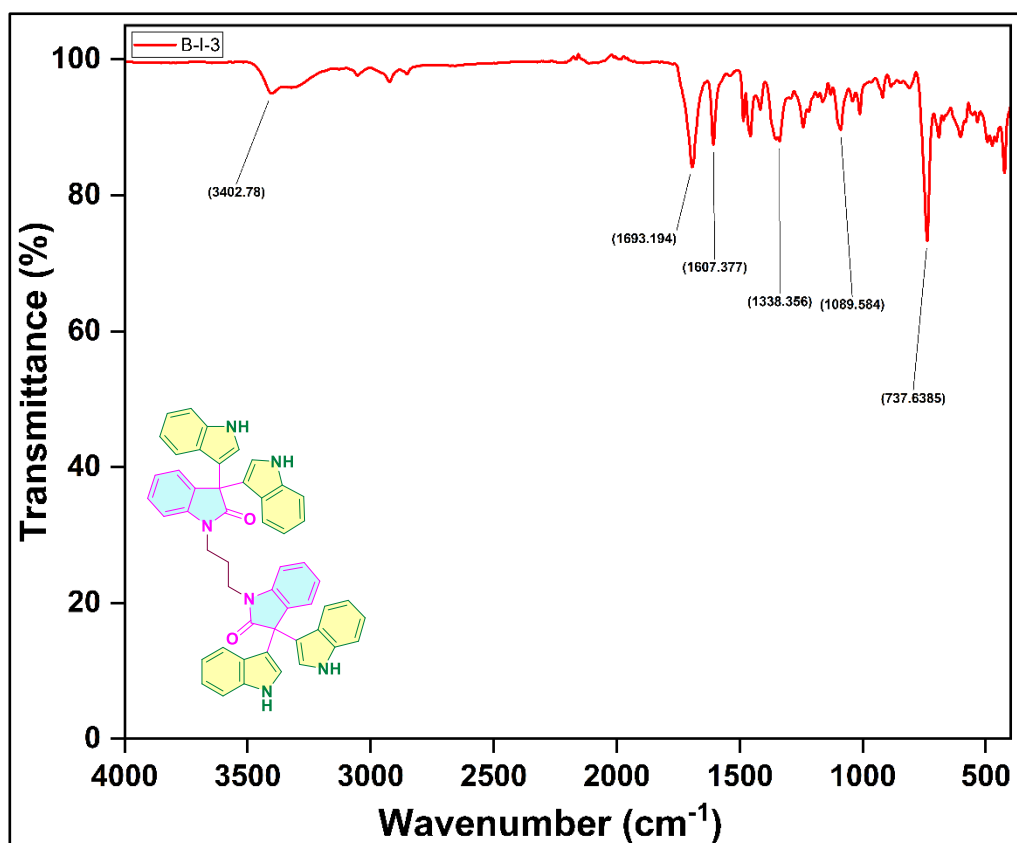

Fig. S105 FT-IR spectrum of 10aa.

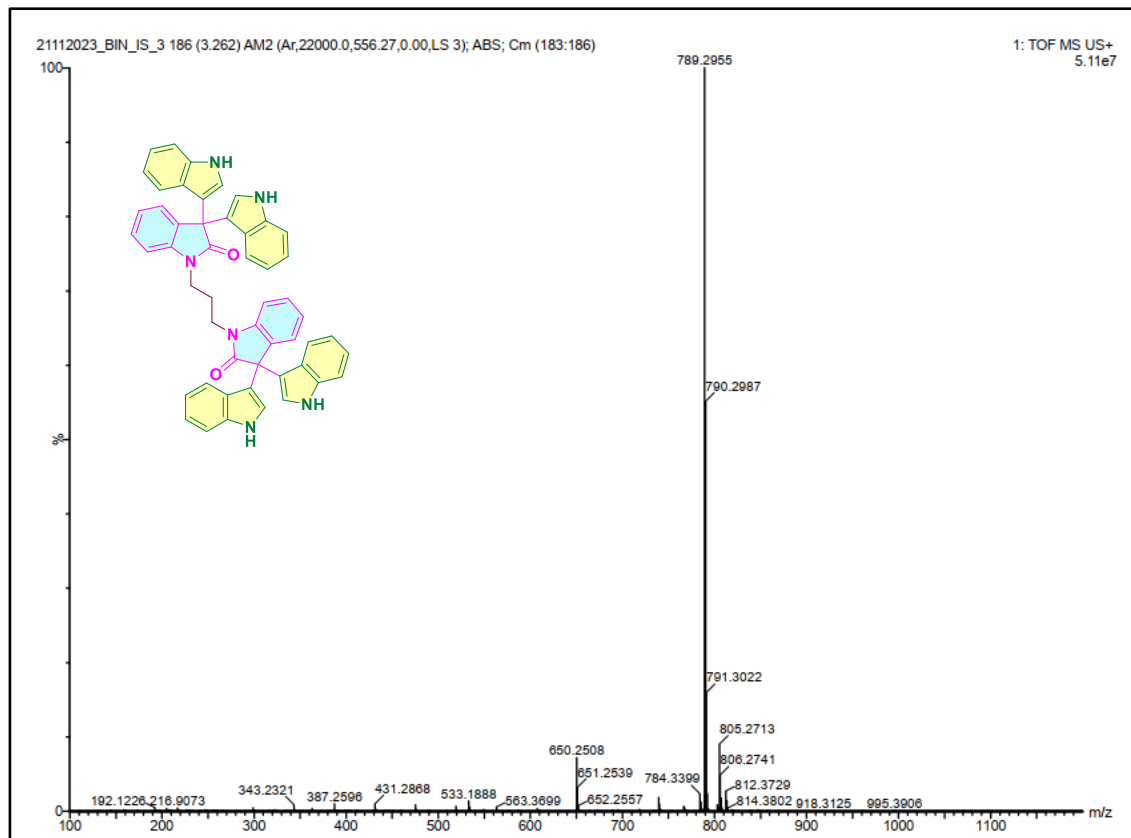

Fig. S106 HR-MS spectrum of 10aa.

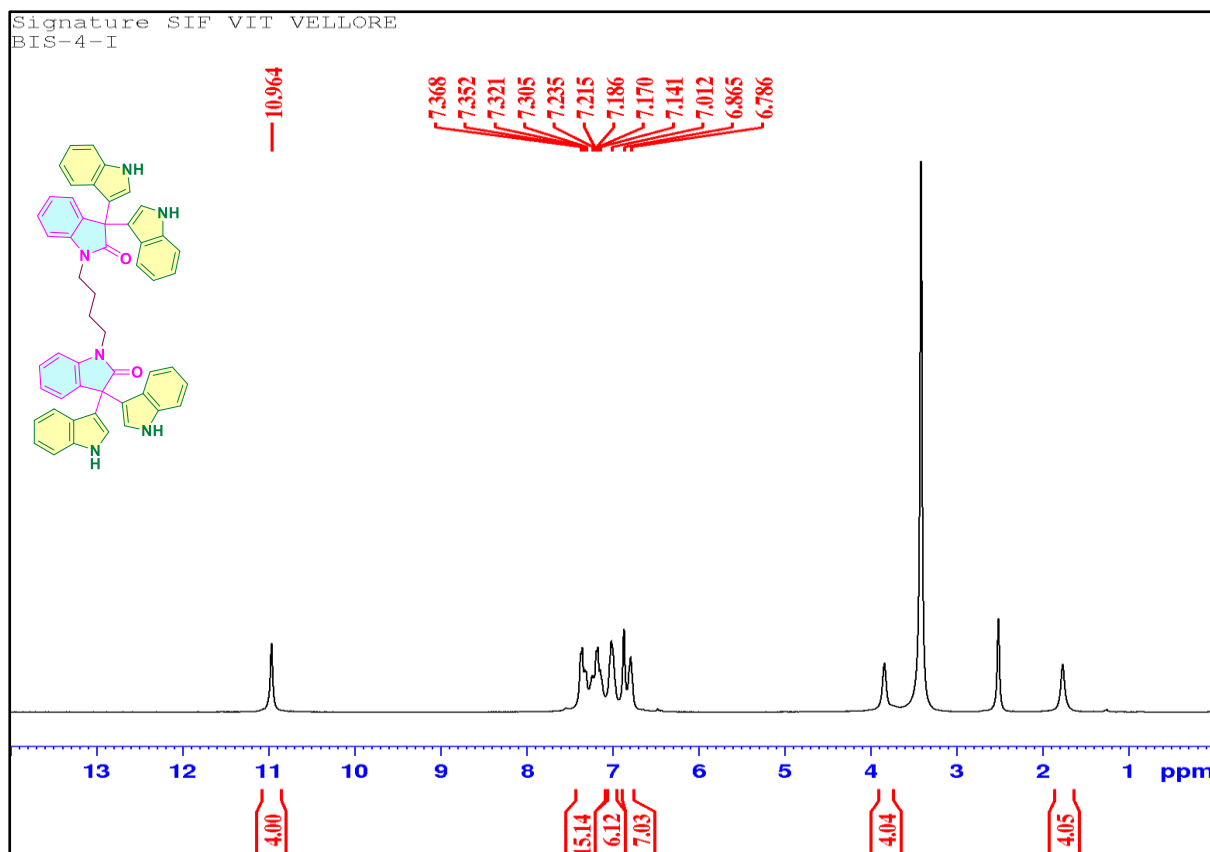

**Fig. S107**  $^1\text{H}$  NMR spectrum (400 MHz) of **10ab** in  $\text{DMSO-d}_6$

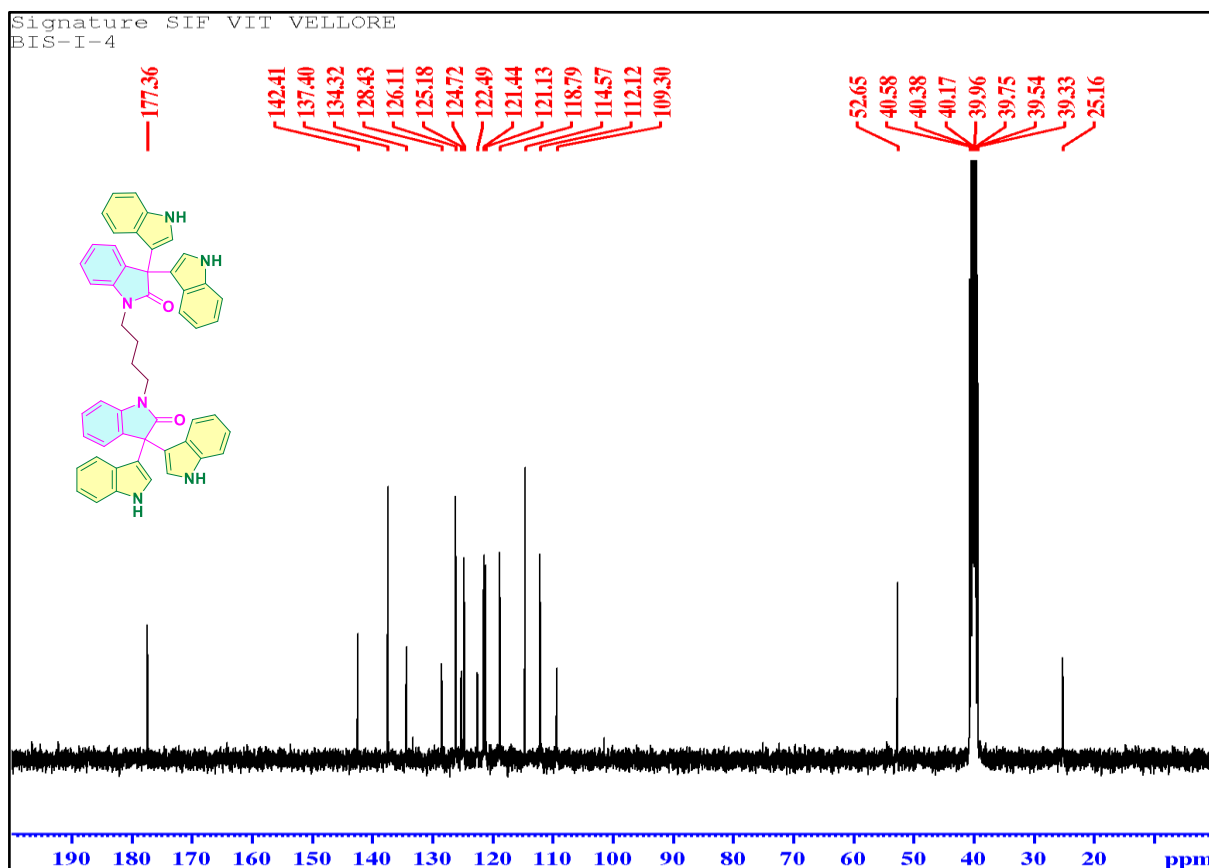

**Fig. S108**  $^{13}\text{C}$  NMR spectrum (100 MHz) of **10ab** in  $\text{DMSO-d}_6$ .

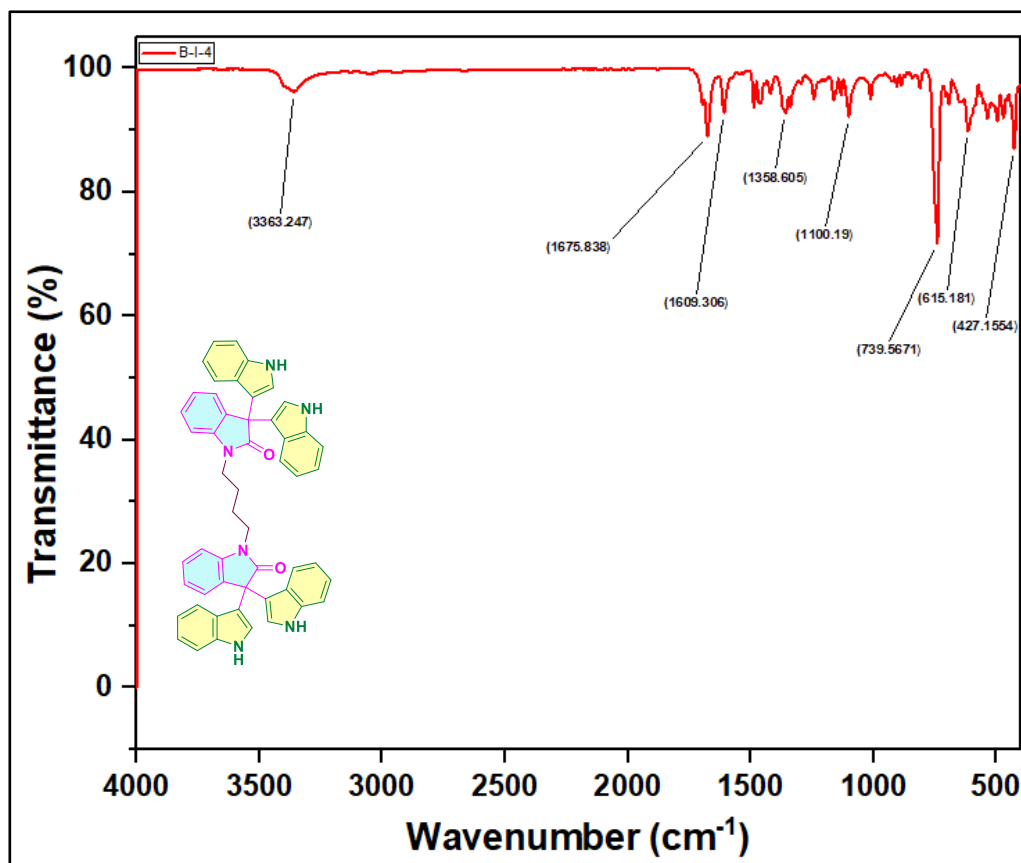

Fig. S109 FT-IR spectrum of 10ab.

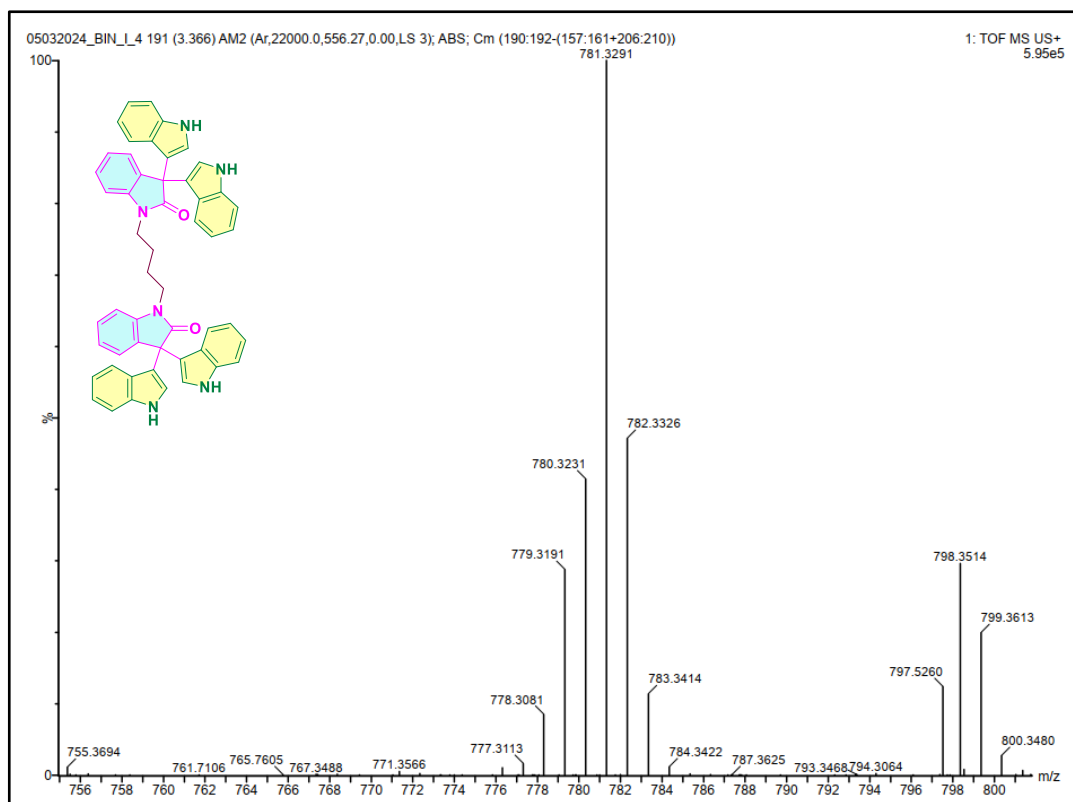

Fig. S110 HR-MS spectrum of 10ab.

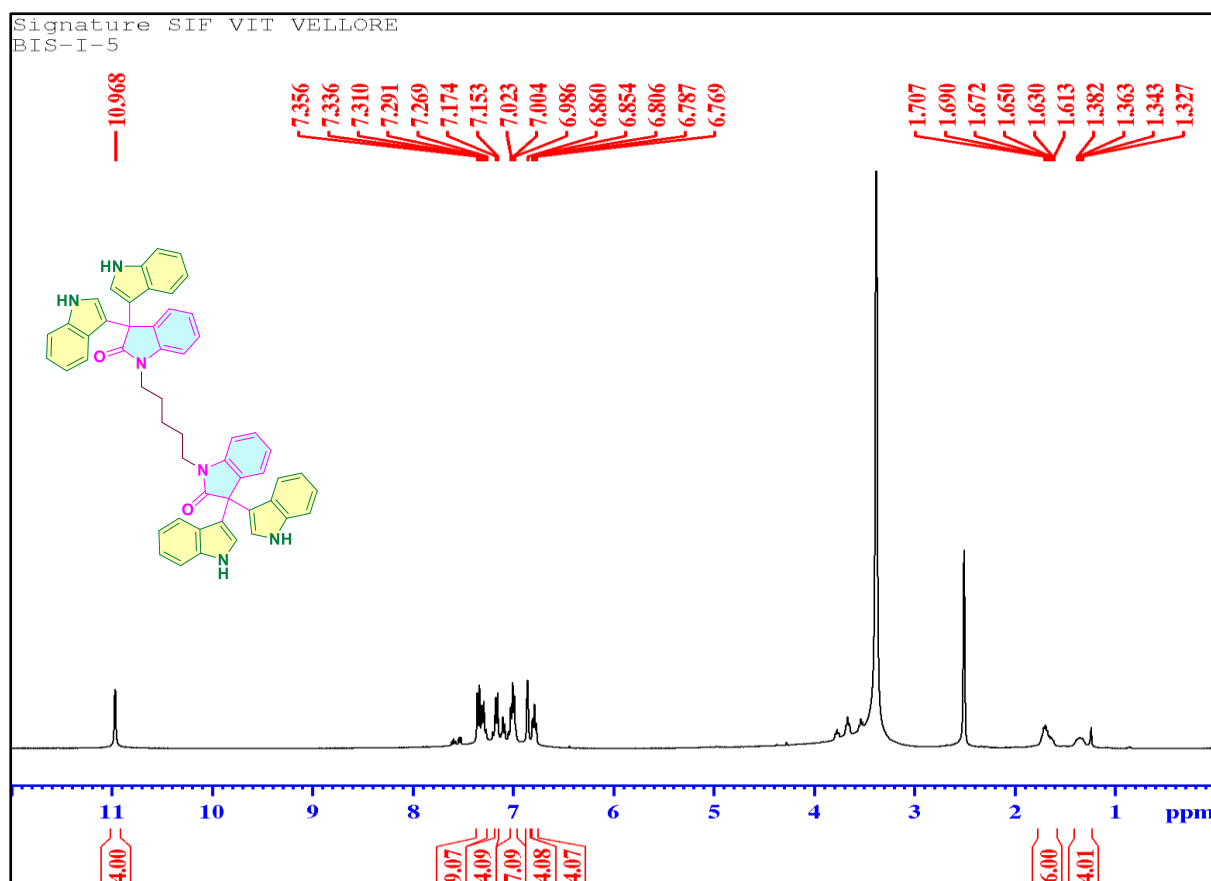

**Fig. S111**  $^1\text{H}$  NMR spectrum (400 MHz) of **10ac** in  $\text{DMSO-d}_6$

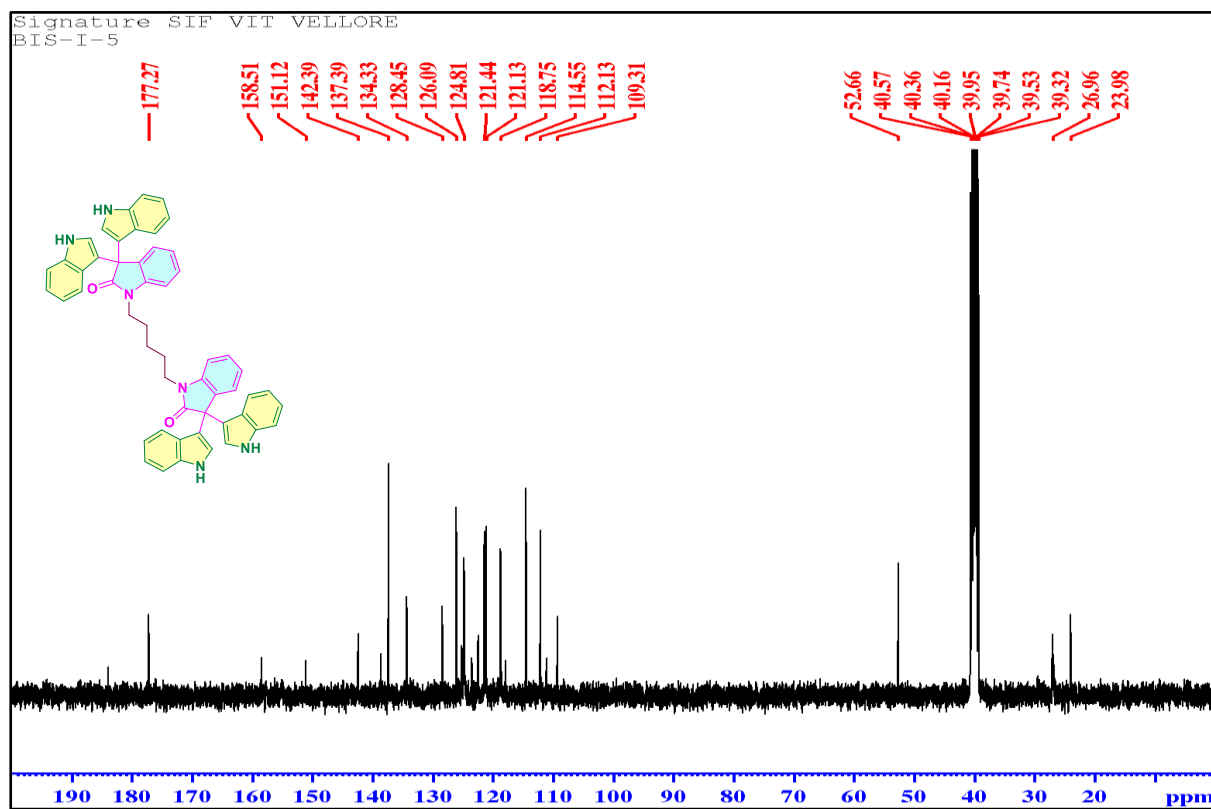

**Fig. S112**  $^{13}\text{C}$  NMR spectrum (100 MHz) of **10ac** in  $\text{DMSO-d}_6$ .

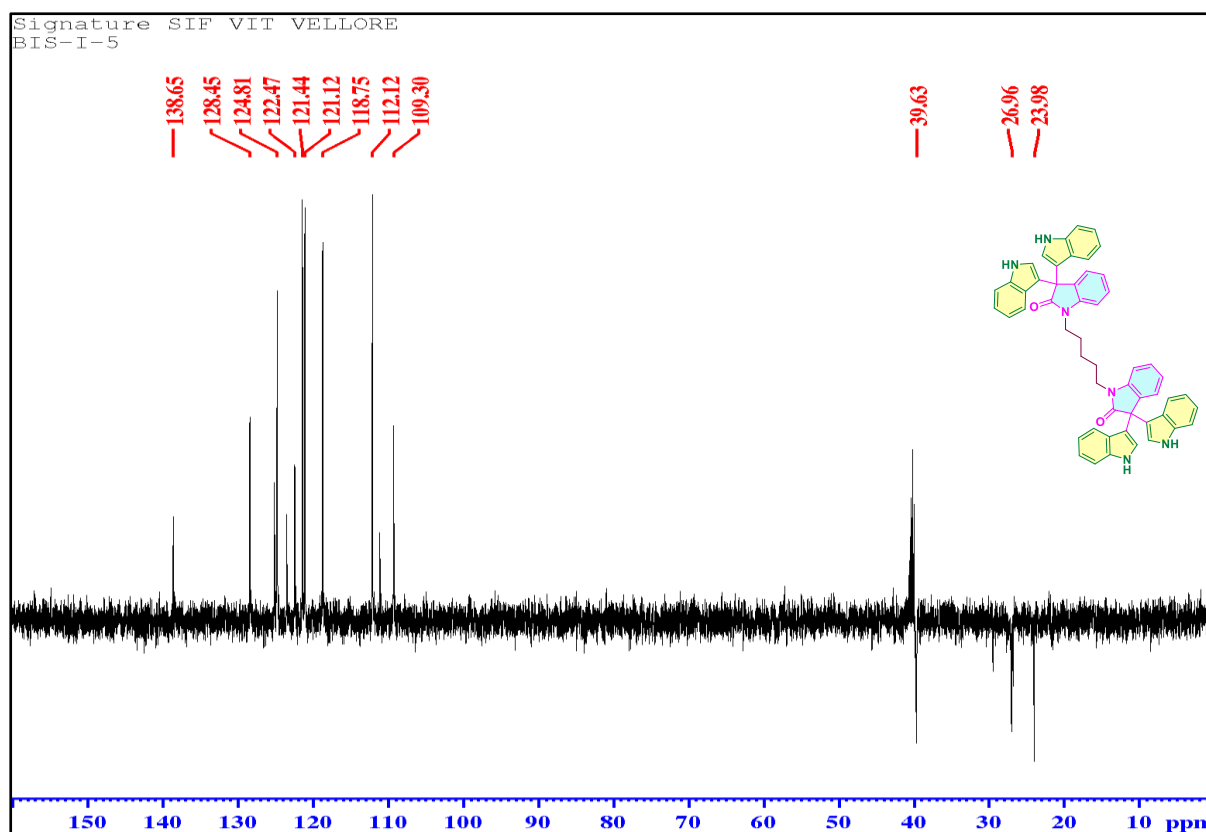

Fig. S113 DEPT-135 NMR spectrum (400 MHz) of **10ac** in DMSO- $d_6$

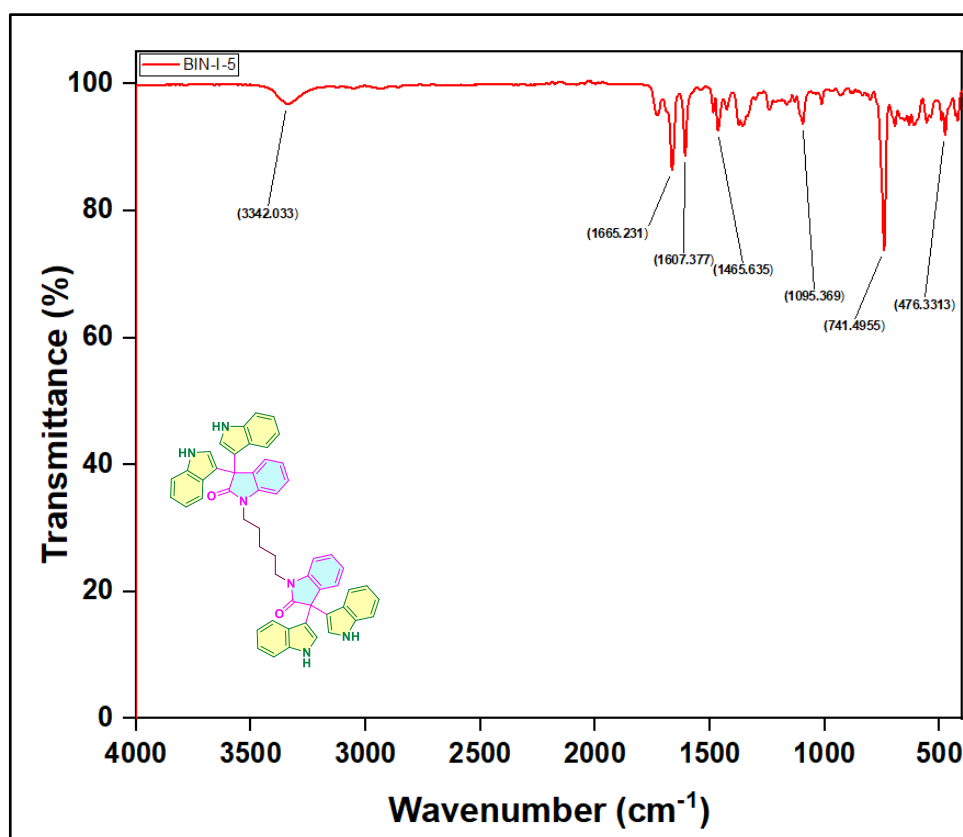

Fig. S114 FT-IR spectrum of **10ac**.

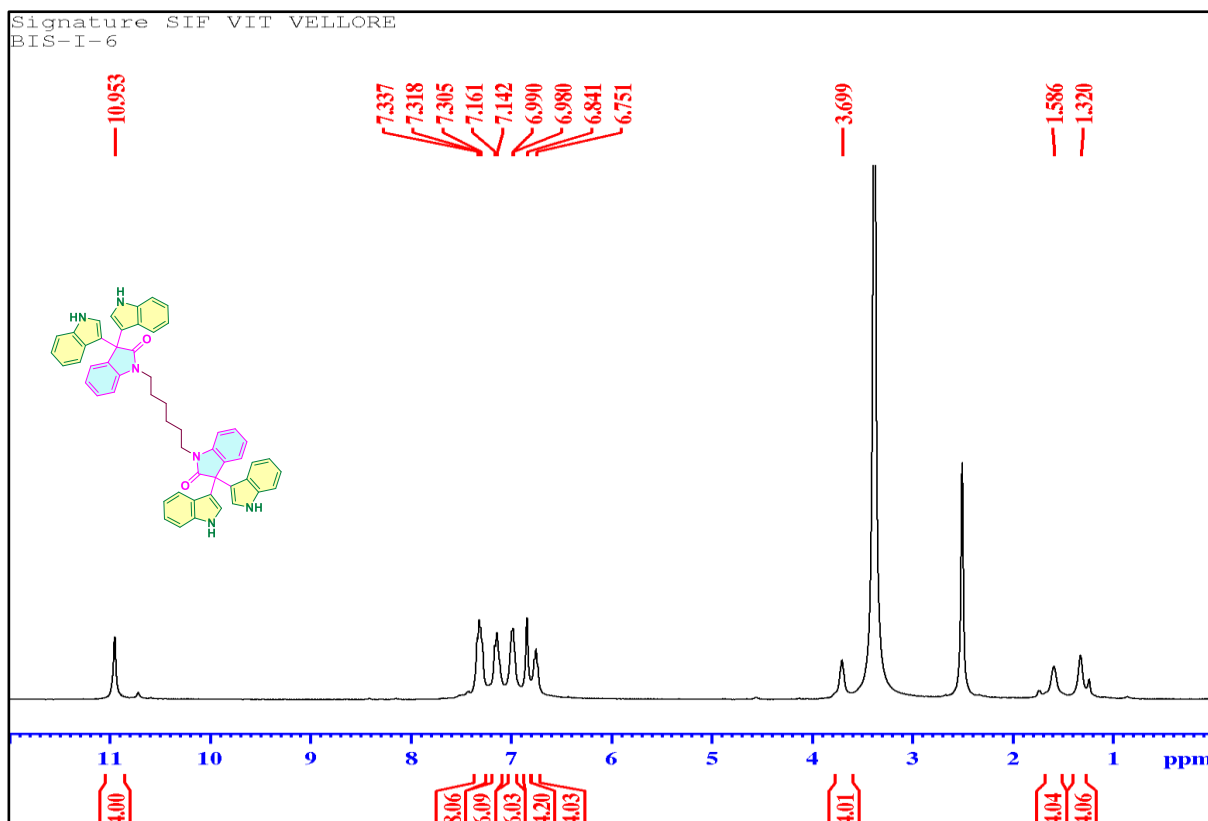

**Fig. S115**  $^1\text{H}$  NMR spectrum (400 MHz) of **10ad** in  $\text{DMSO-d}_6$ .

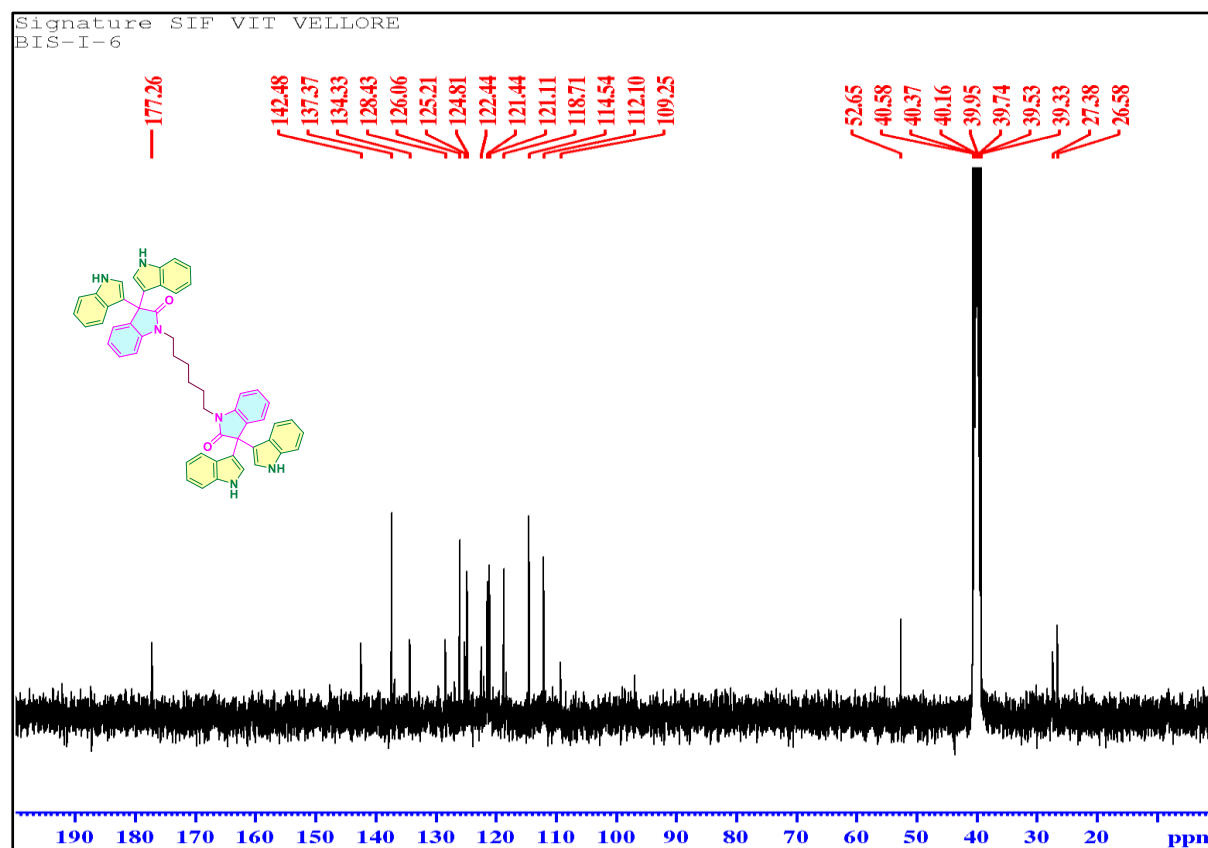

**Fig. S116**  $^{13}\text{C}$  NMR spectrum (100 MHz) of **10ad** in  $\text{DMSO-d}_6$ .

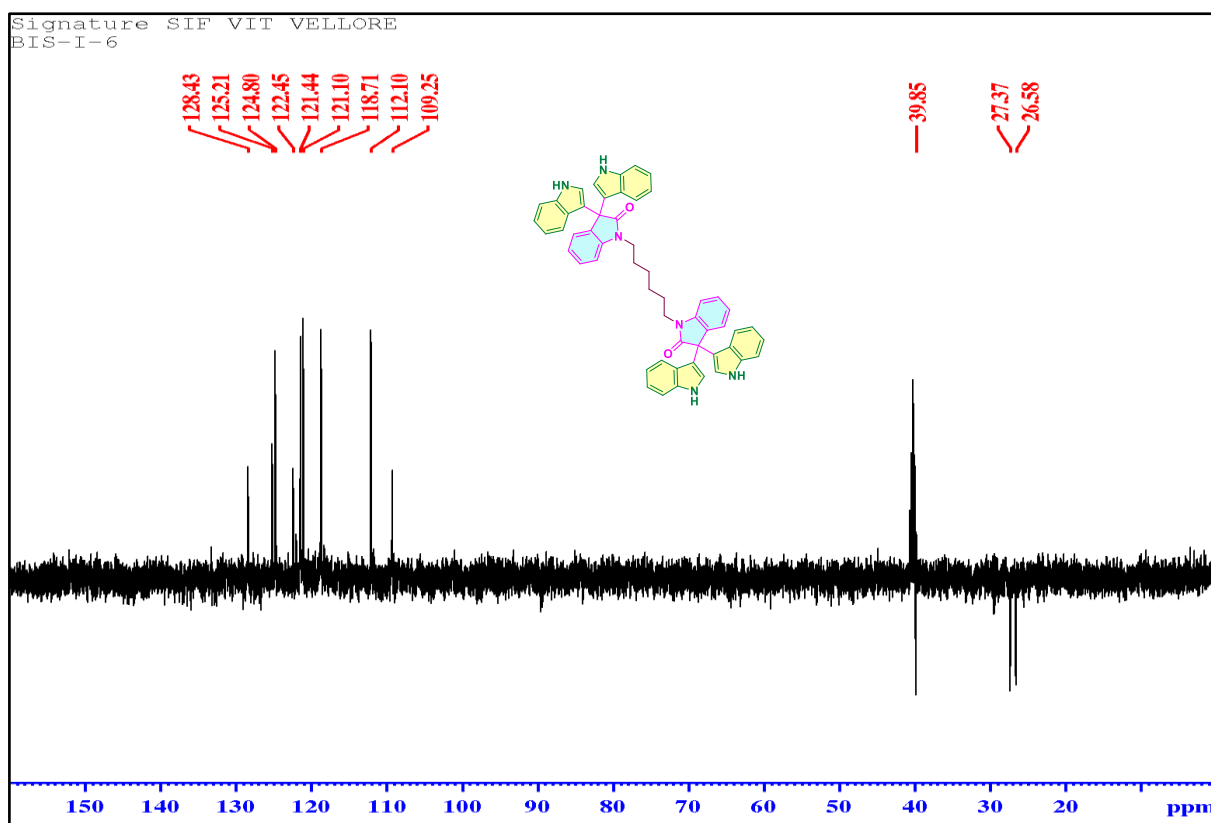

Fig. S117 DEPT-135 NMR spectrum (400 MHz) of **10ad** in DMSO- $d_6$ .

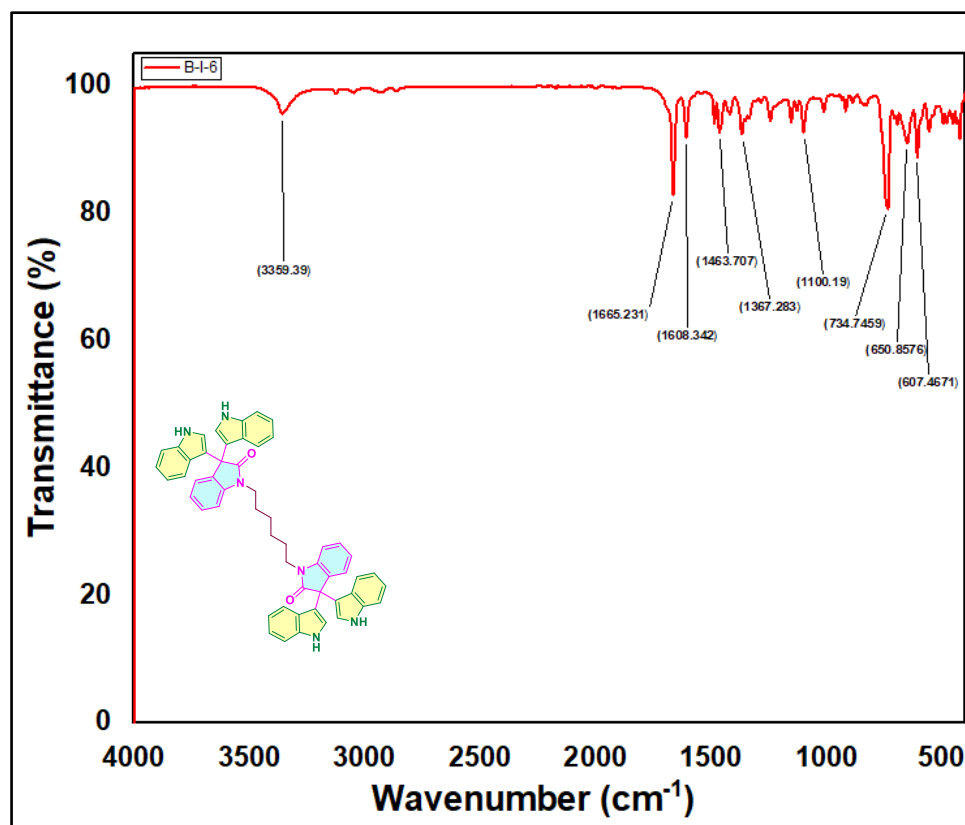

Fig. S118 FT-IR spectrum of **10ad**.

## Crystal Structure Report for 7gj

A specimen of  $\text{C}_{30}\text{H}_{20}\text{Br}_2\text{N}_2\text{O}$ , approximate dimensions 0.190 mm x 0.241 mm x 0.274 mm, was used for the X-ray crystallographic analysis. The X-ray intensity data were measured ( $\lambda = 0.71073 \text{ \AA}$ ). The integration of the data using a triclinic unit cell yielded a total of 55571 reflections to a maximum  $\theta$  angle of  $28.35^\circ$  ( $0.75 \text{ \AA}$  resolution), of which 6063 were independent (average redundancy 9.166, completeness = 99.5%,  $R_{\text{int}} = 5.16\%$ ,  $R_{\text{sig}} = 3.84\%$ ) and 3605 (59.46%) were greater than  $2\sigma(F^2)$ . The final cell constants of  $a = 8.9565(7) \text{ \AA}$ ,  $b = 12.0727(9) \text{ \AA}$ ,  $c = 12.5432(10) \text{ \AA}$ ,  $\alpha = 107.005(3)^\circ$ ,  $\beta = 105.112(3)^\circ$ ,  $\gamma = 97.415(3)^\circ$ , volume =  $1220.78(17) \text{ \AA}^3$ , are based upon the refinement of the XYZ-centroids of reflections above  $20 \sigma(I)$ . The calculated minimum and maximum transmission coefficients (based on crystal size) are 0.4610 and 0.5690. The final anisotropic full-matrix least-squares refinement on  $F^2$  with 318 variables converged at  $R1 = 5.35\%$ , for the observed data and  $wR2 = 15.77\%$  for all data. The goodness-of-fit was 1.029. The largest peak in the final difference electron density synthesis was  $0.695 \text{ e}^-/\text{\AA}^3$  and the largest hole was  $-1.084 \text{ e}^-/\text{\AA}^3$  with an RMS deviation of  $0.083 \text{ e}^-/\text{\AA}^3$ . On the basis of the final model, the calculated density was  $1.590 \text{ g/cm}^3$  and  $F(000)$ , 584  $\text{e}^-$ .

**Table S1a** Sample and crystal data for **7gj**

|                               |                                                           |                             |
|-------------------------------|-----------------------------------------------------------|-----------------------------|
| <b>CCDC No</b>                | <b>2360038</b>                                            |                             |
| <b>Identification code</b>    | <b>7gj</b>                                                |                             |
| <b>Chemical formula</b>       | $\text{C}_{30}\text{H}_{20}\text{Br}_2\text{N}_2\text{O}$ |                             |
| <b>Formula weight</b>         | 584.30 g/mol                                              |                             |
| <b>Temperature</b>            | 300(2) K                                                  |                             |
| <b>Wavelength</b>             | 0.71073 Å                                                 |                             |
| <b>Crystal size</b>           | 0.190 x 0.241 x 0.274 mm                                  |                             |
| <b>Crystal system</b>         | triclinic                                                 |                             |
| <b>Space group</b>            | P -1                                                      |                             |
| <b>Unit cell dimensions</b>   | a = 8.9565(7) Å                                           | $\alpha = 107.005(3)^\circ$ |
|                               | b = 12.0727(9) Å                                          | $\beta = 105.112(3)^\circ$  |
|                               | c = 12.5432(10) Å                                         | $\gamma = 97.415(3)^\circ$  |
| <b>Volume</b>                 | 1220.78(17) Å <sup>3</sup>                                |                             |
| <b>Z</b>                      | 2                                                         |                             |
| <b>Density (calculated)</b>   | 1.590 g/cm <sup>3</sup>                                   |                             |
| <b>Absorption coefficient</b> | 3.347 mm <sup>-1</sup>                                    |                             |
| <b>F(000)</b>                 | 584                                                       |                             |

**Table S1b** Data collection and structure refinement for **7gj**

|                                         |                                                                           |                           |
|-----------------------------------------|---------------------------------------------------------------------------|---------------------------|
| <b>Theta range for data collection</b>  | 1.79 to 28.35°                                                            |                           |
| <b>Index ranges</b>                     | -11≤h≤11, -16≤k≤16, -16≤l≤16                                              |                           |
| <b>Reflections collected</b>            | 55571                                                                     |                           |
| <b>Independent reflections</b>          | 6063 [R(int) = 0.0516]                                                    |                           |
| <b>Max. and min. transmission</b>       | 0.5690 and 0.4610                                                         |                           |
| <b>Refinement method</b>                | Full-matrix least-squares on F <sup>2</sup>                               |                           |
| <b>Refinement program</b>               | SHELXL-2019/1 (Sheldrick, 2019)                                           |                           |
| <b>Function minimized</b>               | $\Sigma w(F_o^2 - F_c^2)^2$                                               |                           |
| <b>Data / restraints / parameters</b>   | 6063 / 0 / 318                                                            |                           |
| <b>Goodness-of-fit on F<sup>2</sup></b> | 1.029                                                                     |                           |
| <b>Final R indices</b>                  | 3605 data; I>2σ(I)                                                        | R1 = 0.0535, wR2 = 0.1355 |
|                                         | all data                                                                  | R1 = 0.1015, wR2 = 0.1577 |
| <b>Weighting scheme</b>                 | $w=1/[\sigma^2(F_o^2)+(0.0645P)^2+1.2110P]$<br>where $P=(F_o^2+2F_c^2)/3$ |                           |
| <b>Largest diff. peak and hole</b>      | 0.695 and -1.084 eÅ <sup>-3</sup>                                         |                           |
| <b>R.M.S. deviation from mean</b>       | 0.083 eÅ <sup>-3</sup>                                                    |                           |

**Table S1c** Atomic coordinates and equivalent isotropic atomic displacement parameters ( $\text{\AA}^2$ ) for **7gj**

U(eq) is defined as one third of the trace of the orthogonalized  $U_{ij}$  tensor.

|     | x/a         | y/b        | z/c        | U(eq)      |
|-----|-------------|------------|------------|------------|
| Br1 | 0.90861(6)  | 0.13612(4) | 0.94322(4) | 0.0835(2)  |
| Br2 | 0.59175(11) | 0.90378(5) | 0.09954(7) | 0.1374(4)  |
| O1  | 0.0938(3)   | 0.5957(2)  | 0.1614(3)  | 0.0636(7)  |
| N1  | 0.1285(3)   | 0.3962(3)  | 0.4613(3)  | 0.0503(7)  |
| N2  | 0.5814(4)   | 0.4431(4)  | 0.1880(3)  | 0.0664(9)  |
| C1  | 0.1233(4)   | 0.3826(3)  | 0.2767(3)  | 0.0430(7)  |
| C2  | 0.0687(4)   | 0.3224(3)  | 0.3460(3)  | 0.0478(8)  |
| C3  | 0.9735(4)   | 0.2091(3)  | 0.2975(4)  | 0.0583(10) |
| C4  | 0.9312(5)   | 0.1549(3)  | 0.1776(4)  | 0.0633(10) |
| C5  | 0.9800(4)   | 0.2143(3)  | 0.1087(3)  | 0.0556(9)  |
| C6  | 0.0748(4)   | 0.3268(3)  | 0.1553(3)  | 0.0486(8)  |
| C7  | 0.2229(4)   | 0.4952(3)  | 0.3573(3)  | 0.0420(7)  |
| C8  | 0.2204(4)   | 0.4988(3)  | 0.4663(3)  | 0.0469(8)  |
| C9  | 0.3106(4)   | 0.5932(3)  | 0.3283(3)  | 0.0408(7)  |
| C10 | 0.1803(4)   | 0.6463(3)  | 0.2607(3)  | 0.0465(8)  |
| C11 | 0.1855(4)   | 0.7650(3)  | 0.3405(3)  | 0.0504(9)  |
| C12 | 0.3154(4)   | 0.7918(3)  | 0.4419(3)  | 0.0458(8)  |
| C13 | 0.3972(4)   | 0.6990(3)  | 0.4394(3)  | 0.0444(8)  |
| C14 | 0.4192(4)   | 0.5497(3)  | 0.2593(3)  | 0.0459(8)  |
| C15 | 0.5004(4)   | 0.6140(3)  | 0.2037(3)  | 0.0503(8)  |
| C16 | 0.6006(4)   | 0.5439(4)  | 0.1604(3)  | 0.0607(11) |
| C17 | 0.4730(4)   | 0.4480(4)  | 0.2483(3)  | 0.0561(9)  |
| C18 | 0.1120(5)   | 0.3640(4)  | 0.5615(4)  | 0.0681(11) |
| C19 | 0.0944(5)   | 0.8472(4)  | 0.3321(4)  | 0.0617(10) |
| C20 | 0.3616(5)   | 0.9000(3)  | 0.5364(4)  | 0.0600(10) |
| C21 | 0.2656(6)   | 0.9824(4)  | 0.5239(5)  | 0.0752(13) |
| C22 | 0.1381(6)   | 0.9554(4)  | 0.4262(5)  | 0.0785(13) |
| C23 | 0.5290(4)   | 0.7160(3)  | 0.5313(3)  | 0.0549(9)  |

|     |           |           |           |            |
|-----|-----------|-----------|-----------|------------|
| C24 | 0.4976(6) | 0.9132(4) | 0.6294(4) | 0.0699(11) |
| C25 | 0.5782(5) | 0.8247(4) | 0.6263(4) | 0.0660(11) |
| C26 | 0.4972(5) | 0.7225(4) | 0.1861(3) | 0.0618(10) |
| C27 | 0.5949(6) | 0.7568(4) | 0.1274(4) | 0.0819(15) |
| C28 | 0.6944(6) | 0.6878(6) | 0.0866(4) | 0.0965(19) |
| C29 | 0.6980(5) | 0.5813(6) | 0.1016(4) | 0.0827(16) |
| C30 | 0.6674(6) | 0.3483(5) | 0.1648(5) | 0.0989(19) |

**Table S1d** Bond lengths (Å) for **7gj**

|         |          |          |          |
|---------|----------|----------|----------|
| Br1-C5  | 1.901(4) | Br2-C27  | 1.908(5) |
| O1-C10  | 1.206(4) | N1-C8    | 1.371(4) |
| N1-C2   | 1.375(5) | N1-C18   | 1.455(4) |
| N2-C16  | 1.362(6) | N2-C17   | 1.375(5) |
| N2-C30  | 1.462(5) | C1-C6    | 1.393(5) |
| C1-C2   | 1.422(5) | C1-C7    | 1.441(5) |
| C2-C3   | 1.383(5) | C3-C4    | 1.376(6) |
| C3-H3   | 0.930000 | C4-C5    | 1.389(6) |
| C4-H4   | 0.930000 | C5-C6    | 1.374(5) |
| C6-H6   | 0.930000 | C7-C8    | 1.362(5) |
| C7-C9   | 1.520(4) | C8-H8    | 0.930000 |
| C9-C14  | 1.509(4) | C9-C13   | 1.522(5) |
| C9-C10  | 1.576(5) | C10-C11  | 1.476(5) |
| C11-C19 | 1.374(5) | C11-C12  | 1.402(5) |
| C12-C20 | 1.408(5) | C12-C13  | 1.413(5) |
| C13-C23 | 1.361(5) | C14-C17  | 1.359(5) |
| C14-C15 | 1.434(5) | C15-C26  | 1.392(6) |
| C15-C16 | 1.414(5) | C16-C29  | 1.391(6) |
| C17-H17 | 0.930000 | C18-H18A | 0.960000 |
| C18-H18 | 0.960000 | C18-H18C | 0.960000 |
| C19-C22 | 1.405(7) | C19-H19  | 0.930000 |
| C20-C24 | 1.403(6) | C20-C21  | 1.413(6) |
| C21-C22 | 1.361(7) | C21-H21  | 0.930000 |
| C22-H22 | 0.930000 | C23-C25  | 1.414(5) |
| C23-H23 | 0.930000 | C24-C25  | 1.361(6) |
| C24-H24 | 0.930000 | C25-H25  | 0.930000 |
| C26-C27 | 1.379(5) | C26-H26  | 0.930000 |
| C27-C28 | 1.389(8) | C28-C29  | 1.357(8) |
| C28-H28 | 0.930000 | C29-H29  | 0.930000 |
| C30-H30 | 0.960000 | C30-H30  | 0.960000 |
| C30-H30 | 0.960000 |          |          |

**Table S1e** Bond angles (°) for **7gj**

|             |            |             |            |
|-------------|------------|-------------|------------|
| C8-N1-C2    | 108.4(3)   | C8-N1-C18   | 126.1(3)   |
| C2-N1-C18   | 125.2(3)   | C16-N2-C17  | 108.4(3)   |
| C16-N2-C30  | 126.5(4)   | C17-N2-C30  | 124.9(4)   |
| C6-C1-C2    | 118.8(3)   | C6-C1-C7    | 134.8(3)   |
| C2-C1-C7    | 106.4(3)   | N1-C2-C3    | 129.9(3)   |
| N1-C2-C1    | 107.9(3)   | C3-C2-C1    | 122.2(4)   |
| C4-C3-C2    | 117.6(4)   | C4-C3-H3    | 121.200000 |
| C2-C3-H3    | 121.200000 | C3-C4-C5    | 120.6(4)   |
| C3-C4-H4    | 119.700000 | C5-C4-H4    | 119.700000 |
| C6-C5-C4    | 122.7(4)   | C6-C5-Br1   | 119.3(3)   |
| C4-C5-Br1   | 118.0(3)   | C5-C6-C1    | 118.0(3)   |
| C5-C6-H6    | 121.000000 | C1-C6-H6    | 121.000000 |
| C8-C7-C1    | 106.4(3)   | C8-C7-C9    | 125.9(3)   |
| C1-C7-C9    | 127.7(3)   | C7-C8-N1    | 111.0(3)   |
| C7-C8-H8    | 124.500000 | N1-C8-H8    | 124.500000 |
| C14-C9-C7   | 112.4(3)   | C14-C9-C13  | 112.3(3)   |
| C7-C9-C13   | 110.5(3)   | C14-C9-C10  | 112.6(3)   |
| C7-C9-C10   | 106.7(2)   | C13-C9-C10  | 101.8(3)   |
| O1-C10-C11  | 127.9(3)   | O1-C10-C9   | 124.4(3)   |
| C11-C10-C9  | 107.8(3)   | C19-C11-C12 | 119.0(4)   |
| C19-C11-C10 | 133.4(4)   | C12-C11-C10 | 107.6(3)   |
| C11-C12-C20 | 124.0(3)   | C11-C12-C13 | 113.0(3)   |
| C20-C12-C13 | 123.0(3)   | C23-C13-C12 | 118.6(3)   |
| C23-C13-C9  | 132.3(3)   | C12-C13-C9  | 109.2(3)   |
| C17-C14-C15 | 106.3(3)   | C17-C14-C9  | 126.9(3)   |
| C15-C14-C9  | 126.5(3)   | C26-C15-C16 | 119.5(4)   |
| C26-C15-C1  | 133.9(3)   | C16-C15-C14 | 106.6(4)   |
| N2-C16-C29  | 130.4(4)   | N2-C16-C15  | 108.0(3)   |
| C29-C16-C15 | 121.6(5)   | C14-C17-N2  | 110.6(4)   |
| C14-C17-H17 | 124.700000 | N2-C17-H17  | 124.700000 |
| N1-C18-H18  | 109.500000 | N1-C18-H18  | 109.500000 |
| H18-C18-H18 | 109.500000 | N1-C18-H18  | 109.500000 |

|                        |                        |
|------------------------|------------------------|
| H18-C18-H18 109.500000 | H18-C18-H18 109.500000 |
| C11-C19-C22 117.8(4)   | C11-C19-H19 121.100000 |
| C22-C19-H19 121.100000 | C24-C20-C12 116.4(3)   |
| C24-C20-C21 128.4(4)   | C12-C20-C21 115.2(4)   |
| C22-C21-C20 120.7(4)   | C22-C21-H21 119.700000 |
| C20-C21-H21 119.700000 | C21-C22-C19 123.4(4)   |
| C21-C22-H22 118.300000 | C19-C22-H22 118.300000 |
| C13-C23-C25 119.2(4)   | C13-C23-H23 120.400000 |
| C25-C23-H23 120.400000 | C25-C24-C20 120.7(4)   |
| C25-C24-H24 119.600000 | C20-C24-H24 119.700000 |
| C24-C25-C23 122.2(4)   | C24-C25-H25 118.900000 |
| C23-C25-H25 118.900000 | C27-C26-C15 117.5(4)   |
| C27-C26-H26 121.200000 | C15-C26-H26 121.200000 |
| C26-C27-C28 122.5(5)   | C26-C27-Br2 118.8(4)   |
| C28-C27-Br2 118.7(4)   | C29-C28-C27 120.9(4)   |
| C29-C28-H28 119.500000 | C27-C28-H28 119.500000 |
| C28-C29-C1 118.0(5)    | C28-C29-H29 121.000000 |
| C16-C29-H2 121.000000  | N2-C30-H30A 109.500000 |
| N2-C30-H30 109.500000  | H30-C30-H30 109.500000 |
| N2-C30-H30 109.500000  | H30-C30-H30 109.500000 |
| H30-C30-H30 109.500000 |                        |

**Table S1f** Torsion angles (°) for **7gj**

|                 |           |                 |           |
|-----------------|-----------|-----------------|-----------|
| C8-N1-C2-C3     | 178.4(3)  | C18-N1-C2-C3    | 5.2(6)    |
| C8-N1-C2-C1     | -1.1(4)   | C18-N1-C2-C1    | -174.3(3) |
| C6-C1-C2-N1     | -178.3(3) | C7-C1-C2-N1     | 1.6(4)    |
| C6-C1-C2-C3     | 2.2(5)    | C7-C1-C2-C3     | -177.9(3) |
| N1-C2-C3-C4     | -179.8(3) | C1-C2-C3-C4     | -0.4(5)   |
| C2-C3-C4-C5     | -1.5(6)   | C3-C4-C5-C6     | 1.7(6)    |
| C3-C4-C5-Br1    | -177.2(3) | C4-C5-C6-C1     | 0.1(5)    |
| Br1-C5-C6-C1    | 179.0(2)  | C2-C1-C6-C5     | -2.0(5)   |
| C7-C1-C6-C5     | 178.1(3)  | C6-C1-C7-C8     | 178.4(4)  |
| C2-C1-C7-C8     | -1.5(3)   | C6-C1-C7-C9     | 0.0(6)    |
| C2-C1-C7-C9     | -179.9(3) | C1-C7-C8-N1     | 0.9(4)    |
| C9-C7-C8-N1     | 179.3(3)  | C2-N1-C8-C7     | 0.1(4)    |
| C18-N1-C8-C7    | 173.2(3)  | C8-C7-C9-C14    | 126.1(3)  |
| C1-C7-C9-C14    | -55.8(4)  | C8-C7-C9-C13    | -0.2(4)   |
| C1-C7-C9-C13    | 177.9(3)  | C8-C7-C9-C10    | -110.0(4) |
| C1-C7-C9-C10    | 68.1(4)   | C14-C9-C10-O1   | 51.7(4)   |
| C7-C9-C10-O1    | -72.0(4)  | C13-C9-C10-O1   | 172.2(3)  |
| C14-C9-C10-C11  | -128.4(3) | C7-C9-C10-C11   | 107.8(3)  |
| C13-C9-C10-C11  | -8.0(3)   | O1-C10-C11-C19  | 4.9(6)    |
| C9-C10-C11-C19  | -174.9(4) | O1-C10-C11-C12  | -173.9(3) |
| C9-C10-C11-C12  | 6.2(3)    | C19-C11-C12-C20 | -1.4(5)   |
| C10-C11-C12-C20 | 177.7(3)  | C19-C11-C12-C13 | 179.2(3)  |
| C10-C11-C12-C13 | -1.7(4)   | C11-C12-C13-C23 | 177.7(3)  |
| C20-C12-C13-C23 | -1.7(5)   | C11-C12-C13-C9  | -3.7(4)   |
| C20-C12-C13-C9  | 176.9(3)  | C14-C9-C13-C23  | -54.1(5)  |
| C7-C9-C13-C23   | 72.3(4)   | C10-C9-C13-C23  | -174.7(4) |
| C14-C9-C13-C12  | 127.7(3)  | C7-C9-C13-C12   | -106.0(3) |
| C10-C9-C13-C12  | 7.0(3)    | C7-C9-C14-C17   | -17.5(5)  |
| C13-C9-C14-C17  | 107.8(4)  | C10-C9-C14-C17  | -138.0(4) |
| C7-C9-C14-C15   | 170.2(3)  | C13-C9-C14-C15  | -64.5(4)  |
| C10-C9-C14-C15  | 49.7(4)   | C17-C14-C15-C26 | -179.9(4) |
| C9-C14-C15-C26  | -6.3(6)   | C17-C14-C15-C16 | 0.4(4)    |

|                 |           |                 |           |
|-----------------|-----------|-----------------|-----------|
| C9-C14-C15-C16  | 174.0(3)  | C17-N2-C16-C29  | 179.0(4)  |
| C30-N2-C16-C29  | 2.5(7)    | C17-N2-C16-C15  | -0.5(4)   |
| C30-N2-C16-C15  | -177.0(4) | C26-C15-C16-N2  | -179.7(3) |
| C14-C15-C16-N2  | 0.0(4)    | C26-C15-C16-C29 | 0.8(5)    |
| C14-C15-C16-C29 | -179.5(3) | C15-C14-C17-N2  | -0.8(4)   |
| C9-C14-C17-N2   | -174.3(3) | C16-N2-C17-C14  | 0.8(4)    |
| C30-N2-C17-C14  | 177.4(4)  | C12-C11-C19-C22 | 0.7(5)    |
| C10-C11-C19-C22 | -178.0(4) | C11-C12-C20-C24 | -178.0(3) |
| C13-C12-C20-C24 | 1.3(5)    | C11-C12-C20-C21 | 0.8(5)    |
| C13-C12-C20-C21 | -179.9(3) | C24-C20-C21-C22 | 179.0(4)  |
| C12-C20-C21-C22 | 0.3(6)    | C20-C21-C22-C19 | -0.9(7)   |
| C11-C19-C22-C21 | 0.3(7)    | C12-C13-C23-C25 | 0.8(5)    |
| C9-C13-C23-C25  | -177.3(3) | C12-C20-C24-C25 | -0.1(6)   |
| C21-C20-C24-C25 | -178.8(4) | C20-C24-C25-C23 | -0.7(7)   |
| C13-C23-C25-C24 | 0.3(6)    | C16-C1-C26-C27  | -0.6(5)   |
| C14-C15-C26-C27 | 179.8(4)  | C15-C26-C27-C28 | -0.2(6)   |
| C15-C26-C27-Br2 | 179.1(3)  | C26-C27-C28-C29 | 1.0(7)    |
| Br2-C27-C28-C29 | -178.4(4) | C27-C28-C29-C16 | -0.8(7)   |
| N2-C16-C29-C28  | -179.5(4) | C15-C16-C29-C28 | -0.1(6)   |

**Table S1g** Anisotropic atomic displacement parameters ( $\text{\AA}^2$ ) for **7gj**

The anisotropic atomic displacement factor exponent takes the form:  $-2\pi^2 [h^2 a^{*2} U_{11} + \dots + 2 h k a^* b^* U_{12}]$

|     | U11        | U22        | U33        | U23        | U13        | U12        |
|-----|------------|------------|------------|------------|------------|------------|
| Br1 | 0.0895(4)  | 0.0714(3)  | 0.0699(3)  | 0.0049(2)  | 0.0237(3)  | -0.0010(2) |
| Br2 | 0.2022(8)  | 0.0786(4)  | 0.1319(6)  | 0.0224(4)  | 0.1031(6)  | -0.0398(4) |
| O1  | 0.0586(16) | 0.0683(17) | 0.0631(18) | 0.0296(14) | 0.0094(14) | 0.0148(13) |
| N1  | 0.0447(16) | 0.0634(18) | 0.0564(18) | 0.0345(15) | 0.0212(14) | 0.0145(14) |
| N2  | 0.0491(18) | 0.094(3)   | 0.058(2)   | 0.0164(19) | 0.0206(16) | 0.0378(18) |
| C1  | 0.0407(17) | 0.0462(17) | 0.055(2)   | 0.0261(16) | 0.0221(15) | 0.0160(14) |
| C2  | 0.0381(17) | 0.054(2)   | 0.064(2)   | 0.0315(18) | 0.0214(16) | 0.0164(15) |
| C3  | 0.050(2)   | 0.057(2)   | 0.082(3)   | 0.040(2)   | 0.024(2)   | 0.0115(17) |
| C4  | 0.055(2)   | 0.046(2)   | 0.087(3)   | 0.024(2)   | 0.021(2)   | 0.0050(17) |
| C5  | 0.054(2)   | 0.049(2)   | 0.064(2)   | 0.0162(18) | 0.0218(18) | 0.0123(17) |
| C6  | 0.0478(19) | 0.0456(18) | 0.060(2)   | 0.0208(16) | 0.0252(17) | 0.0135(15) |
| C7  | 0.0375(16) | 0.0466(17) | 0.0520(19) | 0.0227(15) | 0.0208(15) | 0.0163(14) |
| C8  | 0.0398(18) | 0.055(2)   | 0.054(2)   | 0.0241(16) | 0.0191(15) | 0.0147(15) |
| C9  | 0.0375(16) | 0.0454(17) | 0.0490(18) | 0.0212(15) | 0.0214(14) | 0.0130(13) |
| C10 | 0.0413(18) | 0.0531(19) | 0.057(2)   | 0.0279(17) | 0.0240(17) | 0.0107(15) |
| C11 | 0.050(2)   | 0.058(2)   | 0.065(2)   | 0.0344(18) | 0.0333(18) | 0.0202(17) |
| C12 | 0.0465(19) | 0.0475(18) | 0.056(2)   | 0.0238(16) | 0.0284(17) | 0.0148(15) |
| C13 | 0.0456(19) | 0.0459(18) | 0.0518(19) | 0.0207(15) | 0.0259(16) | 0.0132(15) |
| C14 | 0.0365(17) | 0.056(2)   | 0.0481(19) | 0.0164(16) | 0.0176(15) | 0.0128(15) |
| C15 | 0.0326(16) | 0.069(2)   | 0.0411(18) | 0.0110(16) | 0.0131(14) | 0.0004(15) |
| C16 | 0.0340(18) | 0.095(3)   | 0.0422(19) | 0.008(2)   | 0.0140(15) | 0.0094(19) |
| C17 | 0.045(2)   | 0.071(2)   | 0.057(2)   | 0.0213(19) | 0.0180(17) | 0.0244(18) |
| C18 | 0.064(3)   | 0.095(3)   | 0.068(3)   | 0.052(2)   | 0.030(2)   | 0.018(2)   |
| C19 | 0.065(2)   | 0.071(3)   | 0.078(3)   | 0.046(2)   | 0.038(2)   | 0.034(2)   |
| C20 | 0.069(3)   | 0.052(2)   | 0.069(3)   | 0.0199(19) | 0.036(2)   | 0.0181(19) |
| C21 | 0.097(4)   | 0.054(2)   | 0.088(3)   | 0.022(2)   | 0.046(3)   | 0.031(2)   |
| C22 | 0.096(4)   | 0.069(3)   | 0.102(4)   | 0.042(3)   | 0.052(3)   | 0.048(3)   |
| C23 | 0.046(2)   | 0.059(2)   | 0.062(2)   | 0.0195(18) | 0.0203(18) | 0.0149(17) |
| C24 | 0.079(3)   | 0.055(2)   | 0.065(3)   | 0.0059(19) | 0.026(2)   | 0.007(2)   |

|     |          |          |          |            |            |             |
|-----|----------|----------|----------|------------|------------|-------------|
| C25 | 0.060(2) | 0.065(3) | 0.061(2) | 0.013(2)   | 0.014(2)   | 0.005(2)    |
| C26 | 0.063(2) | 0.060(2) | 0.054(2) | 0.0081(18) | 0.0288(19) | -0.0107(18) |
| C27 | 0.080(3) | 0.083(3) | 0.063(3) | 0.003(2)   | 0.038(2)   | -0.029(2)   |
| C28 | 0.066(3) | 0.131(5) | 0.063(3) | 0.000(3)   | 0.037(2)   | -0.038(3)   |
| C29 | 0.044(2) | 0.127(5) | 0.055(3) | 0.000(3)   | 0.0245(19) | 0.000(3)    |
| C30 | 0.074(3) | 0.131(5) | 0.086(3) | 0.009(3)   | 0.027(3)   | 0.064(3)    |

**Table S1h** Hydrogen atomic coordinates and isotropic atomic displacement parameters ( $\text{\AA}^2$ ) for **7gj**

|     | x/a     | y/b    | z/c    | U(eq)    |
|-----|---------|--------|--------|----------|
| H3  | -0.0606 | 0.1708 | 0.3441 | 0.070000 |
| H4  | -0.1307 | 0.0780 | 0.1425 | 0.076000 |
| H6  | 0.1057  | 0.3646 | 0.1072 | 0.058000 |
| H8  | 0.2739  | 0.5624 | 0.5350 | 0.056000 |
| H17 | 0.4409  | 0.3897 | 0.2776 | 0.067000 |
| H18 | 0.1182  | 0.4343 | 0.6246 | 0.102000 |
| H18 | 0.1957  | 0.3260 | 0.5867 | 0.102000 |
| H18 | 0.0113  | 0.3105 | 0.5392 | 0.102000 |
| H19 | 0.0068  | 0.8318 | 0.2665 | 0.074000 |
| H21 | 0.2898  | 1.0559 | 0.5829 | 0.090000 |
| H22 | 0.0767  | 1.0113 | 0.4214 | 0.094000 |
| H23 | 0.5860  | 0.6569 | 0.5315 | 0.066000 |
| H24 | 0.5331  | 0.9832 | 0.6938 | 0.084000 |
| H25 | 0.6686  | 0.8362 | 0.6887 | 0.079000 |
| H26 | 0.4317  | 0.7700 | 0.2131 | 0.074000 |
| H28 | 0.7594  | 0.7151 | 0.0484 | 0.116000 |
| H29 | 0.7637  | 0.5346 | 0.0735 | 0.099000 |
| H30 | 0.6163  | 0.2805 | 0.1776 | 0.148000 |
| H30 | 0.7746  | 0.3757 | 0.2167 | 0.148000 |
| H30 | 0.6677  | 0.3263 | 0.0849 | 0.148000 |

**Table S1i** Hydrogen bond distances ( $\text{\AA}$ ) and angles ( $^\circ$ ) for **7gj**

|             | Donor-H | Acceptor-H | Donor-Acceptor | Angle |
|-------------|---------|------------|----------------|-------|
| C4-H4...Br2 | 0.93    | 2.86       | 3.705(4)       | 151.6 |

Symmetry transformations used to generate equivalent atoms: x-1, y-1, z

**Table S2** Interactions of Hirshfeld Surface in percentages for **7gj**

| S. No | Inside atom | Outside atom | Percentage | S. No | Inside atom | Outside atom | Percentage |
|-------|-------------|--------------|------------|-------|-------------|--------------|------------|
| 1     | All         | All          | 100        | 37    | All         | All          | 100        |
| 2     | All         | Br           | 10.3       | 38    | Br          | All          | 16.0       |
| 3     | All         | O            | 2.9        | 39    | O           | All          | 3.3        |
| 4     | All         | N            | 1.3        | 40    | N           | All          | 1.4        |
| 5     | All         | C            | 16.3       | 41    | C           | All          | 19.3       |
| 6     | All         | H            | 69.1       | 42    | H           | All          | 59.9       |
| 7     | Br          | All          | 16.0       | 43    | All         | Br           | 10.3       |
| 8     | Br          | Br           | 1.6        | 44    | Br          | Br           | 1.6        |
| 9     | Br          | O            | 0.4        | 45    | O           | Br           | 0.3        |
| 10    | Br          | N            | 0.0        | 46    | N           | Br           | 0.0        |
| 11    | Br          | C            | 0.4        | 47    | C           | Br           | 0.3        |
| 12    | Br          | H            | 13.7       | 48    | H           | Br           | 8.1        |
| 13    | O           | All          | 3.3        | 49    | All         | O            | 2.9        |
| 14    | O           | Br           | 0.3        | 50    | Br          | O            | 0.4        |
| 15    | O           | O            | 0.2        | 51    | O           | O            | 0.2        |
| 16    | O           | N            | 0.0        | 52    | N           | O            | 0.0        |
| 17    | O           | C            | 0.0        | 53    | C           | O            | 0.0        |
| 18    | O           | H            | 0.0        | 54    | H           | O            | 2.4        |
| 19    | N           | All          | 1.4        | 55    | All         | N            | 1.3        |
| 20    | N           | Br           | 0.0        | 56    | Br          | N            | 0.0        |
| 21    | N           | O            | 0.0        | 57    | O           | N            | 0.0        |
| 22    | N           | N            | 0.1        | 58    | N           | N            | 0.1        |
| 23    | N           | C            | 0.3        | 59    | C           | N            | 0.3        |
| 24    | N           | H            | 1.0        | 60    | H           | N            | 1.0        |
| 25    | C           | All          | 19.3       | 61    | All         | C            | 16.3       |
| 26    | C           | Br           | 0.3        | 62    | Br          | C            | 0.4        |
| 27    | C           | O            | 0.0        | 63    | O           | C            | 0.0        |
| 28    | C           | N            | 0.3        | 64    | N           | C            | 0.3        |
| 29    | C           | C            | 2.3        | 65    | C           | C            | 2.3        |

|    |   |     |      |    |     |   |      |
|----|---|-----|------|----|-----|---|------|
| 30 | C | H   | 16.4 | 66 | H   | C | 13.4 |
| 31 | H | All | 59.9 | 67 | All | H | 69.1 |
| 32 | H | Br  | 8.1  | 68 | Br  | H | 13.7 |
| 33 | H | O   | 2.4  | 69 | O   | H | 2.8  |
| 34 | H | N   | 1.0  | 70 | N   | H | 1.0  |
| 35 | H | C   | 13.4 | 71 | C   | H | 16.4 |
| 36 | H | H   | 35.1 | 72 | H   | H | 35.1 |

**Table S3** The charge densities in HOMO, LUMO and electrostatic potential energy surface of the synthesized derivatives **7** and **10**

|            | HOMO                                                                                           | LUMO                                                                                           | Band gap (eV) | ESP                                                                                   |
|------------|------------------------------------------------------------------------------------------------|------------------------------------------------------------------------------------------------|---------------|---------------------------------------------------------------------------------------|
| <b>7aa</b> | 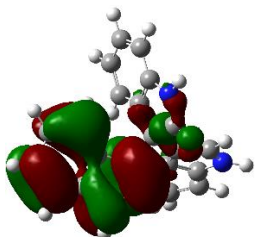<br>-5.2425   | 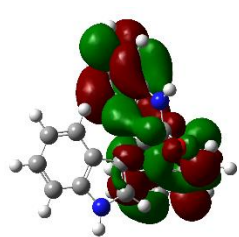<br>-0.2519   | 4.9906        | 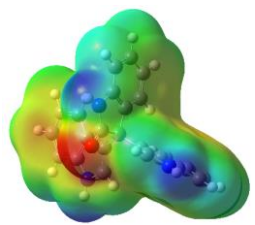   |
| <b>7ab</b> | 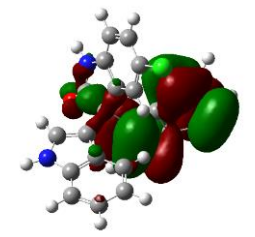<br>-5.3514   | 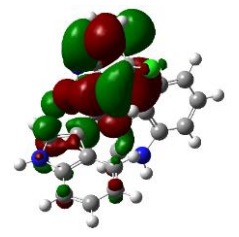<br>-0.5418   | 4.8096        | 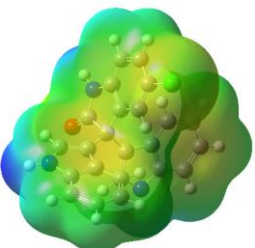   |
| <b>7ac</b> | 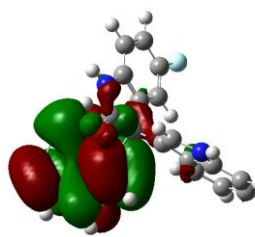<br>-5.3163 | 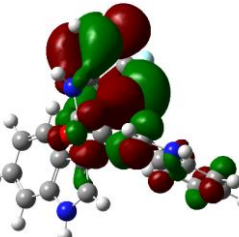<br>0.4612  | 4.8551        | 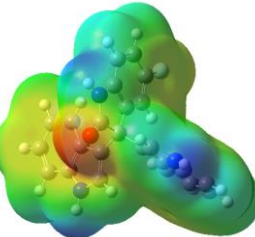 |
| <b>7ad</b> | 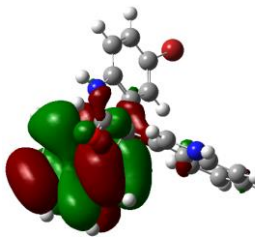<br>-5.3495 | 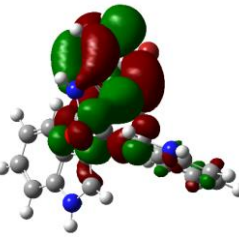<br>-0.5434 | 4.8061        | 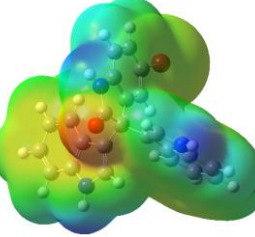 |
| <b>7ae</b> | 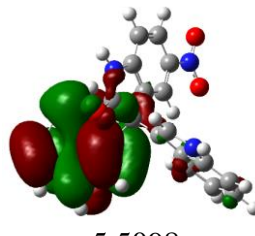<br>-5.5098 | 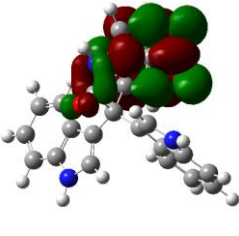<br>-2.1263 | 3.3835        | 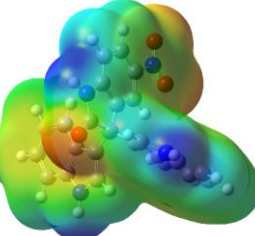 |

|            |                                                                                                |                                                                                                |        |                                                                                       |
|------------|------------------------------------------------------------------------------------------------|------------------------------------------------------------------------------------------------|--------|---------------------------------------------------------------------------------------|
| <b>7af</b> | 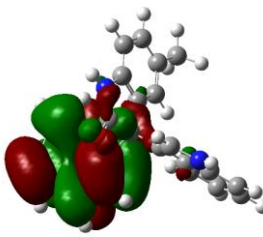<br>-5.2265   | 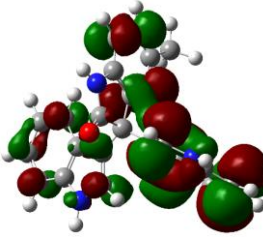<br>-0.2288   | 4.9977 | 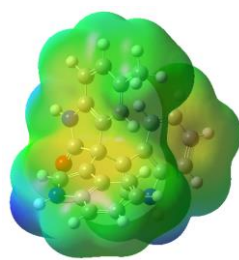   |
| <b>7ag</b> | 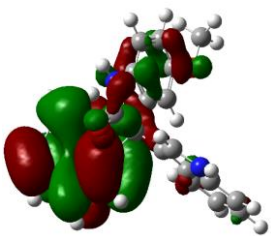<br>-5.1919   | 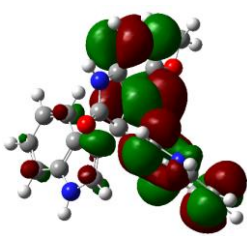<br>-0.2174   | 4.9745 | 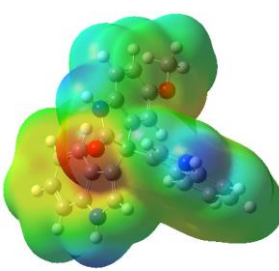   |
| <b>7ah</b> | 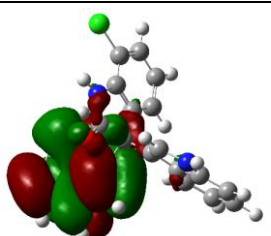<br>-5.3522   | 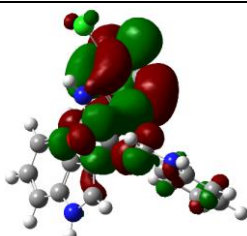<br>-0.5151   | 4.8371 | 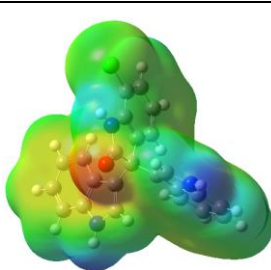  |
| <b>7ba</b> | 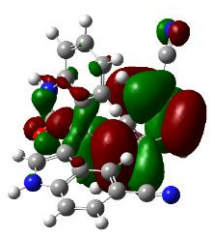<br>-5.9756 | 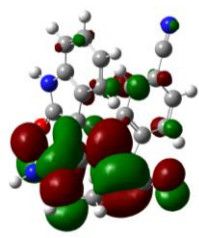<br>-1.7951 | 3.4116 | 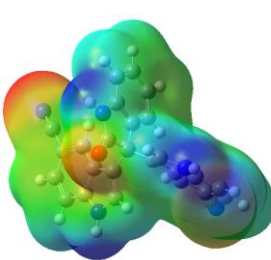 |
| <b>7ca</b> | 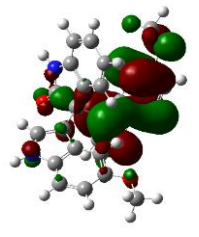<br>-5.0559 | 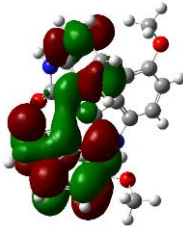<br>-0.2520 | 4.8039 | 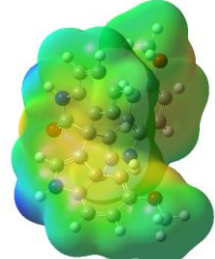 |
| <b>7da</b> | 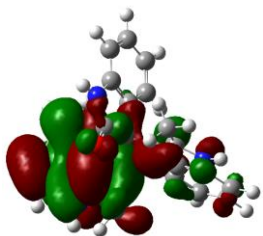<br>-5.0186 | 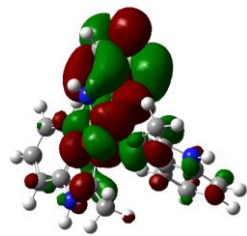<br>-0.3059 | 4.6600 | 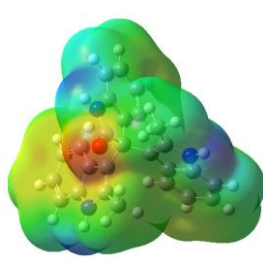 |

|     |                                                                                                |                                                                                                |        |                                                                                       |
|-----|------------------------------------------------------------------------------------------------|------------------------------------------------------------------------------------------------|--------|---------------------------------------------------------------------------------------|
| 7ea | 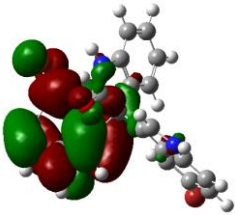<br>-5.5786   | 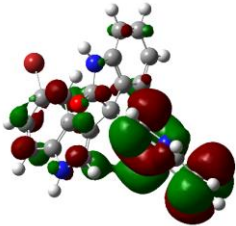<br>-0.6493   | 4.9293 | 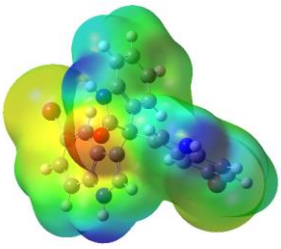   |
| 7ec | 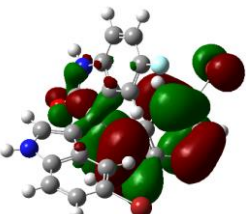<br>-5.6491   | 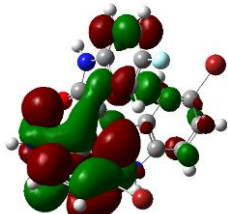<br>-0.7219   | 4.9272 | 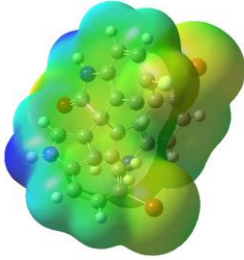   |
| 7ed | 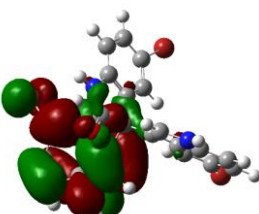<br>-5.6774   | 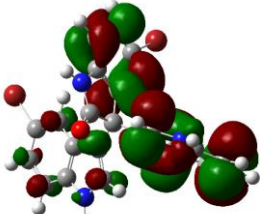<br>-0.7472   | 4.9302 | 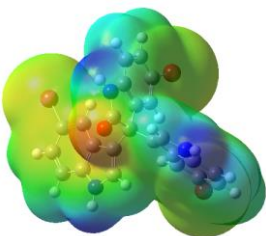  |
| 7fa | 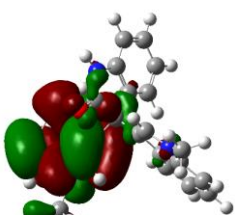<br>-5.1106 | 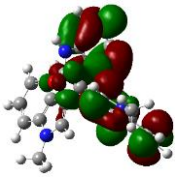<br>-0.2106 | 4.8999 | 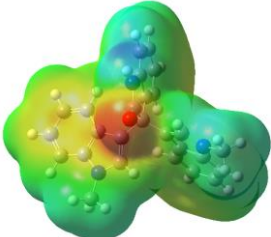 |
| 7fb | 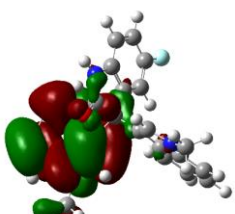<br>-5.1827 | 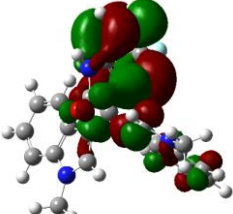<br>-0.4188 | 4.7639 | 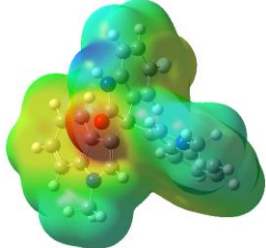 |
| 7fd | 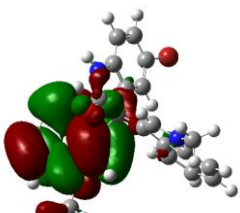<br>-5.2159 | 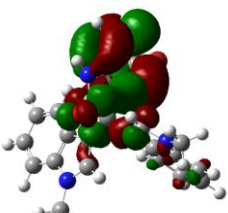<br>-0.5009 | 4.7149 | 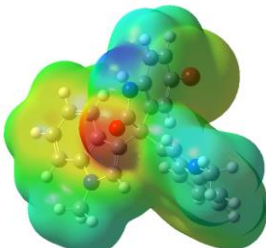 |

|            |                                                                                                |                                                                                                |        |                                                                                       |
|------------|------------------------------------------------------------------------------------------------|------------------------------------------------------------------------------------------------|--------|---------------------------------------------------------------------------------------|
| <b>7ga</b> | 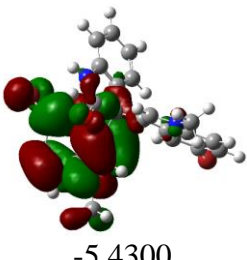<br>-5.4300   | 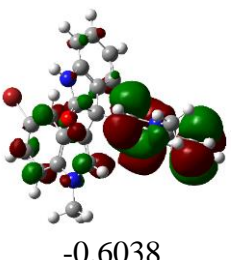<br>-0.6038   | 4.8262 | 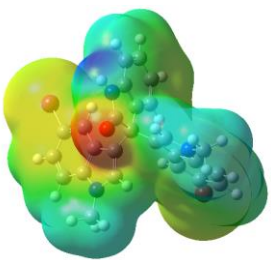   |
| <b>7gc</b> | 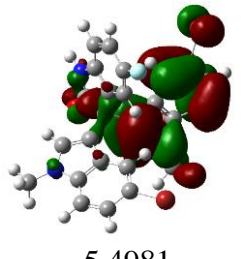<br>-5.4981   | 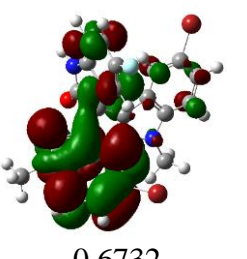<br>-0.6732   | 4.8249 | 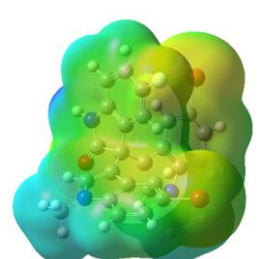   |
| <b>7gd</b> | 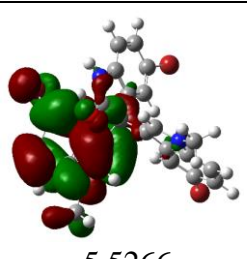<br>-5.5266  | 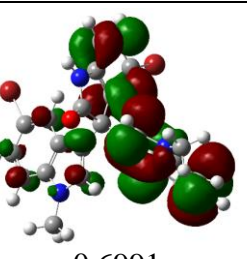<br>-0.6991  | 4.8276 | 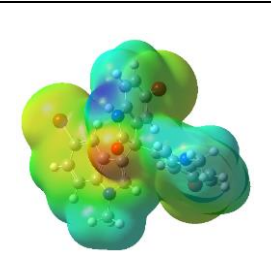  |
| <b>7ai</b> | 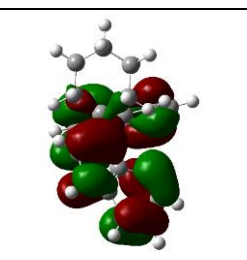<br>-5.0238 | 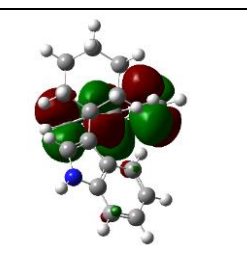<br>-0.1211 | 4.9027 | 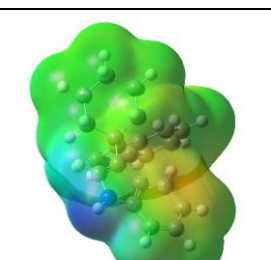 |
| <b>7ei</b> | 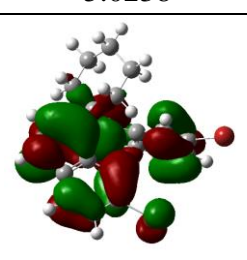<br>-5.3642 | 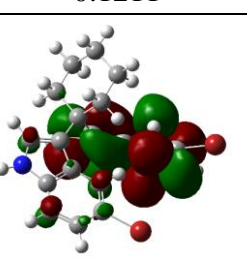<br>-0.5099 | 4.8543 | 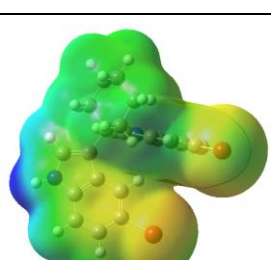 |
| <b>7fi</b> | 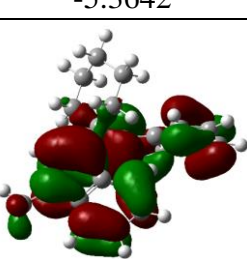<br>-4.8923 | 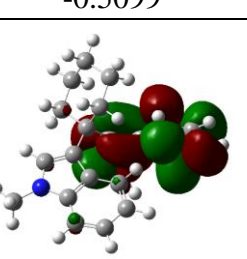<br>-0.0879 | 4.8044 | 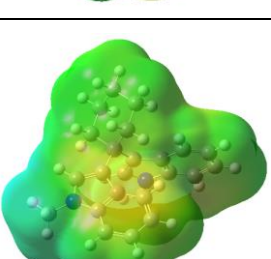 |

|     |                                                                                                |                                                                                                |        |                                                                                       |
|-----|------------------------------------------------------------------------------------------------|------------------------------------------------------------------------------------------------|--------|---------------------------------------------------------------------------------------|
| 7aj | 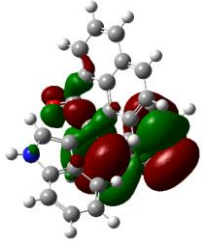<br>-5.1919   | 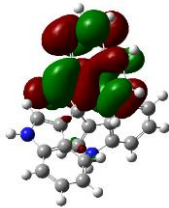<br>-1.8074   | 3.3845 | 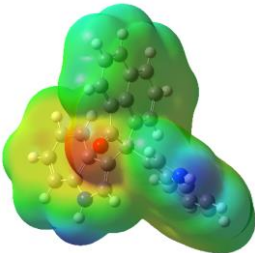   |
| 7cj | 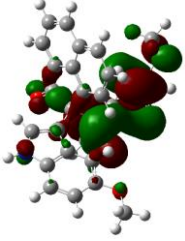<br>-5.9756   | 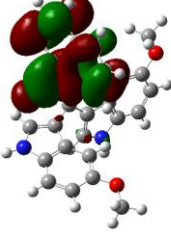<br>-1.1946   | 4.7810 | 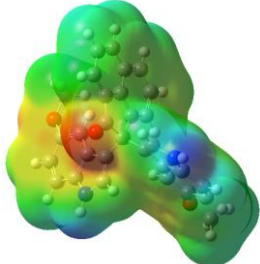   |
| 7dj | 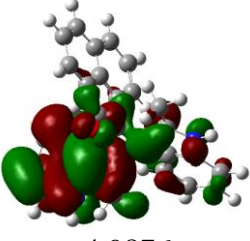<br>-4.9876  | 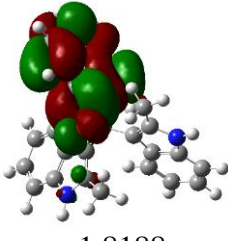<br>-1.8188  | 3.1688 | 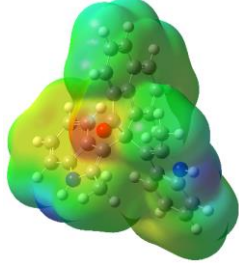  |
| 7ej | 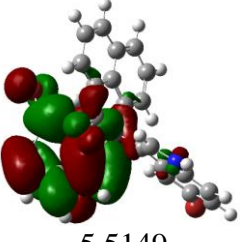<br>-5.5149 | 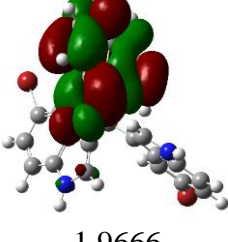<br>-1.9666 | 3.5483 | 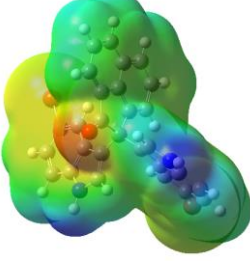 |
| 7fj | 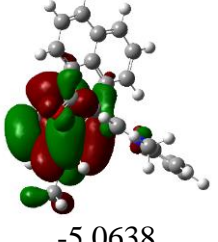<br>-5.0638 | 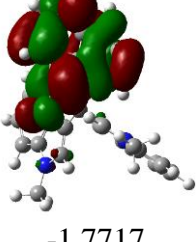<br>-1.7717 | 3.2921 | 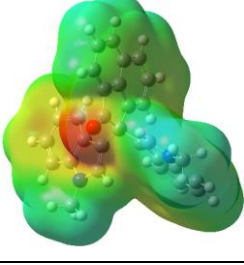 |
| 7gj | 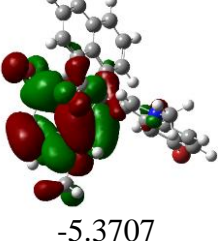<br>-5.3707 | 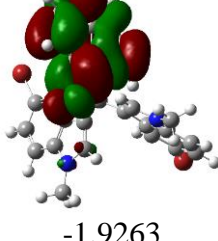<br>-1.9263 | 5.1781 | 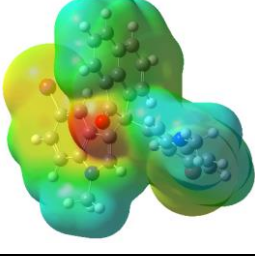 |

|             |                                                                                                |                                                                                                |        |                                                                                       |
|-------------|------------------------------------------------------------------------------------------------|------------------------------------------------------------------------------------------------|--------|---------------------------------------------------------------------------------------|
| <b>7gk</b>  | 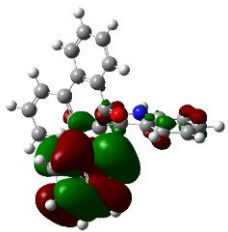<br>-5.2382   | 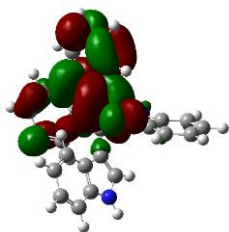<br>-1.5364   | 3.7018 | 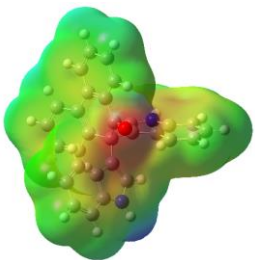   |
| <b>7ck</b>  | 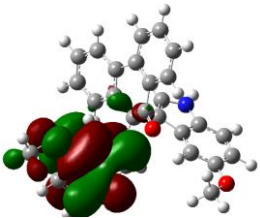<br>-4.9843   | 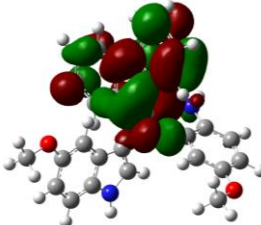<br>-1.4879   | 3.4964 | 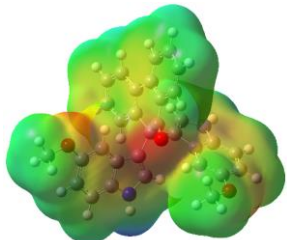   |
| <b>10aa</b> | 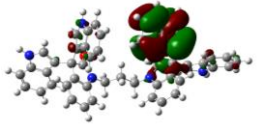<br>-5.1522   | 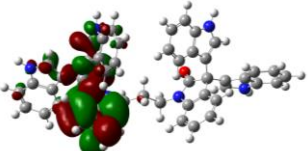<br>-0.2757   | 4.8765 | 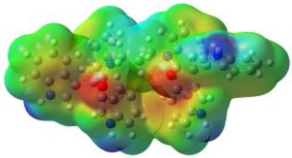   |
| <b>10ab</b> | 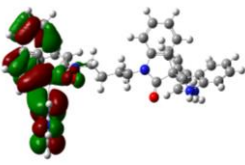<br>-5.2053 | 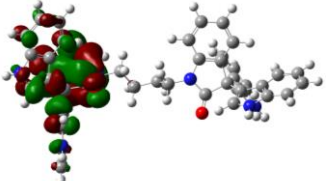<br>-0.2800 | 4.9253 | 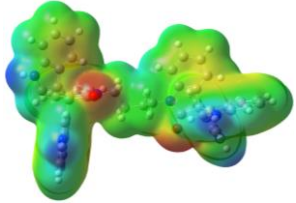 |
| <b>10ac</b> | 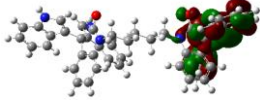<br>-5.1296 | 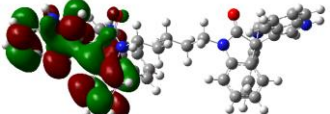<br>-0.2310 | 4.8986 | 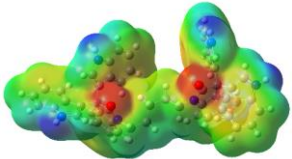 |
| <b>10ad</b> | 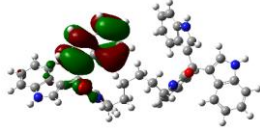<br>-5.1596 | 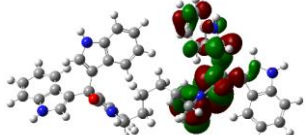<br>-0.2906 | 4.8690 | 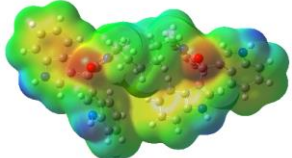 |

**Table S4** Frontier molecular orbitals of HOMO and LUMO of all the synthesized derivatives **7** and **10** obtained at B3LYP/6-31G (d,p) level of theory in gas phase

| Orbitals | 7aa                                                                                 | 7ab                                                                                 | 7ac                                                                                  | 7ad                                                                                   |
|----------|-------------------------------------------------------------------------------------|-------------------------------------------------------------------------------------|--------------------------------------------------------------------------------------|---------------------------------------------------------------------------------------|
| LUMO+3   | 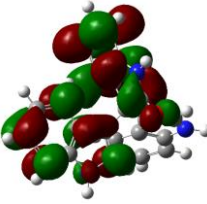   | 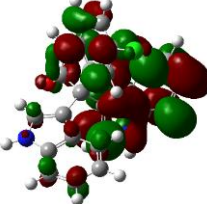   | 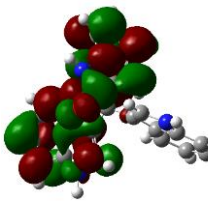   | 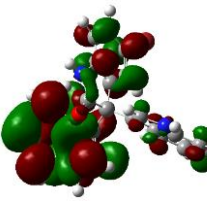   |
| LUMO+2   | 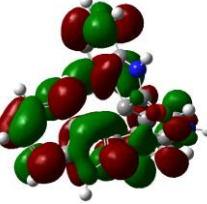   | 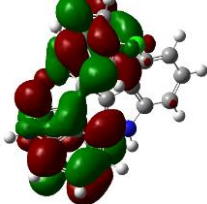   | 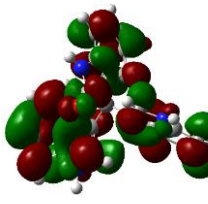   | 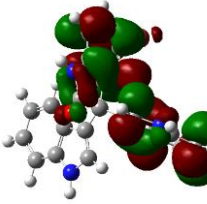   |
| LUMO+1   | 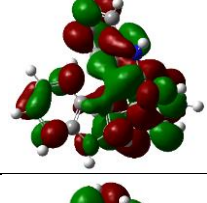  | 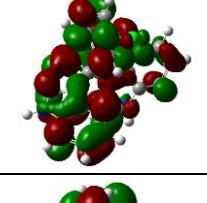  | 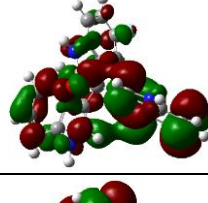  | 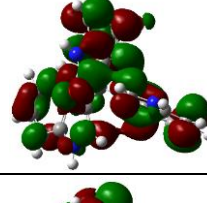  |
| LUMO     | 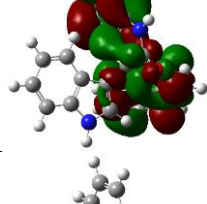 | 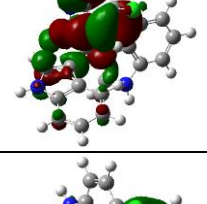 | 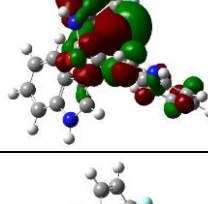 | 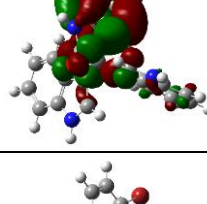 |
| HOMO     | 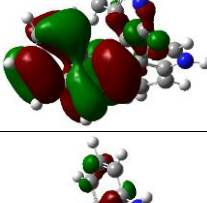 | 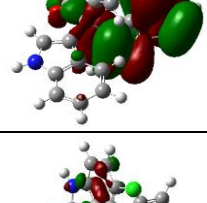 | 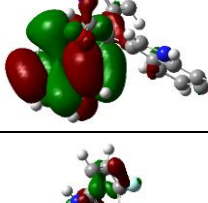 | 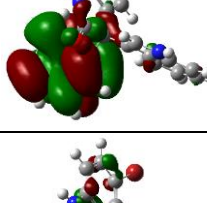 |
| HOMO-1   | 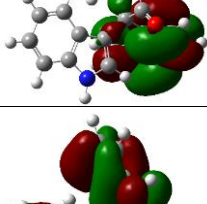 | 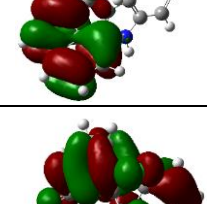 | 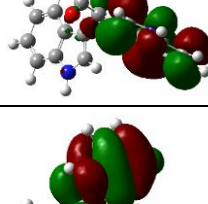 | 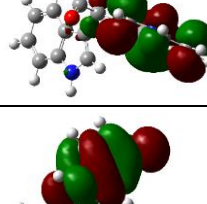 |
| HOMO-2   | 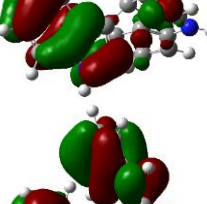 | 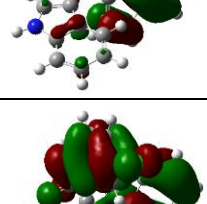 | 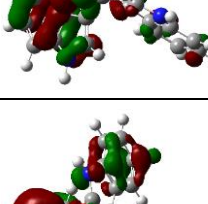 | 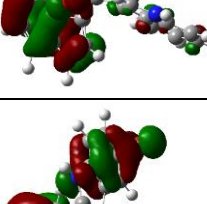 |
| HOMO-3   | 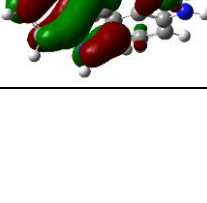 | 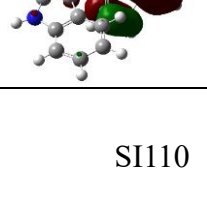 | 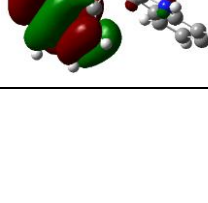 | 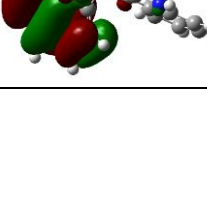 |

| Orbitals | 7ae                                                                                 | 7af                                                                                 | 7ag                                                                                  | 7ah                                                                                   |
|----------|-------------------------------------------------------------------------------------|-------------------------------------------------------------------------------------|--------------------------------------------------------------------------------------|---------------------------------------------------------------------------------------|
| LUMO+3   | 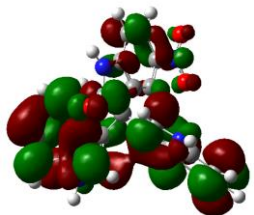   | 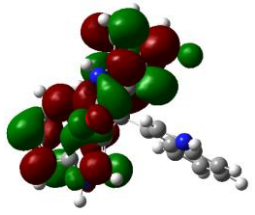   | 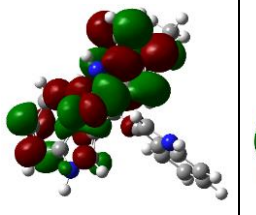   | 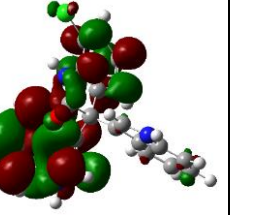   |
| LUMO+2   | 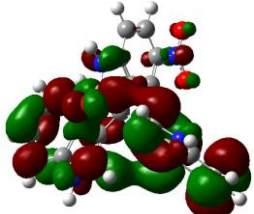   | 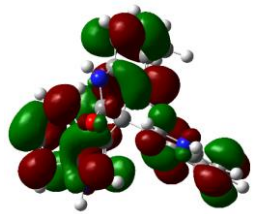   | 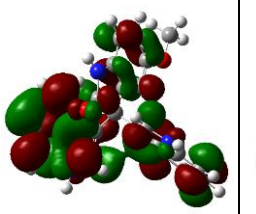   | 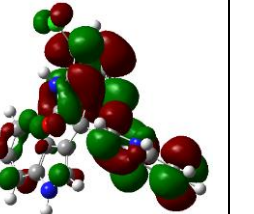   |
| LUMO+1   | 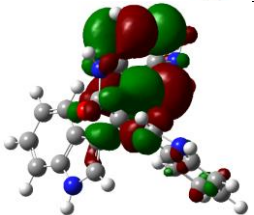   | 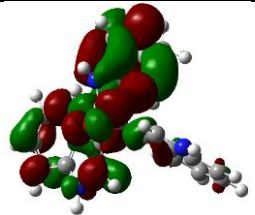   | 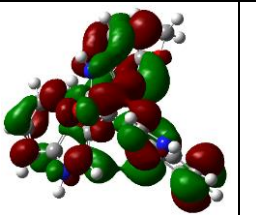   | 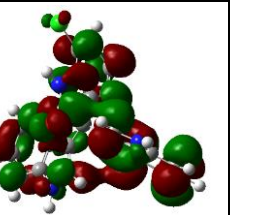   |
| LUMO     | 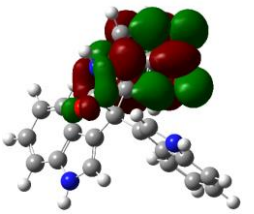  | 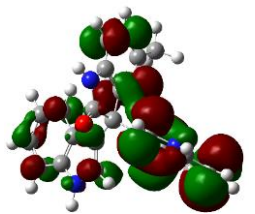  | 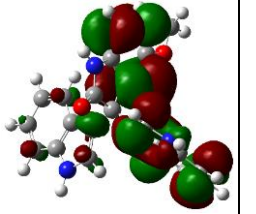  | 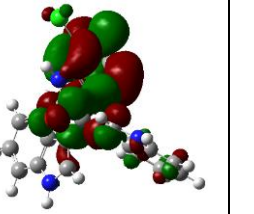  |
| HOMO     | 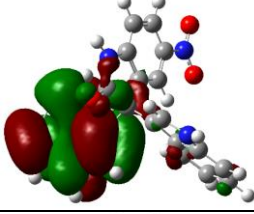 | 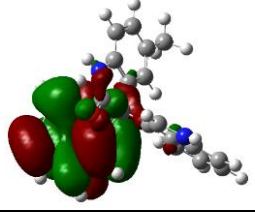 | 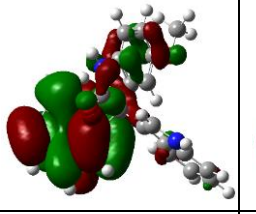 | 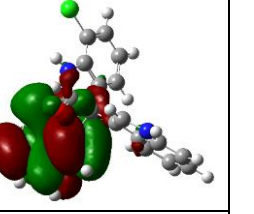 |
| HOMO-1   | 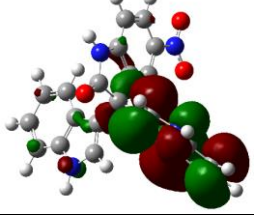 | 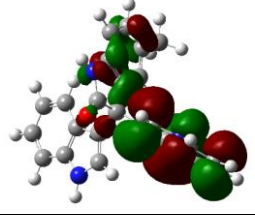 | 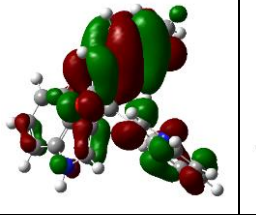 | 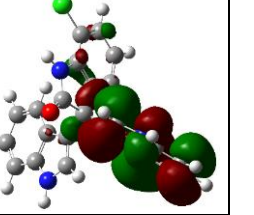 |
| HOMO-2   | 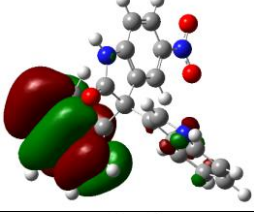 | 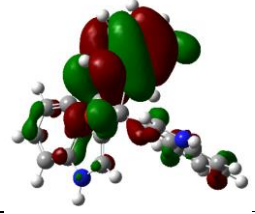 | 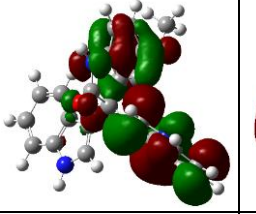 | 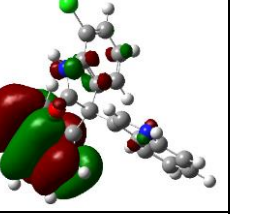 |
| HOMO-3   | 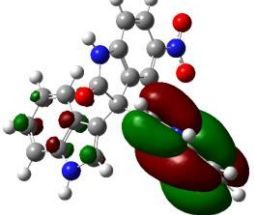 | 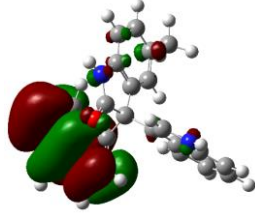 | 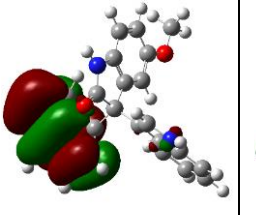 | 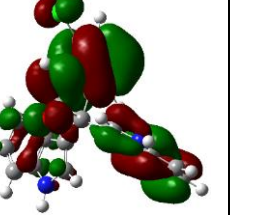 |

| Orbitals | 7ba                                                                                 | 7ca                                                                                 | 7da                                                                                  | 7ea                                                                                   |
|----------|-------------------------------------------------------------------------------------|-------------------------------------------------------------------------------------|--------------------------------------------------------------------------------------|---------------------------------------------------------------------------------------|
| LUMO+3   | 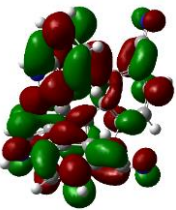   | 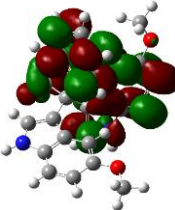   | 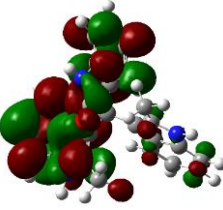   | 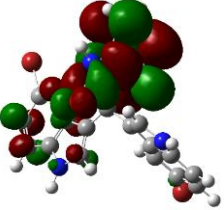   |
| LUMO+2   | 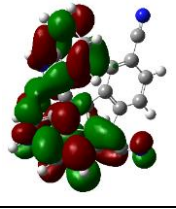   | 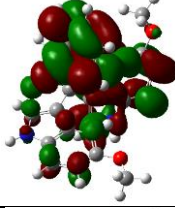   | 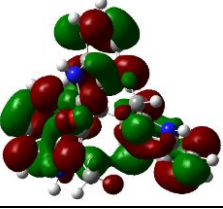   | 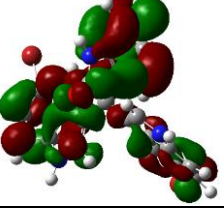   |
| LUMO+1   | 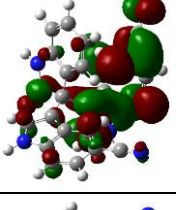   | 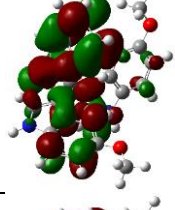   | 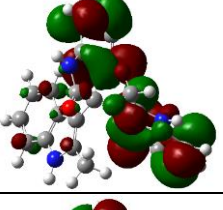   | 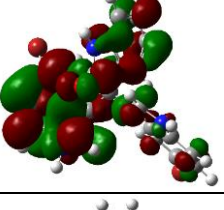   |
| LUMO     | 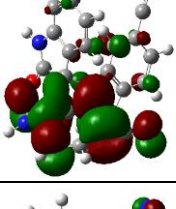  | 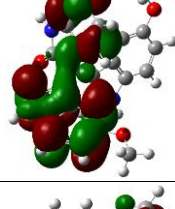  | 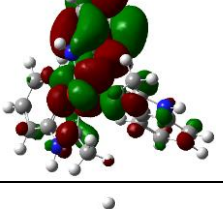  | 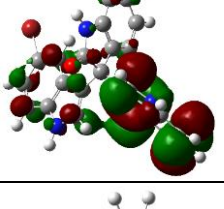  |
| HOMO     | 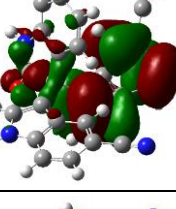 | 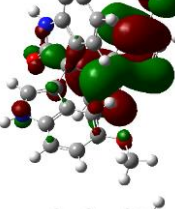 | 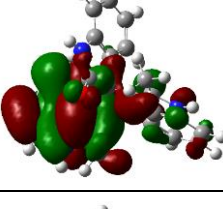 | 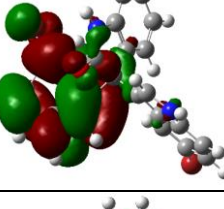 |
| HOMO-1   | 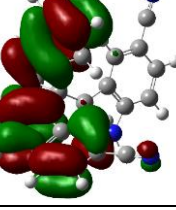 | 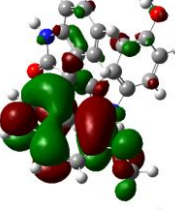 | 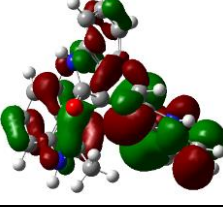 | 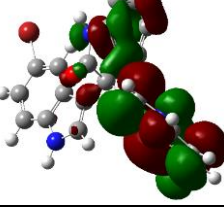 |
| HOMO-2   | 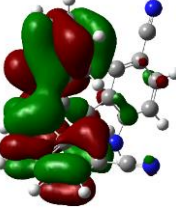 | 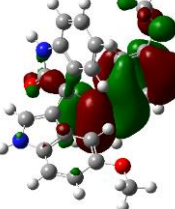 | 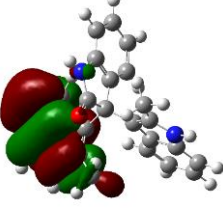 | 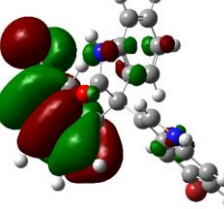 |
| HOMO-3   | 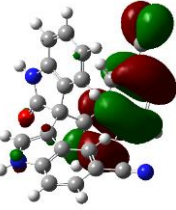 | 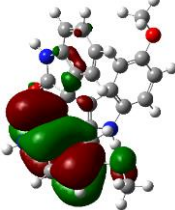 | 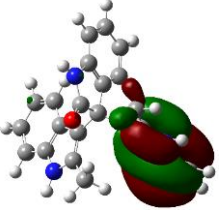 | 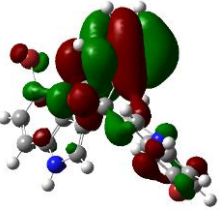 |

| Orbitals | 7ec                                                                                 | 7ed                                                                                 | 7fa                                                                                  | 7fb                                                                                   |
|----------|-------------------------------------------------------------------------------------|-------------------------------------------------------------------------------------|--------------------------------------------------------------------------------------|---------------------------------------------------------------------------------------|
| LUMO+3   | 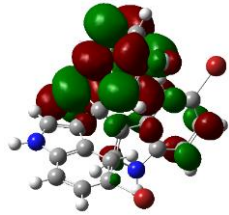   | 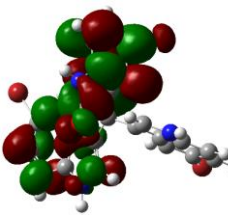   | 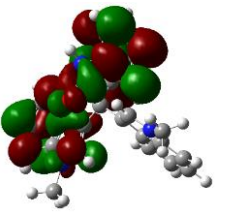   | 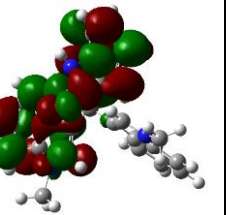   |
| LUMO+2   | 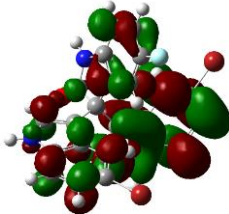   | 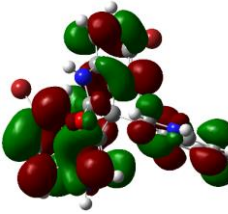   | 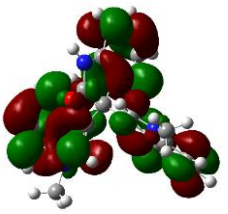   | 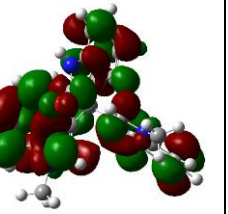   |
| LUMO+1   | 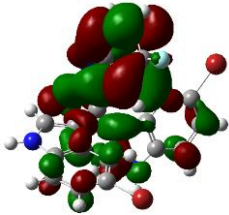   | 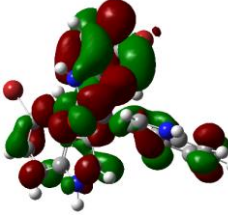   | 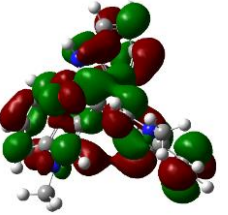   | 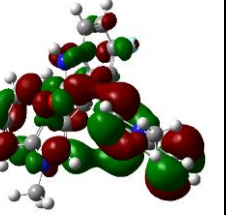   |
| LUMO     | 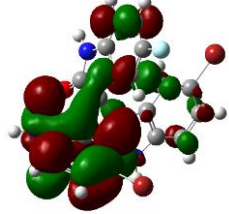  | 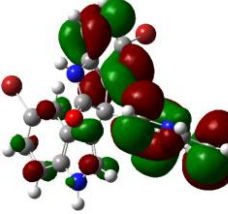  | 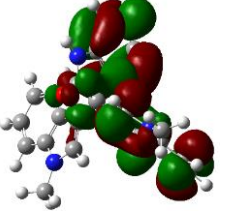  | 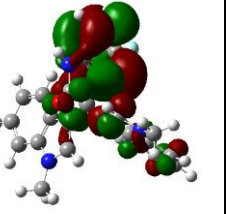  |
| HOMO     | 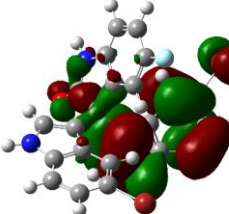 | 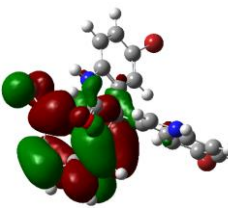 | 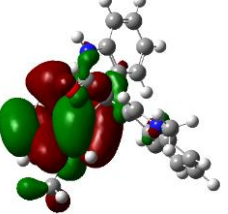 | 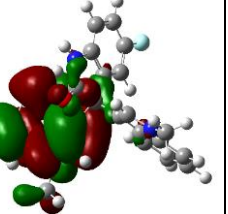 |
| HOMO-1   | 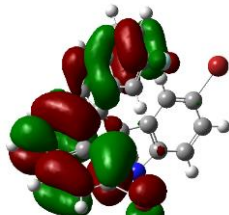 | 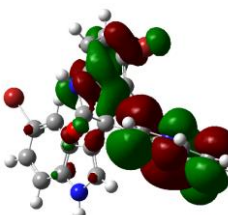 | 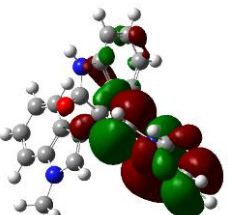 | 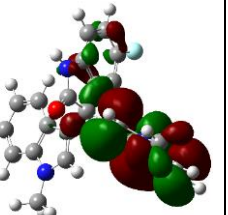 |
| HOMO-2   | 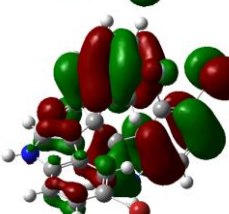 | 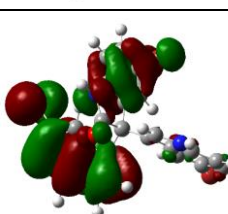 | 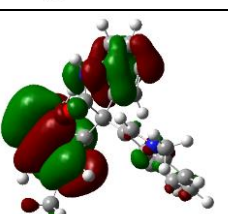 | 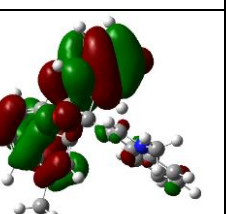 |
| HOMO-3   | 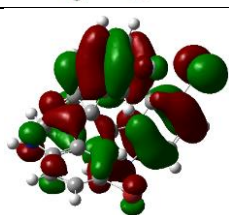 | 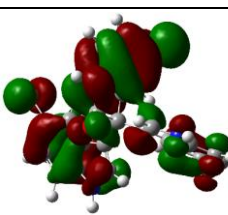 | 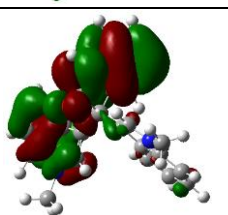 | 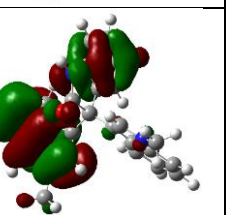 |

| Orbitals | 7fd                                                                                 | 7ga                                                                                 | 7gc                                                                                  | 7gd                                                                                   |
|----------|-------------------------------------------------------------------------------------|-------------------------------------------------------------------------------------|--------------------------------------------------------------------------------------|---------------------------------------------------------------------------------------|
| LUMO+3   | 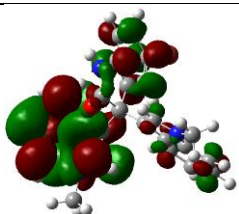   | 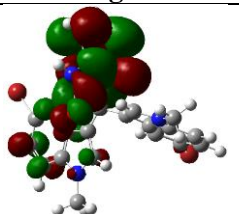   | 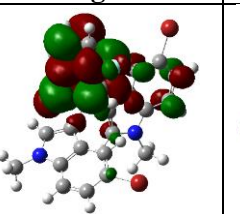   | 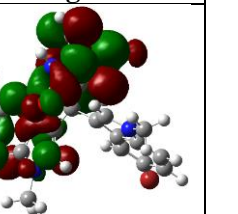   |
| LUMO+2   | 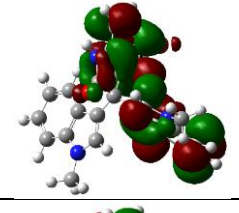   | 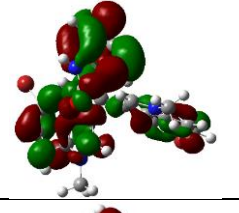   | 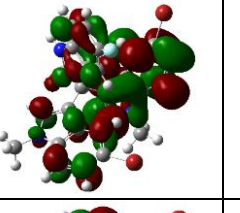   | 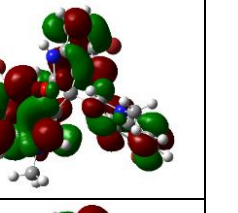   |
| LUMO+1   | 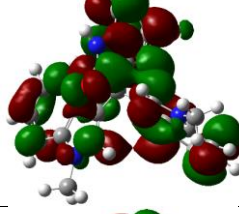   | 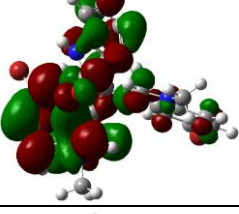   | 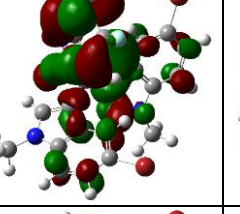   | 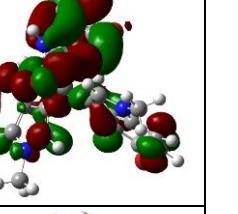   |
| LUMO     | 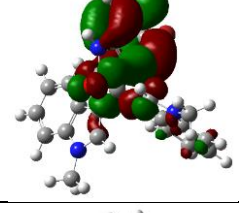  | 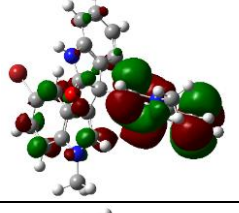  | 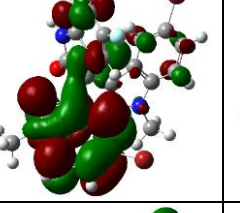  | 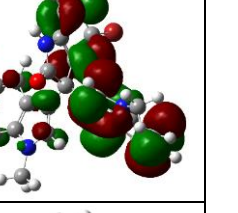  |
| HOMO     | 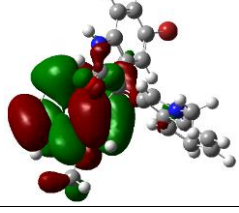 | 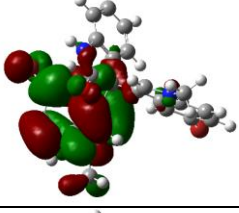 | 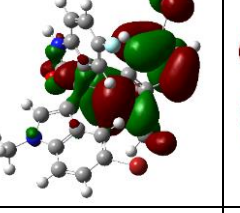 | 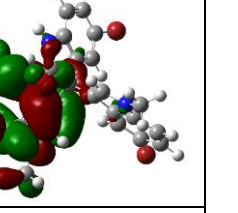 |
| HOMO-1   | 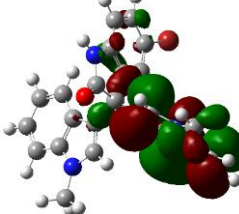 | 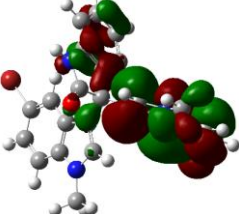 | 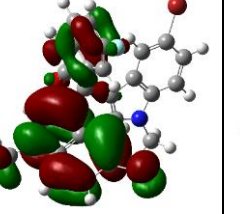 | 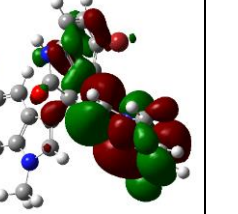 |
| HOMO-2   | 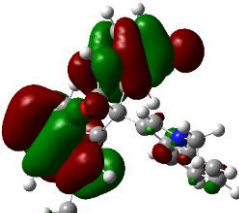 | 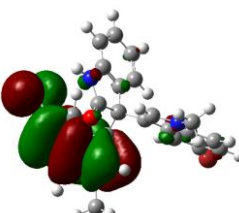 | 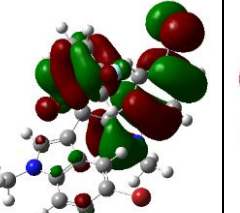 | 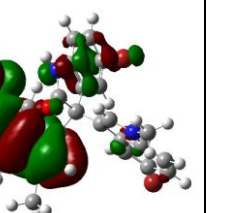 |
| HOMO-3   | 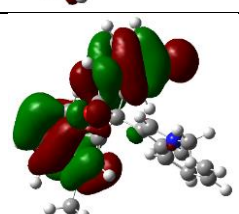 | 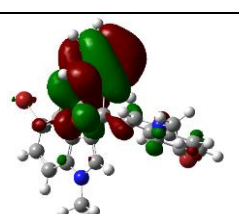 | 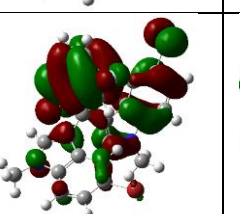 | 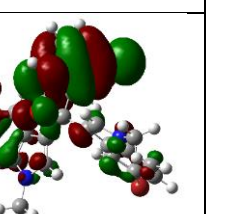 |

| Orbitals | 7ai                                                                                 | 7ei                                                                                 | 7fi                                                                                  | 7aj                                                                                   |
|----------|-------------------------------------------------------------------------------------|-------------------------------------------------------------------------------------|--------------------------------------------------------------------------------------|---------------------------------------------------------------------------------------|
| LUMO+3   | 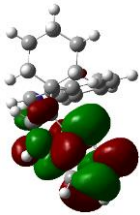   | 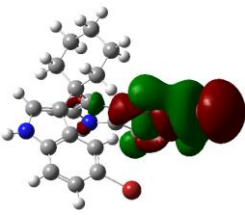   | 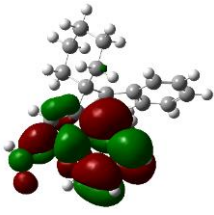   | 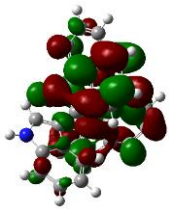   |
| LUMO+2   | 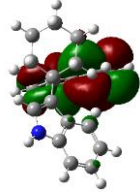   | 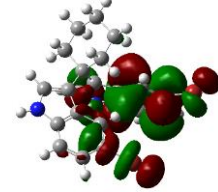   | 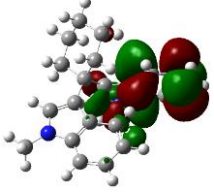   | 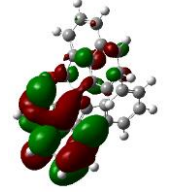   |
| LUMO+1   | 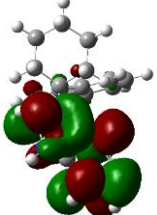   | 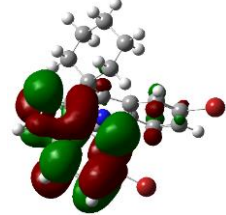   | 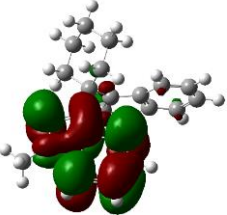   | 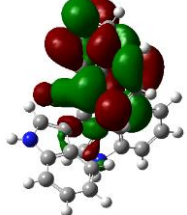   |
| LUMO     | 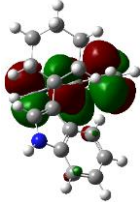  | 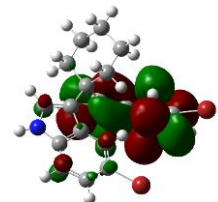  | 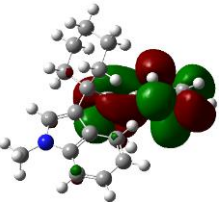  | 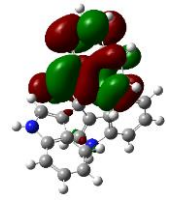  |
| HOMO     | 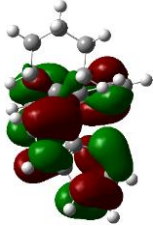 | 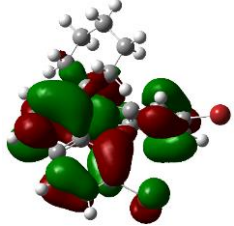 | 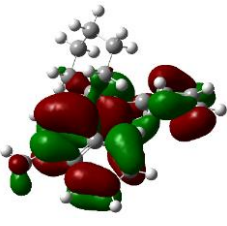 | 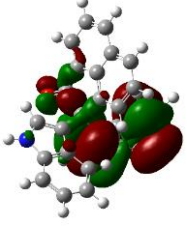 |
| HOMO-1   | 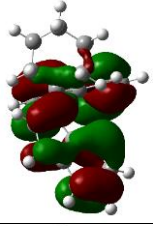 | 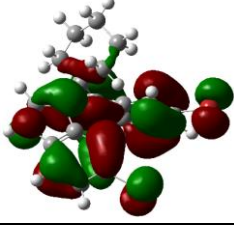 | 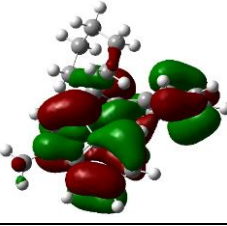 | 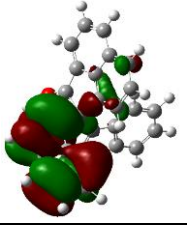 |
| HOMO-2   | 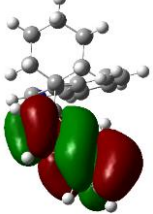 | 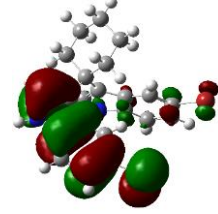 | 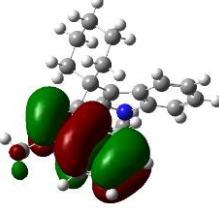 | 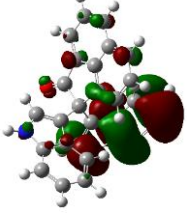 |
| HOMO-3   | 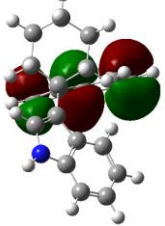 | 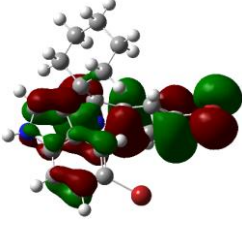 | 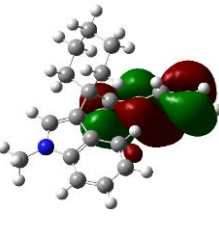 | 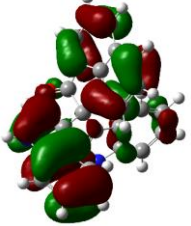 |

| Orbitals | 7cj                                                                                 | 7dj                                                                                 | 7ej                                                                                  | 7fj                                                                                   |
|----------|-------------------------------------------------------------------------------------|-------------------------------------------------------------------------------------|--------------------------------------------------------------------------------------|---------------------------------------------------------------------------------------|
| LUMO+3   | 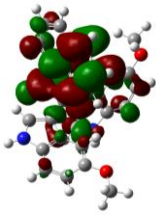   | 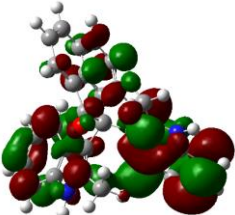   | 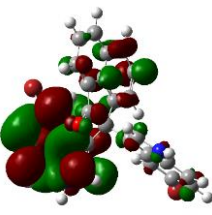   | 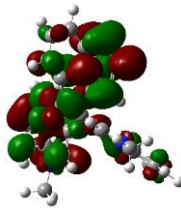   |
| LUMO+2   | 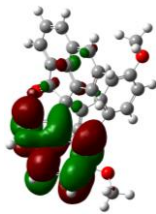   | 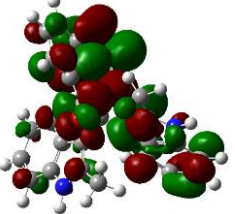   | 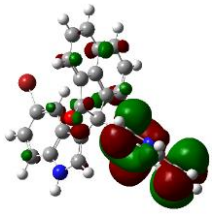   | 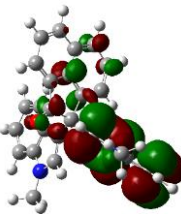   |
| LUMO+1   | 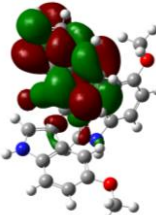   | 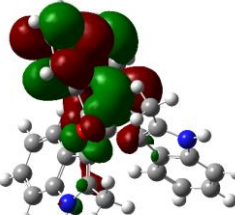   | 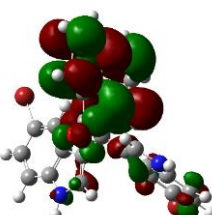   | 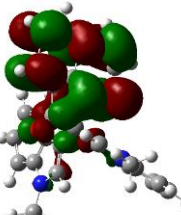   |
| LUMO     | 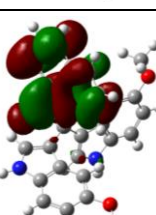  | 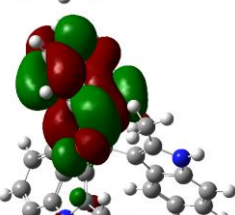  | 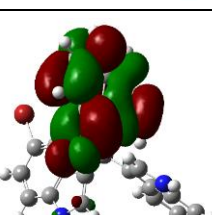  | 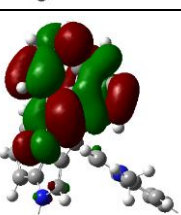  |
| HOMO     | 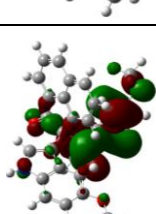 | 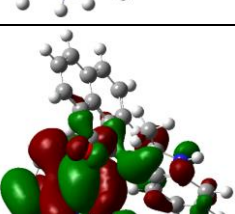 | 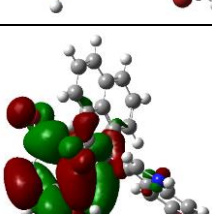 | 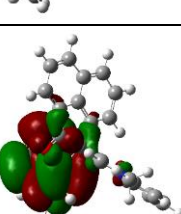 |
| HOMO-1   | 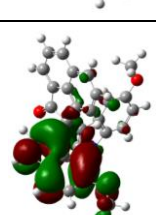 | 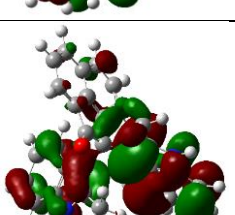 | 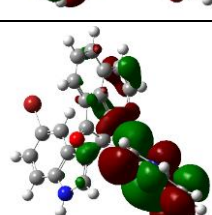 | 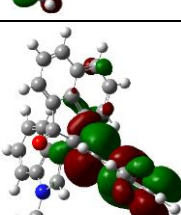 |
| HOMO-2   | 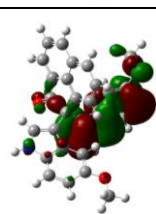 | 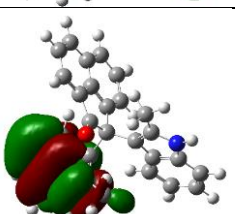 | 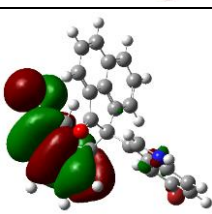 | 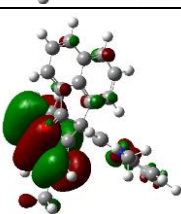 |
| HOMO-3   | 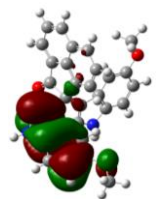 | 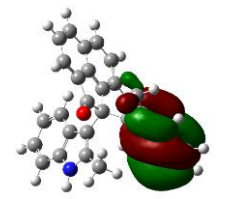 | 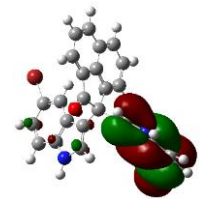 | 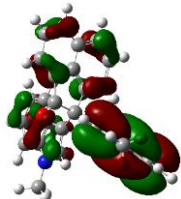 |

| Orbitals | 7gj                                                                                 | 7gk                                                                                 | 7ck                                                                                  |  |
|----------|-------------------------------------------------------------------------------------|-------------------------------------------------------------------------------------|--------------------------------------------------------------------------------------|--|
| LUMO+3   | 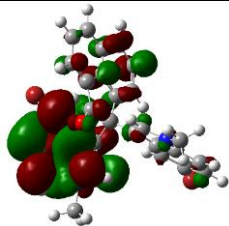   | 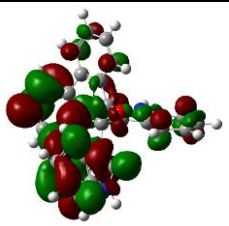   | 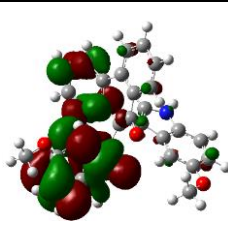   |  |
| LUMO+2   | 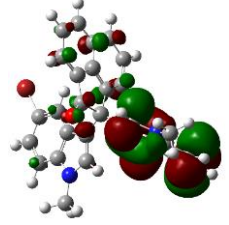   | 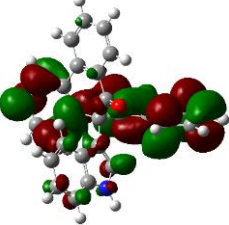   | 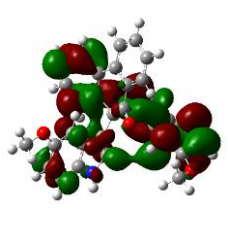   |  |
| LUMO+1   | 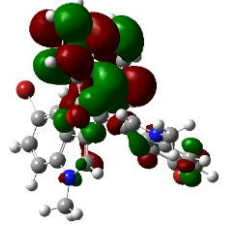   | 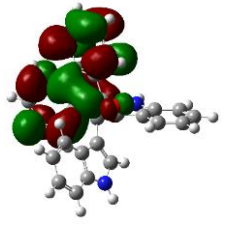   | 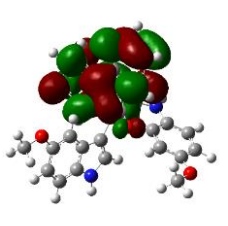   |  |
| LUMO     | 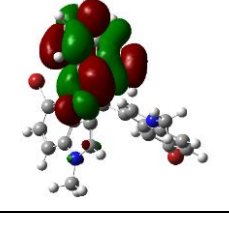  | 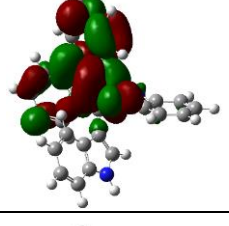  | 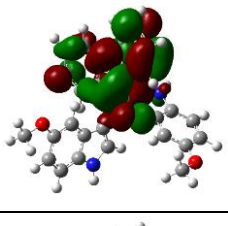  |  |
| HOMO     | 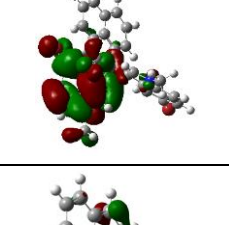 | 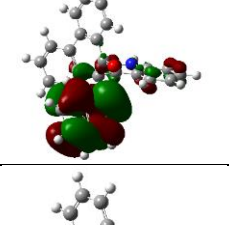 | 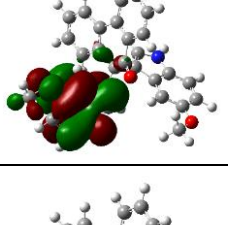 |  |
| HOMO-1   | 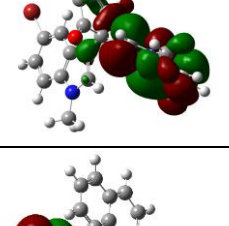 | 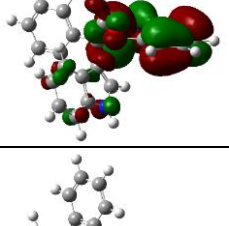 | 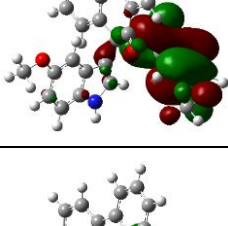 |  |
| HOMO-2   | 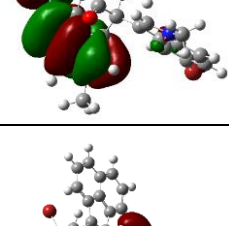 | 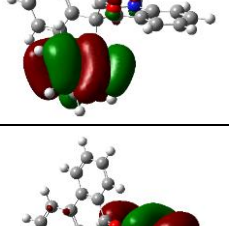 | 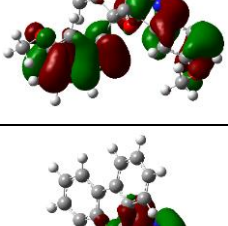 |  |
| HOMO-3   | 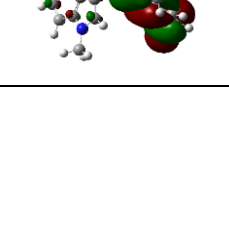 | 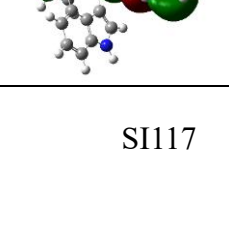 | 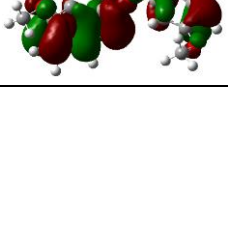 |  |

| Orbitals | 10aa                                                                                | 10ab                                                                                | 10ac                                                                                 | 10ad                                                                                  |
|----------|-------------------------------------------------------------------------------------|-------------------------------------------------------------------------------------|--------------------------------------------------------------------------------------|---------------------------------------------------------------------------------------|
| LUMO+3   | 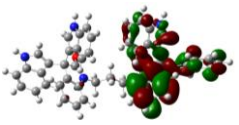   | 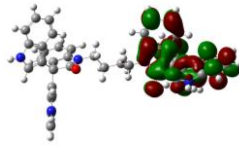   | 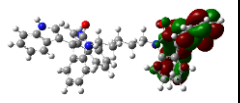   | 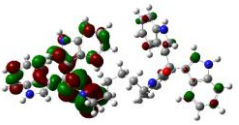   |
| LUMO+2   | 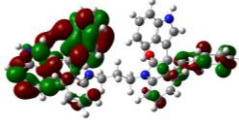   | 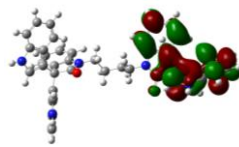   | 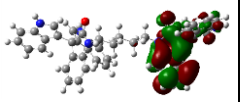   | 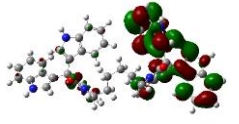   |
| LUMO+1   | 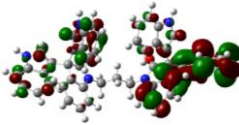   | 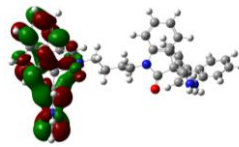   | 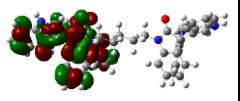   | 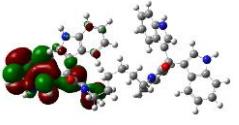   |
| LUMO     | 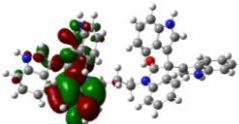  | 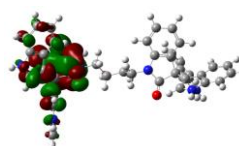  | 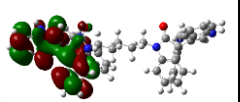  | 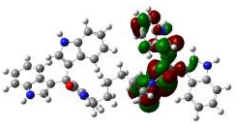  |
| HOMO     | 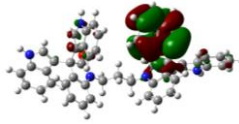 | 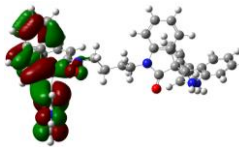 | 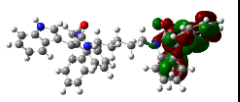 | 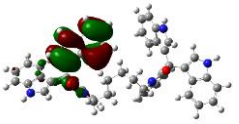 |
| HOMO-1   | 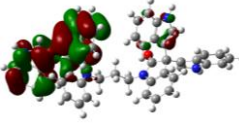 | 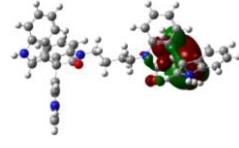 | 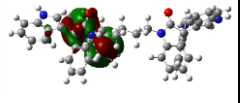 | 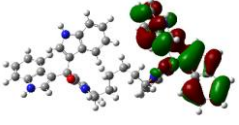 |
| HOMO-2   | 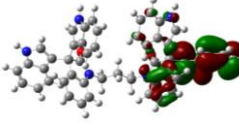 | 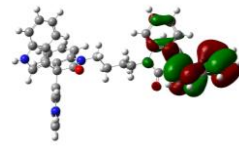 | 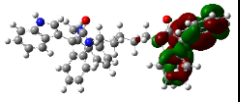 | 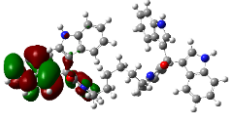 |
| HOMO-3   | 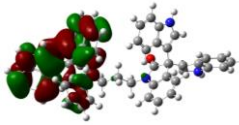 | 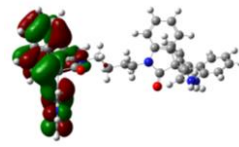 | 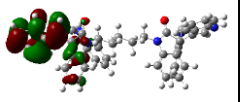 | 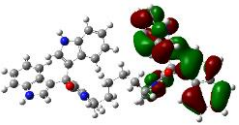 |

**Table S5** Theoretical UV-Vis Characteristics of synthesized derivatives

| S. No | Code       | Excitation energy/<br>Theoretical $\lambda_{\text{abs}}$ (nm) | Oscillator<br>strength | Key transitions*                                               |
|-------|------------|---------------------------------------------------------------|------------------------|----------------------------------------------------------------|
| 1     | <b>7aa</b> | 266.76                                                        | 0.0598                 | H-1 $\rightarrow$ L (51.19%)<br>H-1 $\rightarrow$ L+1 (29.09%) |
| 2     | <b>7ab</b> | 261.85                                                        | 0.0501                 | H-1 $\rightarrow$ L+2 (65.13%)                                 |
| 3     | <b>7ac</b> | 270.36                                                        | 0.0399                 | H $\rightarrow$ L+2 (51.10%)                                   |
| 4     | <b>7ad</b> | 262.09                                                        | 0.0485                 | H-1 $\rightarrow$ L+2 (65.97%)                                 |
| 5     | <b>7ae</b> | 307.91                                                        | 0.1608                 | H-4 $\rightarrow$ L (70.64%)<br>H $\rightarrow$ L+1 (25.82%)   |
| 6     | <b>7af</b> | 267.85                                                        | 0.0549                 | H-1 $\rightarrow$ L (72.30%)                                   |
| 7     | <b>7ag</b> | 266.77                                                        | 0.0504                 | H $\rightarrow$ L+2 (75.68%)                                   |
| 8     | <b>7ah</b> | 261.22                                                        | 0.0501                 | H-1 $\rightarrow$ L+2 (59.96%)                                 |
| 9     | <b>7ba</b> | 284.57                                                        | 0.0478                 | H-1 $\rightarrow$ L (89.45%)                                   |
| 10    | <b>7ca</b> | 282.39                                                        | 0.0473                 | H-2 $\rightarrow$ L+1 (32.59%)<br>H-1 $\rightarrow$ L (37.36%) |
| 11    | <b>7da</b> | 266.20                                                        | 0.0546                 | H $\rightarrow$ L+3 (50.71%)                                   |
| 12    | <b>7ea</b> | 267.20                                                        | 0.0501                 | H-1 $\rightarrow$ L+1 (72.76%)                                 |
| 13    | <b>7ec</b> | 273.87                                                        | 0.0674                 | H-1 $\rightarrow$ L (30.10%)<br>H-1 $\rightarrow$ L+1 (62.49%) |
| 14    | <b>7ed</b> | 273.77                                                        | 0.0569                 | H-1 $\rightarrow$ L (59.04%)                                   |
| 15    | <b>7fa</b> | 273.17                                                        | 0.0775                 | H-1 $\rightarrow$ L (62.75%)<br>H-1 $\rightarrow$ L+1 (25.65%) |
| 16    | <b>7fb</b> | 288.70                                                        | 0.0408                 | H-1 $\rightarrow$ L (90.31%)                                   |
| 17    | <b>7fd</b> | 268.17                                                        | 0.0615                 | H-2 $\rightarrow$ L (22.52%)<br>H $\rightarrow$ L+3 (35.29%)   |
| 18    | <b>7ga</b> | 272.69                                                        | 0.0488                 | H-1 $\rightarrow$ L+1 (75.17%)                                 |
| 19    | <b>7gc</b> | 279.67                                                        | 0.0790                 | H-1 $\rightarrow$ L (77.15%)                                   |
| 20    | <b>7gd</b> | 279.69                                                        | 0.0785                 | H-1 $\rightarrow$ L+1 (86.01%)                                 |
| 21    | <b>7ai</b> | 224.59                                                        | 0.0634                 | H-1 $\rightarrow$ L+2 (26.06%)<br>H $\rightarrow$ L+2 (63.58%) |
| 22    | <b>7ei</b> | 262.62                                                        | 0.0226                 | H-2 $\rightarrow$ L+1 (26.51%)<br>H $\rightarrow$ L+1 (38.07%) |
| 23    | <b>7fi</b> | 229.89                                                        | 0.0569                 | H-1 $\rightarrow$ L+2 (28.45%)<br>H $\rightarrow$ L+2 (57.29%) |
| 24    | <b>7aj</b> | 331.73                                                        | 0.0691                 | H-4 $\rightarrow$ L (91.11%)                                   |
| 25    | <b>7cj</b> | 334.37                                                        | 0.0901                 | H-4 $\rightarrow$ L (92.91%)                                   |
| 26    | <b>7dj</b> | 333.84                                                        | 0.0773                 | H-4 $\rightarrow$ L (87.66%)                                   |

|    |             |        |        |                                                            |
|----|-------------|--------|--------|------------------------------------------------------------|
| 27 | <b>7ej</b>  | 333.68 | 0.0801 | H-4 → L (93.48%)                                           |
| 28 | <b>7fj</b>  | 332.47 | 0.0805 | H-4 → L (93.12%)                                           |
| 29 | <b>7gj</b>  | 334.00 | 0.0844 | H-4 → L (93.45%)                                           |
| 30 | <b>7gk</b>  | 314.77 | 0.0485 | H-4 → L (38.46%)<br>H-1 → L+1 (36.33%)                     |
| 31 | <b>7ck</b>  | 310.90 | 0.0481 | H-5 → L (22.02%)<br>H-4 → L (40.01%)<br>H-1 → L+1 (21.71%) |
| 32 | <b>10aa</b> | 268.95 | 0.0237 | H → L+5 (53.77%)                                           |
| 33 | <b>10ab</b> | 268.08 | 0.0532 | H-2 → L+2 (53.54%)                                         |
| 34 | <b>10ac</b> | 268.10 | 0.0471 | H-1 → L+4 (60.99%)                                         |
| 35 | <b>10ad</b> | 269.45 | 0.0212 | H → L+5 (67.95%)                                           |

**Table S6** Binding affinity of BSA-ligand **7** calculated from Molecular docking studies (kcal mol<sup>-1</sup>) using AutoDock Vina

| S. No | Ligand     | BSA Binding affinity ( $\Delta G_{\text{binding}}$ ) | S. No | Ligand     | BSA Binding affinity ( $\Delta G_{\text{binding}}$ ) |
|-------|------------|------------------------------------------------------|-------|------------|------------------------------------------------------|
| 1     | <b>7aa</b> | -8.7                                                 | 17    | <b>7fd</b> | -8.7                                                 |
| 2     | <b>7ab</b> | -8.2                                                 | 18    | <b>7ga</b> | -8.0                                                 |
| 3     | <b>7ac</b> | -8.2                                                 | 19    | <b>7gc</b> | -8.0                                                 |
| 4     | <b>7ad</b> | -8.4                                                 | 20    | <b>7gd</b> | -7.9                                                 |
| 5     | <b>7ae</b> | -8.5                                                 | 21    | <b>7ai</b> | -9.4                                                 |
| 6     | <b>7af</b> | -9.2                                                 | 22    | <b>7ei</b> | -8.8                                                 |
| 7     | <b>7ag</b> | -8.7                                                 | 23    | <b>7fi</b> | -8.2                                                 |
| 8     | <b>7ah</b> | -8.2                                                 | 24    | <b>7aj</b> | -10.2                                                |
| 9     | <b>7ba</b> | -8.9                                                 | 25    | <b>7cj</b> | -9.1                                                 |
| 10    | <b>7ca</b> | -8.4                                                 | 26    | <b>7dj</b> | -9.5                                                 |
| 11    | <b>7da</b> | -9.0                                                 | 27    | <b>7ej</b> | -9.2                                                 |
| 12    | <b>7ea</b> | -8.3                                                 | 28    | <b>7fj</b> | -9.1                                                 |
| 13    | <b>7ec</b> | -9.0                                                 | 29    | <b>7gj</b> | -9.4                                                 |
| 14    | <b>7ed</b> | -9.0                                                 | 30    | <b>7gk</b> | -9.3                                                 |
| 15    | <b>7fa</b> | -9.7                                                 | 31    | <b>7ck</b> | -8.6                                                 |
| 16    | <b>7fb</b> | -9.0                                                 |       |            |                                                      |

**Table S7** Binding affinity of DNA with ligand **7** calculated from Molecular docking studies (kcal mol<sup>-1</sup>) using AutoDock Vina

| S. No | Ligand     | BSA Binding affinity ( $\Delta G_{\text{binding}}$ ) | S. No | Ligand     | BSA Binding affinity ( $\Delta G_{\text{binding}}$ ) |
|-------|------------|------------------------------------------------------|-------|------------|------------------------------------------------------|
| 1     | <b>7aa</b> | -8.2                                                 | 17    | <b>7fd</b> | -7.7                                                 |
| 2     | <b>7ab</b> | -8.9                                                 | 18    | <b>7ga</b> | -7.3                                                 |
| 3     | <b>7ac</b> | -8.9                                                 | 19    | <b>7gc</b> | -7.3                                                 |
| 4     | <b>7ad</b> | -8.9                                                 | 20    | <b>7gd</b> | -7.3                                                 |
| 5     | <b>7ae</b> | -8.6                                                 | 21    | <b>7ai</b> | -8.3                                                 |
| 6     | <b>7af</b> | -8.7                                                 | 22    | <b>7ei</b> | -8.3                                                 |
| 7     | <b>7ag</b> | -8.2                                                 | 23    | <b>7fi</b> | -7.0                                                 |
| 8     | <b>7ah</b> | -8.6                                                 | 24    | <b>7aj</b> | -8.7                                                 |
| 9     | <b>7ba</b> | -8.8                                                 | 25    | <b>7cj</b> | -7.9                                                 |
| 10    | <b>7ca</b> | -8.6                                                 | 26    | <b>7dj</b> | -7.5                                                 |
| 11    | <b>7da</b> | -8.2                                                 | 27    | <b>7ej</b> | -9.0                                                 |
| 12    | <b>7ea</b> | -8.8                                                 | 28    | <b>7fj</b> | -7.8                                                 |
| 13    | <b>7ec</b> | -8.8                                                 | 29    | <b>7gj</b> | -8.0                                                 |
| 14    | <b>7ed</b> | -8.8                                                 | 30    | <b>7gk</b> | -8.6                                                 |
| 15    | <b>7fa</b> | -7.7                                                 | 31    | <b>7ck</b> | -8.1                                                 |
| 16    | <b>7fb</b> | -7.7                                                 |       |            |                                                      |

**Table S8** The binding site residues of BSA with derivatives **7** as determined from Autodock Vina

|            | Conventional Hydrogen Bonding           | Pi-Donor Hydrogen Bonding | Carbon Hydrogen Bond | Pi-cation         | Pi-anion                     | Pi-Pi T-shaped/ Pi-Pi stacked | Pi-Sigma          | Alkyl/ Pi-Alkyl                        | Amide-Pi Stacked |
|------------|-----------------------------------------|---------------------------|----------------------|-------------------|------------------------------|-------------------------------|-------------------|----------------------------------------|------------------|
| <b>7aa</b> | LYS116, GLU140                          | -                         | -                    | -                 | -                            | PHE133                        | -                 | LEU122                                 | -                |
| <b>7ab</b> | -                                       | -                         | -                    | -                 | -                            | -                             | LEU397, GLU540    | LYS396<br>ALA405,<br>VAL408,<br>LYS544 | -                |
| <b>7ac</b> | GLU540                                  | -                         | -                    | -                 | -                            | -                             | LEU397            | LYS396<br>ALA405,<br>VAL408,<br>LYS544 | -                |
| <b>7ae</b> | ARG217,<br>LYS221,<br>LYS294,<br>PRO446 | -                         | -                    | -                 | -                            | -                             | -                 | ALA341                                 | -                |
| <b>7af</b> | SER109,<br>LEU112,<br>ARG144            | -                         | -                    | GLU424,<br>ARG458 | ARG185,<br>GLU424,<br>ARG458 | -                             | -                 | LYS114,<br>LEU115                      | -                |
| <b>7ag</b> | THR52                                   | -                         | GLU45,<br>PHE49      | -                 | ASP72,<br>GLU73              | -                             | -                 | LEU46                                  | -                |
| <b>7ah</b> | PRO420                                  | -                         | ASP111               | -                 | GLU424                       | -                             | ILE522            | LYS114,<br>VAL423,<br>LEU462           | -                |
| <b>7ba</b> | GLU45,<br>THR52,<br>LYS64               | -                         | GLY61                | GLU73             | ASP72,<br>GLU73,<br>LYS76    | PHE49                         | -                 | -                                      | -                |
| <b>7ca</b> | -                                       | -                         | GLU16                | LYS20             | -                            | -                             | VAL40             | LEU24,<br>VAL43,<br>LYS131             | -                |
| <b>7da</b> | SER428                                  | -                         | -                    | GLU424,<br>LYS431 | GLU424,<br>ARG427            | -                             | -                 | LEU189,<br>ILE522                      | VAL423           |
| <b>7fa</b> | ARG458                                  | -                         | -                    | LYS431            | -                            | -                             | LEU189,<br>ALA193 | ARG196                                 | -                |

|            | Conventional<br>Hydrogen<br>Bonding | Pi-Donor<br>Hydrogen<br>Bonding | Carbon<br>Hydrogen<br>Bond   | Pi-cation | Pi-anion                     | Pi-Pi T-<br>shaped/ Pi-<br>Pi stacked | Pi-<br>Sigma      | Alkyl/<br>Pi-Alkyl                            | Amide-Pi<br>Stacked |
|------------|-------------------------------------|---------------------------------|------------------------------|-----------|------------------------------|---------------------------------------|-------------------|-----------------------------------------------|---------------------|
| <b>7fb</b> | LYS131                              | -                               | -                            | LYS20     | -                            | -                                     | VAL40             | LEU24,<br>LYS132                              | -                   |
| <b>7ai</b> | -                                   | PHE133                          | -                            | -         | GLU125                       | TYR137                                | LEU115            | PRO117,<br>LEU122,<br>LYS136                  | -                   |
| <b>7fi</b> | -                                   | -                               | -                            | -         | ASP72,<br>GLU73              | PHE49                                 | -                 | LEU46,<br>PHE49,<br>HIS59,<br>LYS64,<br>LEU69 | -                   |
| <b>7aj</b> | -                                   | -                               | -                            | LYS116    | GLU125                       | TYR160                                | LEU115            | PRO117,<br>LEU122,<br>LYS136                  | -                   |
| <b>7cj</b> | SER109,<br>LEU112                   | -                               | PRO110,<br>GLU519            | GLU424    | HIS145,<br>GLU424,<br>ARG458 | -                                     | ARG144            | LYS114,<br>LEU115,<br>LEU189,<br>ILE522       | -                   |
| <b>7dj</b> | -                                   | -                               | -                            | -         | GLU45,<br>ASP72,<br>GLU73    | PHE49                                 | -                 | LEU46                                         |                     |
| <b>7fj</b> | -                                   | -                               | -                            | -         | GLU45,<br>ASP72,<br>GLU73    | PHE49                                 | -                 | LEU46,<br>LEU69                               | -                   |
| <b>7gk</b> | -                                   | GLU339                          | TYR340                       | -         | -                            | TYR340                                | VAL380,<br>SER442 | MET445,<br>PRO446                             | -                   |
| <b>7ck</b> | -                                   | GLU339                          | TYR340,<br>GLN384,<br>SER442 | -         | -                            | -                                     | VAL380            | MET445,<br>PRO446                             | -                   |

**Table S9** The interacting nucleobases of DNA with derivatives **7** as determined from Autodock Vina

|            | <b>Conventional Hydrogen Bonding</b> | <b>Van der Waals</b>                 | <b>Pi-Donor Hydrogen Bonding</b> | <b>Carbon Hydrogen Bond</b> | <b>Pi-Pi T-shaped/<br/>Pi-Pi stacked</b> | <b>Pi-Sigma</b> | <b>Alkyl/<br/>Pi-Alkyl</b> |
|------------|--------------------------------------|--------------------------------------|----------------------------------|-----------------------------|------------------------------------------|-----------------|----------------------------|
| <b>7aa</b> | Gua4, Cyt23                          | Gua2, Cyt3, Ade5, Ade6, Gua22, Gua24 | -                                | -                           | -                                        | -               | -                          |
| <b>7ab</b> | Gua4, Gua22, Cyt23, Gua24            | Gua2, Cyt3, Ade5, Ade6               | Gua4, Gua22                      | -                           | -                                        | -               | -                          |
| <b>7ac</b> | Gua4, Gua22, Cyt23, Gua24            | Gua2, Cyt3, Ade5, Ade6               | Gua4, Gua22                      | -                           | -                                        | -               | -                          |
| <b>7ae</b> | Gua4, Gua22, Cyt23, Gua24            | Gua2, Cyt3, Ade5, Ade6               | Gua4, Gua22                      | -                           | -                                        | -               | -                          |
| <b>7af</b> | Gua4, Gua22, Cyt23, Gua24            | Gua2, Cyt3, Ade5, Ade6               | Gua22                            | -                           | -                                        | -               | -                          |
| <b>7ag</b> | Ade5, Ade6, Cyt23                    | Thy7                                 | Gua4, Gua22                      | Cyt21, Thy20,               | -                                        | -               | Ade5, Ade6                 |
| <b>7ah</b> | Gua4, Cyt23                          | Gua2, Cyt3, Ade5, Ade6               | Gua22                            | -                           | -                                        | -               | -                          |
| <b>7ba</b> | Gua4, Ade5, Ade6, Cyt23              | Thy7, Thy20, Cyt21                   | -                                | Ade5, Gau22                 | -                                        | -               | -                          |
| <b>7ca</b> | Gua4, Gua22, Cyt23, Gua24            | Gua2, Cyt3, Ade5                     | -                                | Gua2, Cyt3, Ade6            | -                                        | -               | -                          |
| <b>7da</b> | Gua4, Gua24                          | Gau2, Cyt3, Ade5, Gua22, Cyt23       | -                                | -                           | -                                        | -               | -                          |

|            | Conventional Hydrogen Bonding      | Van der Waals                                     | Pi-Donor Hydrogen Bonding | Carbon Hydrogen Bond     | Pi-Pi T-shaped/<br>Pi-Pi stacked | Pi-Sigma | Alkyl/<br>Pi-Alkyl |
|------------|------------------------------------|---------------------------------------------------|---------------------------|--------------------------|----------------------------------|----------|--------------------|
| <b>7fa</b> | Gua2, Cyt3                         | Cyt1, Gua4                                        | Cyt3, Cyt21               | Thy20,<br>Gua22          | Gua2                             | Thy20    | Cyt21, Gua22       |
| <b>7fb</b> | Gua2, Cyt4                         | Cyt1, Gua4                                        | Cyt3                      | Thy20,<br>Gua22          | Gua2,<br>Thy20,<br>Cyt21         | -        | Cyt21, Gua22       |
| <b>7ai</b> | Cyt3, Gua4, Gua22                  | Gua2, Ade5, Ade6,<br>Cyt21, Gua24                 | -                         | Cyt23                    | -                                | -        | -                  |
| <b>7fi</b> | -                                  | Gua4, Thy7,<br>Gua22, Cyt23                       | -                         | Ade6,<br>Thy20,<br>Cyt21 | -                                | -        | Ade5               |
| <b>7aj</b> | Gua4, Ade5, Ade6, Cyt23            | -                                                 | Gua22                     | Gua22                    | Gua4                             | -        | -                  |
| <b>7cj</b> | Gua4, Gua22                        | Gua2, Ade5,<br>Cyt23                              | -                         | Cyt3, Ade5               | -                                | -        | -                  |
| <b>7dj</b> | Ade4, Ade5                         | Cyt3, Ade6, Gua22,<br>Cyt23, Gua24                | -                         | -                        | -                                | -        | -                  |
| <b>7fj</b> | -                                  | Cyt3, Ade5, Gua4,<br>Gua24                        | Gua22                     | Ade6, Cyt23              | -                                | -        | -                  |
| <b>7gk</b> | Gua4                               | Gua2, Cyt3, Ade5,<br>Ade6, Cyt21, Gua22,<br>Gua24 | -                         | Cyt23                    | -                                | -        | -                  |
| <b>7ck</b> | Ade5, Ade6, Gua16,<br>Ade17, Ade18 | Thy7, Thy19                                       | Ade18                     | Thy8                     | -                                | -        | Gua4, Gua16        |

**Table S10** Cartesian Coordinates of the optimized structures obtained at B3LYP 631-G (d,p) level of theory

| Code | Cartesian Coordinates |               |           |                         |           |           |
|------|-----------------------|---------------|-----------|-------------------------|-----------|-----------|
|      | Center number         | Atomic number | Atom type | Coordinates (Angstroms) |           |           |
|      |                       |               |           | X                       | Y         | Z         |
|      | 1                     | 6             | C         | -0.882828               | 2.632954  | 0.301305  |
| 7aa  | 2                     | 6             | C         | -0.301890               | 1.533980  | -0.352121 |
|      | 3                     | 6             | C         | -0.134179               | 1.577119  | -1.728968 |
|      | 4                     | 6             | C         | -0.553141               | 2.711697  | -2.438574 |
|      | 5                     | 6             | C         | -1.133810               | 3.790496  | -1.771076 |
|      | 6                     | 6             | C         | -1.306602               | 3.766712  | -0.381956 |
|      | 7                     | 6             | C         | -0.405949               | 1.153808  | 2.015767  |
|      | 8                     | 6             | C         | 0.049541                | 0.457712  | 0.682273  |
|      | 9                     | 1             | H         | 0.319295                | 0.745425  | -2.255662 |
|      | 10                    | 1             | H         | -0.425121               | 2.748025  | -3.515802 |
|      | 11                    | 1             | H         | -1.456255               | 4.663150  | -2.331280 |
|      | 12                    | 1             | H         | -1.755648               | 4.605354  | 0.141649  |
|      | 13                    | 1             | H         | -1.326216               | 2.999300  | 2.372261  |
|      | 14                    | 8             | O         | -0.303690               | 0.718660  | 3.145887  |
|      | 15                    | 6             | C         | 1.550039                | 0.207529  | 0.744913  |
|      | 16                    | 6             | C         | 2.408019                | 0.665980  | 1.715295  |
|      | 17                    | 6             | C         | 2.368484                | -0.491560 | -0.224774 |
|      | 18                    | 1             | H         | 2.185501                | 1.199347  | 2.626670  |
|      | 19                    | 1             | H         | 4.509812                | 0.511296  | 1.976924  |
|      | 20                    | 6             | C         | -0.742556               | -0.832155 | 0.535000  |
|      | 21                    | 6             | C         | -0.314452               | -2.052454 | 0.998561  |
|      | 22                    | 6             | C         | -2.091884               | -1.029723 | 0.043728  |
|      | 23                    | 1             | H         | 0.629795                | -2.312516 | 1.451459  |
|      | 24                    | 6             | C         | -2.398012               | -2.408431 | 0.231129  |
|      | 25                    | 1             | H         | -1.213279               | -3.974063 | 1.050794  |
|      | 26                    | 7             | N         | -0.946094               | 2.375558  | 1.675555  |
|      | 27                    | 7             | N         | -1.297081               | -2.999143 | 0.815092  |
|      | 28                    | 7             | N         | 3.705385                | 0.316400  | 1.404299  |
|      | 29                    | 6             | C         | 3.715627                | -0.397218 | 0.224380  |
|      | 30                    | 6             | C         | 2.110482                | -1.208844 | -1.408577 |
|      | 31                    | 6             | C         | 3.169442                | -1.777192 | -2.105012 |
|      | 32                    | 6             | C         | 4.495960                | -1.654802 | -1.645322 |
|      | 33                    | 6             | C         | 4.785339                | -0.967740 | -0.473099 |
|      | 34                    | 1             | H         | 2.972701                | -2.332050 | -3.017582 |
|      | 35                    | 1             | H         | 5.303253                | -2.109836 | -2.211350 |
|      | 36                    | 1             | H         | 5.805209                | -0.879039 | -0.109275 |
|      | 37                    | 6             | C         | -3.079435               | -0.205027 | -0.530300 |
|      | 38                    | 6             | C         | -4.300211               | -0.758258 | -0.894874 |
|      | 39                    | 6             | C         | -4.572333               | -2.127340 | -0.704155 |
|      | 40                    | 6             | C         | -3.623899               | -2.969906 | -0.138996 |
|      | 41                    | 1             | H         | -2.892912               | 0.849970  | -0.693051 |
|      | 42                    | 1             | H         | -5.061535               | -0.122922 | -1.337947 |
|      | 43                    | 1             | H         | -5.536230               | -2.529450 | -1.001662 |
|      | 44                    | 1             | H         | -3.827167               | -4.026161 | 0.014252  |
|      | 45                    | 1             | H         | 1.092329                | -1.338850 | -1.759398 |
|      | Center number         | Atomic number | Atom type | Coordinates (Angstroms) |           |           |
|      |                       |               |           | X                       | Y         | Z         |
|      | 1                     | 6             | C         | -0.922840               | 1.746385  | 1.748207  |
| 7ab  | 2                     | 6             | C         | -0.327514               | 1.141241  | 0.629301  |
|      | 3                     | 6             | C         | -0.205277               | 1.856623  | -0.552399 |
|      | 4                     | 6             | C         | -0.689533               | 3.170004  | -0.590031 |
|      | 5                     | 6             | C         | -1.284786               | 3.766252  | 0.519325  |
|      | 6                     | 6             | C         | -1.406229               | 3.048551  | 1.714443  |
|      | 7                     | 6             | C         | -0.336726               | -0.361389 | 2.499415  |
|      | 8                     | 6             | C         | 0.100018                | -0.286557 | 0.991291  |
|      | 9                     | 1             | H         | 0.256281                | 1.424144  | -1.430692 |
|      | 10                    | 1             | H         | -1.650557               | 4.784544  | 0.454120  |
|      | 11                    | 1             | H         | -1.866408               | 3.505014  | 2.585145  |
|      | 12                    | 1             | H         | -1.309315               | 1.023764  | 3.733567  |
|      | 13                    | 8             | O         | -0.183342               | -1.291793 | 3.264489  |
|      | 14                    | 6             | C         | 1.610820                | -0.453978 | 0.907291  |
|      | 15                    | 6             | C         | 2.481787                | -0.488114 | 1.969830  |
|      | 16                    | 6             | C         | 2.423420                | -0.536745 | -0.289335 |
|      | 17                    | 1             | H         | 2.269151                | -0.486982 | 3.027874  |

|     |               |               |           |                         |           |           |
|-----|---------------|---------------|-----------|-------------------------|-----------|-----------|
|     | 18            | 1             | H         | 4.595487                | -0.636436 | 2.100750  |
|     | 19            | 6             | C         | -0.645481               | -1.372144 | 0.231970  |
|     | 20            | 6             | C         | -0.146695               | -2.632549 | 0.007601  |
|     | 21            | 6             | C         | -2.008798               | -1.375377 | -0.259913 |
|     | 22            | 1             | H         | 0.828537                | -3.028405 | 0.245282  |
|     | 23            | 6             | C         | -2.250511               | -2.676980 | -0.785605 |
|     | 24            | 1             | H         | -0.965463               | -4.369357 | -0.894384 |
|     | 25            | 7             | N         | -0.930386               | 0.843771  | 2.815381  |
|     | 26            | 7             | N         | -1.099286               | -3.414812 | -0.604344 |
|     | 27            | 7             | N         | 3.780288                | -0.567820 | 1.514346  |
|     | 28            | 6             | C         | 3.779825                | -0.603301 | 0.135541  |
|     | 29            | 6             | C         | 2.155436                | -0.587344 | -1.670836 |
|     | 30            | 6             | C         | 3.213095                | -0.677600 | -2.566506 |
|     | 31            | 6             | C         | 4.548121                | -0.726668 | -2.118174 |
|     | 32            | 6             | C         | 4.848281                | -0.695011 | -0.762289 |
|     | 33            | 1             | H         | 3.008838                | -0.716724 | -3.632252 |
|     | 34            | 1             | H         | 5.354021                | -0.796648 | -2.842491 |
|     | 35            | 1             | H         | 5.875337                | -0.742173 | -0.411336 |
|     | 36            | 6             | C         | -3.055354               | -0.434103 | -0.316900 |
|     | 37            | 6             | C         | -4.269961               | -0.800210 | -0.882204 |
|     | 38            | 6             | C         | -4.477844               | -2.093300 | -1.401134 |
|     | 39            | 6             | C         | -3.470189               | -3.048055 | -1.359639 |
|     | 40            | 1             | H         | -2.920177               | 0.569161  | 0.070026  |
|     | 41            | 1             | H         | -5.076486               | -0.074393 | -0.927650 |
|     | 42            | 1             | H         | -5.438532               | -2.347548 | -1.838808 |
|     | 43            | 1             | H         | -3.623789               | -4.048196 | -1.755190 |
|     | 44            | 1             | H         | 1.132696                | -0.583184 | -2.032376 |
|     | 45            | 17            | Cl        | -0.543270               | 4.091294  | -2.084745 |
| 7ac | Center number | Atomic number | Atom type | Coordinates (Angstroms) |           |           |
|     |               |               |           | X                       | Y         | Z         |
|     | 1             | 6             | C         | -0.894491               | 2.318498  | 1.055804  |
|     | 2             | 6             | C         | -0.306531               | 1.418019  | 0.152040  |
|     | 3             | 6             | C         | -0.148216               | 1.786286  | -1.176245 |
|     | 4             | 6             | C         | -0.590783               | 3.052450  | -1.561848 |
|     | 5             | 6             | C         | -1.178211               | 3.945536  | -0.675196 |
|     | 6             | 6             | C         | -1.335579               | 3.577328  | 0.666592  |
|     | 7             | 6             | C         | -0.385631               | 0.473348  | 2.357000  |
|     | 8             | 6             | C         | 0.068044                | 0.128386  | 0.891498  |
|     | 9             | 1             | H         | 0.306659                | 1.133258  | -1.910176 |
|     | 10            | 1             | H         | -1.504365               | 4.915121  | -1.034277 |
|     | 11            | 1             | H         | -1.790091               | 4.261630  | 1.376048  |
|     | 12            | 1             | H         | -1.324142               | 2.163661  | 3.157237  |
|     | 13            | 8             | O         | -0.268216               | -0.223716 | 3.345314  |
|     | 14            | 6             | C         | 1.572721                | -0.102478 | 0.882500  |
|     | 15            | 6             | C         | 2.431534                | 0.116920  | 1.932627  |
|     | 16            | 6             | C         | 2.393585                | -0.523334 | -0.234603 |
|     | 17            | 1             | H         | 2.208141                | 0.403065  | 2.948904  |
|     | 18            | 1             | H         | 4.537429                | -0.058901 | 2.137703  |
|     | 19            | 6             | C         | -0.707208               | -1.097188 | 0.435416  |
|     | 20            | 6             | C         | -0.250734               | -2.386664 | 0.563335  |
|     | 21            | 6             | C         | -2.064821               | -1.189076 | -0.063561 |
|     | 22            | 1             | H         | 0.707586                | -2.735122 | 0.916145  |
|     | 23            | 6             | C         | -2.346786               | -2.575468 | -0.229304 |
|     | 24            | 1             | H         | -1.120959               | -4.274858 | 0.140118  |
|     | 25            | 7             | N         | -0.942604               | 1.733380  | 2.327761  |
|     | 26            | 7             | N         | -1.224014               | -3.273863 | 0.163092  |
|     | 27            | 7             | N         | 3.731039                | -0.120917 | 1.538552  |
|     | 28            | 6             | C         | 3.742752                | -0.518453 | 0.217950  |
|     | 29            | 6             | C         | 2.137373                | -0.928022 | -1.558753 |
|     | 30            | 6             | C         | 3.199696                | -1.284694 | -2.379394 |
|     | 31            | 6             | C         | 4.527846                | -1.255801 | -1.909348 |
|     | 32            | 6             | C         | 4.815830                | -0.877215 | -0.604199 |
|     | 33            | 1             | H         | 3.004399                | -1.597625 | -3.400720 |
|     | 34            | 1             | H         | 5.337701                | -1.539878 | -2.574543 |
|     | 35            | 1             | H         | 5.837177                | -0.862692 | -0.234166 |
|     | 36            | 6             | C         | -3.077149               | -0.264658 | -0.387826 |
|     | 37            | 6             | C         | -4.298228               | -0.729890 | -0.858496 |
|     | 38            | 6             | C         | -4.546146               | -2.107298 | -1.019629 |
|     | 39            | 6             | C         | -3.572996               | -3.047587 | -0.707234 |
|     | 40            | 1             | H         | -2.910322               | 0.800522  | -0.277685 |
|     | 41            | 1             | H         | -5.078663               | -0.017595 | -1.109512 |

|     |               |               |           |                         |           |           |
|-----|---------------|---------------|-----------|-------------------------|-----------|-----------|
|     | 42            | 1             | H         | -5.510851               | -2.438745 | -1.392003 |
|     | 43            | 1             | H         | -3.757717               | -4.111628 | -0.825877 |
|     | 44            | 1             | H         | 1.118749                | -0.987201 | -1.927079 |
|     | 45            | 9             | F         | -0.442351               | 3.421428  | -2.854801 |
| 7ad | Center number | Atomic number | Atom type | Coordinates (Angstroms) |           |           |
|     |               |               |           | X                       | Y         | Z         |
|     | 1             | 6             | C         | 1.225834                | -0.089842 | 2.232728  |
|     | 2             | 6             | C         | 0.587160                | -0.244304 | 0.991248  |
|     | 3             | 6             | C         | 1.167033                | -1.044922 | 0.018632  |
|     | 4             | 6             | C         | 2.383216                | -1.673126 | 0.310282  |
|     | 5             | 6             | C         | 3.017627                | -1.514368 | 1.539382  |
|     | 6             | 6             | C         | 2.434213                | -0.710480 | 2.525269  |
|     | 7             | 6             | C         | -0.705905               | 1.165986  | 2.437822  |
|     | 8             | 6             | C         | -0.718417               | 0.560505  | 0.987445  |
|     | 9             | 1             | H         | 0.697725                | -1.193332 | -0.945024 |
|     | 10            | 1             | H         | 3.960028                | -2.013874 | 1.731345  |
|     | 11            | 1             | H         | 2.919177                | -0.581699 | 3.487871  |
|     | 12            | 1             | H         | 0.697749                | 1.030908  | 3.986981  |
|     | 13            | 8             | O         | -1.555661               | 1.865450  | 2.950707  |
|     | 14            | 6             | C         | -1.931764               | -0.347555 | 0.842952  |
|     | 15            | 6             | C         | -2.787061               | -0.722646 | 1.851161  |
|     | 16            | 6             | C         | -2.376383               | -1.041165 | -0.348761 |
|     | 17            | 1             | H         | -2.815422               | -0.396842 | 2.879615  |
|     | 18            | 1             | H         | -4.472999               | -2.011505 | 1.910230  |
|     | 19            | 6             | C         | -0.737309               | 1.713085  | -0.003407 |
|     | 20            | 6             | C         | -1.884535               | 2.246255  | -0.539422 |
|     | 21            | 6             | C         | 0.356452                | 2.547759  | -0.458997 |
|     | 22            | 1             | H         | -2.905081               | 1.916015  | -0.422447 |
|     | 23            | 6             | C         | -0.216195               | 3.556813  | -1.285292 |
|     | 24            | 1             | H         | -2.245915               | 3.891673  | -1.828815 |
|     | 25            | 7             | N         | 0.460289                | 0.748840  | 3.047230  |
|     | 26            | 7             | N         | -1.578945               | 3.344863  | -1.309839 |
|     | 27            | 7             | N         | -3.720971               | -1.615518 | 1.370997  |
|     | 28            | 6             | C         | -3.500078               | -1.829394 | 0.026421  |
|     | 29            | 6             | C         | -1.966415               | -1.065136 | -1.695699 |
|     | 30            | 6             | C         | -2.650816               | -1.865400 | -2.601317 |
|     | 31            | 6             | C         | -3.751522               | -2.647816 | -2.198808 |
|     | 32            | 6             | C         | -4.192985               | -2.636317 | -0.881805 |
|     | 33            | 1             | H         | -2.336393               | -1.885534 | -3.640452 |
|     | 34            | 1             | H         | -4.266331               | -3.264041 | -2.929729 |
|     | 35            | 1             | H         | -5.046865               | -3.230451 | -0.568546 |
|     | 36            | 6             | C         | 1.751735                | 2.564135  | -0.265564 |
|     | 37            | 6             | C         | 2.513076                | 3.547272  | -0.884180 |
|     | 38            | 6             | C         | 1.919725                | 4.528645  | -1.702363 |
|     | 39            | 6             | C         | 0.547208                | 4.545432  | -1.913520 |
|     | 40            | 1             | H         | 2.234266                | 1.817354  | 0.354153  |
|     | 41            | 1             | H         | 3.588912                | 3.559280  | -0.736586 |
|     | 42            | 1             | H         | 2.543148                | 5.282422  | -2.173839 |
|     | 43            | 1             | H         | 0.081964                | 5.300623  | -2.540872 |
|     | 44            | 1             | H         | -1.141260               | -0.445265 | -2.029753 |
|     | 45            | 35            | Br        | 3.197903                | -2.780204 | -1.022964 |
| 7ae | Center number | Atomic number | Atom type | Coordinates (Angstroms) |           |           |
|     |               |               |           | X                       | Y         | Z         |
|     | 1             | 6             | C         | -0.963116               | 1.365545  | 1.978070  |
|     | 2             | 6             | C         | -0.357783               | 0.910132  | 0.789964  |
|     | 3             | 6             | C         | -0.291214               | 1.753122  | -0.303196 |
|     | 4             | 6             | C         | -0.836054               | 3.038812  | -0.180190 |
|     | 5             | 6             | C         | -1.436168               | 3.490266  | 0.995026  |
|     | 6             | 6             | C         | -1.504780               | 2.644282  | 2.100001  |
|     | 7             | 6             | C         | -0.289295               | -0.788665 | 2.477487  |
|     | 8             | 6             | C         | 0.139746                | -0.526635 | 0.991065  |
|     | 9             | 1             | H         | 0.165220                | 1.460849  | -1.238543 |
|     | 10            | 1             | H         | -1.839766               | 4.494065  | 1.026781  |
|     | 11            | 1             | H         | -1.967983               | 2.975439  | 3.023625  |
|     | 12            | 1             | H         | -1.303166               | 0.418797  | 3.866690  |
|     | 13            | 8             | O         | -0.107400               | -1.789382 | 3.136522  |
|     | 14            | 6             | C         | 1.658512                | -0.602315 | 0.901606  |
|     | 15            | 6             | C         | 2.526430                | -0.731410 | 1.959926  |
|     | 16            | 6             | C         | 2.477919                | -0.483375 | -0.287603 |
|     | 17            | 1             | H         | 2.311772                | -0.880156 | 3.007085  |
|     | 18            | 1             | H         | 4.643801                | -0.786205 | 2.091591  |

|     |               |               |           |                         |           |           |
|-----|---------------|---------------|-----------|-------------------------|-----------|-----------|
|     | 19            | 6             | C         | -0.548432               | -1.552698 | 0.106884  |
|     | 20            | 6             | C         | 0.029880                | -2.728540 | -0.306467 |
|     | 21            | 6             | C         | -1.923786               | -1.587068 | -0.348262 |
|     | 22            | 1             | H         | 1.038343                | -3.080017 | -0.152777 |
|     | 23            | 6             | C         | -2.091511               | -2.815861 | -1.048080 |
|     | 24            | 1             | H         | -0.694447               | -4.374816 | -1.430114 |
|     | 25            | 7             | N         | -0.921880               | 0.358637  | 2.933350  |
|     | 26            | 7             | N         | -0.885903               | -3.484758 | -1.000563 |
|     | 27            | 7             | N         | 3.827880                | -0.684115 | 1.510966  |
|     | 28            | 6             | C         | 3.833990                | -0.536220 | 0.139315  |
|     | 29            | 6             | C         | 2.218138                | -0.362832 | -1.666457 |
|     | 30            | 6             | C         | 3.282611                | -0.278033 | -2.554154 |
|     | 31            | 6             | C         | 4.616541                | -0.318202 | -2.101748 |
|     | 32            | 6             | C         | 4.909546                | -0.452749 | -0.750809 |
|     | 33            | 1             | H         | 3.084520                | -0.182194 | -3.617267 |
|     | 34            | 1             | H         | 5.427625                | -0.248521 | -2.820164 |
|     | 35            | 1             | H         | 5.936145                | -0.493524 | -0.397932 |
|     | 36            | 6             | C         | -3.034577               | -0.727089 | -0.245367 |
|     | 37            | 6             | C         | -4.239302               | -1.098324 | -0.827998 |
|     | 38            | 6             | C         | -4.373584               | -2.317411 | -1.520972 |
|     | 39            | 6             | C         | -3.301082               | -3.191547 | -1.639987 |
|     | 40            | 1             | H         | -2.957808               | 0.219798  | 0.276766  |
|     | 41            | 1             | H         | -5.095491               | -0.434879 | -0.750813 |
|     | 42            | 1             | H         | -5.328273               | -2.577510 | -1.967964 |
|     | 43            | 1             | H         | -3.398000               | -4.134389 | -2.170819 |
|     | 44            | 1             | H         | 1.198829                | -0.361588 | -2.037137 |
|     | 45            | 7             | N         | -0.777472               | 3.942143  | -1.331197 |
|     | 46            | 8             | O         | -1.254690               | 5.072012  | -1.201911 |
|     | 47            | 8             | O         | -0.254843               | 3.522670  | -2.365264 |
| 7af | Center number | Atomic number | Atom type | Coordinates (Angstroms) |           |           |
|     |               |               |           | X                       | Y         | Z         |
|     | 1             | 6             | C         | -0.909287               | 2.271310  | 1.165086  |
|     | 2             | 6             | C         | -0.318427               | 1.412383  | 0.224111  |
|     | 3             | 6             | C         | -0.175683               | 1.837519  | -1.086615 |
|     | 4             | 6             | C         | -0.623205               | 3.115925  | -1.474105 |
|     | 5             | 6             | C         | -1.211625               | 3.942521  | -0.512021 |
|     | 6             | 6             | C         | -1.363124               | 3.536053  | 0.820167  |
|     | 7             | 6             | C         | -0.373630               | 0.385285  | 2.394037  |
|     | 8             | 6             | C         | 0.071683                | 0.098822  | 0.913479  |
|     | 9             | 1             | H         | 0.286066                | 1.189331  | -1.824062 |
|     | 10            | 1             | H         | -1.560779               | 4.929707  | -0.802915 |
|     | 11            | 1             | H         | -1.820228               | 4.193099  | 1.554033  |
|     | 12            | 1             | H         | -1.322023               | 2.035313  | 3.262299  |
|     | 13            | 8             | O         | -0.241787               | -0.345910 | 3.356227  |
|     | 14            | 6             | C         | 1.577319                | -0.125348 | 0.887057  |
|     | 15            | 6             | C         | 2.442636                | 0.064858  | 1.937255  |
|     | 16            | 6             | C         | 2.392676                | -0.509255 | -0.247346 |
|     | 17            | 1             | H         | 2.225112                | 0.318838  | 2.963297  |
|     | 18            | 1             | H         | 4.550940                | -0.109891 | 2.123446  |
|     | 19            | 6             | C         | -0.699269               | -1.116177 | 0.421454  |
|     | 20            | 6             | C         | -0.240987               | -2.407563 | 0.519042  |
|     | 21            | 6             | C         | -2.053549               | -1.198610 | -0.088618 |
|     | 22            | 1             | H         | 0.715760                | -2.762863 | 0.869382  |
|     | 23            | 6             | C         | -2.331376               | -2.581112 | -0.291624 |
|     | 24            | 1             | H         | -1.104431               | -4.286785 | 0.042742  |
|     | 25            | 7             | N         | -0.943426               | 1.639362  | 2.414522  |
|     | 26            | 7             | N         | -1.209625               | -3.286903 | 0.089704  |
|     | 27            | 7             | N         | 3.741111                | -0.155064 | 1.527525  |
|     | 28            | 6             | C         | 3.745148                | -0.513047 | 0.195902  |
|     | 29            | 6             | C         | 2.128886                | -0.875439 | -1.581074 |
|     | 30            | 6             | C         | 3.186657                | -1.204485 | -2.419150 |
|     | 31            | 6             | C         | 4.518014                | -1.184880 | -1.957663 |
|     | 32            | 6             | C         | 4.813681                | -0.843510 | -0.643907 |
|     | 33            | 1             | H         | 2.985304                | -1.488861 | -3.447737 |
|     | 34            | 1             | H         | 5.324248                | -1.447045 | -2.636232 |
|     | 35            | 1             | H         | 5.837549                | -0.836473 | -0.280532 |
|     | 36            | 6             | C         | -3.066223               | -0.268400 | -0.395364 |
|     | 37            | 6             | C         | -4.283348               | -0.724490 | -0.885197 |
|     | 38            | 6             | C         | -4.527129               | -2.097856 | -1.083313 |
|     | 39            | 6             | C         | -3.553515               | -3.043607 | -0.789167 |
|     | 40            | 1             | H         | -2.901780               | 0.793673  | -0.256490 |

|     |               |               |           |                         |           |           |
|-----|---------------|---------------|-----------|-------------------------|-----------|-----------|
|     | 41            | 1             | H         | -5.064331               | -0.007756 | -1.121833 |
|     | 42            | 1             | H         | -5.488942               | -2.421952 | -1.469584 |
|     | 43            | 1             | H         | -3.734967               | -4.104762 | -0.935898 |
|     | 44            | 1             | H         | 1.107728                | -0.925607 | -1.943437 |
|     | 45            | 6             | C         | -0.468995               | 3.571104  | -2.906932 |
|     | 46            | 1             | H         | 0.579566                | 3.545265  | -3.224998 |
|     | 47            | 1             | H         | -1.028503               | 2.926618  | -3.595093 |
|     | 48            | 1             | H         | -0.832378               | 4.593671  | -3.041418 |
| 7ag | Center number | Atomic number | Atom type | Coordinates (Angstroms) |           |           |
|     |               |               |           | X                       | Y         | Z         |
|     | 1             | 6             | C         | -1.069557               | 1.581118  | 1.760394  |
|     | 2             | 6             | C         | -0.417560               | 1.059378  | 0.628697  |
|     | 3             | 6             | C         | -0.388145               | 1.793421  | -0.541701 |
|     | 4             | 6             | C         | -1.016144               | 3.053459  | -0.584153 |
|     | 5             | 6             | C         | -1.665942               | 3.559196  | 0.545114  |
|     | 6             | 6             | C         | -1.694212               | 2.816369  | 1.736497  |
|     | 7             | 6             | C         | -0.243601               | -0.456953 | 2.483933  |
|     | 8             | 6             | C         | 0.167358                | -0.316714 | 0.971834  |
|     | 9             | 1             | H         | 0.108057                | 1.435223  | -1.435083 |
|     | 10            | 1             | H         | -2.153183               | 4.526045  | 0.519896  |
|     | 11            | 1             | H         | -2.197842               | 3.212367  | 2.613169  |
|     | 12            | 1             | H         | -1.351082               | 0.790681  | 3.742552  |
|     | 13            | 8             | O         | 0.023774                | -1.375634 | 3.234643  |
|     | 14            | 6             | C         | 1.686414                | -0.323211 | 0.872332  |
|     | 15            | 6             | C         | 2.566190                | -0.287613 | 1.927157  |
|     | 16            | 6             | C         | 2.492826                | -0.302826 | -0.331238 |
|     | 17            | 1             | H         | 2.363330                | -0.327917 | 2.986284  |
|     | 18            | 1             | H         | 4.685786                | -0.223804 | 2.040143  |
|     | 19            | 6             | C         | -0.464545               | -1.469026 | 0.207268  |
|     | 20            | 6             | C         | 0.163329                | -2.666342 | -0.035991 |
|     | 21            | 6             | C         | -1.824502               | -1.613662 | -0.272497 |
|     | 22            | 1             | H         | 1.177576                | -2.958091 | 0.188613  |
|     | 23            | 6             | C         | -1.931643               | -2.928402 | -0.810403 |
|     | 24            | 1             | H         | -0.474431               | -4.472280 | -0.950144 |
|     | 25            | 7             | N         | -0.963916               | 0.666539  | 2.818850  |
|     | 26            | 7             | N         | -0.706581               | -3.540642 | -0.648220 |
|     | 27            | 7             | N         | 3.862664                | -0.226202 | 1.460999  |
|     | 28            | 6             | C         | 3.853174                | -0.238835 | 0.082026  |
|     | 29            | 6             | C         | 2.218758                | -0.357214 | -1.711201 |
|     | 30            | 6             | C         | 3.271790                | -0.326341 | -2.616446 |
|     | 31            | 6             | C         | 4.609156                | -0.247860 | -2.179418 |
|     | 32            | 6             | C         | 4.917037                | -0.207504 | -0.825368 |
|     | 33            | 1             | H         | 3.062486                | -0.368550 | -3.681191 |
|     | 34            | 1             | H         | 5.411391                | -0.224949 | -2.910936 |
|     | 35            | 1             | H         | 5.946900                | -0.156514 | -0.483003 |
|     | 36            | 6             | C         | -2.965896               | -0.788840 | -0.308781 |
|     | 37            | 6             | C         | -4.140695               | -1.277121 | -0.866179 |
|     | 38            | 6             | C         | -4.215284               | -2.579713 | -1.397621 |
|     | 39            | 6             | C         | -3.110981               | -3.421740 | -1.376768 |
|     | 40            | 1             | H         | -2.932531               | 0.218978  | 0.088263  |
|     | 41            | 1             | H         | -5.020946               | -0.641528 | -0.894941 |
|     | 42            | 1             | H         | -5.148242               | -2.930947 | -1.828401 |
|     | 43            | 1             | H         | -3.161376               | -4.428656 | -1.781845 |
|     | 44            | 1             | H         | 1.197129                | -0.447402 | -2.064174 |
|     | 45            | 8             | O         | -0.932700               | 3.702008  | -1.787384 |
|     | 46            | 6             | C         | -1.545244               | 4.973751  | -1.904394 |
|     | 47            | 1             | H         | -1.361502               | 5.305089  | -2.927575 |
|     | 48            | 1             | H         | -2.628651               | 4.921327  | -1.732620 |
|     | 49            | 1             | H         | -1.109110               | 5.701439  | -1.207039 |
| 7ah | Center number | Atomic number | Atom type | Coordinates (Angstroms) |           |           |
|     |               |               |           | X                       | Y         | Z         |
|     | 1             | 6             | C         | 1.667613                | -1.658748 | 0.155133  |
|     | 2             | 6             | C         | 0.639247                | -0.916497 | -0.448900 |
|     | 3             | 6             | C         | 0.469795                | -0.973235 | -1.824287 |
|     | 4             | 6             | C         | 1.333244                | -1.769129 | -2.590333 |
|     | 5             | 6             | C         | 2.355155                | -2.502571 | -1.988413 |
|     | 6             | 6             | C         | 2.523142                | -2.448527 | -0.602634 |
|     | 7             | 6             | C         | 0.634214                | -0.624623 | 1.936565  |
|     | 8             | 6             | C         | -0.131084               | -0.162878 | 0.643406  |
|     | 9             | 1             | H         | -0.322709               | -0.413621 | -2.306318 |
|     | 10            | 1             | H         | 1.208885                | -1.817624 | -3.667176 |

|     |               |               |           |                         |           |           |
|-----|---------------|---------------|-----------|-------------------------|-----------|-----------|
|     | 11            | 1             | H         | 3.022996                | -3.117927 | -2.580876 |
|     | 12            | 1             | H         | 2.307282                | -1.880765 | 2.181211  |
|     | 13            | 8             | O         | 0.385041                | -0.323477 | 3.085580  |
|     | 14            | 6             | C         | -1.574186               | -0.640595 | 0.731135  |
|     | 15            | 6             | C         | -2.090508               | -1.486751 | 1.683050  |
|     | 16            | 6             | C         | -2.652459               | -0.362727 | -0.195635 |
|     | 17            | 1             | H         | -1.618064               | -1.894729 | 2.563445  |
|     | 18            | 1             | H         | -4.013658               | -2.339429 | 1.967761  |
|     | 19            | 6             | C         | -0.028516               | 1.350650  | 0.548920  |
|     | 20            | 6             | C         | -0.960395               | 2.215942  | 1.069184  |
|     | 21            | 6             | C         | 1.063834                | 2.167799  | 0.059475  |
|     | 22            | 1             | H         | -1.905844               | 1.992393  | 1.538738  |
|     | 23            | 6             | C         | 0.702568                | 3.523433  | 0.306285  |
|     | 24            | 1             | H         | -1.048941               | 4.331257  | 1.204641  |
|     | 25            | 7             | N         | 1.656361                | -1.461482 | 1.533014  |
|     | 26            | 7             | N         | -0.531497               | 3.515323  | 0.922358  |
|     | 27            | 7             | N         | -3.410166               | -1.767442 | 1.400486  |
|     | 28            | 6             | C         | -3.786869               | -1.092013 | 0.258609  |
|     | 29            | 6             | C         | -2.793390               | 0.440193  | -1.343728 |
|     | 30            | 6             | C         | -4.015874               | 0.478140  | -2.002039 |
|     | 31            | 6             | C         | -5.118865               | -0.266466 | -1.538527 |
|     | 32            | 6             | C         | -5.019984               | -1.056832 | -0.400465 |
|     | 33            | 1             | H         | -4.127615               | 1.097911  | -2.886727 |
|     | 34            | 1             | H         | -6.062004               | -0.216620 | -2.074305 |
|     | 35            | 1             | H         | -5.870186               | -1.624967 | -0.033567 |
|     | 36            | 6             | C         | 2.305796                | 1.915788  | -0.555876 |
|     | 37            | 6             | C         | 3.122868                | 2.984059  | -0.902450 |
|     | 38            | 6             | C         | 2.735672                | 4.315402  | -0.652884 |
|     | 39            | 6             | C         | 1.520035                | 4.601803  | -0.045541 |
|     | 40            | 1             | H         | 2.625597                | 0.901436  | -0.763738 |
|     | 41            | 1             | H         | 4.080523                | 2.790002  | -1.376379 |
|     | 42            | 1             | H         | 3.396659                | 5.128583  | -0.937457 |
|     | 43            | 1             | H         | 1.215932                | 5.625667  | 0.153402  |
|     | 44            | 1             | H         | -1.963976               | 1.044504  | -1.695281 |
|     | 45            | 17            | Cl        | 3.799153                | -3.365456 | 0.190392  |
| 7ba | Center number | Atomic number | Atom type | Coordinates (Angstroms) |           |           |
|     |               |               |           | X                       | Y         | Z         |
|     | 1             | 6             | C         | -1.155520               | -2.646570 | 0.431467  |
|     | 2             | 6             | C         | -0.387131               | -1.492776 | 0.653740  |
|     | 3             | 6             | C         | -0.199313               | -1.043086 | 1.953606  |
|     | 4             | 6             | C         | -0.784504               | -1.746587 | 3.015462  |
|     | 5             | 6             | C         | -1.549860               | -2.887785 | 2.772442  |
|     | 6             | 6             | C         | -1.746284               | -3.358028 | 1.468773  |
|     | 7             | 6             | C         | -0.490283               | -2.009458 | -1.690860 |
|     | 8             | 6             | C         | 0.102912                | -0.947184 | -0.692669 |
|     | 9             | 1             | H         | 0.391119                | -0.156430 | 2.154756  |
|     | 10            | 1             | H         | -0.644426               | -1.395926 | 4.032708  |
|     | 11            | 1             | H         | -2.003394               | -3.420666 | 3.602413  |
|     | 12            | 1             | H         | -2.342539               | -4.244679 | 1.276808  |
|     | 13            | 1             | H         | -1.705900               | -3.680722 | -1.371809 |
|     | 14            | 8             | O         | -0.340738               | -2.041393 | -2.896406 |
|     | 15            | 6             | C         | 1.620595                | -0.969551 | -0.799094 |
|     | 16            | 6             | C         | 2.370636                | -1.879743 | -1.502125 |
|     | 17            | 6             | C         | 2.566395                | -0.092464 | -0.139794 |
|     | 18            | 1             | H         | 2.043754                | -2.674840 | -2.154300 |
|     | 19            | 1             | H         | 4.464073                | -2.160657 | -1.735638 |
|     | 20            | 6             | C         | -0.477460               | 0.409148  | -1.060597 |
|     | 21            | 6             | C         | 0.112514                | 1.295820  | -1.927156 |
|     | 22            | 6             | C         | -1.768917               | 0.972459  | -0.720342 |
|     | 23            | 1             | H         | 1.070405                | 1.229620  | -2.419452 |
|     | 24            | 6             | C         | -1.871709               | 2.215538  | -1.412356 |
|     | 25            | 1             | H         | -0.491169               | 3.176639  | -2.707364 |
|     | 26            | 7             | N         | -1.210103               | -2.912639 | -0.943152 |
|     | 27            | 7             | N         | -0.714890               | 2.378508  | -2.135272 |
|     | 28            | 7             | N         | 3.716288                | -1.638827 | -1.308143 |
|     | 29            | 6             | C         | 3.871557                | -0.551508 | -0.483543 |
|     | 30            | 6             | C         | 2.451904                | 1.042306  | 0.674984  |
|     | 31            | 6             | C         | 3.614036                | 1.669215  | 1.137743  |
|     | 32            | 6             | C         | 4.900377                | 1.179603  | 0.793527  |
|     | 33            | 6             | C         | 5.037897                | 0.069483  | -0.021793 |
|     | 34            | 1             | H         | 5.777675                | 1.691298  | 1.172899  |

|     |                      |                      |                  |                                |           |           |
|-----|----------------------|----------------------|------------------|--------------------------------|-----------|-----------|
|     | 35                   | 1                    | H                | 6.020662                       | -0.302313 | -0.294909 |
|     | 36                   | 6                    | C                | -2.846349                      | 0.567832  | 0.081459  |
|     | 37                   | 6                    | C                | -3.971198                      | 1.393984  | 0.176673  |
|     | 38                   | 6                    | C                | -4.040979                      | 2.629841  | -0.516024 |
|     | 39                   | 6                    | C                | -2.991368                      | 3.049314  | -1.314152 |
|     | 40                   | 1                    | H                | -2.822907                      | -0.365193 | 0.629624  |
|     | 41                   | 1                    | H                | -4.929199                      | 3.242969  | -0.413270 |
|     | 42                   | 1                    | H                | -3.039607                      | 3.993093  | -1.848502 |
|     | 43                   | 1                    | H                | 1.482132                       | 1.452333  | 0.930584  |
|     | 44                   | 6                    | C                | 3.507347                       | 2.834227  | 1.965822  |
|     | 45                   | 6                    | C                | -5.078284                      | 0.984347  | 0.989961  |
| 7ca | 46                   | 7                    | N                | 3.425120                       | 3.781356  | 2.637495  |
|     | 47                   | 7                    | N                | -5.977392                      | 0.651081  | 1.649897  |
|     | <b>Center number</b> | <b>Atomic number</b> | <b>Atom type</b> | <b>Coordinates (Angstroms)</b> |           |           |
|     |                      |                      |                  | <b>X</b>                       | <b>Y</b>  | <b>Z</b>  |
|     | 1                    | 6                    | C                | -1.397230                      | -2.562740 | 0.486402  |
|     | 2                    | 6                    | C                | -0.540229                      | -1.460785 | 0.642837  |
|     | 3                    | 6                    | C                | -0.283958                      | -0.979043 | 1.918752  |
|     | 4                    | 6                    | C                | -0.889110                      | -1.597285 | 3.022850  |
|     | 5                    | 6                    | C                | -1.741745                      | -2.687564 | 2.845601  |
|     | 6                    | 6                    | C                | -2.008654                      | -3.189785 | 1.565971  |
|     | 7                    | 6                    | C                | -0.740245                      | -2.055217 | -1.673638 |
|     | 8                    | 6                    | C                | -0.043038                      | -1.005759 | -0.734956 |
|     | 9                    | 1                    | H                | 0.378556                       | -0.134073 | 2.066196  |
|     | 10                   | 1                    | H                | -0.690763                      | -1.222771 | 4.022167  |
|     | 11                   | 1                    | H                | -2.204517                      | -3.158428 | 3.707967  |
|     | 12                   | 1                    | H                | -2.668741                      | -4.040303 | 1.423821  |
|     | 13                   | 1                    | H                | -2.065778                      | -3.621959 | -1.260002 |
|     | 14                   | 8                    | O                | -0.632742                      | -2.152069 | -2.880243 |
|     | 15                   | 6                    | C                | 1.466338                       | -1.156681 | -0.865725 |
|     | 16                   | 6                    | C                | 2.125063                       | -2.154057 | -1.545475 |
|     | 17                   | 6                    | C                | 2.491539                       | -0.337553 | -0.251021 |
|     | 18                   | 1                    | H                | 1.717618                       | -2.940501 | -2.162201 |
|     | 19                   | 1                    | H                | 4.179500                       | -2.612070 | -1.813920 |
|     | 20                   | 6                    | C                | -0.521498                      | 0.379486  | -1.141858 |
|     | 21                   | 6                    | C                | 0.122739                       | 1.174863  | -2.061746 |
|     | 22                   | 6                    | C                | -1.746382                      | 1.066806  | -0.790520 |
|     | 23                   | 1                    | H                | 1.059757                       | 1.001650  | -2.568022 |
|     | 24                   | 6                    | C                | -1.758528                      | 2.280354  | -1.527762 |
|     | 25                   | 1                    | H                | -0.331085                      | 3.068683  | -2.898655 |
|     | 26                   | 7                    | N                | -1.507743                      | -2.875166 | -0.872882 |
|     | 27                   | 7                    | N                | -0.609949                      | 2.313229  | -2.295198 |
|     | 28                   | 7                    | N                | 3.486104                       | -2.026470 | -1.379620 |
|     | 29                   | 6                    | C                | 3.745106                       | -0.917917 | -0.595109 |
|     | 30                   | 6                    | C                | 2.481744                       | 0.830161  | 0.527441  |
|     | 31                   | 6                    | C                | 3.690405                       | 1.375049  | 0.958542  |
|     | 32                   | 6                    | C                | 4.922327                       | 0.776091  | 0.617698  |
|     | 33                   | 6                    | C                | 4.954431                       | -0.374114 | -0.166525 |
|     | 34                   | 1                    | H                | 5.856378                       | 1.206849  | 0.956216  |
|     | 35                   | 1                    | H                | 5.904191                       | -0.828019 | -0.434877 |
|     | 36                   | 6                    | C                | -2.830826                      | 0.782137  | 0.068514  |
|     | 37                   | 6                    | C                | -3.865626                      | 1.705430  | 0.169074  |
|     | 38                   | 6                    | C                | -3.851392                      | 2.910677  | -0.571395 |
|     | 39                   | 6                    | C                | -2.801684                      | 3.206909  | -1.423341 |
|     | 40                   | 1                    | H                | -2.844732                      | -0.134143 | 0.641111  |
|     | 41                   | 1                    | H                | -4.685912                      | 3.592872  | -0.451071 |
|     | 42                   | 1                    | H                | -2.793899                      | 4.131967  | -1.992854 |
|     | 43                   | 1                    | H                | 1.560280                       | 1.339974  | 0.782506  |
|     | 44                   | 8                    | O                | -4.967881                      | 1.545928  | 0.972934  |
|     | 45                   | 8                    | O                | 3.584156                       | 2.517413  | 1.715354  |
|     | 46                   | 6                    | C                | 4.771887                       | 3.129124  | 2.181513  |
|     | 47                   | 6                    | C                | -5.047971                      | 0.370764  | 1.758506  |
|     | 48                   | 1                    | H                | 5.419192                       | 3.452700  | 1.355086  |
|     | 49                   | 1                    | H                | 4.457015                       | 4.006055  | 2.749937  |
|     | 50                   | 1                    | H                | 5.345452                       | 2.463593  | 2.840794  |
|     | 51                   | 1                    | H                | -4.203676                      | 0.286662  | 2.455344  |
|     | 52                   | 1                    | H                | -5.977372                      | 0.447749  | 2.325787  |
|     | 53                   | 1                    | H                | -5.079384                      | -0.533910 | 1.136455  |
| 7da | <b>Center number</b> | <b>Atomic number</b> | <b>Atom type</b> | <b>Coordinates (Angstroms)</b> |           |           |
|     |                      |                      |                  | <b>X</b>                       | <b>Y</b>  | <b>Z</b>  |
|     | 1                    | 6                    | C                | -0.976077                      | 2.722726  | 0.106684  |

|     |               |               |           |                         |           |           |
|-----|---------------|---------------|-----------|-------------------------|-----------|-----------|
|     | 2             | 6             | C         | -0.421361               | 1.596420  | -0.518739 |
|     | 3             | 6             | C         | -0.339708               | 1.554703  | -1.903179 |
|     | 4             | 6             | C         | -0.849863               | 2.625548  | -2.650796 |
|     | 5             | 6             | C         | -1.424100               | 3.725982  | -2.011579 |
|     | 6             | 6             | C         | -1.489535               | 3.794392  | -0.614393 |
|     | 7             | 6             | C         | -0.223851               | 1.412592  | 1.860695  |
|     | 8             | 6             | C         | 0.056076                | 0.605261  | 0.545898  |
|     | 9             | 1             | H         | 0.107908                | 0.700333  | -2.400065 |
|     | 10            | 1             | H         | -0.798418               | 2.596974  | -3.734651 |
|     | 11            | 1             | H         | -1.819120               | 4.547730  | -2.601523 |
|     | 12            | 1             | H         | -1.920995               | 4.656771  | -0.115163 |
|     | 13            | 1             | H         | -1.208301               | 3.230993  | 2.184907  |
|     | 14            | 8             | O         | 0.042732                | 1.094323  | 3.005955  |
|     | 15            | 6             | C         | 1.532936                | 0.286928  | 0.342044  |
|     | 16            | 6             | C         | 2.623254                | 0.963353  | 0.858479  |
|     | 17            | 6             | C         | 2.053852                | -0.724318 | -0.555249 |
|     | 18            | 1             | H         | 4.710596                | 0.705773  | 0.582169  |
|     | 19            | 6             | C         | -0.817097               | -0.653247 | 0.662229  |
|     | 20            | 6             | C         | -0.499463               | -1.745660 | 1.453169  |
|     | 21            | 6             | C         | -2.122737               | -0.916727 | 0.082105  |
|     | 22            | 6             | C         | -2.518907               | -2.206916 | 0.539073  |
|     | 23            | 1             | H         | -1.522666               | -3.556331 | 1.843043  |
|     | 24            | 7             | N         | -0.883183               | 2.568102  | 1.496508  |
|     | 25            | 7             | N         | -1.515975               | -2.674078 | 1.357049  |
|     | 26            | 7             | N         | 3.780457                | 0.400203  | 0.346274  |
|     | 27            | 6             | C         | 3.471790                | -0.625978 | -0.517292 |
|     | 28            | 6             | C         | 1.479296                | -1.696560 | -1.398750 |
|     | 29            | 6             | C         | 2.308915                | -2.521449 | -2.149199 |
|     | 30            | 6             | C         | 3.711405                | -2.407106 | -2.083526 |
|     | 31            | 6             | C         | 4.310671                | -1.456300 | -1.266189 |
|     | 32            | 1             | H         | 1.867274                | -3.270471 | -2.799983 |
|     | 33            | 1             | H         | 4.332697                | -3.067537 | -2.681070 |
|     | 34            | 1             | H         | 5.391517                | -1.357938 | -1.214198 |
|     | 35            | 6             | C         | -3.022506               | -0.223452 | -0.755409 |
|     | 36            | 6             | C         | -4.229117               | -0.816421 | -1.106924 |
|     | 37            | 6             | C         | -4.583575               | -2.098589 | -0.646981 |
|     | 38            | 6             | C         | -3.729346               | -2.809033 | 0.186150  |
|     | 39            | 1             | H         | -2.788636               | 0.765295  | -1.126542 |
|     | 40            | 1             | H         | -4.915525               | -0.275368 | -1.751906 |
|     | 41            | 1             | H         | -5.533506               | -2.534387 | -0.941807 |
|     | 42            | 1             | H         | -3.991539               | -3.796650 | 0.555809  |
|     | 43            | 1             | H         | 0.402059                | -1.802789 | -1.459967 |
|     | 44            | 6             | C         | 0.686677                | -2.051836 | 2.314174  |
|     | 45            | 6             | C         | 2.742854                | 2.122849  | 1.802549  |
|     | 46            | 1             | H         | 1.050955                | -1.144174 | 2.793716  |
|     | 47            | 1             | H         | 0.410346                | -2.762924 | 3.100732  |
|     | 48            | 1             | H         | 1.503622                | -2.491857 | 1.730967  |
|     | 49            | 1             | H         | 3.771310                | 2.496964  | 1.820094  |
|     | 50            | 1             | H         | 2.100983                | 2.954569  | 1.497668  |
|     | 51            | 1             | H         | 2.455575                | 1.847880  | 2.821066  |
| 7ea | Center number | Atomic number | Atom type | Coordinates (Angstroms) |           |           |
|     |               |               |           | X                       | Y         | Z         |
|     | 1             | 6             | C         | 1.248654                | 2.695508  | 1.054387  |
|     | 2             | 6             | C         | 0.377181                | 1.604332  | 0.908309  |
|     | 3             | 6             | C         | 0.109126                | 0.799847  | 2.007179  |
|     | 4             | 6             | C         | 0.716462                | 1.090616  | 3.236852  |
|     | 5             | 6             | C         | 1.583671                | 2.176686  | 3.359459  |
|     | 6             | 6             | C         | 1.862951                | 3.000847  | 2.262965  |
|     | 7             | 6             | C         | 0.596467                | 2.800256  | -1.163156 |
|     | 8             | 6             | C         | -0.118719               | 1.545001  | -0.541546 |
|     | 9             | 1             | H         | -0.562559               | -0.046790 | 1.923609  |
|     | 10            | 1             | H         | 0.512156                | 0.461852  | 4.097430  |
|     | 11            | 1             | H         | 2.051712                | 2.389280  | 4.315833  |
|     | 12            | 1             | H         | 2.537572                | 3.846583  | 2.354685  |
|     | 13            | 1             | H         | 1.943478                | 4.174429  | -0.342806 |
|     | 14            | 8             | O         | 0.491402                | 3.215205  | -2.300634 |
|     | 15            | 6             | C         | -1.624884               | 1.742763  | -0.634478 |
|     | 16            | 6             | C         | -2.269867               | 2.892573  | -1.023653 |
|     | 17            | 6             | C         | -2.663004               | 0.800859  | -0.273277 |
|     | 18            | 1             | H         | -1.852415               | 3.813274  | -1.401277 |
|     | 19            | 1             | H         | -4.319864               | 3.427165  | -1.162412 |

|     |               |               |           |                         |           |           |
|-----|---------------|---------------|-----------|-------------------------|-----------|-----------|
|     | 20            | 6             | C         | 0.346797                | 0.316919  | -1.307667 |
|     | 21            | 6             | C         | -0.301906               | -0.203034 | -2.402176 |
|     | 22            | 6             | C         | 1.571740                | -0.441984 | -1.162261 |
|     | 23            | 1             | H         | -1.239094               | 0.101133  | -2.842092 |
|     | 24            | 6             | C         | 1.577711                | -1.416923 | -2.200621 |
|     | 25            | 1             | H         | 0.143000                | -1.802873 | -3.722625 |
|     | 26            | 7             | N         | 1.369245                | 3.361943  | -0.171531 |
|     | 27            | 7             | N         | 0.425903                | -1.241375 | -2.936415 |
|     | 28            | 7             | N         | -3.634402               | 2.734587  | -0.909809 |
|     | 29            | 6             | C         | -3.909422               | 1.462742  | -0.456833 |
|     | 30            | 6             | C         | -2.670159               | -0.538745 | 0.159256  |
|     | 31            | 6             | C         | -3.892218               | -1.142980 | 0.406657  |
|     | 32            | 6             | C         | -5.119015               | -0.476527 | 0.237249  |
|     | 33            | 6             | C         | -5.135101               | 0.840346  | -0.203012 |
|     | 34            | 1             | H         | -6.045888               | -0.997215 | 0.446128  |
|     | 35            | 1             | H         | -6.075785               | 1.363758  | -0.346249 |
|     | 36            | 6             | C         | 2.664253                | -0.403513 | -0.273828 |
|     | 37            | 6             | C         | 3.687149                | -1.320308 | -0.452709 |
|     | 38            | 6             | C         | 3.680551                | -2.284713 | -1.475745 |
|     | 39            | 6             | C         | 2.614914                | -2.339250 | -2.363638 |
|     | 40            | 1             | H         | 2.713125                | 0.314381  | 0.533827  |
|     | 41            | 1             | H         | 4.507701                | -2.978628 | -1.565634 |
|     | 42            | 1             | H         | 2.595717                | -3.076314 | -3.160959 |
|     | 43            | 1             | H         | -1.749631               | -1.096928 | 0.274185  |
|     | 44            | 35            | Br        | -3.924147               | -2.969606 | 0.994759  |
|     | 45            | 35            | Br        | 5.186557                | -1.282073 | 0.746425  |
| 7ec | Center number | Atomic number | Atom type | Coordinates (Angstroms) |           |           |
|     |               |               |           | X                       | Y         | Z         |
|     | 1             | 6             | C         | 1.247513                | 2.692341  | 0.817012  |
|     | 2             | 6             | C         | 0.366385                | 1.603508  | 0.714974  |
|     | 3             | 6             | C         | 0.076482                | 0.847821  | 1.842256  |
|     | 4             | 6             | C         | 0.684591                | 1.208447  | 3.045687  |
|     | 5             | 6             | C         | 1.561269                | 2.280691  | 3.152282  |
|     | 6             | 6             | C         | 1.853380                | 3.045155  | 2.016608  |
|     | 7             | 6             | C         | 0.611446                | 2.699244  | -1.408161 |
|     | 8             | 6             | C         | -0.122182               | 1.481827  | -0.733234 |
|     | 9             | 1             | H         | -0.598819               | 0.001798  | 1.820640  |
|     | 10            | 1             | H         | 2.006938                | 2.509401  | 4.113656  |
|     | 11            | 1             | H         | 2.536089                | 3.886492  | 2.079583  |
|     | 12            | 1             | H         | 1.967114                | 4.096872  | -0.644692 |
|     | 13            | 8             | O         | 0.517630                | 3.059365  | -2.564876 |
|     | 14            | 6             | C         | -1.625339               | 1.694058  | -0.839701 |
|     | 15            | 6             | C         | -2.253088               | 2.832338  | -1.287181 |
|     | 16            | 6             | C         | -2.677092               | 0.785456  | -0.434824 |
|     | 17            | 1             | H         | -1.821818               | 3.727106  | -1.709023 |
|     | 18            | 1             | H         | -4.294551               | 3.387713  | -1.458001 |
|     | 19            | 6             | C         | 0.332680                | 0.212828  | -1.435064 |
|     | 20            | 6             | C         | -0.331919               | -0.373574 | -2.485570 |
|     | 21            | 6             | C         | 1.564227                | -0.530103 | -1.266698 |
|     | 22            | 1             | H         | -1.278158               | -0.100552 | -2.926417 |
|     | 23            | 6             | C         | 1.557802                | -1.564810 | -2.245080 |
|     | 24            | 1             | H         | 0.098360                | -2.047532 | -3.715294 |
|     | 25            | 7             | N         | 1.382833                | 3.299788  | -0.439076 |
|     | 26            | 7             | N         | 0.392423                | -1.438313 | -2.969709 |
|     | 27            | 7             | N         | -3.619394               | 2.698732  | -1.170082 |
|     | 28            | 6             | C         | -3.913395               | 1.454893  | -0.655038 |
|     | 29            | 6             | C         | -2.704444               | -0.530871 | 0.063669  |
|     | 30            | 6             | C         | -3.935542               | -1.105296 | 0.336414  |
|     | 31            | 6             | C         | -5.152111               | -0.430325 | 0.130189  |
|     | 32            | 6             | C         | -5.148392               | 0.863139  | -0.374650 |
|     | 33            | 1             | H         | -6.086842               | -0.926870 | 0.361521  |
|     | 34            | 1             | H         | -6.081195               | 1.391943  | -0.546610 |
|     | 35            | 6             | C         | 2.671849                | -0.432281 | -0.402367 |
|     | 36            | 6             | C         | 3.697771                | -1.352240 | -0.544103 |
|     | 37            | 6             | C         | 3.678642                | -2.376236 | -1.507377 |
|     | 38            | 6             | C         | 2.597876                | -2.489647 | -2.371119 |
|     | 39            | 1             | H         | 2.731559                | 0.333513  | 0.359378  |
|     | 40            | 1             | H         | 4.508358                | -3.070008 | -1.570539 |
|     | 41            | 1             | H         | 2.569673                | -3.273307 | -3.122370 |
|     | 42            | 1             | H         | -1.792729               | -1.096682 | 0.208380  |
|     | 43            | 35            | Br        | -3.994952               | -2.899937 | 1.011749  |

|     |                      |                      |                  |                                |           |           |
|-----|----------------------|----------------------|------------------|--------------------------------|-----------|-----------|
|     | 44                   | 35                   | Br               | 5.217559                       | -1.232630 | 0.622425  |
|     | 45                   | 9                    | F                | 0.409139                       | 0.480602  | 4.150138  |
| 7ed | <b>Center number</b> | <b>Atomic number</b> | <b>Atom type</b> | <b>Coordinates (Angstroms)</b> |           |           |
|     |                      |                      |                  | <b>X</b>                       | <b>Y</b>  | <b>Z</b>  |
|     | 1                    | 6                    | C                | -1.237674                      | 0.559479  | 2.646998  |
|     | 2                    | 6                    | C                | -0.352499                      | 0.398158  | 1.568754  |
|     | 3                    | 6                    | C                | -0.076521                      | 1.477013  | 0.741879  |
|     | 4                    | 6                    | C                | -0.698450                      | 2.701262  | 1.013042  |
|     | 5                    | 6                    | C                | -1.580494                      | 2.856848  | 2.079319  |
|     | 6                    | 6                    | C                | -1.860397                      | 1.771782  | 2.917263  |
|     | 7                    | 6                    | C                | -0.568879                      | -1.649333 | 2.802707  |
|     | 8                    | 6                    | C                | 0.159049                       | -1.047729 | 1.544819  |
|     | 9                    | 1                    | H                | 0.604462                       | 1.391414  | -0.094898 |
|     | 10                   | 1                    | H                | -2.048866                      | 3.817494  | 2.258466  |
|     | 11                   | 1                    | H                | -2.546541                      | 1.883332  | 3.750849  |
|     | 12                   | 1                    | H                | -1.941152                      | -0.811586 | 4.143854  |
|     | 13                   | 8                    | O                | -0.462055                      | -2.776469 | 3.241631  |
|     | 14                   | 6                    | C                | 1.662825                       | -1.115758 | 1.768367  |
|     | 15                   | 6                    | C                | 2.292582                       | -1.472265 | 2.937366  |
|     | 16                   | 6                    | C                | 2.711998                       | -0.758742 | 0.836774  |
|     | 17                   | 1                    | H                | 1.864538                       | -1.836601 | 3.858579  |
|     | 18                   | 1                    | H                | 4.333870                       | -1.571236 | 3.509797  |
|     | 19                   | 6                    | C                | -0.280903                      | -1.840956 | 0.325456  |
|     | 20                   | 6                    | C                | 0.406011                       | -2.913239 | -0.191968 |
|     | 21                   | 6                    | C                | -1.516581                      | -1.748556 | -0.424035 |
|     | 22                   | 1                    | H                | 1.361940                       | -3.314500 | 0.107054  |
|     | 23                   | 6                    | C                | -1.489737                      | -2.792793 | -1.391763 |
|     | 24                   | 1                    | H                | 0.001164                       | -4.259522 | -1.780076 |
|     | 25                   | 7                    | N                | -1.357421                      | -0.651747 | 3.335743  |
|     | 26                   | 7                    | N                | -0.308505                      | -3.481885 | -1.220663 |
|     | 27                   | 7                    | N                | 3.657191                       | -1.343206 | 2.800174  |
|     | 28                   | 6                    | C                | 3.948475                       | -0.912219 | 1.524070  |
|     | 29                   | 6                    | C                | 2.737622                       | -0.353418 | -0.511306 |
|     | 30                   | 6                    | C                | 3.967041                       | -0.103810 | -1.099661 |
|     | 31                   | 6                    | C                | 5.183538                       | -0.243527 | -0.407678 |
|     | 32                   | 6                    | C                | 5.181771                       | -0.655474 | 0.918202  |
|     | 33                   | 1                    | H                | 6.116853                       | -0.033731 | -0.916291 |
|     | 34                   | 1                    | H                | 6.114628                       | -0.775312 | 1.461060  |
|     | 35                   | 6                    | C                | -2.643001                      | -0.904347 | -0.380685 |
|     | 36                   | 6                    | C                | -3.667075                      | -1.129626 | -1.285958 |
|     | 37                   | 6                    | C                | -3.627603                      | -2.157872 | -2.244068 |
|     | 38                   | 6                    | C                | -2.527846                      | -3.002770 | -2.303429 |
|     | 39                   | 1                    | H                | -2.718922                      | -0.094321 | 0.332324  |
|     | 40                   | 1                    | H                | -4.456692                      | -2.285264 | -2.929707 |
|     | 41                   | 1                    | H                | -2.483699                      | -3.803268 | -3.035896 |
|     | 42                   | 1                    | H                | 1.826535                       | -0.261419 | -1.088976 |
|     | 43                   | 35                   | Br               | 4.024560                       | 0.442759  | -2.937294 |
|     | 44                   | 35                   | Br               | -5.212850                      | 0.007052  | -1.238408 |
|     | 45                   | 35                   | Br               | -0.326282                      | 4.199660  | -0.116377 |
| 7fa | <b>Center number</b> | <b>Atomic number</b> | <b>Atom type</b> | <b>Coordinates (Angstroms)</b> |           |           |
|     |                      |                      |                  | <b>X</b>                       | <b>Y</b>  | <b>Z</b>  |
|     | 1                    | 6                    | C                | 0.678557                       | 2.865786  | -0.441465 |
|     | 2                    | 6                    | C                | 0.279817                       | 1.763847  | 0.332386  |
|     | 3                    | 6                    | C                | 0.203704                       | 1.897962  | 1.711424  |
|     | 4                    | 6                    | C                | 0.532125                       | 3.126136  | 2.303149  |
|     | 5                    | 6                    | C                | 0.932276                       | 4.206945  | 1.516825  |
|     | 6                    | 6                    | C                | 1.010078                       | 4.091581  | 0.123698  |
|     | 7                    | 6                    | C                | 0.262203                       | 1.209116  | -2.002616 |
|     | 8                    | 6                    | C                | -0.010962                      | 0.574628  | -0.591132 |
|     | 9                    | 1                    | H                | -0.109753                      | 1.064702  | 2.329737  |
|     | 10                   | 1                    | H                | 0.475457                       | 3.234055  | 3.381728  |
|     | 11                   | 1                    | H                | 1.186271                       | 5.152739  | 1.986221  |
|     | 12                   | 1                    | H                | 1.318493                       | 4.931183  | -0.492044 |
|     | 13                   | 1                    | H                | 0.929710                       | 3.112541  | -2.561774 |
|     | 14                   | 8                    | O                | 0.133046                       | 0.676737  | -3.087651 |
|     | 15                   | 6                    | C                | -1.470475                      | 0.148380  | -0.516384 |
|     | 16                   | 6                    | C                | -2.446416                      | 0.428347  | -1.442541 |
|     | 17                   | 6                    | C                | -2.129353                      | -0.561703 | 0.558161  |
|     | 18                   | 1                    | H                | -2.355065                      | 0.912599  | -2.403393 |
|     | 19                   | 6                    | C                | 0.940924                       | -0.598166 | -0.414571 |
|     | 20                   | 6                    | C                | 0.637078                       | -1.892449 | -0.761693 |

|     |               |               |           |                         |           |           |
|-----|---------------|---------------|-----------|-------------------------|-----------|-----------|
|     | 21            | 6             | C         | 2.332623                | -0.602128 | -0.016311 |
|     | 22            | 1             | H         | -0.297485               | -2.294009 | -1.123815 |
|     | 23            | 6             | C         | 2.785268                | -1.948515 | -0.136190 |
|     | 24            | 7             | N         | 0.676282                | 2.507610  | -1.794468 |
|     | 25            | 7             | N         | 1.731111                | -2.713959 | -0.595488 |
|     | 26            | 7             | N         | -3.674049               | -0.040737 | -1.018957 |
|     | 27            | 6             | C         | -3.506225               | -0.654309 | 0.206716  |
|     | 28            | 6             | C         | -1.707845               | -1.151015 | 1.764533  |
|     | 29            | 6             | C         | -2.642084               | -1.780438 | 2.578124  |
|     | 30            | 6             | C         | -4.001509               | -1.845235 | 2.214349  |
|     | 31            | 6             | C         | -4.450308               | -1.288005 | 1.022772  |
|     | 32            | 1             | H         | -2.318884               | -2.236859 | 3.509100  |
|     | 33            | 1             | H         | -4.708466               | -2.343858 | 2.870785  |
|     | 34            | 1             | H         | -5.496074               | -1.346352 | 0.736480  |
|     | 35            | 6             | C         | 3.251532                | 0.369316  | 0.424887  |
|     | 36            | 6             | C         | 4.551618                | -0.013193 | 0.731739  |
|     | 37            | 6             | C         | 4.970139                | -1.352579 | 0.612623  |
|     | 38            | 6             | C         | 4.091881                | -2.337780 | 0.178099  |
|     | 39            | 1             | H         | 2.952756                | 1.405578  | 0.531341  |
|     | 40            | 1             | H         | 5.260389                | 0.735878  | 1.072691  |
|     | 41            | 1             | H         | 5.992601                | -1.619567 | 0.863079  |
|     | 42            | 1             | H         | 4.411109                | -3.371313 | 0.083573  |
|     | 43            | 1             | H         | -0.659815               | -1.136564 | 2.044257  |
|     | 44            | 6             | C         | 1.766559                | -4.142361 | -0.828640 |
|     | 45            | 6             | C         | -4.919868               | 0.054888  | -1.750438 |
|     | 46            | 1             | H         | 0.800985                | -4.461793 | -1.223628 |
|     | 47            | 1             | H         | 2.542320                | -4.399590 | -1.558118 |
|     | 48            | 1             | H         | 1.963273                | -4.692266 | 0.098995  |
|     | 49            | 1             | H         | -5.674556               | 0.599236  | -1.171857 |
|     | 50            | 1             | H         | -4.743899               | 0.593487  | -2.682862 |
|     | 51            | 1             | H         | -5.315163               | -0.938449 | -1.991935 |
| 7fb | Center number | Atomic number | Atom type | Coordinates (Angstroms) |           |           |
|     |               |               |           | X                       | Y         | Z         |
|     | 1             | 6             | C         | 0.708645                | 2.567740  | -1.088448 |
|     | 2             | 6             | C         | 0.298377                | 1.638041  | -0.118562 |
|     | 3             | 6             | C         | 0.237151                | 2.020099  | 1.213790  |
|     | 4             | 6             | C         | 0.595630                | 3.329729  | 1.536439  |
|     | 5             | 6             | C         | 1.007915                | 4.252480  | 0.583870  |
|     | 6             | 6             | C         | 1.066656                | 3.870007  | -0.761943 |
|     | 7             | 6             | C         | 0.247499                | 0.654696  | -2.306970 |
|     | 8             | 6             | C         | -0.024967               | 0.302908  | -0.799075 |
|     | 9             | 1             | H         | -0.081110               | 1.344611  | 1.997715  |
|     | 10            | 1             | H         | 1.276138                | 5.255581  | 0.895758  |
|     | 11            | 1             | H         | 1.383970                | 4.576901  | -1.522116 |
|     | 12            | 1             | H         | 0.943954                | 2.404394  | -3.219748 |
|     | 13            | 8             | O         | 0.099015                | -0.071851 | -3.269757 |
|     | 14            | 6             | C         | -1.492809               | -0.065484 | -0.635612 |
|     | 15            | 6             | C         | -2.470504               | 0.052734  | -1.594432 |
|     | 16            | 6             | C         | -2.157436               | -0.536911 | 0.559797  |
|     | 17            | 1             | H         | -2.376784               | 0.338600  | -2.631523 |
|     | 18            | 6             | C         | 0.903960                | -0.834431 | -0.406178 |
|     | 19            | 6             | C         | 0.564406                | -2.164014 | -0.477215 |
|     | 20            | 6             | C         | 2.304179                | -0.792800 | -0.042010 |
|     | 21            | 1             | H         | -0.386724               | -2.606715 | -0.732355 |
|     | 22            | 6             | C         | 2.725152                | -2.146398 | 0.106025  |
|     | 23            | 7             | N         | 0.685464                | 1.960742  | -2.350805 |
|     | 24            | 7             | N         | 1.644317                | -2.961973 | -0.168060 |
|     | 25            | 7             | N         | -3.703840               | -0.295939 | -1.082290 |
|     | 26            | 6             | C         | -3.538989               | -0.662901 | 0.238964  |
|     | 27            | 6             | C         | -1.738806               | -0.890107 | 1.856166  |
|     | 28            | 6             | C         | -2.680055               | -1.325634 | 2.780858  |
|     | 29            | 6             | C         | -4.043724               | -1.426973 | 2.442361  |
|     | 30            | 6             | C         | -4.490123               | -1.102287 | 1.166854  |
|     | 31            | 1             | H         | -2.359221               | -1.598864 | 3.781718  |
|     | 32            | 1             | H         | -4.756111               | -1.770226 | 3.186595  |
|     | 33            | 1             | H         | -5.539429               | -1.189766 | 0.901867  |
|     | 34            | 6             | C         | 3.253433                | 0.224271  | 0.174454  |
|     | 35            | 6             | C         | 4.552023                | -0.120544 | 0.528352  |
|     | 36            | 6             | C         | 4.939046                | -1.466443 | 0.676599  |
|     | 37            | 6             | C         | 4.030326                | -2.496740 | 0.468242  |
|     | 38            | 1             | H         | 2.979873                | 1.268051  | 0.072507  |

|     |               |               |           |                         |           |           |
|-----|---------------|---------------|-----------|-------------------------|-----------|-----------|
|     | 39            | 1             | H         | 5.284218                | 0.663805  | 0.696475  |
|     | 40            | 1             | H         | 5.961164                | -1.702840 | 0.957148  |
|     | 41            | 1             | H         | 4.325480                | -3.535630 | 0.580154  |
|     | 42            | 1             | H         | -0.688273               | -0.848561 | 2.123709  |
|     | 43            | 9             | F         | 0.540700                | 3.712882  | 2.832800  |
|     | 44            | 6             | C         | 1.644206                | -4.408636 | -0.106666 |
|     | 45            | 6             | C         | -4.954303               | -0.313570 | -1.812348 |
|     | 46            | 1             | H         | 0.662294                | -4.776760 | -0.407745 |
|     | 47            | 1             | H         | 2.395317                | -4.827978 | -0.784875 |
|     | 48            | 1             | H         | 1.853507                | -4.763379 | 0.909080  |
|     | 49            | 1             | H         | -5.688845               | 0.355028  | -1.349823 |
| 7fd | 50            | 1             | H         | -4.773895               | 0.023901  | -2.834095 |
|     | 51            | 1             | H         | -5.376851               | -1.324088 | -1.849360 |
|     | Center number | Atomic number | Atom type | Coordinates (Angstroms) |           |           |
|     |               |               |           | X                       | Y         | Z         |
|     | 1             | 6             | C         | 1.336027                | -0.589849 | 2.247820  |
|     | 2             | 6             | C         | 0.759550                | -0.515631 | 0.969085  |
|     | 3             | 6             | C         | 1.331954                | -1.217480 | -0.081106 |
|     | 4             | 6             | C         | 2.478509                | -1.978949 | 0.172531  |
|     | 5             | 6             | C         | 3.051908                | -2.046960 | 1.439401  |
|     | 6             | 6             | C         | 2.475356                | -1.343378 | 2.503011  |
|     | 7             | 6             | C         | -0.504561               | 0.780108  | 2.542283  |
|     | 8             | 6             | C         | -0.478964               | 0.387580  | 1.020735  |
|     | 9             | 1             | H         | 0.908355                | -1.189846 | -1.076488 |
|     | 10            | 1             | H         | 3.941406                | -2.644771 | 1.600287  |
|     | 11            | 1             | H         | 2.912914                | -1.391276 | 3.495325  |
|     | 12            | 1             | H         | 0.795142                | 0.315548  | 4.118583  |
|     | 13            | 8             | O         | -1.326927               | 1.468763  | 3.111766  |
|     | 14            | 6             | C         | -1.747409               | -0.386292 | 0.689953  |
|     | 15            | 6             | C         | -2.685914               | -0.829470 | 1.591275  |
|     | 16            | 6             | C         | -2.176818               | -0.865467 | -0.605853 |
|     | 17            | 1             | H         | -2.747284               | -0.651650 | 2.654626  |
|     | 18            | 6             | C         | -0.350949               | 1.664993  | 0.207161  |
|     | 19            | 6             | C         | -1.419827               | 2.365566  | -0.297953 |
|     | 20            | 6             | C         | 0.824374                | 2.462822  | -0.070338 |
|     | 21            | 1             | H         | -2.468136               | 2.108006  | -0.277681 |
|     | 22            | 6             | C         | 0.372323                | 3.622364  | -0.764760 |
|     | 23            | 7             | N         | 0.590166                | 0.186769  | 3.138558  |
|     | 24            | 7             | N         | -1.001189               | 3.538116  | -0.887550 |
|     | 25            | 7             | N         | -3.665746               | -1.564936 | 0.956284  |
|     | 26            | 6             | C         | -3.377072               | -1.601513 | -0.393925 |
|     | 27            | 6             | C         | -1.697426               | -0.735851 | -1.922717 |
|     | 28            | 6             | C         | -2.391284               | -1.342034 | -2.962679 |
|     | 29            | 6             | C         | -3.568960               | -2.077290 | -2.724104 |
|     | 30            | 6             | C         | -4.079796               | -2.212448 | -1.438740 |
|     | 31            | 1             | H         | -2.022927               | -1.243685 | -3.979459 |
|     | 32            | 1             | H         | -4.089179               | -2.540205 | -3.557312 |
|     | 33            | 1             | H         | -4.992752               | -2.770674 | -1.254981 |
|     | 34            | 6             | C         | 2.203260                | 2.338635  | 0.185674  |
|     | 35            | 6             | C         | 3.068703                | 3.335294  | -0.247925 |
|     | 36            | 6             | C         | 2.595972                | 4.467141  | -0.939741 |
|     | 37            | 6             | C         | 1.241796                | 4.624823  | -1.207990 |
|     | 38            | 1             | H         | 2.594108                | 1.474490  | 0.710314  |
|     | 39            | 1             | H         | 4.132577                | 3.238944  | -0.052058 |
|     | 40            | 1             | H         | 3.298710                | 5.227084  | -1.268236 |
|     | 41            | 1             | H         | 0.873573                | 5.496712  | -1.740096 |
|     | 42            | 1             | H         | -0.809732               | -0.147164 | -2.128385 |
|     | 43            | 9             | F         | -1.847759               | 4.505825  | -1.553734 |
|     | 44            | 6             | C         | -4.822356               | -2.165755 | 1.587569  |
|     | 45            | 6             | C         | -2.888073               | 4.190034  | -1.462486 |
|     | 46            | 1             | H         | -1.743694               | 5.495623  | -1.096103 |
|     | 47            | 1             | H         | -1.599048               | 4.584890  | -2.618243 |
|     | 48            | 1             | H         | -4.835537               | -3.250261 | 1.432320  |
|     | 49            | 1             | H         | -4.783579               | -1.969861 | 2.660196  |
|     | 50            | 1             | H         | -5.753081               | -1.744903 | 1.190540  |
|     | 51            | 35            | Br        | 3.282434                | -2.952500 | -1.267583 |
| 7ga | Center number | Atomic number | Atom type | Coordinates (Angstroms) |           |           |
|     |               |               |           | X                       | Y         | Z         |
|     | 1             | 6             | C         | -1.176297               | 2.847636  | -0.964977 |
|     | 2             | 6             | C         | -0.401381               | 1.677282  | -0.930910 |
|     | 3             | 6             | C         | -0.226328               | 0.946636  | -2.097891 |

|     |               |               |           |                         |           |           |
|-----|---------------|---------------|-----------|-------------------------|-----------|-----------|
|     | 4             | 6             | C         | -0.829336               | 1.389520  | -3.283581 |
|     | 5             | 6             | C         | -1.599961               | 2.552580  | -3.294917 |
|     | 6             | 6             | C         | -1.784498               | 3.303935  | -2.128271 |
|     | 7             | 6             | C         | -0.473278               | 2.711306  | 1.235400  |
|     | 8             | 6             | C         | 0.115539                | 1.454895  | 0.495579  |
|     | 9             | 1             | H         | 0.369940                | 0.041351  | -2.100313 |
|     | 10            | 1             | H         | -0.697795               | 0.819057  | -4.197368 |
|     | 11            | 1             | H         | -2.065931               | 2.883206  | -4.218234 |
|     | 12            | 1             | H         | -2.383867               | 4.209247  | -2.133413 |
|     | 13            | 1             | H         | -1.711974               | 4.258750  | 0.566021  |
|     | 14            | 8             | O         | -0.310141               | 3.020833  | 2.399484  |
|     | 15            | 6             | C         | 1.634746                | 1.512307  | 0.564016  |
|     | 16            | 6             | C         | 2.388844                | 2.566242  | 1.023433  |
|     | 17            | 6             | C         | 2.579121                | 0.519328  | 0.104451  |
|     | 18            | 1             | H         | 2.061305                | 3.487165  | 1.482335  |
|     | 19            | 6             | C         | -0.443358               | 0.212260  | 1.170003  |
|     | 20            | 6             | C         | 0.173526                | -0.451299 | 2.204095  |
|     | 21            | 6             | C         | -1.731284               | -0.422827 | 0.998288  |
|     | 22            | 1             | H         | 1.142526                | -0.266490 | 2.643040  |
|     | 23            | 6             | C         | -1.799553               | -1.473432 | 1.958944  |
|     | 24            | 7             | N         | -1.213296               | 3.418051  | 0.313610  |
|     | 25            | 7             | N         | -0.624731               | -1.466391 | 2.683027  |
|     | 26            | 7             | N         | 3.736439                | 2.312306  | 0.869590  |
|     | 27            | 6             | C         | 3.880645                | 1.060273  | 0.308454  |
|     | 28            | 6             | C         | 2.464084                | -0.776463 | -0.431486 |
|     | 29            | 6             | C         | 3.625912                | -1.458910 | -0.756193 |
|     | 30            | 6             | C         | 4.907615                | -0.913142 | -0.566279 |
|     | 31            | 6             | C         | 5.044102                | 0.358790  | -0.024437 |
|     | 32            | 1             | H         | 5.782649                | -1.491037 | -0.838776 |
|     | 33            | 1             | H         | 6.029579                | 0.785174  | 0.134228  |
|     | 34            | 6             | C         | -2.833413               | -0.220286 | 0.145939  |
|     | 35            | 6             | C         | -3.928835               | -1.058229 | 0.280394  |
|     | 36            | 6             | C         | -3.985340               | -2.098650 | 1.223665  |
|     | 37            | 6             | C         | -2.910088               | -2.315210 | 2.075517  |
|     | 38            | 1             | H         | -2.835926               | 0.561257  | -0.602003 |
|     | 39            | 1             | H         | -4.867464               | -2.725111 | 1.280730  |
|     | 40            | 1             | H         | -2.941793               | -3.114922 | 2.808671  |
|     | 41            | 1             | H         | 1.497253                | -1.244592 | -0.566977 |
|     | 42            | 6             | C         | -0.277949               | -2.399365 | 3.736104  |
|     | 43            | 6             | C         | 4.819338                | 3.191263  | 1.262477  |
|     | 44            | 1             | H         | 0.689893                | -2.118705 | 4.153794  |
|     | 45            | 1             | H         | -1.022958               | -2.373837 | 4.538359  |
|     | 46            | 1             | H         | -0.209029               | -3.423379 | 3.352184  |
|     | 47            | 1             | H         | 5.440904                | 3.457671  | 0.400655  |
|     | 48            | 1             | H         | 4.398745                | 4.106013  | 1.682398  |
|     | 49            | 1             | H         | 5.454598                | 2.720284  | 2.020845  |
|     | 50            | 35            | Br        | -5.443095               | -0.795899 | -0.871597 |
|     | 51            | 35            | Br        | 3.490700                | -3.229363 | -1.485905 |
| 7gc | Center number | Atomic number | Atom type | Coordinates (Angstroms) |           |           |
|     |               |               |           | X                       | Y         | Z         |
|     | 1             | 6             | C         | 1.185183                | 2.856201  | 0.620687  |
|     | 2             | 6             | C         | 0.396177                | 1.695851  | 0.678476  |
|     | 3             | 6             | C         | 0.203200                | 1.057440  | 1.895402  |
|     | 4             | 6             | C         | 0.813109                | 1.604858  | 3.025136  |
|     | 5             | 6             | C         | 1.599372                | 2.748872  | 2.974130  |
|     | 6             | 6             | C         | 1.793458                | 3.395258  | 1.747657  |
|     | 7             | 6             | C         | 0.485568                | 2.549823  | -1.564115 |
|     | 8             | 6             | C         | -0.121650               | 1.364841  | -0.726166 |
|     | 9             | 1             | H         | -0.399081               | 0.163317  | 1.996468  |
|     | 10            | 1             | H         | 2.051737                | 3.124060  | 3.885067  |
|     | 11            | 1             | H         | 2.404635                | 4.290120  | 1.687277  |
|     | 12            | 1             | H         | 1.742262                | 4.130994  | -1.019903 |
|     | 13            | 8             | O         | 0.328287                | 2.763451  | -2.750106 |
|     | 14            | 6             | C         | -1.639724               | 1.438643  | -0.798623 |
|     | 15            | 6             | C         | -2.377773               | 2.462501  | -1.344594 |
|     | 16            | 6             | C         | -2.598522               | 0.502165  | -0.257358 |
|     | 17            | 1             | H         | -2.036295               | 3.336457  | -1.878976 |
|     | 18            | 6             | C         | 0.421357                | 0.063412  | -1.292697 |
|     | 19            | 6             | C         | -0.215288               | -0.693316 | -2.247849 |
|     | 20            | 6             | C         | 1.712726                | -0.553959 | -1.087275 |
|     | 21            | 1             | H         | -1.192607               | -0.549294 | -2.683494 |

|     |               |               |           |                         |           |           |
|-----|---------------|---------------|-----------|-------------------------|-----------|-----------|
|     | 22            | 6             | C         | 1.762863                | -1.690302 | -1.945619 |
|     | 23            | 7             | N         | 1.231915                | 3.320471  | -0.701235 |
|     | 24            | 7             | N         | 0.573879                | -1.749973 | -2.644035 |
|     | 25            | 7             | N         | -3.728345               | 2.242927  | -1.170753 |
|     | 26            | 6             | C         | -3.891419               | 1.044462  | -0.506632 |
|     | 27            | 6             | C         | -2.503550               | -0.746066 | 0.385208  |
|     | 28            | 6             | C         | -3.675682               | -1.381104 | 0.764734  |
|     | 29            | 6             | C         | -4.948626               | -0.832550 | 0.529006  |
|     | 30            | 6             | C         | -5.065531               | 0.391651  | -0.117056 |
|     | 31            | 1             | H         | -5.832475               | -1.371797 | 0.848223  |
|     | 32            | 1             | H         | -6.044227               | 0.818826  | -0.311341 |
|     | 33            | 6             | C         | 2.831446                | -0.272082 | -0.280748 |
|     | 34            | 6             | C         | 3.925445                | -1.119149 | -0.357042 |
|     | 35            | 6             | C         | 3.963758                | -2.244348 | -1.198408 |
|     | 36            | 6             | C         | 2.871910                | -2.540004 | -2.004150 |
|     | 37            | 1             | H         | 2.849259                | 0.577475  | 0.388805  |
|     | 38            | 1             | H         | 4.845281                | -2.874036 | -1.213658 |
|     | 39            | 1             | H         | 2.890083                | -3.405527 | -2.658764 |
|     | 40            | 1             | H         | -1.544493               | -1.217551 | 0.559470  |
|     | 41            | 6             | C         | 0.207677                | -2.776792 | -3.598928 |
|     | 42            | 6             | C         | -4.798312               | 3.102784  | -1.635572 |
|     | 43            | 1             | H         | -0.770913               | -2.538460 | -4.017807 |
|     | 44            | 1             | H         | 0.934050                | -2.823030 | -4.417161 |
|     | 45            | 1             | H         | 0.152605                | -3.761065 | -3.120679 |
|     | 46            | 1             | H         | -5.414121               | 3.449678  | -0.798698 |
|     | 47            | 1             | H         | -4.364346               | 3.972542  | -2.130710 |
|     | 48            | 1             | H         | -5.441718               | 2.579634  | -2.351596 |
|     | 49            | 35            | Br        | 5.462036                | -0.747984 | 0.732778  |
|     | 50            | 35            | Br        | -3.567890               | -3.086623 | 1.637547  |
|     | 51            | 9             | F         | 0.631529                | 0.992532  | 4.215940  |
| 7gd | Center number | Atomic number | Atom type | Coordinates (Angstroms) |           |           |
|     |               |               |           | X                       | Y         | Z         |
|     | 1             | 6             | C         | -1.173300               | 1.062174  | 2.580170  |
|     | 2             | 6             | C         | -0.376547               | 0.771387  | 1.460917  |
|     | 3             | 6             | C         | -0.216752               | 1.725795  | 0.467298  |
|     | 4             | 6             | C         | -0.863999               | 2.957875  | 0.615998  |
|     | 5             | 6             | C         | -1.658540               | 3.241488  | 1.723879  |
|     | 6             | 6             | C         | -1.820983               | 2.282316  | 2.729671  |
|     | 7             | 6             | C         | -0.400747               | -1.079755 | 2.988076  |
|     | 8             | 6             | C         | 0.191418                | -0.646979 | 1.596931  |
|     | 9             | 1             | H         | 0.394049                | 1.538623  | -0.406355 |
|     | 10            | 1             | H         | -2.149798               | 4.203950  | 1.805432  |
|     | 11            | 1             | H         | -2.438267               | 2.494149  | 3.597001  |
|     | 12            | 1             | H         | -1.691211               | -0.097482 | 4.312807  |
|     | 13            | 8             | O         | -0.210564               | -2.127253 | 3.572478  |
|     | 14            | 6             | C         | 1.710204                | -0.637800 | 1.690683  |
|     | 15            | 6             | C         | 2.453726                | -0.797727 | 2.836524  |
|     | 16            | 6             | C         | 2.661490                | -0.392999 | 0.630125  |
|     | 17            | 1             | H         | 2.120302                | -1.033206 | 3.836214  |
|     | 18            | 6             | C         | -0.318406               | -1.620249 | 0.547247  |
|     | 19            | 6             | C         | 0.362836                | -2.738500 | 0.127751  |
|     | 20            | 6             | C         | -1.614382               | -1.676830 | -0.091732 |
|     | 21            | 1             | H         | 1.357382                | -3.063753 | 0.393675  |
|     | 22            | 6             | C         | -1.621622               | -2.853219 | -0.895597 |
|     | 23            | 7             | N         | -1.182608               | -0.038634 | 3.442666  |
|     | 24            | 7             | N         | -0.403071               | -3.482907 | -0.741110 |
|     | 25            | 7             | N         | 3.799978                | -0.655844 | 2.573453  |
|     | 26            | 6             | C         | 3.955186                | -0.408050 | 1.224900  |
|     | 27            | 6             | C         | 2.560431                | -0.190692 | -0.758789 |
|     | 28            | 6             | C         | 3.726988                | 0.004472  | -1.481454 |
|     | 29            | 6             | C         | 5.000215                | 0.003367  | -0.884922 |
|     | 30            | 6             | C         | 5.123613                | -0.208470 | 0.482321  |
|     | 31            | 1             | H         | 5.879494                | 0.162546  | -1.497611 |
|     | 32            | 1             | H         | 6.102891                | -0.219638 | 0.950231  |
|     | 33            | 6             | C         | -2.768424               | -0.871155 | -0.070402 |
|     | 34            | 6             | C         | -3.854532               | -1.259998 | -0.838167 |
|     | 35            | 6             | C         | -3.850626               | -2.416499 | -1.636906 |
|     | 36            | 6             | C         | -2.723141               | -3.226572 | -1.671880 |
|     | 37            | 1             | H         | -2.819471               | 0.033245  | 0.521143  |
|     | 38            | 1             | H         | -4.727812               | -2.669228 | -2.220412 |
|     | 39            | 1             | H         | -2.708645               | -4.122543 | -2.284248 |

|     |               |               |           |                         |           |           |
|-----|---------------|---------------|-----------|-------------------------|-----------|-----------|
|     | 40            | 1             | H         | 1.602095                | -0.210688 | -1.262353 |
|     | 41            | 6             | C         | 0.009148                | -4.698138 | -1.414784 |
|     | 42            | 6             | C         | 4.874516                | -0.779892 | 3.538047  |
|     | 43            | 1             | H         | 1.003800                | -4.977538 | -1.064828 |
|     | 44            | 1             | H         | -0.680957               | -5.518710 | -1.192037 |
|     | 45            | 1             | H         | 0.048125                | -4.555363 | -2.500389 |
|     | 46            | 1             | H         | 5.457136                | 0.145800  | 3.596935  |
|     | 47            | 1             | H         | 4.447041                | -0.983787 | 4.520714  |
|     | 48            | 1             | H         | 5.548163                | -1.602532 | 3.273997  |
|     | 49            | 35            | Br        | -0.651476               | 4.286381  | -0.744296 |
|     | 50            | 35            | Br        | -5.439146               | -0.176707 | -0.817252 |
|     | 51            | 35            | Br        | 3.611579                | 0.275006  | -3.377316 |
| 7ai | Center number | Atomic number | Atom type | Coordinates (Angstroms) |           |           |
|     |               |               |           | X                       | Y         | Z         |
|     | 1             | 6             | C         | -1.475318               | 0.914115  | -0.240970 |
|     | 2             | 6             | C         | -2.453259               | 1.663154  | -0.851167 |
|     | 3             | 6             | C         | -2.118502               | -0.323320 | 0.161000  |
|     | 4             | 1             | H         | -2.396980               | 2.644982  | -1.295941 |
|     | 5             | 1             | H         | -4.518749               | 1.322198  | -1.240595 |
|     | 6             | 6             | C         | 0.906182                | 0.279876  | -0.653951 |
|     | 7             | 6             | C         | 1.021010                | 0.138797  | -2.018099 |
|     | 8             | 6             | C         | 1.747640                | -0.760667 | -0.083998 |
|     | 9             | 1             | H         | 0.532822                | 0.695882  | -2.804347 |
|     | 10            | 6             | C         | 2.335754                | -1.469376 | -1.175241 |
|     | 11            | 1             | H         | 2.106687                | -1.192648 | -3.268857 |
|     | 12            | 7             | N         | 1.873093                | -0.895290 | -2.336219 |
|     | 13            | 7             | N         | -3.655624               | 0.979244  | -0.853653 |
|     | 14            | 6             | C         | -3.482768               | -0.239959 | -0.236544 |
|     | 15            | 6             | C         | -1.688313               | -1.497486 | 0.808209  |
|     | 16            | 6             | C         | -2.599878               | -2.518589 | 1.045173  |
|     | 17            | 6             | C         | -3.946550               | -2.404982 | 0.646956  |
|     | 18            | 6             | C         | -4.404837               | -1.265226 | -0.001264 |
|     | 19            | 1             | H         | -2.268059               | -3.424797 | 1.543398  |
|     | 20            | 1             | H         | -4.635468               | -3.220657 | 0.846212  |
|     | 21            | 1             | H         | -5.441078               | -1.172868 | -0.315072 |
|     | 22            | 6             | C         | 2.076960                | -1.203414 | 1.216792  |
|     | 23            | 6             | C         | 2.942859                | -2.275941 | 1.386853  |
|     | 24            | 6             | C         | 3.511302                | -2.943744 | 0.285248  |
|     | 25            | 6             | C         | 3.212428                | -2.546088 | -1.010226 |
|     | 26            | 1             | H         | 1.662857                | -0.719663 | 2.092362  |
|     | 27            | 1             | H         | 3.186905                | -2.605910 | 2.392360  |
|     | 28            | 1             | H         | 4.186179                | -3.778158 | 0.450300  |
|     | 29            | 1             | H         | 3.639842                | -3.055137 | -1.869839 |
|     | 30            | 1             | H         | -0.653644               | -1.617145 | 1.108152  |
|     | 31            | 6             | C         | 0.207730                | 1.517566  | 1.516955  |
|     | 32            | 6             | C         | -0.021545               | 1.328756  | -0.013450 |
|     | 33            | 6             | C         | 0.234222                | 2.720598  | -0.668051 |
|     | 34            | 6             | C         | 1.616476                | 3.303096  | -0.348195 |
|     | 35            | 6             | C         | 1.809616                | 3.460615  | 1.165397  |
|     | 36            | 6             | C         | 1.571488                | 2.126535  | 1.884602  |
|     | 37            | 1             | H         | -0.584553               | 2.190637  | 1.869138  |
|     | 38            | 1             | H         | 0.087365                | 2.661976  | -1.752135 |
|     | 39            | 1             | H         | 2.394866                | 2.644377  | -0.752739 |
|     | 40            | 1             | H         | 2.814606                | 3.839020  | 1.387440  |
|     | 41            | 1             | H         | 1.621647                | 2.267356  | 2.971647  |
|     | 42            | 1             | H         | -0.526308               | 3.416287  | -0.289227 |
|     | 43            | 1             | H         | 1.729829                | 4.271837  | -0.850189 |
|     | 44            | 1             | H         | 1.100914                | 4.211823  | 1.543066  |
|     | 45            | 1             | H         | 2.377995                | 1.432910  | 1.623223  |
|     | 46            | 1             | H         | 0.043868                | 0.574108  | 2.044564  |
| 7ei | Center number | Atomic number | Atom type | Coordinates (Angstroms) |           |           |
|     |               |               |           | X                       | Y         | Z         |
|     | 1             | 6             | C         | -2.477864               | -1.128242 | -0.145513 |
|     | 2             | 6             | C         | -3.802480               | -1.486317 | -0.054389 |
|     | 3             | 6             | C         | -2.461396               | 0.321825  | -0.117954 |
|     | 4             | 1             | H         | -4.253704               | -2.466543 | -0.037297 |
|     | 5             | 1             | H         | -5.608676               | -0.369726 | 0.094415  |
|     | 6             | 6             | C         | -0.291778               | -1.790217 | 0.861959  |
|     | 7             | 6             | C         | -0.571904               | -2.097280 | 2.174593  |
|     | 8             | 6             | C         | 1.008313                | -1.141355 | 0.887204  |
|     | 9             | 1             | H         | -1.453869               | -2.561118 | 2.591482  |

|     |               |               |           |                         |           |           |
|-----|---------------|---------------|-----------|-------------------------|-----------|-----------|
|     | 10            | 6             | C         | 1.437814                | -1.111109 | 2.248316  |
|     | 11            | 1             | H         | 0.470435                | -1.813363 | 4.003813  |
|     | 12            | 7             | N         | 0.453011                | -1.701999 | 3.003606  |
|     | 13            | 7             | N         | -4.604775               | -0.363461 | 0.025264  |
|     | 14            | 6             | C         | -3.811599               | 0.760471  | -0.015148 |
|     | 15            | 6             | C         | -1.443612               | 1.293684  | -0.162419 |
|     | 16            | 6             | C         | -1.807455               | 2.629817  | -0.115381 |
|     | 17            | 6             | C         | -3.145013               | 3.053226  | -0.020964 |
|     | 18            | 6             | C         | -4.164347               | 2.112428  | 0.032594  |
|     | 19            | 1             | H         | -3.371577               | 4.112286  | 0.011703  |
|     | 20            | 1             | H         | -5.201931               | 2.424337  | 0.109151  |
|     | 21            | 1             | H         | 1.867341                | -0.565113 | -0.074873 |
|     | 22            | 6             | C         | 3.069636                | -0.017507 | 0.342110  |
|     | 23            | 6             | C         | 3.479760                | -0.005641 | 1.686010  |
|     | 24            | 6             | C         | 2.655137                | -0.558273 | 2.654830  |
|     | 25            | 6             | C         | 1.615007                | -0.538694 | -1.125179 |
|     | 26            | 1             | H         | 4.431229                | 0.436187  | 1.956150  |
|     | 27            | 1             | H         | 2.949965                | -0.555294 | 3.700171  |
|     | 28            | 1             | H         | -0.398286               | 1.019573  | -0.218392 |
|     | 29            | 6             | C         | -0.671978               | -1.907191 | -1.702335 |
|     | 30            | 6             | C         | -1.285437               | -2.075356 | -0.278660 |
|     | 31            | 6             | C         | -1.778360               | -3.551641 | -0.184736 |
|     | 32            | 6             | C         | -0.682735               | -4.583425 | -0.479627 |
|     | 33            | 6             | C         | -0.100198               | -4.378769 | -1.883754 |
|     | 34            | 6             | C         | 0.410038                | -2.942257 | -2.054948 |
|     | 35            | 1             | H         | -1.502293               | -2.011318 | -2.412353 |
|     | 36            | 1             | H         | -2.225082               | -3.739837 | 0.797860  |
|     | 37            | 1             | H         | 0.115666                | -4.496427 | 0.267756  |
|     | 38            | 1             | H         | 0.708543                | -5.094477 | -2.072534 |
|     | 39            | 1             | H         | 0.741655                | -2.776758 | -3.087308 |
|     | 40            | 1             | H         | -2.581031               | -3.686529 | -0.921759 |
|     | 41            | 1             | H         | -1.097990               | -5.593820 | -0.381653 |
|     | 42            | 1             | H         | -0.880478               | -4.582395 | -2.631196 |
|     | 43            | 1             | H         | 1.291613                | -2.801685 | -1.420172 |
|     | 44            | 1             | H         | -0.299599               | -0.888108 | -1.838977 |
|     | 45            | 35            | Br        | 4.235380                | 0.757319  | -0.970454 |
|     | 46            | 35            | Br        | -0.434767               | 3.969863  | -0.177239 |
| 7fi | Center number | Atomic number | Atom type | Coordinates (Angstroms) |           |           |
|     |               |               |           | X                       | Y         | Z         |
|     | 1             | 6             | C         | 1.473021                | 0.687495  | 0.081978  |
|     | 2             | 6             | C         | 2.543294                | 1.233133  | 0.750351  |
|     | 3             | 6             | C         | 1.930249                | -0.601626 | -0.398107 |
|     | 4             | 1             | H         | 2.629215                | 2.180093  | 1.262599  |
|     | 5             | 6             | C         | -0.985940               | 0.395812  | 0.424697  |
|     | 6             | 6             | C         | -1.150220               | 0.174432  | 1.773091  |
|     | 7             | 6             | C         | -1.962089               | -0.461363 | -0.224911 |
|     | 8             | 1             | H         | -0.599363               | 0.593495  | 2.603394  |
|     | 9             | 6             | C         | -2.668796               | -1.146949 | 0.810533  |
|     | 10            | 7             | N         | -2.151828               | -0.740368 | 2.020930  |
|     | 11            | 7             | N         | 3.636968                | 0.383294  | 0.722422  |
|     | 12            | 6             | C         | 3.284101                | -0.749218 | 0.018718  |
|     | 13            | 6             | C         | 1.342630                | -1.651387 | -1.128088 |
|     | 14            | 6             | C         | 2.096211                | -2.780550 | -1.425566 |
|     | 15            | 6             | C         | 3.436041                | -2.897335 | -1.007411 |
|     | 16            | 6             | C         | 4.047141                | -1.884694 | -0.277772 |
|     | 17            | 1             | H         | 1.642569                | -3.591409 | -1.988042 |
|     | 18            | 1             | H         | 3.999201                | -3.792365 | -1.255508 |
|     | 19            | 1             | H         | 5.078786                | -1.973880 | 0.049479  |
|     | 20            | 6             | C         | -2.330111               | -0.756979 | -1.555822 |
|     | 21            | 6             | C         | -3.345095               | -1.671413 | -1.809128 |
|     | 22            | 6             | C         | -4.027665               | -2.319752 | -0.762820 |
|     | 23            | 6             | C         | -3.695734               | -2.063890 | 0.560876  |
|     | 24            | 1             | H         | -1.831440               | -0.281916 | -2.391261 |
|     | 25            | 1             | H         | -3.617402               | -1.889556 | -2.837646 |
|     | 26            | 1             | H         | -4.818140               | -3.027972 | -0.992290 |
|     | 27            | 1             | H         | -4.213514               | -2.562362 | 1.374863  |
|     | 28            | 1             | H         | 0.307856                | -1.593447 | -1.445607 |
|     | 29            | 6             | C         | -0.064787               | 1.664086  | -1.641429 |
|     | 30            | 6             | C         | 0.103312                | 1.333479  | -0.127120 |
|     | 31            | 6             | C         | 0.048096                | 2.697538  | 0.626008  |
|     | 32            | 6             | C         | -1.223756               | 3.504918  | 0.338218  |

|     |               |               |           |                         |           |           |
|-----|---------------|---------------|-----------|-------------------------|-----------|-----------|
|     | 33            | 6             | C         | -1.361046               | 3.798114  | -1.161218 |
|     | 34            | 6             | C         | -1.313262               | 2.498343  | -1.974983 |
|     | 35            | 1             | H         | 0.827032                | 2.231831  | -1.936677 |
|     | 36            | 1             | H         | 0.162836                | 2.539570  | 1.704092  |
|     | 37            | 1             | H         | -2.100413               | 2.944549  | 0.685948  |
|     | 38            | 1             | H         | -2.292631               | 4.340201  | -1.363388 |
|     | 39            | 1             | H         | -1.320256               | 2.722760  | -3.049077 |
|     | 40            | 1             | H         | 0.912327                | 3.294952  | 0.306342  |
|     | 41            | 1             | H         | -1.199669               | 4.441168  | 0.909449  |
|     | 42            | 1             | H         | -0.539502               | 4.457738  | -1.476244 |
|     | 43            | 1             | H         | -2.220236               | 1.918482  | -1.772289 |
|     | 44            | 1             | H         | -0.035655               | 0.746477  | -2.235263 |
|     | 45            | 6             | C         | -2.586884               | -1.200774 | 3.322084  |
|     | 46            | 6             | C         | 4.929501                | 0.636016  | 1.319868  |
|     | 47            | 1             | H         | -3.638212               | -0.947884 | 3.501651  |
|     | 48            | 1             | H         | -2.468982               | -2.286202 | 3.415182  |
|     | 49            | 1             | H         | -1.979332               | -0.720378 | 4.090798  |
|     | 50            | 1             | H         | 4.909691                | 1.608394  | 1.815349  |
| 7aj | 51            | 1             | H         | 5.178166                | -0.127647 | 2.066192  |
|     | 52            | 1             | H         | 5.721821                | 0.650213  | 0.562201  |
|     | Center number | Atomic number | Atom type | Coordinates (Angstroms) |           |           |
|     |               |               |           | X                       | Y         | Z         |
|     | 1             | 6             | C         | -1.649137               | -1.672157 | 0.241290  |
|     | 2             | 6             | C         | -0.569564               | -0.870696 | 0.680261  |
|     | 3             | 6             | C         | -0.311620               | -0.818664 | 2.031353  |
|     | 4             | 6             | C         | -1.135529               | -1.559649 | 2.926703  |
|     | 5             | 6             | C         | -2.192656               | -2.336957 | 2.494508  |
|     | 6             | 6             | C         | -2.484622               | -2.417663 | 1.105087  |
|     | 7             | 6             | C         | -0.756830               | -0.804097 | -1.735600 |
|     | 8             | 6             | C         | 0.110614                | -0.219859 | -0.536109 |
|     | 9             | 1             | H         | 0.507113                | -0.230639 | 2.430181  |
|     | 10            | 1             | H         | -0.918702               | -1.505728 | 3.989770  |
|     | 11            | 1             | H         | -2.799341               | -2.886071 | 3.209278  |
|     | 12            | 8             | O         | -0.549065               | -0.584080 | -2.911578 |
|     | 13            | 6             | C         | 1.549713                | -0.695158 | -0.677605 |
|     | 14            | 6             | C         | 2.013704                | -1.632012 | -1.569520 |
|     | 15            | 6             | C         | 2.685300                | -0.316902 | 0.139396  |
|     | 16            | 1             | H         | 1.489861                | -2.139825 | -2.364662 |
|     | 17            | 1             | H         | 3.926130                | -2.496691 | -1.896301 |
|     | 18            | 6             | C         | 0.001141                | 1.294758  | -0.577720 |
|     | 19            | 6             | C         | 0.874215                | 2.106913  | -1.260951 |
|     | 20            | 6             | C         | -1.052375               | 2.156628  | -0.077522 |
|     | 21            | 1             | H         | 1.778057                | 1.839795  | -1.786400 |
|     | 22            | 6             | C         | -0.727711               | 3.482143  | -0.487072 |
|     | 23            | 1             | H         | 0.931187                | 4.199863  | -1.608774 |
|     | 24            | 7             | N         | 0.446674                | 3.414722  | -1.206469 |
|     | 25            | 7             | N         | 3.354469                | -1.872988 | -1.351171 |
|     | 26            | 6             | C         | 3.797465                | -1.080308 | -0.313649 |
|     | 27            | 6             | C         | 2.889329                | 0.598212  | 1.189765  |
|     | 28            | 6             | C         | 4.151936                | 0.712501  | 1.757550  |
|     | 29            | 6             | C         | 5.233077                | -0.065662 | 1.297492  |
|     | 30            | 6             | C         | 5.070913                | -0.968293 | 0.253960  |
|     | 31            | 1             | H         | 4.312539                | 1.418845  | 2.566691  |
|     | 32            | 1             | H         | 6.208823                | 0.045901  | 1.760835  |
|     | 33            | 1             | H         | 5.903358                | -1.564264 | -0.109714 |
|     | 34            | 6             | C         | -2.233212               | 1.966413  | 0.666997  |
|     | 35            | 6             | C         | -3.026415               | 3.063040  | 0.978899  |
|     | 36            | 6             | C         | -2.675257               | 4.363822  | 0.567347  |
|     | 37            | 6             | C         | -1.520965               | 4.589439  | -0.171143 |
|     | 38            | 1             | H         | -2.525671               | 0.976958  | 0.997612  |
|     | 39            | 1             | H         | -3.937022               | 2.915642  | 1.552153  |
|     | 40            | 1             | H         | -3.315933               | 5.200770  | 0.828780  |
|     | 41            | 1             | H         | -1.245045               | 5.588940  | -0.495766 |
|     | 42            | 1             | H         | 2.074612                | 1.225826  | 1.534831  |
|     | 43            | 6             | C         | -1.820365               | -1.658664 | -1.156478 |
|     | 44            | 6             | C         | -3.522846               | -3.160421 | 0.481111  |
|     | 45            | 6             | C         | -3.686844               | -3.141846 | -0.897358 |
|     | 46            | 6             | C         | -2.834920               | -2.389886 | -1.742292 |
|     | 47            | 1             | H         | -4.198304               | -3.751061 | 1.094796  |
|     | 48            | 1             | H         | -4.491695               | -3.720930 | -1.340592 |
|     | 49            | 1             | H         | -2.974686               | -2.386702 | -2.818812 |

|     |                  |                  |           |                         |           |           |
|-----|------------------|------------------|-----------|-------------------------|-----------|-----------|
|     |                  |                  |           |                         |           |           |
| 7cj | Center<br>number | Atomic<br>number | Atom type | Coordinates (Angstroms) |           |           |
|     |                  |                  |           | X                       | Y         | Z         |
|     | 1                | 6                | C         | -1.663766               | -1.884468 | 0.471359  |
|     | 2                | 6                | C         | -0.562236               | -1.011238 | 0.630524  |
|     | 3                | 6                | C         | -0.208371               | -0.645121 | 1.909558  |
|     | 4                | 6                | C         | -0.957797               | -1.150531 | 3.010866  |
|     | 5                | 6                | C         | -2.035564               | -2.000449 | 2.851106  |
|     | 6                | 6                | C         | -2.427148               | -2.401457 | 1.543999  |
|     | 7                | 6                | C         | -0.930812               | -1.501269 | -1.714070 |
|     | 8                | 6                | C         | 0.018765                | -0.663923 | -0.751124 |
|     | 9                | 1                | H         | 0.629503                | 0.015956  | 2.098985  |
|     | 10               | 1                | H         | -0.664262               | -0.851475 | 4.013145  |
|     | 11               | 1                | H         | -2.581939               | -2.364197 | 3.717036  |
|     | 12               | 8                | O         | -0.816616               | -1.560915 | -2.921527 |
|     | 13               | 6                | C         | 1.446581                | -1.173824 | -0.887690 |
|     | 14               | 6                | C         | 1.847933                | -2.294354 | -1.576692 |
|     | 15               | 6                | C         | 2.638346                | -0.634894 | -0.262742 |
|     | 16               | 1                | H         | 1.266259                | -2.960297 | -2.195482 |
|     | 17               | 1                | H         | 3.731634                | -3.233483 | -1.848388 |
|     | 18               | 6                | C         | -0.107396               | 0.802474  | -1.127281 |
|     | 19               | 6                | C         | 0.716510                | 1.438887  | -2.027922 |
|     | 20               | 6                | C         | -1.135870               | 1.757302  | -0.768504 |
|     | 21               | 1                | H         | 1.590416                | 1.057023  | -2.532658 |
|     | 22               | 6                | C         | -0.849729               | 2.952837  | -1.479378 |
|     | 23               | 1                | H         | 0.738321                | 3.402920  | -2.825744 |
|     | 24               | 7                | N         | 0.280046                | 2.724262  | -2.240911 |
|     | 25               | 7                | N         | 3.199565                | -2.500717 | -1.409900 |
|     | 26               | 6                | C         | 3.716127                | -1.496277 | -0.613021 |
|     | 27               | 6                | C         | 2.906693                | 0.489238  | 0.533546  |
|     | 28               | 6                | C         | 4.209256                | 0.720721  | 0.973339  |
|     | 29               | 6                | C         | 5.262109                | -0.152260 | 0.623984  |
|     | 30               | 6                | C         | 5.019267                | -1.265612 | -0.176401 |
|     | 31               | 1                | H         | 6.271100                | 0.035978  | 0.969129  |
|     | 32               | 1                | H         | 5.832692                | -1.931645 | -0.449997 |
|     | 33               | 6                | C         | -2.266569               | 1.724549  | 0.077354  |
|     | 34               | 6                | C         | -3.052111               | 2.866173  | 0.191268  |
|     | 35               | 6                | C         | -2.740536               | 4.047842  | -0.521174 |
|     | 36               | 6                | C         | -1.641140               | 4.100461  | -1.360172 |
|     | 37               | 1                | H         | -2.509847               | 0.826395  | 0.626363  |
|     | 38               | 1                | H         | -3.389041               | 4.907416  | -0.391387 |
|     | 39               | 1                | H         | -1.405741               | 5.007704  | -1.909403 |
|     | 40               | 1                | H         | 2.133442                | 1.201463  | 0.796081  |
|     | 41               | 6                | C         | -1.939659               | -2.192116 | -0.874878 |
|     | 42               | 6                | C         | -3.501905               | -3.260234 | 1.187911  |
|     | 43               | 6                | C         | -3.767878               | -3.559857 | -0.141340 |
|     | 44               | 6                | C         | -2.988478               | -3.030044 | -1.198434 |
|     | 45               | 1                | H         | -4.124214               | -3.687638 | 1.970146  |
|     | 46               | 1                | H         | -4.597832               | -4.219473 | -0.377439 |
|     | 47               | 1                | H         | -3.208719               | -3.273638 | -2.233142 |
|     | 48               | 8                | O         | -4.171290               | 2.958544  | 0.982196  |
|     | 49               | 8                | O         | 4.378125                | 1.843699  | 1.747786  |
|     | 50               | 6                | C         | -4.552198               | 1.814667  | 1.724395  |
|     | 51               | 6                | C         | 5.676989                | 2.146814  | 2.220161  |
|     | 52               | 1                | H         | -3.770207               | 1.507336  | 2.431522  |
|     | 53               | 1                | H         | -5.447962               | 2.098060  | 2.280138  |
|     | 54               | 1                | H         | -4.787408               | 0.964360  | 1.070343  |
|     | 55               | 1                | H         | 6.384363                | 2.316918  | 1.397131  |
|     | 56               | 1                | H         | 5.580450                | 3.066042  | 2.800709  |
|     | 57               | 1                | H         | 6.073491                | 1.354617  | 2.869666  |
| 7dj | Center<br>number | Atomic<br>number | Atom type | Coordinates (Angstroms) |           |           |
|     |                  |                  |           | X                       | Y         | Z         |
|     | 1                | 6                | C         | -2.116191               | -1.245871 | 0.354204  |
|     | 2                | 6                | C         | -0.889770               | -0.707178 | 0.802631  |
|     | 3                | 6                | C         | -0.671947               | -0.625478 | 2.159364  |
|     | 4                | 6                | C         | -1.699412               | -1.047104 | 3.050920  |
|     | 5                | 6                | C         | -2.911530               | -1.544981 | 2.609004  |
|     | 6                | 6                | C         | -3.155979               | -1.669202 | 1.213588  |
|     | 7                | 6                | C         | -0.894453               | -0.899565 | -1.607890 |
|     | 8                | 6                | C         | -0.013252               | -0.351794 | -0.407075 |

|     |               |               |           |                         |           |           |
|-----|---------------|---------------|-----------|-------------------------|-----------|-----------|
|     | 9             | 1             | H         | 0.259969                | -0.239006 | 2.558673  |
|     | 10            | 1             | H         | -1.519728               | -0.966973 | 4.119291  |
|     | 11            | 1             | H         | -3.672332               | -1.849651 | 3.322345  |
|     | 12            | 8             | O         | -0.555369               | -0.938214 | -2.775968 |
|     | 13            | 6             | C         | 1.341070                | -1.038516 | -0.282434 |
|     | 14            | 6             | C         | 1.696736                | -2.297615 | -0.731751 |
|     | 15            | 6             | C         | 2.475048                | -0.524455 | 0.459267  |
|     | 16            | 1             | H         | 3.490062                | -3.415955 | -0.542808 |
|     | 17            | 6             | C         | 0.100873                | 1.157109  | -0.664781 |
|     | 18            | 6             | C         | 0.957184                | 1.721361  | -1.597858 |
|     | 19            | 6             | C         | -0.676395               | 2.245759  | -0.095784 |
|     | 20            | 6             | C         | -0.210275               | 3.444944  | -0.708063 |
|     | 21            | 1             | H         | 1.277838                | 3.725030  | -2.198009 |
|     | 22            | 7             | N         | 0.773596                | 3.089071  | -1.601413 |
|     | 23            | 7             | N         | 2.995659                | -2.564886 | -0.329682 |
|     | 24            | 6             | C         | 3.497482                | -1.510632 | 0.398715  |
|     | 25            | 6             | C         | 2.734903                | 0.656356  | 1.183643  |
|     | 26            | 6             | C         | 3.970644                | 0.818449  | 1.799210  |
|     | 27            | 6             | C         | 4.968291                | -0.172321 | 1.713616  |
|     | 28            | 6             | C         | 4.743281                | -1.350890 | 1.012245  |
|     | 29            | 1             | H         | 4.172103                | 1.727805  | 2.357894  |
|     | 30            | 1             | H         | 5.924314                | -0.015611 | 2.204267  |
|     | 31            | 1             | H         | 5.505557                | -2.122446 | 0.946907  |
|     | 32            | 6             | C         | -1.720478               | 2.366536  | 0.845874  |
|     | 33            | 6             | C         | -2.236110               | 3.622116  | 1.143846  |
|     | 34            | 6             | C         | -1.743369               | 4.787732  | 0.527931  |
|     | 35            | 6             | C         | -0.722337               | 4.710285  | -0.410133 |
|     | 36            | 1             | H         | -2.129857               | 1.495734  | 1.339557  |
|     | 37            | 1             | H         | -3.040364               | 3.704417  | 1.869282  |
|     | 38            | 1             | H         | -2.166806               | 5.754226  | 0.784360  |
|     | 39            | 1             | H         | -0.335322               | 5.599752  | -0.899870 |
|     | 40            | 1             | H         | 1.980821                | 1.431890  | 1.257708  |
|     | 41            | 6             | C         | -2.195269               | -1.346450 | -1.048550 |
|     | 42            | 6             | C         | -4.318504               | -2.181602 | 0.576407  |
|     | 43            | 6             | C         | -4.397203               | -2.265038 | -0.807211 |
|     | 44            | 6             | C         | -3.330534               | -1.857545 | -1.645887 |
|     | 45            | 1             | H         | -5.155216               | -2.518193 | 1.183275  |
|     | 46            | 1             | H         | -5.300187               | -2.663669 | -1.260340 |
|     | 47            | 1             | H         | -3.401271               | -1.948635 | -2.725281 |
|     | 48            | 6             | C         | 1.979944                | 1.124453  | -2.514374 |
|     | 49            | 6             | C         | 0.961577                | -3.339845 | -1.520481 |
|     | 50            | 1             | H         | 2.946093                | 1.001385  | -2.011604 |
|     | 51            | 1             | H         | 1.648285                | 0.150547  | -2.871364 |
|     | 52            | 1             | H         | 2.131326                | 1.771134  | -3.385984 |
|     | 53            | 1             | H         | 1.465281                | -4.308133 | -1.434931 |
|     | 54            | 1             | H         | -0.060449               | -3.473172 | -1.156310 |
|     | 55            | 1             | H         | 0.893896                | -3.078175 | -2.580802 |
| 7ej | Center number | Atomic number | Atom type | Coordinates (Angstroms) |           |           |
|     |               |               |           | X                       | Y         | Z         |
|     | 1             | 6             | C         | -1.476926               | 2.283277  | -0.720060 |
|     | 2             | 6             | C         | -0.430620               | 1.332220  | -0.691297 |
|     | 3             | 6             | C         | -0.090025               | 0.709095  | -1.870477 |
|     | 4             | 6             | C         | -0.799447               | 1.037437  | -3.061600 |
|     | 5             | 6             | C         | -1.824280               | 1.963249  | -3.084762 |
|     | 6             | 6             | C         | -2.199608               | 2.628679  | -1.885357 |
|     | 7             | 6             | C         | -0.783632               | 2.288705  | 1.510067  |
|     | 8             | 6             | C         | 0.116299                | 1.222032  | 0.741949  |
|     | 9             | 1             | H         | 0.706139                | -0.025337 | -1.917366 |
|     | 10            | 1             | H         | -0.520051               | 0.533605  | -3.982252 |
|     | 11            | 1             | H         | -2.344541               | 2.183314  | -4.012682 |
|     | 12            | 8             | O         | -0.665230               | 2.570655  | 2.685224  |
|     | 13            | 6             | C         | 1.573914                | 1.652865  | 0.811939  |
|     | 14            | 6             | C         | 2.047503                | 2.857027  | 1.276388  |
|     | 15            | 6             | C         | 2.731458                | 0.922007  | 0.340440  |
|     | 16            | 1             | H         | 1.509773                | 3.672559  | 1.734851  |
|     | 17            | 1             | H         | 3.992463                | 3.700953  | 1.397277  |
|     | 18            | 6             | C         | -0.110167               | -0.131064 | 1.393682  |
|     | 19            | 6             | C         | 0.644067                | -0.620063 | 2.434179  |
|     | 20            | 6             | C         | -1.186173               | -1.080455 | 1.192737  |
|     | 21            | 1             | H         | 1.524079                | -0.194286 | 2.891026  |
|     | 22            | 6             | C         | -0.996484               | -2.126295 | 2.141258  |

|     |               |               |           |                         |           |           |
|-----|---------------|---------------|-----------|-------------------------|-----------|-----------|
|     | 23            | 1             | H         | 0.518604                | -2.380837 | 3.611572  |
|     | 24            | 7             | N         | 0.122057                | -1.812183 | 2.881637  |
|     | 25            | 7             | N         | 3.414451                | 2.928581  | 1.109830  |
|     | 26            | 6             | C         | 3.865708                | 1.757221  | 0.542244  |
|     | 27            | 6             | C         | 2.927603                | -0.358384 | -0.210481 |
|     | 28            | 6             | C         | 4.216731                | -0.737593 | -0.548295 |
|     | 29            | 6             | C         | 5.331066                | 0.098948  | -0.357117 |
|     | 30            | 6             | C         | 5.161133                | 1.360701  | 0.197439  |
|     | 31            | 1             | H         | 6.317621                | -0.248558 | -0.639582 |
|     | 32            | 1             | H         | 6.014228                | 2.013546  | 0.356922  |
|     | 33            | 6             | C         | -2.288379               | -1.162875 | 0.319368  |
|     | 34            | 6             | C         | -3.127508               | -2.260132 | 0.422455  |
|     | 35            | 6             | C         | -2.926914               | -3.291887 | 1.356253  |
|     | 36            | 6             | C         | -1.849566               | -3.229755 | 2.229252  |
|     | 37            | 1             | H         | -2.485581               | -0.397798 | -0.418999 |
|     | 38            | 1             | H         | -3.615130               | -4.127943 | 1.389809  |
|     | 39            | 1             | H         | -1.681995               | -4.016714 | 2.958648  |
|     | 40            | 1             | H         | 2.100279                | -1.043224 | -0.347684 |
|     | 41            | 6             | C         | -1.741395               | 2.861066  | 0.537090  |
|     | 42            | 6             | C         | -3.222767               | 3.600461  | -1.719716 |
|     | 43            | 6             | C         | -3.478916               | 4.165605  | -0.477691 |
|     | 44            | 6             | C         | -2.739580               | 3.805869  | 0.674853  |
|     | 45            | 1             | H         | -3.814297               | 3.902885  | -2.579971 |
|     | 46            | 1             | H         | -4.269951               | 4.904115  | -0.387295 |
|     | 47            | 1             | H         | -2.951373               | 4.257127  | 1.639138  |
|     | 48            | 35            | Br        | 4.506885                | -2.479931 | -1.299787 |
|     | 49            | 35            | Br        | -4.635243               | -2.388675 | -0.759754 |
| 7fj | Center number | Atomic number | Atom type | Coordinates (Angstroms) |           |           |
|     |               |               |           | X                       | Y         | Z         |
|     | 1             | 6             | C         | -1.526324               | -2.053328 | 0.188046  |
|     | 2             | 6             | C         | -0.644849               | -1.092927 | 0.736742  |
|     | 3             | 6             | C         | -0.504391               | -1.053057 | 2.105466  |
|     | 4             | 6             | C         | -1.247804               | -1.964975 | 2.908680  |
|     | 5             | 6             | C         | -2.112402               | -2.897809 | 2.369224  |
|     | 6             | 6             | C         | -2.278200               | -2.970255 | 0.958737  |
|     | 7             | 6             | C         | -0.653535               | -0.959848 | -1.683133 |
|     | 8             | 6             | C         | -0.002586               | -0.280255 | -0.400280 |
|     | 9             | 1             | H         | 0.162656                | -0.346688 | 2.586439  |
|     | 10            | 1             | H         | -1.125997               | -1.918483 | 3.987147  |
|     | 11            | 1             | H         | -2.663616               | -3.574902 | 3.015929  |
|     | 12            | 8             | O         | -0.397390               | -0.660165 | -2.831830 |
|     | 13            | 6             | C         | 1.505686                | -0.480941 | -0.433638 |
|     | 14            | 6             | C         | 2.202934                | -1.282218 | -1.305958 |
|     | 15            | 6             | C         | 2.487305                | 0.061070  | 0.481188  |
|     | 16            | 1             | H         | 1.843209                | -1.844934 | -2.154441 |
|     | 17            | 6             | C         | -0.385985               | 1.189738  | -0.408502 |
|     | 18            | 6             | C         | 0.369681                | 2.175794  | -0.996621 |
|     | 19            | 6             | C         | -1.612919               | 1.826547  | 0.023496  |
|     | 20            | 1             | H         | 1.345055                | 2.098383  | -1.453220 |
|     | 21            | 6             | C         | -1.501964               | 3.203973  | -0.326834 |
|     | 22            | 7             | N         | -0.283865               | 3.388630  | -0.950983 |
|     | 23            | 7             | N         | 3.548924                | -1.292725 | -0.995957 |
|     | 24            | 6             | C         | 3.749811                | -0.473937 | 0.097485  |
|     | 25            | 6             | C         | 2.443245                | 0.953762  | 1.568088  |
|     | 26            | 6             | C         | 3.618848                | 1.268654  | 2.238850  |
|     | 27            | 6             | C         | 4.853924                | 0.715979  | 1.846557  |
|     | 28            | 6             | C         | 4.936509                | -0.158084 | 0.769007  |
|     | 29            | 1             | H         | 3.587848                | 1.958446  | 3.077174  |
|     | 30            | 1             | H         | 5.756105                | 0.981282  | 2.389732  |
|     | 31            | 1             | H         | 5.889305                | -0.577524 | 0.460328  |
|     | 32            | 6             | C         | -2.792644               | 1.399481  | 0.662633  |
|     | 33            | 6             | C         | -3.793585               | 2.323865  | 0.934929  |
|     | 34            | 6             | C         | -3.653316               | 3.681122  | 0.586461  |
|     | 35            | 6             | C         | -2.505233               | 4.138663  | -0.048512 |
|     | 36            | 1             | H         | -2.925260               | 0.361525  | 0.943816  |
|     | 37            | 1             | H         | -4.703590               | 1.993512  | 1.427298  |
|     | 38            | 1             | H         | -4.452989               | 4.379362  | 0.815399  |
|     | 39            | 1             | H         | -2.394056               | 5.183865  | -0.320980 |
|     | 40            | 1             | H         | 1.504558                | 1.410509  | 1.863358  |
|     | 41            | 6             | C         | -1.589303               | -2.011542 | -1.218200 |
|     | 42            | 6             | C         | -3.115745               | -3.857528 | 0.230521  |

|         |                  |                  |           |                         |           |           |
|---------|------------------|------------------|-----------|-------------------------|-----------|-----------|
|         | 43               | 6                | C         | -3.174287               | -3.810146 | -1.155736 |
|         | 44               | 6                | C         | -2.408447               | -2.884999 | -1.906037 |
|         | 45               | 1                | H         | -3.719508               | -4.583279 | 0.769496  |
|         | 46               | 1                | H         | -3.826114               | -4.502864 | -1.680047 |
|         | 47               | 1                | H         | -2.463502               | -2.861449 | -2.989957 |
|         | 48               | 6                | C         | 0.228739                | 4.651016  | -1.440175 |
|         | 49               | 6                | C         | 4.582426                | -2.006268 | -1.716245 |
|         | 50               | 1                | H         | 1.195982                | 4.481247  | -1.915577 |
|         | 51               | 1                | H         | -0.450283               | 5.087535  | -2.180806 |
|         | 52               | 1                | H         | 0.362868                | 5.369544  | -0.623251 |
|         | 53               | 1                | H         | 5.108781                | -2.706007 | -1.057521 |
|         | 54               | 1                | H         | 4.123281                | -2.573702 | -2.527229 |
|         | 55               | 1                | H         | 5.315430                | -1.314699 | -2.147300 |
|         |                  |                  |           |                         |           |           |
| 7<br>gi | Center<br>number | Atomic<br>number | Atom type | Coordinates (Angstroms) |           |           |
|         |                  |                  |           | X                       | Y         | Z         |
|         | 1                | 6                | C         | -1.421986               | 2.428491  | -0.705596 |
|         | 2                | 6                | C         | -0.471009               | 1.383320  | -0.762155 |
|         | 3                | 6                | C         | -0.227147               | 0.795828  | -1.982861 |
|         | 4                | 6                | C         | -0.937165               | 1.253714  | -3.130013 |
|         | 5                | 6                | C         | -1.868930               | 2.271752  | -3.069962 |
|         | 6                | 6                | C         | -2.142862               | 2.903278  | -1.825645 |
|         | 7                | 6                | C         | -0.663163               | 2.247519  | 1.495883  |
|         | 8                | 6                | C         | 0.105883                | 1.144157  | 0.643323  |
|         | 9                | 1                | H         | 0.493402                | -0.006601 | -2.094636 |
|         | 10               | 1                | H         | -0.735043               | 0.776676  | -4.084562 |
|         | 11               | 1                | H         | -2.393206               | 2.589840  | -3.966694 |
|         | 12               | 8                | O         | -0.482646               | 2.454419  | 2.678924  |
|         | 13               | 6                | C         | 1.599617                | 1.430089  | 0.683938  |
|         | 14               | 6                | C         | 2.203268                | 2.556993  | 1.190492  |
|         | 15               | 6                | C         | 2.666990                | 0.622626  | 0.137334  |
|         | 16               | 1                | H         | 1.759906                | 3.394549  | 1.707951  |
|         | 17               | 6                | C         | -0.231690               | -0.215344 | 1.230377  |
|         | 18               | 6                | C         | 0.500776                | -0.832689 | 2.217213  |
|         | 19               | 6                | C         | -1.399061               | -1.044652 | 1.022766  |
|         | 20               | 1                | H         | 1.432723                | -0.518626 | 2.662927  |
|         | 21               | 6                | C         | -1.277793               | -2.152056 | 1.912135  |
|         | 22               | 7                | N         | -0.110690               | -1.995621 | 2.631226  |
|         | 23               | 7                | N         | 3.568396                | 2.519915  | 0.988241  |
|         | 24               | 6                | C         | 3.879306                | 1.340275  | 0.344367  |
|         | 25               | 6                | C         | 2.726658                | -0.637868 | -0.484625 |
|         | 26               | 6                | C         | 3.965077                | -1.114995 | -0.884388 |
|         | 27               | 6                | C         | 5.157382                | -0.396218 | -0.687752 |
|         | 28               | 6                | C         | 5.122099                | 0.844414  | -0.063378 |
|         | 29               | 1                | H         | 6.098710                | -0.817205 | -1.020317 |
|         | 30               | 1                | H         | 6.038251                | 1.403213  | 0.099749  |
|         | 31               | 6                | C         | -2.531529               | -0.976509 | 0.189032  |
|         | 32               | 6                | C         | -3.468578               | -1.994143 | 0.269433  |
|         | 33               | 6                | C         | -3.337053               | -3.088057 | 1.142035  |
|         | 34               | 6                | C         | -2.229826               | -3.174330 | 1.975809  |
|         | 35               | 1                | H         | -2.678450               | -0.158429 | -0.502923 |
|         | 36               | 1                | H         | -4.100506               | -3.856600 | 1.159503  |
|         | 37               | 1                | H         | -2.117134               | -4.013299 | 2.655185  |
|         | 38               | 1                | H         | 1.835145                | -1.235135 | -0.629350 |
|         | 39               | 6                | C         | -1.591840               | 2.959159  | 0.588154  |
|         | 40               | 6                | C         | -3.062817               | 3.956522  | -1.574462 |
|         | 41               | 6                | C         | -3.226144               | 4.474659  | -0.296798 |
|         | 42               | 6                | C         | -2.490302               | 3.984719  | 0.809141  |
|         | 43               | 1                | H         | -3.648321               | 4.359673  | -2.396716 |
|         | 44               | 1                | H         | -3.939792               | 5.278245  | -0.140842 |
|         | 45               | 1                | H         | -2.628830               | 4.400773  | 1.802161  |
|         | 46               | 6                | C         | 0.399101                | -2.921154 | 3.622609  |
|         | 47               | 6                | C         | 4.520271                | 3.526526  | 1.412487  |
|         | 48               | 1                | H         | 1.319076                | -2.515733 | 4.045983  |
|         | 49               | 1                | H         | -0.324316               | -3.060798 | 4.432975  |
|         | 50               | 1                | H         | 0.620616                | -3.897260 | 3.176670  |
|         | 51               | 1                | H         | 5.076246                | 3.925244  | 0.556976  |
|         | 52               | 1                | H         | 3.980641                | 4.347117  | 1.887349  |
|         | 53               | 1                | H         | 5.234934                | 3.115895  | 2.134543  |
|         | 54               | 35               | Br        | -5.019956               | -1.916874 | -0.860048 |
|         | 55               | 35               | Br        | 4.069327                | -2.833786 | -1.733294 |

|     | Center number | Atomic number | Atom type | Coordinates (Angstroms) |           |           |
|-----|---------------|---------------|-----------|-------------------------|-----------|-----------|
|     |               |               |           | X                       | Y         | Z         |
| 7gk | 1             | 6             | C         | -1.683440               | 1.892900  | -2.576139 |
|     | 2             | 6             | C         | -2.384927               | 3.074975  | -2.776997 |
|     | 3             | 6             | C         | -2.350311               | 4.064503  | -1.789605 |
|     | 4             | 6             | C         | -1.609505               | 3.877701  | -0.626086 |
|     | 5             | 6             | C         | -0.884850               | 2.693217  | -0.408282 |
|     | 6             | 6             | C         | -0.954921               | 1.689629  | -1.397080 |
|     | 7             | 6             | C         | -0.038824               | 2.482137  | 0.788190  |
|     | 8             | 6             | C         | 0.463981                | 1.196325  | 1.090678  |
|     | 9             | 6             | C         | 0.115891                | -0.032140 | 0.226695  |
|     | 10            | 6             | C         | -0.246494               | 0.394166  | -1.224056 |
|     | 11            | 6             | C         | 0.303819                | 3.555078  | 1.631579  |
|     | 12            | 6             | C         | 1.087033                | 3.368883  | 2.764915  |
|     | 13            | 6             | C         | 1.554958                | 2.092472  | 3.076350  |
|     | 14            | 6             | C         | 1.244964                | 1.023637  | 2.238720  |
|     | 15            | 8             | O         | -0.041630               | -0.345806 | -2.172158 |
|     | 16            | 6             | C         | 1.268272                | -1.020002 | 0.193785  |
|     | 17            | 6             | C         | 2.580575                | -0.790340 | -0.369600 |
|     | 18            | 6             | C         | 3.343411                | -1.968840 | -0.147447 |
|     | 19            | 7             | N         | 2.531632                | -2.859398 | 0.525528  |
|     | 20            | 6             | C         | 1.290916                | -2.285524 | 0.723310  |
|     | 21            | 6             | C         | 3.189189                | 0.289177  | -1.032713 |
|     | 22            | 6             | C         | 4.507751                | 0.170215  | -1.452303 |
|     | 23            | 6             | C         | 5.241786                | -1.011019 | -1.224201 |
|     | 24            | 6             | C         | 4.670854                | -2.095304 | -0.568775 |
|     | 25            | 1             | H         | 2.637771                | 1.205769  | -1.217780 |
|     | 26            | 1             | H         | 4.983244                | 0.999577  | -1.967401 |
|     | 27            | 1             | H         | 6.270582                | -1.075502 | -1.566053 |
|     | 28            | 1             | H         | 5.234889                | -3.006733 | -0.390947 |
|     | 29            | 1             | H         | 2.782179                | -3.798962 | 0.784590  |
|     | 30            | 1             | H         | 1.337478                | 4.217451  | 3.394654  |
|     | 31            | 1             | H         | -0.029150               | 4.557534  | 1.386948  |
|     | 32            | 1             | H         | 2.169836                | 1.930345  | 3.956696  |
|     | 33            | 1             | H         | -1.610330               | 4.660989  | 0.123456  |
|     | 34            | 1             | H         | -2.904864               | 4.988572  | -1.926210 |
|     | 35            | 1             | H         | -2.960647               | 3.224908  | -3.685113 |
|     | 36            | 1             | H         | -1.686714               | 1.097265  | -3.313386 |
|     | 37            | 6             | C         | -1.174625               | -0.668741 | 0.760786  |
|     | 38            | 6             | C         | -1.910078               | -1.793921 | 0.211209  |
|     | 39            | 6             | C         | -1.885259               | -0.244175 | 1.859528  |
|     | 40            | 6             | C         | -3.046982               | -1.989831 | 1.043278  |
|     | 41            | 1             | H         | -1.674715               | 0.568096  | 2.537877  |
|     | 42            | 1             | H         | -3.678593               | -0.919358 | 2.771459  |
|     | 43            | 7             | N         | -3.001821               | -1.031017 | 2.034759  |
|     | 44            | 1             | H         | 1.622009                | 0.032638  | 2.465144  |
|     | 45            | 1             | H         | 0.505058                | -2.832318 | 1.221151  |
|     | 46            | 6             | C         | -1.724998               | -2.659471 | -0.885032 |
|     | 47            | 6             | C         | -3.983750               | -3.003861 | 0.817806  |
|     | 48            | 6             | C         | -2.654745               | -3.665991 | -1.112457 |
|     | 49            | 6             | C         | -3.772575               | -3.839226 | -0.271482 |
|     | 50            | 1             | H         | -0.873438               | -2.527774 | -1.541430 |
|     | 51            | 1             | H         | -2.519819               | -4.333779 | -1.958252 |
|     | 52            | 1             | H         | -4.480177               | -4.636843 | -0.477900 |
|     | 53            | 1             | H         | -4.842919               | -3.132292 | 1.470305  |
| 7ck | Center number | Atomic number | Atom type | Coordinates (Angstroms) |           |           |
|     |               |               |           | X                       | Y         | Z         |
|     | 1             | 6             | C         | 0.801850                | 2.121179  | 2.832861  |
|     | 2             | 6             | C         | 0.940194                | 3.405791  | 3.342820  |
|     | 3             | 6             | C         | 0.537295                | 4.495205  | 2.564268  |
|     | 4             | 6             | C         | -0.011125               | 4.297388  | 1.300422  |
|     | 5             | 6             | C         | -0.168899               | 3.005152  | 0.770448  |
|     | 6             | 6             | C         | 0.271677                | 1.916829  | 1.552446  |
|     | 7             | 6             | C         | -0.800550               | 2.752274  | -0.544305 |
|     | 8             | 6             | C         | -0.713596               | 1.476387  | -1.145737 |
|     | 9             | 6             | C         | 0.074356                | 0.324667  | -0.490807 |
|     | 10            | 6             | C         | 0.173023                | 0.522248  | 1.047828  |
|     | 11            | 6             | C         | -1.519726               | 3.762757  | -1.208848 |
|     | 12            | 6             | C         | -2.106896               | 3.542813  | -2.449485 |
|     | 13            | 6             | C         | -1.991884               | 2.290879  | -3.053291 |
|     | 14            | 6             | C         | -1.303985               | 1.272538  | -2.397753 |

|      |               |               |           |                         |           |           |
|------|---------------|---------------|-----------|-------------------------|-----------|-----------|
|      | 15            | 6             | C         | 0.262190                | -0.431147 | 1.805268  |
|      | 16            | 6             | C         | -0.568692               | -1.016862 | -0.792048 |
|      | 17            | 6             | C         | -1.880805               | -1.455931 | -0.368719 |
|      | 18            | 6             | C         | -2.077302               | -2.758300 | -0.904778 |
|      | 19            | 7             | N         | -0.940517               | -3.082485 | -1.624199 |
|      | 20            | 6             | C         | -0.044799               | -2.036240 | -1.547724 |
|      | 21            | 6             | C         | -2.899679               | -0.875529 | 0.397856  |
|      | 22            | 6             | C         | -4.074896               | -1.591053 | 0.620684  |
|      | 23            | 6             | C         | -4.250894               | -2.885345 | 0.085399  |
|      | 24            | 6             | C         | -3.250414               | -3.476478 | -0.683003 |
|      | 25            | 1             | H         | -2.804564               | 0.115056  | 0.828417  |
|      | 26            | 1             | H         | -5.166844               | -3.434439 | 0.265087  |
|      | 27            | 1             | H         | -3.391581               | -4.472039 | -1.094261 |
|      | 28            | 1             | H         | -0.769596               | -3.958547 | -2.088175 |
|      | 29            | 1             | H         | -2.658671               | 4.341729  | -2.935958 |
|      | 30            | 1             | H         | -1.641900               | 4.732250  | -0.739026 |
|      | 31            | 1             | H         | -2.446788               | 2.101792  | -4.021142 |
|      | 32            | 1             | H         | -0.305528               | 5.163774  | 0.719041  |
|      | 33            | 1             | H         | 0.651624                | 5.506655  | 2.943750  |
|      | 34            | 1             | H         | 1.364618                | 3.562752  | 4.329666  |
|      | 35            | 1             | H         | 1.105919                | 1.248334  | 3.400441  |
|      | 36            | 6             | C         | 1.533175                | 0.384880  | -0.964973 |
|      | 37            | 6             | C         | 2.642521                | -0.449235 | -0.543372 |
|      | 38            | 6             | C         | 2.050734                | 1.287635  | -1.868691 |
|      | 39            | 6             | C         | 3.788619                | 0.005500  | -1.243675 |
|      | 40            | 1             | H         | 1.551082                | 2.078516  | -2.406361 |
|      | 41            | 1             | H         | 3.996585                | 1.590791  | -2.653420 |
|      | 42            | 7             | N         | 3.395756                | 1.063830  | -2.041784 |
|      | 43            | 1             | H         | -1.227779               | 0.291552  | -2.853134 |
|      | 44            | 1             | H         | 0.917257                | -2.098394 | -2.032786 |
|      | 45            | 6             | C         | 2.766718                | -1.535311 | 0.349579  |
|      | 46            | 6             | C         | 5.045317                | -0.589048 | -1.079793 |
|      | 47            | 6             | C         | 4.018406                | -2.117994 | 0.514998  |
|      | 48            | 6             | C         | 5.148969                | -1.650410 | -0.197440 |
|      | 49            | 1             | H         | 1.898253                | -1.877578 | 0.894028  |
|      | 50            | 1             | H         | 6.098500                | -2.146676 | -0.028229 |
|      | 51            | 1             | H         | 5.915310                | -0.232576 | -1.623995 |
|      | 52            | 8             | O         | -5.021771               | -0.948263 | 1.382445  |
|      | 53            | 8             | O         | 4.272565                | -3.170237 | 1.357313  |
|      | 54            | 6             | C         | -6.232412               | -1.623864 | 1.661718  |
|      | 55            | 6             | C         | 3.193540                | -3.668220 | 2.131265  |
|      | 56            | 1             | H         | -6.823863               | -0.942976 | 2.276641  |
|      | 57            | 1             | H         | -6.794265               | -1.857089 | 0.746809  |
|      | 58            | 1             | H         | -6.064426               | -2.554619 | 2.220534  |
|      | 59            | 1             | H         | 2.393337                | -4.074378 | 1.498629  |
|      | 60            | 1             | H         | 3.607089                | -4.469217 | 2.746534  |
|      | 61            | 1             | H         | 2.766635                | -2.892743 | 2.779673  |
| 10aa | Center number | Atomic number | Atom type | Coordinates (Angstroms) |           |           |
|      |               |               |           | X                       | Y         | Z         |
|      | 1             | 6             | C         | -2.816373               | -1.489906 | -1.313550 |
|      | 2             | 6             | C         | -3.998311               | -0.749130 | -1.148010 |
|      | 3             | 6             | C         | -4.685631               | -0.305893 | -2.267941 |
|      | 4             | 6             | C         | -4.191204               | -0.606997 | -3.545421 |
|      | 5             | 6             | C         | -3.018574               | -1.346347 | -3.691983 |
|      | 6             | 6             | C         | -2.310820               | -1.800860 | -2.572226 |
|      | 7             | 6             | C         | -3.093401               | -1.387519 | 0.971540  |
|      | 8             | 6             | C         | -4.292929               | -0.596124 | 0.347690  |
|      | 9             | 1             | H         | -5.601889               | 0.263123  | -2.162890 |
|      | 10            | 1             | H         | -4.726227               | -0.259934 | -4.423746 |
|      | 11            | 1             | H         | -2.643039               | -1.574594 | -4.685106 |
|      | 12            | 1             | H         | -1.398854               | -2.376553 | -2.689966 |
|      | 13            | 8             | O         | -2.884755               | -1.588148 | 2.154333  |
|      | 14            | 6             | C         | -5.596248               | -1.280942 | 0.736161  |
|      | 15            | 6             | C         | -5.709303               | -2.480257 | 1.397114  |
|      | 16            | 6             | C         | -6.948077               | -0.854458 | 0.434689  |
|      | 17            | 1             | H         | -4.934725               | -3.099037 | 1.823282  |
|      | 18            | 1             | H         | -7.376341               | -3.659328 | 1.980244  |
|      | 19            | 6             | C         | -4.211934               | 0.835474  | 0.853829  |
|      | 20            | 6             | C         | -4.957866               | 1.343799  | 1.889006  |
|      | 21            | 6             | C         | -3.263275               | 1.867651  | 0.485806  |
|      | 22            | 1             | H         | -5.753019               | 0.875471  | 2.447942  |

|    |   |   |            |           |           |
|----|---|---|------------|-----------|-----------|
| 23 | 6 | C | -3.513447  | 2.979043  | 1.339473  |
| 24 | 1 | H | -4.957238  | 3.218123  | 2.884887  |
| 25 | 7 | N | -2.287790  | -1.837251 | -0.059722 |
| 26 | 7 | N | -4.552290  | 2.628396  | 2.177036  |
| 27 | 7 | N | -7.036474  | -2.837347 | 1.509262  |
| 28 | 6 | C | -7.821931  | -1.861218 | 0.934016  |
| 29 | 6 | C | -7.520792  | 0.277761  | -0.176385 |
| 30 | 6 | C | -8.902275  | 0.365442  | -0.291422 |
| 31 | 6 | C | -9.742551  | -0.654639 | 0.197522  |
| 32 | 6 | C | -9.213465  | -1.777933 | 0.820370  |
| 33 | 1 | H | -9.345039  | 1.238765  | -0.761166 |
| 34 | 1 | H | -10.819111 | -0.558398 | 0.092947  |
| 35 | 1 | H | -9.857071  | -2.562376 | 1.208730  |
| 36 | 6 | C | -2.220559  | 1.975045  | -0.455109 |
| 37 | 6 | C | -1.474912  | 3.145382  | -0.515814 |
| 38 | 6 | C | -1.749431  | 4.231216  | 0.338707  |
| 39 | 6 | C | -2.774319  | 4.164288  | 1.274030  |
| 40 | 1 | H | -1.999165  | 1.157246  | -1.131278 |
| 41 | 1 | H | -0.659614  | 3.226540  | -1.228070 |
| 42 | 1 | H | -1.145250  | 5.130536  | 0.266399  |
| 43 | 1 | H | -2.989199  | 4.997599  | 1.937568  |
| 44 | 1 | H | -6.890860  | 1.087298  | -0.528870 |
| 45 | 6 | C | -1.020583  | -2.510173 | 0.176847  |
| 46 | 6 | C | 0.187198   | -1.588452 | -0.048499 |
| 47 | 6 | C | 1.516189   | -2.302162 | 0.237812  |
| 48 | 6 | C | 3.366264   | -0.780323 | 0.928102  |
| 49 | 6 | C | 4.432362   | 0.124833  | 0.218319  |
| 50 | 6 | C | 4.292753   | -0.337750 | -1.227415 |
| 51 | 6 | C | 3.223149   | -1.240460 | -1.327530 |
| 52 | 1 | H | -0.962547  | -3.394828 | -0.470315 |
| 53 | 1 | H | -1.051690  | -2.852737 | 1.214699  |
| 54 | 1 | H | 0.100253   | -0.716749 | 0.607845  |
| 55 | 1 | H | 0.184406   | -1.214615 | -1.078360 |
| 56 | 1 | H | 1.597042   | -3.229299 | -0.343745 |
| 57 | 1 | H | 1.589129   | -2.562109 | 1.297251  |
| 58 | 7 | N | 2.668694   | -1.465831 | -0.056731 |
| 59 | 8 | O | 3.142973   | -0.855091 | 2.120657  |
| 60 | 6 | C | 3.965675   | 1.561460  | 0.467910  |
| 61 | 6 | C | 3.963938   | 2.115277  | 1.728418  |
| 62 | 6 | C | 3.362222   | 2.546410  | -0.411353 |
| 63 | 6 | C | 3.048404   | 3.677572  | 0.400010  |
| 64 | 1 | H | 3.288931   | 3.974967  | 2.491331  |
| 65 | 6 | C | 5.829338   | -0.137108 | 0.751684  |
| 66 | 6 | C | 6.466180   | -1.424920 | 0.926758  |
| 67 | 6 | C | 6.773010   | 0.807322  | 1.073274  |
| 68 | 6 | C | 7.794574   | -1.177069 | 1.369422  |
| 69 | 6 | C | 5.059217   | -0.046216 | -2.343853 |
| 70 | 6 | C | 4.721394   | -0.623129 | -3.576785 |
| 71 | 6 | C | 3.633102   | -1.491727 | -3.670168 |
| 72 | 6 | C | 2.869733   | -1.820837 | -2.542556 |
| 73 | 1 | H | 2.039029   | -2.514398 | -2.620532 |
| 74 | 1 | H | 3.376357   | -1.932581 | -4.628953 |
| 75 | 1 | H | 5.309554   | -0.394792 | -4.459985 |
| 76 | 1 | H | 5.907751   | 0.626216  | -2.259819 |
| 77 | 7 | N | 3.431258   | 3.382010  | 1.690354  |
| 78 | 6 | C | 3.031221   | 2.617461  | -1.780892 |
| 79 | 6 | C | 2.455737   | 4.839599  | -0.103351 |
| 80 | 6 | C | 2.436279   | 3.767601  | -2.283725 |
| 81 | 6 | C | 2.152652   | 4.873506  | -1.457773 |
| 82 | 1 | H | 3.232086   | 1.785580  | -2.442755 |
| 83 | 1 | H | 2.185498   | 3.816034  | -3.339408 |
| 84 | 1 | H | 1.692211   | 5.759864  | -1.883915 |
| 85 | 1 | H | 2.237922   | 5.682889  | 0.546205  |
| 86 | 1 | H | 4.281276   | 1.669817  | 2.658647  |
| 87 | 7 | N | 7.952085   | 0.191458  | 1.442688  |
| 88 | 1 | H | 8.783318   | 0.668665  | 1.749385  |
| 89 | 1 | H | 6.691186   | 1.883102  | 1.066349  |
| 90 | 6 | C | 8.699569   | -2.205728 | 1.649309  |
| 91 | 6 | C | 6.055272   | -2.759247 | 0.756963  |
| 92 | 6 | C | 6.950402   | -3.784862 | 1.031471  |
| 93 | 6 | C | 8.259920   | -3.512037 | 1.474715  |

|      |               |               |           |                         |           |           |
|------|---------------|---------------|-----------|-------------------------|-----------|-----------|
|      | 94            | 1             | H         | 5.051782                | -2.989987 | 0.415160  |
|      | 95            | 1             | H         | 8.936752                | -4.335481 | 1.682353  |
|      | 96            | 1             | H         | 9.708986                | -1.991555 | 1.989248  |
|      | 97            | 1             | H         | 6.638019                | -4.816927 | 0.903024  |
| 10ab | Center number | Atomic number | Atom type | Coordinates (Angstroms) |           |           |
|      |               |               |           | X                       | Y         | Z         |
|      | 1             | 6             | C         | 3.274553                | -1.358898 | 0.670027  |
|      | 2             | 6             | C         | 4.670576                | -1.212513 | 0.611539  |
|      | 3             | 6             | C         | 5.475372                | -2.034581 | 1.386115  |
|      | 4             | 6             | C         | 4.881442                | -2.993574 | 2.219619  |
|      | 5             | 6             | C         | 3.493899                | -3.121482 | 2.270764  |
|      | 6             | 6             | C         | 2.666238                | -2.302221 | 1.492654  |
|      | 7             | 6             | C         | 3.592325                | 0.316809  | -0.876259 |
|      | 8             | 6             | C         | 5.018634                | -0.100303 | -0.380661 |
|      | 9             | 1             | H         | 6.554777                | -1.943673 | 1.347420  |
|      | 10            | 1             | H         | 5.507739                | -3.637691 | 2.828722  |
|      | 11            | 1             | H         | 3.042826                | -3.865571 | 2.920652  |
|      | 12            | 1             | H         | 1.587110                | -2.405974 | 1.534106  |
|      | 13            | 8             | O         | 3.327014                | 1.159256  | -1.715490 |
|      | 14            | 6             | C         | 5.818525                | -0.629898 | -1.562840 |
|      | 15            | 6             | C         | 5.330870                | -0.878241 | -2.823108 |
|      | 16            | 6             | C         | 7.208996                | -1.036137 | -1.576998 |
|      | 17            | 1             | H         | 4.350457                | -0.677731 | -3.227108 |
|      | 18            | 1             | H         | 6.213132                | -1.671865 | -4.584248 |
|      | 19            | 6             | C         | 5.667710                | 1.121241  | 0.252416  |
|      | 20            | 6             | C         | 6.461275                | 2.009539  | -0.431742 |
|      | 21            | 6             | C         | 5.488658                | 1.670317  | 1.581810  |
|      | 22            | 1             | H         | 6.807214                | 1.962299  | -1.452741 |
|      | 23            | 6             | C         | 6.225023                | 2.889391  | 1.624189  |
|      | 24            | 1             | H         | 7.397351                | 3.832564  | 0.120142  |
|      | 25            | 7             | N         | 2.658760                | -0.445628 | -0.200631 |
|      | 26            | 7             | N         | 6.801350                | 3.065573  | 0.383873  |
|      | 27            | 7             | N         | 6.318103                | -1.428864 | -3.613213 |
|      | 28            | 6             | C         | 7.482076                | -1.535322 | -2.881598 |
|      | 29            | 6             | C         | 8.260517                | -1.010339 | -0.640993 |
|      | 30            | 6             | C         | 9.512104                | -1.487248 | -1.009236 |
|      | 31            | 6             | C         | 9.750476                | -1.990326 | -2.303806 |
|      | 32            | 6             | C         | 8.740417                | -2.016629 | -3.257240 |
|      | 33            | 1             | H         | 10.324918               | -1.467140 | -0.289291 |
|      | 34            | 1             | H         | 10.739434               | -2.356676 | -2.562562 |
|      | 35            | 1             | H         | 8.921659                | -2.394645 | -4.259562 |
|      | 36            | 6             | C         | 4.791927                | 1.278020  | 2.741919  |
|      | 37            | 6             | C         | 4.849678                | 2.080215  | 3.874461  |
|      | 38            | 6             | C         | 5.591632                | 3.277732  | 3.889196  |
|      | 39            | 6             | C         | 6.289441                | 3.696859  | 2.763877  |
|      | 40            | 1             | H         | 4.220729                | 0.357257  | 2.758768  |
|      | 41            | 1             | H         | 4.313805                | 1.777408  | 4.769358  |
|      | 42            | 1             | H         | 5.618403                | 3.881507  | 4.791452  |
|      | 43            | 1             | H         | 6.861947                | 4.620298  | 2.766444  |
|      | 44            | 1             | H         | 8.101885                | -0.598451 | 0.349896  |
|      | 45            | 6             | C         | 1.225797                | -0.275090 | -0.391383 |
|      | 46            | 6             | C         | 0.588130                | 0.624485  | 0.680202  |
|      | 47            | 6             | C         | -1.764122               | -0.409618 | 0.750348  |
|      | 48            | 6             | C         | -3.909777               | -0.591692 | -0.502787 |
|      | 49            | 6             | C         | -5.384483               | -0.083372 | -0.343000 |
|      | 50            | 6             | C         | -5.341635               | 0.501019  | 1.064597  |
|      | 51            | 6             | C         | -4.028455               | 0.442228  | 1.555054  |
|      | 52            | 1             | H         | 0.762890                | -1.267314 | -0.415778 |
|      | 53            | 1             | H         | 1.098795                | 0.178596  | -1.378028 |
|      | 54            | 1             | H         | 1.101686                | 1.591272  | 0.652832  |
|      | 55            | 1             | H         | 0.776102                | 0.201108  | 1.675706  |
|      | 56            | 1             | H         | -1.568373               | -0.790681 | 1.761079  |
|      | 57            | 1             | H         | -1.526064               | -1.203642 | 0.038463  |
|      | 58            | 7             | N         | -3.192474               | -0.173822 | 0.608348  |
|      | 59            | 8             | O         | -3.445015               | -1.211345 | -1.440679 |
|      | 60            | 6             | C         | -5.580153               | 0.950980  | -1.452713 |
|      | 61            | 6             | C         | -5.626607               | 0.595633  | -2.781892 |
|      | 62            | 6             | C         | -5.620481               | 2.401523  | -1.416096 |
|      | 63            | 6             | C         | -5.717022               | 2.840387  | -2.770141 |
|      | 64            | 1             | H         | -5.755860               | 1.719015  | -4.576759 |
|      | 65            | 6             | C         | -6.377797               | -1.229428 | -0.431111 |

|      |               |               |           |                         |           |           |
|------|---------------|---------------|-----------|-------------------------|-----------|-----------|
|      | 66            | 6             | C         | -6.304609               | -2.501915 | 0.254899  |
|      | 67            | 6             | C         | -7.578347               | -1.219201 | -1.098193 |
|      | 68            | 6             | C         | -7.495203               | -3.213945 | -0.057945 |
|      | 69            | 6             | C         | -6.359929               | 0.985731  | 1.869176  |
|      | 70            | 6             | C         | -6.052570               | 1.456095  | 3.154049  |
|      | 71            | 6             | C         | -4.736862               | 1.420588  | 3.618392  |
|      | 72            | 6             | C         | -3.702416               | 0.904955  | 2.826920  |
|      | 73            | 1             | H         | -2.685719               | 0.863672  | 3.203161  |
|      | 74            | 1             | H         | -4.506825               | 1.787948  | 4.614185  |
|      | 75            | 1             | H         | -6.840925               | 1.846510  | 3.789823  |
|      | 76            | 1             | H         | -7.381744               | 1.002454  | 1.501944  |
|      | 77            | 7             | N         | -5.718994               | 1.718282  | -3.570802 |
|      | 78            | 6             | C         | -5.575929               | 3.392066  | -0.412550 |
|      | 79            | 6             | C         | -5.786725               | 4.188777  | -3.133708 |
|      | 80            | 6             | C         | -5.639333               | 4.732303  | -0.770431 |
|      | 81            | 6             | C         | -5.747201               | 5.132359  | -2.116649 |
|      | 82            | 1             | H         | -5.489600               | 3.119186  | 0.630866  |
|      | 83            | 1             | H         | -5.603071               | 5.490246  | 0.006637  |
|      | 84            | 1             | H         | -5.795372               | 6.189039  | -2.362131 |
|      | 85            | 1             | H         | -5.862675               | 4.484317  | -4.176539 |
|      | 86            | 1             | H         | -5.567642               | -0.389792 | -3.217591 |
|      | 87            | 7             | N         | -8.252332               | -2.403752 | -0.878324 |
|      | 88            | 1             | H         | -9.141707               | -2.647535 | -1.281239 |
|      | 89            | 1             | H         | -8.006972               | -0.447966 | -1.719076 |
|      | 90            | 6             | C         | -7.756687               | -4.497455 | 0.431721  |
|      | 91            | 6             | C         | -5.361548               | -3.115079 | 1.099389  |
|      | 92            | 6             | C         | -5.616917               | -4.388614 | 1.590588  |
|      | 93            | 6             | C         | -6.802136               | -5.075101 | 1.259437  |
|      | 94            | 1             | H         | -4.443893               | -2.602861 | 1.368354  |
|      | 95            | 1             | H         | -6.973065               | -6.070549 | 1.658322  |
|      | 96            | 1             | H         | -8.672794               | -5.022474 | 0.175901  |
|      | 97            | 1             | H         | -4.891634               | -4.866418 | 2.242444  |
|      | 98            | 6             | C         | -0.918739               | 0.845632  | 0.479643  |
|      | 99            | 1             | H         | -1.252765               | 1.650143  | 1.144410  |
|      | 100           | 1             | H         | -1.116681               | 1.188037  | -0.543355 |
| 10ac | Center number | Atomic number | Atom type | Coordinates (Angstroms) |           |           |
|      |               |               |           | X                       | Y         | Z         |
|      | 1             | 6             | C         | 4.077401                | -1.663192 | 1.511218  |
|      | 2             | 6             | C         | 5.109574                | -0.749155 | 1.241594  |
|      | 3             | 6             | C         | 5.837401                | -0.212495 | 2.293146  |
|      | 4             | 6             | C         | 5.527983                | -0.588808 | 3.608332  |
|      | 5             | 6             | C         | 4.499400                | -1.496109 | 3.859035  |
|      | 6             | 6             | C         | 3.756035                | -2.049890 | 2.809040  |
|      | 7             | 6             | C         | 4.113675                | -1.529597 | -0.786553 |
|      | 8             | 6             | C         | 5.219892                | -0.547135 | -0.271490 |
|      | 9             | 1             | H         | 6.644007                | 0.486577  | 2.104761  |
|      | 10            | 1             | H         | 6.093906                | -0.169533 | 4.434218  |
|      | 11            | 1             | H         | 4.266951                | -1.781497 | 4.880810  |
|      | 12            | 1             | H         | 2.958232                | -2.757410 | 3.007997  |
|      | 13            | 8             | O         | 3.838851                | -1.775270 | -1.947803 |
|      | 14            | 6             | C         | 6.573427                | -0.995274 | -0.804125 |
|      | 15            | 6             | C         | 6.831390                | -2.165539 | -1.476178 |
|      | 16            | 6             | C         | 7.848096                | -0.323728 | -0.652129 |
|      | 17            | 1             | H         | 6.141910                | -2.922795 | -1.816275 |
|      | 18            | 1             | H         | 8.613284                | -3.029478 | -2.243292 |
|      | 19            | 6             | C         | 4.849578                | 0.851251  | -0.743343 |
|      | 20            | 6             | C         | 5.294869                | 1.409097  | -1.917063 |
|      | 21            | 6             | C         | 3.887482                | 1.781091  | -0.185931 |
|      | 22            | 1             | H         | 6.004657                | 1.015730  | -2.628238 |
|      | 23            | 6             | C         | 3.821752                | 2.888080  | -1.080534 |
|      | 24            | 1             | H         | 4.867374                | 3.241054  | -2.899395 |
|      | 25            | 7             | N         | 3.484970                | -2.088429 | 0.310883  |
|      | 26            | 7             | N         | 4.689111                | 2.628641  | -2.120788 |
|      | 27            | 7             | N         | 8.181705                | -2.276162 | -1.734130 |
|      | 28            | 6             | C         | 8.832388                | -1.162411 | -1.246626 |
|      | 29            | 6             | C         | 8.264186                | 0.904318  | -0.103113 |
|      | 30            | 6             | C         | 9.610200                | 1.245494  | -0.139430 |
|      | 31            | 6             | C         | 10.565806               | 0.388544  | -0.721083 |
|      | 32            | 6             | C         | 10.188778               | -0.823470 | -1.285680 |
|      | 33            | 1             | H         | 9.933140                | 2.192789  | 0.282127  |
|      | 34            | 1             | H         | 11.611132               | 0.682303  | -0.734537 |

|      |     |   |           |                         |           |           |
|------|-----|---|-----------|-------------------------|-----------|-----------|
|      | 35  | 1 | H         | 10.920336               | -1.483191 | -1.743912 |
|      | 36  | 6 | C         | 3.070666                | 1.809449  | 0.962444  |
|      | 37  | 6 | C         | 2.240014                | 2.901716  | 1.180152  |
|      | 38  | 6 | C         | 2.199877                | 3.984476  | 0.279936  |
|      | 39  | 6 | C         | 2.992192                | 3.991874  | -0.860754 |
|      | 40  | 1 | H         | 3.093064                | 0.995222  | 1.677285  |
|      | 41  | 1 | H         | 1.609858                | 2.924058  | 2.064331  |
|      | 42  | 1 | H         | 1.539901                | 4.823305  | 0.479380  |
|      | 43  | 1 | H         | 2.965320                | 4.822400  | -1.560736 |
|      | 44  | 1 | H         | 7.537431                | 1.588992  | 0.320843  |
|      | 45  | 6 | C         | 2.384113                | -3.034644 | 0.190870  |
|      | 46  | 6 | C         | 1.005983                | -2.439633 | 0.524803  |
|      | 47  | 6 | C         | -1.978581               | -1.624659 | -0.294596 |
|      | 48  | 6 | C         | -4.119114               | -0.550498 | -0.993606 |
|      | 49  | 6 | C         | -5.348173               | 0.131205  | -0.296359 |
|      | 50  | 6 | C         | -5.067723               | -0.189552 | 1.167263  |
|      | 51  | 6 | C         | -3.820866               | -0.824514 | 1.274450  |
|      | 52  | 1 | H         | 2.593464                | -3.892494 | 0.841080  |
|      | 53  | 1 | H         | 2.403337                | -3.383504 | -0.845209 |
|      | 54  | 1 | H         | 0.287152                | -3.268449 | 0.492719  |
|      | 55  | 1 | H         | 1.006605                | -2.070840 | 1.559071  |
|      | 56  | 1 | H         | -1.891620               | -2.530338 | 0.316806  |
|      | 57  | 1 | H         | -2.024921               | -1.930264 | -1.343511 |
|      | 58  | 7 | N         | -3.260855               | -0.998729 | -0.001437 |
|      | 59  | 8 | O         | -3.917915               | -0.648144 | -2.189375 |
|      | 60  | 6 | C         | -5.247149               | 1.615828  | -0.655732 |
|      | 61  | 6 | C         | -5.380375               | 2.055952  | -1.953391 |
|      | 62  | 6 | C         | -4.922609               | 2.785216  | 0.140702  |
|      | 63  | 6 | C         | -4.902450               | 3.895283  | -0.755892 |
|      | 64  | 1 | H         | -5.211398               | 3.966680  | -2.858737 |
|      | 65  | 6 | C         | -6.657209               | -0.488507 | -0.754720 |
|      | 66  | 6 | C         | -6.980621               | -1.898109 | -0.813647 |
|      | 67  | 6 | C         | -7.800392               | 0.184792  | -1.108798 |
|      | 68  | 6 | C         | -8.338488               | -1.998292 | -1.224093 |
|      | 69  | 6 | C         | -5.852007               | -0.010460 | 2.295240  |
|      | 70  | 6 | C         | -5.362346               | -0.422142 | 3.543338  |
|      | 71  | 6 | C         | -4.104887               | -1.019751 | 3.640951  |
|      | 72  | 6 | C         | -3.315884               | -1.237952 | 2.504407  |
|      | 73  | 1 | H         | -2.347925               | -1.720722 | 2.586150  |
|      | 74  | 1 | H         | -3.731678               | -1.333797 | 4.611394  |
|      | 75  | 1 | H         | -5.964652               | -0.278123 | 4.434796  |
|      | 76  | 1 | H         | -6.832765               | 0.447655  | 2.208091  |
|      | 77  | 7 | N         | -5.186463               | 3.415866  | -2.016567 |
|      | 78  | 6 | C         | -4.632698               | 3.041073  | 1.497442  |
|      | 79  | 6 | C         | -4.629814               | 5.204245  | -0.346873 |
|      | 80  | 6 | C         | -4.356919               | 4.339212  | 1.906392  |
|      | 81  | 6 | C         | -4.357389               | 5.415253  | 0.997617  |
|      | 82  | 1 | H         | -4.617503               | 2.236720  | 2.220742  |
|      | 83  | 1 | H         | -4.133156               | 4.528492  | 2.952267  |
|      | 84  | 1 | H         | -4.138343               | 6.418614  | 1.350536  |
|      | 85  | 1 | H         | -4.626741               | 6.024138  | -1.059964 |
|      | 86  | 1 | H         | -5.569719               | 1.475234  | -2.842960 |
|      | 87  | 7 | N         | -8.811147               | -0.712967 | -1.389463 |
|      | 88  | 1 | H         | -9.736346               | -0.465496 | -1.698402 |
|      | 89  | 1 | H         | -7.970459               | 1.247636  | -1.182458 |
|      | 90  | 6 | C         | -8.984766               | -3.226299 | -1.396720 |
|      | 91  | 6 | C         | -6.267859               | -3.084710 | -0.564441 |
|      | 92  | 6 | C         | -6.905136               | -4.307127 | -0.732415 |
|      | 93  | 6 | C         | -8.250346               | -4.378677 | -1.145823 |
|      | 94  | 1 | H         | -5.232130               | -3.050770 | -0.243474 |
|      | 95  | 1 | H         | -8.721126               | -5.349457 | -1.269435 |
|      | 96  | 1 | H         | -10.022628              | -3.277382 | -1.713955 |
|      | 97  | 1 | H         | -6.358982               | -5.226271 | -0.542191 |
|      | 98  | 6 | C         | 0.572588                | -1.309776 | -0.420562 |
|      | 99  | 1 | H         | -0.786216               | -0.681298 | -0.073520 |
|      | 100 | 1 | H         | 1.328669                | -0.517700 | -0.398447 |
|      | 101 | 1 | H         | 0.555261                | -1.683299 | -1.453036 |
|      | 102 | 1 | H         | -0.778909               | -0.332369 | 0.967179  |
|      | 103 | 1 | H         | -0.941089               | 0.207090  | -0.695396 |
| 10ad |     |   | Atom type | Coordinates (Angstroms) |           |           |

| Center<br>number | Atomic<br>number |   | X            | Y            | Z            |
|------------------|------------------|---|--------------|--------------|--------------|
| 1                | 6                | C | 0.000001421  | 0.000014646  | 0.000011074  |
| 2                | 6                | C | -0.000005819 | -0.000003728 | -0.000003728 |
| 3                | 6                | C | 0.000001051  | 0.000002341  | -0.000003366 |
| 4                | 6                | C | -0.000001418 | 0.000005315  | 0.000000864  |
| 5                | 6                | C | 0.000004403  | 0.000003253  | 0.000004516  |
| 6                | 6                | C | -0.000003968 | -0.000005393 | -0.000006265 |
| 7                | 6                | C | -0.000005876 | -0.000006741 | -0.000009344 |
| 8                | 6                | C | 0.000012337  | 0.000023986  | -0.000009763 |
| 9                | 1                | H | 0.000000853  | -0.000002666 | 0.000001183  |
| 10               | 1                | H | -0.000001036 | -0.000002383 | -0.000000008 |
| 11               | 1                | H | 0.000000261  | -0.000000464 | 0.000000139  |
| 12               | 1                | H | 0.000000639  | -0.000000341 | 0.000000303  |
| 13               | 8                | O | 0.000004085  | 0.000004828  | 0.000006546  |
| 14               | 6                | C | -0.000000944 | -0.000013693 | 0.000018815  |
| 15               | 6                | C | 0.000002331  | 0.000001791  | -0.000004861 |
| 16               | 6                | C | -0.000010263 | 0.000000092  | -0.000005646 |
| 17               | 1                | H | -0.000001821 | -0.000001435 | -0.000002707 |
| 18               | 1                | H | -0.000000723 | 0.000003599  | 0.000003719  |
| 19               | 6                | C | -0.000011201 | -0.000001712 | -0.000015361 |
| 20               | 6                | C | 0.000003014  | 0.000000539  | 0.000012814  |
| 21               | 6                | C | 0.000007652  | 0.000000476  | 0.000006380  |
| 22               | 1                | H | 0.000000695  | -0.000001015 | 0.000000456  |
| 23               | 6                | C | -0.000005294 | 0.000002363  | -0.000002545 |
| 24               | 1                | H | -0.000002128 | 0.000001677  | -0.000006128 |
| 25               | 7                | N | -0.000000941 | -0.000015074 | 0.000001031  |
| 26               | 7                | N | -0.000001823 | -0.000003516 | 0.000002395  |
| 27               | 7                | N | -0.000001184 | -0.000000838 | -0.000002194 |
| 28               | 6                | C | 0.000005945  | -0.000000903 | 0.000001764  |
| 29               | 6                | C | 0.000004686  | -0.000001915 | -0.000006157 |
| 30               | 6                | C | 0.000002593  | 0.000005940  | 0.000001881  |
| 31               | 6                | C | -0.000001433 | -0.000000564 | 0.000006588  |
| 32               | 6                | C | -0.000002158 | 0.000000497  | -0.000004588 |
| 33               | 1                | H | -0.000000503 | -0.000000457 | 0.000000072  |
| 34               | 1                | H | -0.000000047 | -0.000001572 | -0.000001196 |
| 35               | 1                | H | -0.000000842 | 0.000001422  | -0.000000855 |
| 36               | 6                | C | 0.000004706  | -0.000000503 | -0.000003523 |
| 37               | 6                | C | -0.000002683 | -0.000011565 | -0.000003768 |
| 38               | 6                | C | -0.000010166 | 0.000007369  | 0.000006592  |
| 39               | 6                | C | 0.000012625  | 0.000001167  | 0.000005072  |
| 40               | 1                | H | -0.000000786 | -0.000000690 | 0.000001043  |
| 41               | 1                | H | 0.000000492  | 0.000003044  | 0.000002081  |
| 42               | 1                | H | -0.000000129 | 0.000000846  | -0.000003023 |
| 43               | 1                | H | 0.000000023  | 0.000000002  | -0.000002437 |
| 44               | 1                | H | -0.000000639 | 0.000000728  | 0.000001907  |
| 45               | 6                | C | 0.000017986  | 0.000014953  | 0.000000427  |
| 46               | 6                | C | -0.000013184 | -0.000017208 | -0.000008583 |
| 47               | 6                | C | 0.000006211  | -0.000001039 | -0.000001807 |
| 48               | 6                | C | 0.000002973  | -0.000005759 | 0.000004789  |
| 49               | 6                | C | -0.000010376 | -0.000004824 | 0.000010470  |
| 50               | 6                | C | 0.000000075  | 0.000005301  | 0.000009101  |
| 51               | 6                | C | 0.000009230  | 0.000003778  | -0.000004990 |
| 52               | 1                | H | -0.000004391 | -0.000002808 | -0.000002035 |
| 53               | 1                | H | -0.000001937 | 0.000000080  | 0.000002068  |
| 54               | 1                | H | 0.000006116  | 0.000003600  | 0.000004015  |
| 55               | 1                | H | -0.000003020 | 0.000004147  | 0.000007210  |
| 56               | 1                | H | 0.000003996  | -0.000000484 | -0.000006842 |
| 57               | 1                | H | 0.000003205  | 0.000011671  | -0.000002453 |
| 58               | 7                | N | -0.000015047 | -0.000015345 | 0.000007802  |
| 59               | 8                | O | 0.000004908  | -0.000000675 | -0.000002979 |
| 60               | 6                | C | -0.000011989 | 0.000003716  | -0.000028309 |
| 61               | 6                | C | 0.000011753  | -0.000000529 | 0.000004767  |
| 62               | 6                | C | -0.000004537 | -0.000006313 | 0.000009552  |
| 63               | 6                | C | 0.000008258  | 0.000003028  | -0.000001048 |
| 64               | 1                | H | -0.000004409 | -0.000002484 | 0.000001736  |
| 65               | 6                | C | 0.000001167  | 0.000008044  | -0.000002253 |
| 66               | 6                | C | 0.000007594  | -0.000003485 | -0.000000394 |
| 67               | 6                | C | 0.000010959  | -0.000000083 | 0.000002518  |
| 68               | 6                | C | -0.000001399 | 0.000005195  | 0.000004130  |
| 69               | 6                | C | -0.000010117 | 0.000009114  | -0.000003070 |

|  |     |   |   |               |              |              |
|--|-----|---|---|---------------|--------------|--------------|
|  | 70  | 6 | C | 0.000004760   | -0.000003459 | 0.000001748  |
|  | 71  | 6 | C | 0.000005812   | -0.000008899 | 0.000003913  |
|  | 72  | 6 | C | -0.000007542  | 0.000000595  | -0.000008915 |
|  | 73  | 1 | H | 0.000000444   | 0.000003797  | 0.000001558  |
|  | 74  | 1 | H | -0.000002252  | 0.000003153  | -0.000000292 |
|  | 75  | 1 | H | -0.000000625  | 0.000001182  | 0.000000539  |
|  | 76  | 1 | H | -0.000000175  | -0.000000722 | -0.000000485 |
|  | 77  | 7 | N | -0.000000048  | 0.000005450  | 0.000000496  |
|  | 78  | 6 | C | 0.000004996   | -0.000004226 | 0.000002539  |
|  | 79  | 6 | C | -0.000000688  | 0.000003388  | -0.000004073 |
|  | 80  | 6 | C | -0.000002006  | -0.000002759 | -0.000003791 |
|  | 81  | 6 | C | 0.000001869   | 0.000004049  | 0.0000008203 |
|  | 82  | 1 | H | 0.000000774   | -0.000004616 | -0.000000956 |
|  | 83  | 1 | H | 0.000002261   | -0.000002005 | -0.000000875 |
|  | 84  | 1 | H | -0.000000598  | -0.000000525 | -0.000000119 |
|  | 85  | 1 | H | 0.000001238   | -0.000000019 | -0.000000235 |
|  | 86  | 1 | H | -0.0000004196 | -0.000002529 | 0.000001059  |
|  | 87  | 7 | N | -0.000007043  | 0.000000854  | -0.000008696 |
|  | 88  | 1 | H | 0.000001291   | -0.000001202 | 0.000002764  |
|  | 89  | 1 | H | 0.000000149   | -0.000002162 | 0.000000691  |
|  | 90  | 6 | C | 0.000001477   | -0.000006335 | 0.000000214  |
|  | 91  | 6 | C | -0.000003575  | -0.000005558 | 0.000001490  |
|  | 92  | 6 | C | -0.000006071  | -0.000000524 | 0.000001125  |
|  | 93  | 6 | C | 0.000003698   | 0.000004854  | -0.000001292 |
|  | 94  | 1 | H | 0.000002980   | 0.000001080  | -0.000001621 |
|  | 95  | 1 | H | 0.000000494   | 0.000000087  | -0.000000270 |
|  | 96  | 1 | H | 0.000000076   | -0.000001364 | -0.000000216 |
|  | 97  | 1 | H | 0.000000754   | 0.000000063  | 0.000000285  |
|  | 98  | 6 | C | -0.000006934  | 0.000003831  | -0.000005642 |
|  | 99  | 6 | C | -0.000002148  | 0.000004014  | 0.000004226  |
|  | 100 | 1 | H | 0.000001088   | -0.000003452 | 0.000002628  |
|  | 101 | 1 | H | -0.000000723  | -0.000002173 | -0.000001383 |
|  | 102 | 1 | H | -0.000000822  | -0.000004439 | -0.000003999 |
|  | 103 | 1 | H | 0.000000898   | 0.000001751  | 0.000001092  |
|  | 104 | 6 | C | 0.000000206   | 0.000005935  | 0.000004694  |
|  | 105 | 1 | H | -0.000000281  | -0.000000703 | -0.000001645 |
|  | 106 | 1 | H | 0.000000451   | -0.000002065 | 0.000001650  |

**Table S11** Z matrix of the optimized structures obtained at B3LYP 631-G (d,p) level of theory

| 7aa                   | 7ab                   | 7ac                   | 7ad                   | 7ae                   |
|-----------------------|-----------------------|-----------------------|-----------------------|-----------------------|
| 1 2 2.0 6 1.0 26 1.0  | 1 2 2.0 6 1.0 25 1.0  | 1 2 2.0 6 1.0 25 1.0  | 1 2 2.0 6 1.0 25 1.0  | 1 2 2.0 6 1.0 25 1.0  |
| 2 3 1.0 8 1.0         | 2 3 1.0 8 1.0         | 2 3 1.0 8 1.0         | 2 3 1.0 8 1.0         | 2 3 1.0 8 1.0         |
| 3 4 2.0 9 1.0         | 3 4 2.0 9 1.0         | 3 4 2.0 9 1.0         | 3 4 2.0 9 1.0         | 3 4 2.0 9 1.0         |
| 4 5 1.0 10 1.0        | 4 5 1.0 45 1.0        | 4 5 1.0 45 1.0        | 4 5 1.0 45 1.0        | 4 5 1.0 45 1.0        |
| 5 6 2.0 11 1.0        | 5 6 2.0 10 1.0        | 5 6 2.0 10 1.0        | 5 6 2.0 10 1.0        | 5 6 2.0 10 1.0        |
| 6 12 1.0              | 6 11 1.0              | 6 11 1.0              | 6 11 1.0              | 6 11 1.0              |
| 7 8 1.0 14 2.0 26 1.0 | 7 8 1.0 13 2.0 25 1.0 | 7 8 1.0 13 2.0 25 1.0 | 7 8 1.0 13 2.0 25 1.0 | 7 8 1.0 13 2.0 25 1.0 |
| 8 15 1.0 20 1.0       | 8 14 1.0 19 1.0       | 8 14 1.0 19 1.0       | 8 14 1.0 19 1.0       | 8 14 1.0 19 1.0       |
| 9                     | 9                     | 9                     | 9                     | 9                     |
| 10                    | 10                    | 10                    | 10                    | 10                    |
| 11                    | 11                    | 11                    | 11                    | 11                    |
| 12                    | 12 25 1.0             | 12 25 1.0             | 12 25 1.0             | 12 25 1.0             |
| 13 26 1.0             | 13                    | 13                    | 13                    | 13                    |
| 14                    | 14 15 2.0 16 1.0      | 14 15 2.0 16 1.0      | 14 15 2.0 16 1.0      | 14 15 2.0 16 1.0      |
| 15 16 2.0 17 1.0      | 15 17 1.0 27 1.0      | 15 17 1.0 27 1.0      | 15 17 1.0 27 1.0      | 15 17 1.0 27 1.0      |
| 16 18 1.0 28 1.0      | 16 28 2.0 29 1.0      | 16 28 2.0 29 1.0      | 16 28 2.0 29 1.0      | 16 28 2.0 29 1.0      |
| 17 29 2.0 30 1.0      | 17                    | 17                    | 17                    | 17                    |
| 18                    | 18 27 1.0             | 18 27 1.0             | 18 27 1.0             | 18 27 1.0             |
| 19 28 1.0             | 19 20 2.0 21 1.0      | 19 20 2.0 21 1.0      | 19 20 2.0 21 1.0      | 19 20 2.0 21 1.0      |
| 20 21 2.0 22 1.0      | 20 22 1.0 26 1.0      | 20 22 1.0 26 1.0      | 20 22 1.0 26 1.0      | 20 22 1.0 26 1.0      |
| 21 23 1.0 27 1.0      | 21 23 2.0 36 1.0      | 21 23 2.0 36 1.0      | 21 23 2.0 36 1.0      | 21 23 2.0 36 1.0      |
| 22 24 2.0 37 1.0      | 22                    | 22                    | 22                    | 22                    |
| 23                    | 23 26 1.0 39 1.0      | 23 26 1.0 39 1.0      | 23 26 1.0 39 1.0      | 23 26 1.0 39 1.0      |
| 24 27 1.0 40 1.0      | 24 26 1.0             | 24 26 1.0             | 24 26 1.0             | 24 26 1.0             |
| 25 27 1.0             | 25                    | 25                    | 25                    | 25                    |
| 26                    | 26                    | 26                    | 26                    | 26                    |
| 27                    | 27 28 1.0             | 27 28 1.0             | 27 28 1.0             | 27 28 1.0             |
| 28 29 1.0             | 28 32 1.0             | 28 32 1.0             | 28 32 1.0             | 28 32 1.0             |
| 29 33 1.0             | 29 30 2.0 44 1.0      | 29 30 2.0 44 1.0      | 29 30 2.0 44 1.0      | 29 30 2.0 44 1.0      |
| 30 31 2.0 45 1.0      | 30 31 1.0 33 1.0      | 30 31 1.0 33 1.0      | 30 31 1.0 33 1.0      | 30 31 1.0 33 1.0      |
| 31 32 1.0 34 1.0      | 31 32 2.0 34 1.0      | 31 32 2.0 34 1.0      | 31 32 2.0 34 1.0      | 31 32 2.0 34 1.0      |
| 32 33 2.0 35 1.0      | 32 35 1.0             | 32 35 1.0             | 32 35 1.0             | 32 35 1.0             |
| 33 36 1.0             | 33                    | 33                    | 33                    | 33                    |
| 34                    | 34                    | 34                    | 34                    | 34                    |
| 35                    | 35                    | 35                    | 35                    | 35                    |
| 36                    | 36 37 2.0 40 1.0      | 36 37 2.0 40 1.0      | 36 37 2.0 40 1.0      | 36 37 2.0 40 1.0      |
| 37 38 2.0 41 1.0      | 37 38 1.0 41 1.0      | 37 38 1.0 41 1.0      | 37 38 1.0 41 1.0      | 37 38 1.0 41 1.0      |
| 38 39 1.0 42 1.0      | 38 39 2.0 42 1.0      | 38 39 2.0 42 1.0      | 38 39 2.0 42 1.0      | 38 39 2.0 42 1.0      |
| 39 40 2.0 43 1.0      | 39 43 1.0             | 39 43 1.0             | 39 43 1.0             | 39 43 1.0             |
| 40 44 1.0             | 40                    | 40                    | 40                    | 40                    |
| 41                    | 41                    | 41                    | 41                    | 41                    |
| 42                    | 42                    | 42                    | 42                    | 42                    |
| 43                    | 43                    | 43                    | 43                    | 43                    |
| 44                    | 44                    | 44                    | 44                    | 44                    |
| 45                    | 45                    | 45                    | 45                    | 45 46 1.5 47 1.5      |
|                       |                       |                       |                       | 46                    |
|                       |                       |                       |                       | 47                    |
| 7af                   | 7ag                   | 7ah                   | 7ba                   | 7ca                   |
| 1 2 2.0 6 1.0 25 1.0  | 1 2 2.0 6 1.0 25 1.0  | 1 2 2.0 6 1.0 25 1.0  | 1 2 2.0 6 1.0 26 1.0  | 1 2 2.0 6 1.0 26 1.0  |
| 2 3 1.0 8 1.0         | 2 3 1.0 8 1.0         | 2 3 1.0 8 1.0         | 2 3 1.0 8 1.0         | 2 3 1.0 8 1.0         |
| 3 4 2.0 9 1.0         | 3 4 2.0 9 1.0         | 3 4 2.0 9 1.0         | 3 4 2.0 9 1.0         | 3 4 2.0 9 1.0         |
| 4 5 1.0 45 1.0        | 4 5 1.0 45 1.0        | 4 5 1.0 10 1.0        | 4 5 1.0 10 1.0        | 4 5 1.0 10 1.0        |
| 5 6 2.0 10 1.0        | 5 6 2.0 10 1.0        | 5 6 2.0 11 1.0        | 5 6 2.0 11 1.0        | 5 6 2.0 11 1.0        |
| 6 11 1.0              | 6 11 1.0              | 6 45 1.0              | 6 12 1.0              | 6 12 1.0              |
| 7 8 1.0 13 2.0 25 1.0 | 7 8 1.0 13 2.0 25 1.0 | 7 8 1.0 13 2.0 25 1.0 | 7 8 1.0 14 2.0 26 1.0 | 7 8 1.0 14 2.0 26 1.0 |
| 8 14 1.0 19 1.0       | 8 14 1.0 19 1.0       | 8 14 1.0 19 1.0       | 8 15 1.0 20 1.0       | 8 15 1.0 20 1.0       |
| 9                     | 9                     | 9                     | 9                     | 9                     |
| 10                    | 10                    | 10                    | 10                    | 10                    |
| 11                    | 11                    | 11                    | 11                    | 11                    |
| 12 25 1.0             | 12 25 1.0             | 12 25 1.0             | 12                    | 12                    |
| 13                    | 13                    | 13                    | 13 26 1.0             | 13 26 1.0             |
| 14 15 2.0 16 1.0      | 14 15 2.0 16 1.0      | 14 15 2.0 16 1.0      | 14                    | 14                    |
| 15 17 1.0 27 1.0      | 15 17 1.0 27 1.0      | 15 17 1.0 27 1.0      | 15 16 2.0 17 1.0      | 15 16 2.0 17 1.0      |
| 16 28 2.0 29 1.0      | 16 28 2.0 29 1.0      | 16 28 2.0 29 1.0      | 16 18 1.0 28 1.0      | 16 18 1.0 28 1.0      |
| 17                    | 17                    | 17                    | 17 29 2.0 30 1.0      | 17 29 2.0 30 1.0      |
| 18 27 1.0             | 18 27 1.0             | 18 27 1.0             | 18                    | 18                    |
| 19 20 2.0 21 1.0      | 19 20 2.0 21 1.0      | 19 20 2.0 21 1.0      | 19 28 1.0             | 19 28 1.0             |
| 20 22 1.0 26 1.0      | 20 22 1.0 26 1.0      | 20 22 1.0 26 1.0      | 20 21 2.0 22 1.0      | 20 21 2.0 22 1.0      |
| 21 23 2.0 36 1.0      | 21 23 2.0 36 1.0      | 21 23 2.0 36 1.0 22   | 21 23 1.0 27 1.0      | 21 23 1.0 27 1.0      |
| 22                    | 22                    | 23 26 1.0 39 1.0      | 22 24 2.0 36 1.0      | 22 24 2.0 36 1.0      |
| 23 26 1.0 39 1.0      | 23 26 1.0 39 1.0      | 24 26 1.0             | 23                    | 23                    |
| 24 26 1.0             | 24 26 1.0             | 25                    | 24 27 1.0 39 1.0      | 24 27 1.0 39 1.0      |

|                                                                                                                                                                                                                                                                                                                                                                                                                                                                                                                                                                                                                                                                  |                                                                                                                                                                                                                                                                                                                                                                                                                                                                                                                                                                                                                        |                                                                                                                                                                                                                                                                                                                                                                                                                                                                                                                                                                                                                        |                                                                                                                                                                                                                                                                                                                                                                                                                                                                                                                                                                                                                        |                                                                                                                                                                                                                                                                                                                                                                                                                                                                                                                                                                                                                                                                  |
|------------------------------------------------------------------------------------------------------------------------------------------------------------------------------------------------------------------------------------------------------------------------------------------------------------------------------------------------------------------------------------------------------------------------------------------------------------------------------------------------------------------------------------------------------------------------------------------------------------------------------------------------------------------|------------------------------------------------------------------------------------------------------------------------------------------------------------------------------------------------------------------------------------------------------------------------------------------------------------------------------------------------------------------------------------------------------------------------------------------------------------------------------------------------------------------------------------------------------------------------------------------------------------------------|------------------------------------------------------------------------------------------------------------------------------------------------------------------------------------------------------------------------------------------------------------------------------------------------------------------------------------------------------------------------------------------------------------------------------------------------------------------------------------------------------------------------------------------------------------------------------------------------------------------------|------------------------------------------------------------------------------------------------------------------------------------------------------------------------------------------------------------------------------------------------------------------------------------------------------------------------------------------------------------------------------------------------------------------------------------------------------------------------------------------------------------------------------------------------------------------------------------------------------------------------|------------------------------------------------------------------------------------------------------------------------------------------------------------------------------------------------------------------------------------------------------------------------------------------------------------------------------------------------------------------------------------------------------------------------------------------------------------------------------------------------------------------------------------------------------------------------------------------------------------------------------------------------------------------|
| 25<br>26<br>27 28 1.0<br>28 32 1.0<br>29 30 2.0 44 1.0<br>30 31 1.0 33 1.0<br>31 32 2.0 34 1.0<br>32 35 1.0<br>33<br>34<br>35<br>36 37 2.0 40 1.0<br>37 38 1.0 41 1.0<br>38 39 2.0 42 1.0<br>39 43 1.0<br>40<br>41<br>42<br>43<br>44<br>45 46 1.0 47 1.0 48 1.0<br>46<br>47<br>48                                                                                                                                                                                                                                                                                                                                                                                | 25<br>26<br>27 28 1.0<br>28 32 1.0<br>29 30 2.0 44 1.0<br>30 31 1.0 33 1.0<br>31 32 2.0 34 1.0<br>32 35 1.0<br>33<br>34<br>35<br>36 37 2.0 40 1.0<br>37 38 1.0 41 1.0<br>38 39 2.0 42 1.0<br>39 43 1.0<br>40<br>41<br>42<br>43<br>44<br>45 46 1.0<br>46 47 1.0 48 1.0 49 1.0<br>47<br>48<br>49                                                                                                                                                                                                                                                                                                                         | 26<br>27 28 1.0<br>28 32 1.0<br>29 30 2.0 44 1.0<br>30 31 1.0 33 1.0<br>31 32 2.0 34 1.0<br>32 35 1.0<br>33<br>34<br>35<br>36 37 2.0 40 1.0<br>37 38 1.0 41 1.0<br>38 39 2.0 42 1.0<br>39 43 1.0<br>40<br>41<br>42<br>43<br>44<br>45                                                                                                                                                                                                                                                                                                                                                                                   | 25 27 1.0<br>26<br>27<br>28 29 1.0<br>29 33 1.0<br>30 31 2.0 43 1.0<br>31 32 1.0 44 1.0<br>32 33 2.0 34 1.0<br>33 35 1.0<br>34<br>35<br>36 37 2.0 40 1.0<br>37 38 1.0 45 1.0<br>38 39 2.0 41 1.0<br>39 42 1.0<br>40<br>41<br>42<br>43<br>44 46 3.0<br>45 47 3.0<br>46<br>47                                                                                                                                                                                                                                                                                                                                            | 25 27 1.0<br>26<br>27<br>28 29 1.0<br>29 33 1.0<br>30 31 2.0 43 1.0<br>31 32 1.0 45 1.0<br>32 33 2.0 34 1.0<br>33 35 1.0<br>34<br>35<br>36 37 2.0 40 1.0<br>37 38 1.0 44 1.0<br>38 39 2.0 41 1.0<br>39 42 1.0<br>40<br>41<br>42<br>43<br>44 47 1.0<br>45 46 1.0<br>46 48 1.0 49 1.0 50 1.0<br>47 51 1.0 52 1.0 53 1.0<br>48<br>49<br>50<br>51<br>52<br>53                                                                                                                                                                                                                                                                                                        |
| <b>7da</b>                                                                                                                                                                                                                                                                                                                                                                                                                                                                                                                                                                                                                                                       | <b>7ea</b>                                                                                                                                                                                                                                                                                                                                                                                                                                                                                                                                                                                                             | <b>7ec</b>                                                                                                                                                                                                                                                                                                                                                                                                                                                                                                                                                                                                             | <b>7ed</b>                                                                                                                                                                                                                                                                                                                                                                                                                                                                                                                                                                                                             | <b>7fa</b>                                                                                                                                                                                                                                                                                                                                                                                                                                                                                                                                                                                                                                                       |
| 1 2 2.0 6 1.0 24 1.0<br>2 3 1.0 8 1.0<br>3 4 2.0 9 1.0<br>4 5 1.0 10 1.0<br>5 6 2.0 11 1.0<br>6 12 1.0<br>7 8 1.0 14 2.0 24 1.0<br>8 15 1.0 19 1.0<br>9<br>10<br>11<br>12<br>13 24 1.0<br>14<br>15 16 2.0 17 1.0<br>16 26 1.0 45 1.0<br>17 27 2.0 28 1.0<br>18 26 1.0<br>19 20 2.0 21 1.0<br>20 25 1.0 44 1.0<br>21 22 2.0 35 1.0<br>22 25 1.0 38 1.0<br>23 25 1.0<br>24<br>25<br>26 27 1.0<br>27 31 1.0<br>28 29 2.0 43 1.0<br>29 30 1.0 32 1.0<br>30 31 2.0 33 1.0<br>31 34 1.0<br>32<br>33<br>34<br>35 36 2.0 39 1.0<br>36 37 1.0 40 1.0<br>37 38 2.0 41 1.0<br>38 42 1.0<br>39<br>40<br>41<br>42<br>43<br>44 46 1.0 47 1.0 48 1.0<br>45 49 1.0 50 1.0 51 1.0 | 1 2 2.0 6 1.0 26 1.0<br>2 3 1.0 8 1.0<br>3 4 2.0 9 1.0<br>4 5 1.0 10 1.0<br>5 6 2.0 11 1.0<br>6 12 1.0<br>7 8 1.0 14 2.0 26 1.0<br>8 15 1.0 20 1.0<br>9<br>10<br>11<br>12<br>13 26 1.0<br>14<br>15 16 2.0 17 1.0<br>16 18 1.0 28 1.0<br>17 29 2.0 30 1.0<br>18<br>19 28 1.0<br>20 21 2.0 22 1.0<br>21 23 1.0 27 1.0<br>22 24 2.0 36 1.0<br>23<br>24 27 1.0 39 1.0<br>25 27 1.0<br>26<br>27<br>28 29 1.0<br>29 33 1.0<br>30 31 2.0 43 1.0<br>31 32 1.0 44 1.0<br>32 33 2.0 34 1.0<br>33 35 1.0<br>34<br>35<br>36 37 2.0 40 1.0<br>37 38 1.0 45 1.0<br>38 39 2.0 41 1.0<br>39 42 1.0<br>40<br>41<br>42<br>43<br>44<br>45 | 1 2 2.0 6 1.0 25 1.0<br>2 3 1.0 8 1.0<br>3 4 2.0 9 1.0<br>4 5 1.0 45 1.0<br>5 6 2.0 10 1.0<br>6 11 1.0<br>7 8 1.0 13 2.0 25 1.0<br>8 14 1.0 19 1.0<br>9<br>10<br>11<br>12 25 1.0<br>13<br>14 15 2.0 16 1.0<br>15 17 1.0 27 1.0<br>16 28 2.0 29 1.0<br>17<br>18 27 1.0<br>19 20 2.0 21 1.0<br>20 22 1.0 26 1.0<br>21 23 2.0 35 1.0<br>22<br>23 26 1.0 38 1.0<br>24 26 1.0<br>25<br>26<br>27 28 1.0<br>28 32 1.0<br>29 30 2.0 42 1.0<br>30 31 1.0 43 1.0<br>31 32 2.0 33 1.0<br>32 34 1.0<br>33<br>34<br>35 36 2.0 39 1.0<br>36 37 1.0 44 1.0<br>37 38 2.0 40 1.0<br>38 41 1.0<br>39<br>40<br>41<br>42<br>43<br>44<br>45 | 1 2 2.0 6 1.0 25 1.0<br>2 3 1.0 8 1.0<br>3 4 2.0 9 1.0<br>4 5 1.0 45 1.0<br>5 6 2.0 10 1.0<br>6 11 1.0<br>7 8 1.0 13 2.0 25 1.0<br>8 14 1.0 19 1.0<br>9<br>10<br>11<br>12 25 1.0<br>13<br>14 15 2.0 16 1.0<br>15 17 1.0 27 1.0<br>16 28 2.0 29 1.0<br>17<br>18 27 1.0<br>19 20 2.0 21 1.0<br>20 22 1.0 26 1.0<br>21 23 2.0 35 1.0<br>22<br>23 26 1.0 38 1.0<br>24 26 1.0<br>25<br>26<br>27 28 1.0<br>28 32 1.0<br>29 30 2.0 42 1.0<br>30 31 1.0 43 1.0<br>31 32 2.0 33 1.0<br>32 34 1.0<br>33<br>34<br>35 36 2.0 39 1.0<br>36 37 1.0 44 1.0<br>37 38 2.0 40 1.0<br>38 41 1.0<br>39<br>40<br>41<br>42<br>43<br>44<br>45 | 1 2 2.0 6 1.0 24 1.0<br>2 3 1.0 8 1.0<br>3 4 2.0 9 1.0<br>4 5 1.0 10 1.0<br>5 6 2.0 11 1.0<br>6 12 1.0<br>7 8 1.0 14 2.0 24 1.0<br>8 15 1.0 19 1.0<br>9<br>10<br>11<br>12<br>13 24 1.0<br>14<br>15 16 2.0 17 1.0<br>16 18 1.0 26 1.0<br>17 27 2.0 28 1.0<br>18<br>19 20 2.0 21 1.0<br>20 22 1.0 25 1.0<br>21 23 2.0 35 1.0<br>22<br>23 25 1.0 38 1.0<br>24<br>25 44 1.0<br>26 27 1.0 45 1.0<br>27 31 1.0<br>28 29 2.0 43 1.0<br>29 30 1.0 32 1.0<br>30 31 2.0 33 1.0<br>31 34 1.0<br>32<br>33<br>34<br>35 36 2.0 39 1.0<br>36 37 1.0 40 1.0<br>37 38 2.0 41 1.0<br>38 42 1.0<br>39<br>40<br>41<br>42<br>43<br>44 46 1.0 47 1.0 48 1.0<br>45 49 1.0 50 1.0 51 1.0 |

|                         |                         |                         |                         |                         |
|-------------------------|-------------------------|-------------------------|-------------------------|-------------------------|
| 46                      |                         |                         |                         | 46                      |
| 47                      |                         |                         |                         | 47                      |
| 48                      |                         |                         |                         | 48                      |
| 49                      |                         |                         |                         | 49                      |
| 50                      |                         |                         |                         | 50                      |
| 51                      |                         |                         |                         | 51                      |
| <b>7fb</b>              | <b>7fd</b>              | <b>7ga</b>              | <b>7gc</b>              | <b>7gd</b>              |
| 1 2 2.0 6 1.0 23 1.0    | 1 2 2.0 6 1.0 23 1.0    | 1 2 2.0 6 1.0 24 1.0    | 1 2 2.0 6 1.0 23 1.0    | 1 2 2.0 6 1.0 23 1.0    |
| 2 3 1.0 8 1.0           | 2 3 1.0 8 1.0           | 2 3 1.0 8 1.0           | 2 3 1.0 8 1.0           | 2 3 1.0 8 1.0           |
| 3 4 2.0 9 1.0           | 3 4 2.0 9 1.0           | 3 4 2.0 9 1.0           | 3 4 2.0 9 1.0           | 3 4 2.0 9 1.0           |
| 4 5 1.0 43 1.0          | 4 5 1.0 51 1.0          | 4 5 1.0 10 1.0          | 4 5 1.0 51 1.0          | 4 5 1.0 49 1.0          |
| 5 6 2.0 10 1.0          | 5 6 2.0 10 1.0          | 5 6 2.0 11 1.0          | 5 6 2.0 10 1.0          | 5 6 2.0 10 1.0          |
| 6 11 1.0                | 6 11 1.0                | 6 12 1.0                | 6 11 1.0                | 6 11 1.0                |
| 7 8 1.0 13 2.0 23 1.0   | 7 8 1.0 13 2.0 23 1.0   | 7 8 1.0 14 2.0 24 1.0   | 7 8 1.0 13 2.0 23 1.0   | 7 8 1.0 13 2.0 23 1.0   |
| 8 14 1.0 18 1.0         | 8 14 1.0 18 1.0         | 8 15 1.0 19 1.0         | 8 14 1.0 18 1.0         | 8 14 1.0 18 1.0         |
| 9                       | 9                       | 9                       | 9                       | 9                       |
| 10                      | 10                      | 10                      | 10                      | 10                      |
| 11                      | 11                      | 11                      | 11                      | 11                      |
| 12 23 1.0               | 12 23 1.0               | 12                      | 12 23 1.0               | 12 23 1.0               |
| 13                      | 13                      | 13 24 1.0               | 13                      | 13                      |
| 14 15 2.0 16 1.0        | 14 15 2.0 16 1.0        | 14                      | 14 15 2.0 16 1.0        | 14 15 2.0 16 1.0        |
| 15 17 1.0 25 1.0        | 15 17 1.0 25 1.0        | 15 16 2.0 17 1.0        | 15 17 1.0 25 1.0        | 15 17 1.0 25 1.0        |
| 16 26 2.0 27 1.0        | 16 26 2.0 27 1.0        | 16 18 1.0 26 1.0        | 16 26 2.0 27 1.0        | 16 26 2.0 27 1.0        |
| 17                      | 17                      | 17 27 2.0 28 1.0        | 17                      | 17                      |
| 18 19 2.0 20 1.0        | 18 19 2.0 20 1.0        | 18                      | 18 19 2.0 20 1.0        | 18 19 2.0 20 1.0        |
| 19 21 1.0 24 1.0        | 19 21 1.0 24 1.0        | 19 20 2.0 21 1.0        | 19 21 1.0 24 1.0        | 19 21 1.0 24 1.0        |
| 20 22 2.0 34 1.0        | 20 22 2.0 34 1.0        | 20 22 1.0 25 1.0        | 20 22 2.0 33 1.0        | 20 22 2.0 33 1.0        |
| 21                      | 21                      | 21 23 2.0 34 1.0        | 21                      | 21                      |
| 22 24 1.0 37 1.0        | 22 24 1.0 37 1.0        | 22                      | 22 24 1.0 36 1.0        | 22 24 1.0 36 1.0        |
| 23                      | 23                      | 23 25 1.0 37 1.0        | 23                      | 23                      |
| 24 44 1.0               | 24 43 1.0               | 24                      | 24 41 1.0               | 24 41 1.0               |
| 25 26 1.0 45 1.0        | 25 26 1.0 44 1.0        | 25 42 1.0               | 25 26 1.0 42 1.0        | 25 26 1.0 42 1.0        |
| 26 30 1.0               | 26 30 1.0               | 26 27 1.0 43 1.0        | 26 30 1.0               | 26 30 1.0               |
| 27 28 2.0 42 1.0        | 27 28 2.0 42 1.0        | 27 31 1.0               | 27 28 2.0 40 1.0        | 27 28 2.0 40 1.0        |
| 28 29 1.0 31 1.0        | 28 29 1.0 31 1.0        | 28 29 2.0 41 1.0        | 28 29 1.0 50 1.0        | 28 29 1.0 51 1.0        |
| 29 30 2.0 32 1.0        | 29 30 2.0 32 1.0        | 29 30 1.0 51 1.0        | 29 30 2.0 31 1.0        | 29 30 2.0 31 1.0        |
| 30 33 1.0               | 30 33 1.0               | 30 31 2.0 32 1.0        | 30 32 1.0               | 30 32 1.0               |
| 31                      | 31                      | 31 33 1.0               | 31                      | 31                      |
| 32                      | 32                      | 32                      | 32                      | 32                      |
| 33                      | 33                      | 33                      | 33 34 2.0 37 1.0        | 33 34 2.0 37 1.0        |
| 34 35 2.0 38 1.0        | 34 35 2.0 38 1.0        | 34 35 2.0 38 1.0        | 34 35 1.0 49 1.0        | 34 35 1.0 50 1.0        |
| 35 36 1.0 39 1.0        | 35 36 1.0 39 1.0        | 35 36 1.0 50 1.0        | 35 36 2.0 38 1.0        | 35 36 2.0 38 1.0        |
| 36 37 2.0 40 1.0        | 36 37 2.0 40 1.0        | 36 37 2.0 39 1.0        | 36 39 1.0               | 36 39 1.0               |
| 37 41 1.0               | 37 41 1.0               | 37 40 1.0               | 37                      | 37                      |
| 38                      | 38                      | 38                      | 38                      | 38                      |
| 39                      | 39                      | 39                      | 39                      | 39                      |
| 40                      | 40                      | 40                      | 40                      | 40                      |
| 41                      | 41                      | 41                      | 41 43 1.0 44 1.0 45 1.0 | 41 43 1.0 44 1.0 45 1.0 |
| 42                      | 42                      | 42 44 1.0 45 1.0 46 1.0 | 42 46 1.0 47 1.0 48 1.0 | 42 46 1.0 47 1.0 48 1.0 |
| 43                      | 43 45 1.0 46 1.0 47 1.0 | 43 47 1.0 48 1.0 49 1.0 | 43                      | 43                      |
| 44 46 1.0 47 1.0 48 1.0 | 44 48 1.0 49 1.0 50 1.0 | 44                      | 44                      | 44                      |
| 45 49 1.0 50 1.0 51 1.0 | 45                      | 45                      | 45                      | 45                      |
| 46                      | 46                      | 46                      | 46                      | 46                      |
| 47                      | 47                      | 47                      | 47                      | 47                      |
| 48                      | 48                      | 48                      | 48                      | 48                      |
| 49                      | 49                      | 49                      | 49                      | 49                      |
| 50                      | 50                      | 50                      | 50                      | 50                      |
| 51                      | 51                      | 51                      | 51                      | 51                      |
| <b>7ai</b>              | <b>7ei</b>              | <b>7fi</b>              | <b>7aj</b>              | <b>7cj</b>              |
| 1 2 2.0 3 1.0 32 1.0    | 1 2 2.0 3 1.0 30 1.0    | 1 2 2.0 3 1.0 30 1.0    | 1 2 2.0 6 1.0 43 1.0    | 1 2 2.0 6 1.0 41 1.0    |
| 2 4 1.0 13 1.0          | 2 4 1.0 13 1.0          | 2 4 1.0 11 1.0          | 2 3 1.0 8 1.0           | 2 3 1.0 8 1.0           |
| 3 14 2.0 15 1.0         | 3 14 2.0 15 1.0         | 3 12 2.0 13 1.0         | 3 4 2.0 9 1.0           | 3 4 2.0 9 1.0           |
| 4                       | 4                       | 4                       | 4 5 1.0 10 1.0          | 4 5 1.0 10 1.0          |
| 5 13 1.0                | 5 13 1.0                | 5 6 2.0 7 1.0 30 1.0    | 5 6 2.0 11 1.0          | 5 6 2.0 11 1.0          |
| 6 7 2.0 8 1.0 32 1.0    | 6 7 2.0 8 1.0 30 1.0    | 6 8 1.0 10 1.0          | 6 44 1.0                | 6 42 1.0                |
| 7 9 1.0 12 1.0          | 7 9 1.0 12 1.0          | 7 9 2.0 20 1.0          | 7 8 1.0 12 2.0 43 1.0   | 7 8 1.0 12 2.0 41 1.0   |
| 8 10 2.0 22 1.0         | 8 10 2.0 21 1.0         | 8                       | 8 13 1.0 18 1.0         | 8 13 1.0 18 1.0         |
| 9                       | 9                       | 9 10 1.0 23 1.0         | 9                       | 9                       |
| 10 12 1.0 25 1.0        | 10 12 1.0 24 1.0        | 10 45 1.0               | 10                      | 10                      |
| 11 12 1.0               | 11 12 1.0               | 11 12 1.0 46 1.0        | 11                      | 11                      |
| 12                      | 12                      | 12 16 1.0               | 12                      | 12                      |
| 13 14 1.0               | 13 14 1.0               | 13 14 2.0 28 1.0        | 13 14 2.0 15 1.0        | 13 14 2.0 15 1.0        |
| 14 18 1.0               | 14 18 1.0               | 14 15 1.0 17 1.0        | 14 16 1.0 25 1.0        | 14 16 1.0 25 1.0        |
| 15 16 2.0 30 1.0        | 15 16 2.0 28 1.0        | 15 16 2.0 18 1.0        | 15 26 2.0 27 1.0        | 15 26 2.0 27 1.0        |
| 16 17 1.0 19 1.0        | 16 17 1.0 46 1.0        | 16 19 1.0               | 16                      | 16                      |

|                                                                                                                                                                                                                                                                                                                                                                                                                                                                                                                    |                                                                                                                                                                                                                                                                                                                                                                                                                                                                                                      |                                                                                                                                                                                                                                                                                                                                                                                                                                                                                                                    |                                                                                                                                                                                                                                                                                                                                                                                                                                                                                                                                  |                                                                                                                                                                                                                                                                                                                                                                                                                                                                                                                                            |
|--------------------------------------------------------------------------------------------------------------------------------------------------------------------------------------------------------------------------------------------------------------------------------------------------------------------------------------------------------------------------------------------------------------------------------------------------------------------------------------------------------------------|------------------------------------------------------------------------------------------------------------------------------------------------------------------------------------------------------------------------------------------------------------------------------------------------------------------------------------------------------------------------------------------------------------------------------------------------------------------------------------------------------|--------------------------------------------------------------------------------------------------------------------------------------------------------------------------------------------------------------------------------------------------------------------------------------------------------------------------------------------------------------------------------------------------------------------------------------------------------------------------------------------------------------------|----------------------------------------------------------------------------------------------------------------------------------------------------------------------------------------------------------------------------------------------------------------------------------------------------------------------------------------------------------------------------------------------------------------------------------------------------------------------------------------------------------------------------------|--------------------------------------------------------------------------------------------------------------------------------------------------------------------------------------------------------------------------------------------------------------------------------------------------------------------------------------------------------------------------------------------------------------------------------------------------------------------------------------------------------------------------------------------|
| 17 18 2.0 20 1.0<br>18 21 1.0<br>19<br>20<br>21<br>22 23 2.0 26 1.0<br>23 24 1.0 27 1.0<br>24 25 2.0 28 1.0<br>25 29 1.0<br>26<br>27<br>28<br>29<br>30<br>31 32 1.0 36 1.0 37 1.0<br>46 1.0<br>32 33 1.0<br>33 34 1.0 38 1.0 42 1.0<br>34 35 1.0 39 1.0 43 1.0<br>35 36 1.0 40 1.0 44 1.0<br>36 41 1.0 45 1.0<br>37<br>38<br>39<br>40<br>41<br>42<br>43<br>44<br>45<br>46                                                                                                                                          | 17 18 2.0 19 1.0<br>18 20 1.0<br>19<br>20<br>21 22 2.0 25 1.0<br>22 23 1.0 45 1.0<br>23 24 2.0 26 1.0<br>24 27 1.0<br>25<br>26<br>27<br>28<br>29 30 1.0 34 1.0 35 1.0<br>44 1.0<br>30 31 1.0<br>31 32 1.0 36 1.0 40 1.0<br>32 33 1.0 37 1.0 41 1.0<br>33 34 1.0 38 1.0 42 1.0<br>34 39 1.0 43 1.0<br>35<br>36<br>37<br>38<br>39<br>40<br>41<br>42<br>43<br>44<br>45<br>46                                                                                                                            | 17<br>18<br>19<br>20 21 2.0 24 1.0<br>21 22 1.0 25 1.0<br>22 23 2.0 26 1.0<br>23 27 1.0<br>24<br>25<br>26<br>27<br>28<br>29 30 1.0 34 1.0 35 1.0<br>44 1.0<br>30 31 1.0<br>31 32 1.0 36 1.0 40 1.0<br>32 33 1.0 37 1.0 41 1.0<br>33 34 1.0 38 1.0 42 1.0<br>34 39 1.0 43 1.0<br>35<br>36<br>37<br>38<br>39<br>40<br>41<br>42<br>43<br>44<br>45 47 1.0 48 1.0 49 1.0<br>46 50 1.0 51 1.0 52 1.0<br>47<br>48<br>49<br>50<br>51<br>52                                                                                 | 17 25 1.0<br>18 19 2.0 20 1.0<br>19 21 1.0 24 1.0<br>20 22 2.0 34 1.0<br>21<br>22 24 1.0 37 1.0<br>23 24 1.0<br>24<br>25 26 1.0<br>26 30 1.0<br>27 28 2.0 42 1.0<br>28 29 1.0 31 1.0<br>29 30 2.0 32 1.0<br>30 33 1.0<br>31<br>32<br>33<br>34 35 2.0 38 1.0<br>35 36 1.0 39 1.0<br>36 37 2.0 40 1.0<br>37 41 1.0<br>38<br>39<br>40<br>41<br>42<br>43 46 2.0<br>44 45 2.0 47 1.0<br>45 46 1.0 48 1.0<br>46 49 1.0<br>47<br>48<br>49                                                                                               | 17 25 1.0<br>18 19 2.0 20 1.0<br>19 21 1.0 24 1.0<br>20 22 2.0 33 1.0<br>21<br>22 24 1.0 36 1.0<br>23 24 1.0<br>24<br>25 26 1.0<br>26 30 1.0<br>27 28 2.0 40 1.0<br>28 29 1.0 49 1.0<br>29 30 2.0 31 1.0<br>30 32 1.0<br>31<br>32<br>33 34 2.0 37 1.0<br>34 35 1.0 48 1.0<br>35 36 2.0 38 1.0<br>36 39 1.0<br>37<br>38<br>39<br>40<br>41 44 2.0<br>42 43 2.0 45 1.0<br>43 44 1.0 46 1.0<br>44 47 1.0<br>45<br>46<br>47<br>48 50 1.0<br>49 51 1.0<br>50 52 1.0 53 1.0 54 1.0<br>51 55 1.0 56 1.0 57 1.0<br>52<br>53<br>54<br>55<br>56<br>57 |
| <b>7dj</b>                                                                                                                                                                                                                                                                                                                                                                                                                                                                                                         | <b>7ej</b>                                                                                                                                                                                                                                                                                                                                                                                                                                                                                           | <b>7fj</b>                                                                                                                                                                                                                                                                                                                                                                                                                                                                                                         | <b>7gj</b>                                                                                                                                                                                                                                                                                                                                                                                                                                                                                                                       |                                                                                                                                                                                                                                                                                                                                                                                                                                                                                                                                            |
| 1 2 2.0 6 1.0 41 1.0<br>2 3 1.0 8 1.0<br>3 4 2.0 9 1.0<br>4 5 1.0 10 1.0<br>5 6 2.0 11 1.0<br>6 42 1.0<br>7 8 1.0 12 2.0 41 1.0<br>8 13 1.0 17 1.0<br>9<br>10<br>11<br>12<br>13 14 2.0 15 1.0<br>14 23 1.0 49 1.0<br>15 24 2.0 25 1.0<br>16 23 1.0<br>17 18 2.0 19 1.0<br>18 22 1.0 48 1.0<br>19 20 2.0 32 1.0<br>20 22 1.0 35 1.0<br>21 22 1.0<br>22<br>23 24 1.0<br>24 28 1.0<br>25 26 2.0 40 1.0<br>26 27 1.0 29 1.0<br>27 28 2.0 30 1.0<br>28 31 1.0<br>29<br>30<br>31<br>32 33 2.0 36 1.0<br>33 34 1.0 37 1.0 | 1 2 2.0 6 1.0 41 1.0<br>2 3 1.0 8 1.0<br>3 4 2.0 9 1.0<br>4 5 1.0 10 1.0<br>5 6 2.0 11 1.0<br>6 42 1.0<br>7 8 1.0 12 2.0 41 1.0<br>8 13 1.0 18 1.0<br>9<br>10<br>11<br>12<br>13 14 2.0 15 1.0<br>14 16 1.0 25 1.0<br>15 26 2.0 27 1.0<br>16<br>17 25 1.0<br>18 19 2.0 20 1.0<br>19 21 1.0 24 1.0<br>20 22 2.0 33 1.0<br>21<br>22 24 1.0 36 1.0<br>23 24 1.0<br>24<br>25 26 1.0<br>26 30 1.0<br>27 28 2.0 40 1.0<br>28 29 1.0 48 1.0<br>29 30 2.0 31 1.0<br>30 32 1.0<br>31<br>32<br>33 34 2.0 37 1.0 | 1 2 2.0 6 1.0 41 1.0<br>2 3 1.0 8 1.0<br>3 4 2.0 9 1.0<br>4 5 1.0 10 1.0<br>5 6 2.0 11 1.0<br>6 42 1.0<br>7 8 1.0 12 2.0 41 1.0<br>8 13 1.0 17 1.0<br>9<br>10<br>11<br>12<br>13 14 2.0 15 1.0<br>14 16 1.0 23 1.0<br>15 24 2.0 25 1.0<br>16<br>17 18 2.0 19 1.0<br>18 20 1.0 22 1.0<br>19 21 2.0 32 1.0<br>20<br>21 22 1.0 35 1.0<br>22 48 1.0<br>23 24 1.0 49 1.0<br>24 28 1.0<br>25 26 2.0 40 1.0<br>26 27 1.0 29 1.0<br>27 28 2.0 30 1.0<br>28 31 1.0<br>29<br>30<br>31<br>32 33 2.0 36 1.0<br>33 34 1.0 37 1.0 | 1 2 2.0 6 1.0 39 1.0<br>2 3 1.0 8 1.0<br>3 4 2.0 9 1.0<br>4 5 1.0 10 1.0<br>5 6 2.0 11 1.0<br>6 40 1.0<br>7 8 1.0 12 2.0 39 1.0<br>8 13 1.0 17 1.0<br>9<br>10<br>11<br>12<br>13 14 2.0 15 1.0<br>14 16 1.0 23 1.0<br>15 24 2.0 25 1.0<br>16<br>17 18 2.0 19 1.0<br>18 20 1.0 22 1.0<br>19 21 2.0 31 1.0<br>20<br>21 22 1.0 34 1.0<br>22 46 1.0<br>23 24 1.0 47 1.0<br>24 28 1.0<br>25 26 2.0 38 1.0<br>26 27 1.0 55 1.0<br>27 28 2.0 29 1.0<br>28 30 1.0<br>29<br>30<br>31 32 2.0 35 1.0<br>32 33 1.0 54 1.0<br>33 34 2.0 36 1.0 |                                                                                                                                                                                                                                                                                                                                                                                                                                                                                                                                            |

|                                                                                                                                                                                                                                                                                                                                                                                                                                                                                                                                                                                                                                                                                                                                                                                                       |                                                                                                                                                                                                                                                                                                                                                                                                                                                                                                                                                                                                                                                                                                                                                                                                           |                                                                                                                                                                                                                                                                                                                                                                                                                                                                                                                                                                                                                                                                                                                                                                                                           |                                                                                                                                                                                                                             |  |
|-------------------------------------------------------------------------------------------------------------------------------------------------------------------------------------------------------------------------------------------------------------------------------------------------------------------------------------------------------------------------------------------------------------------------------------------------------------------------------------------------------------------------------------------------------------------------------------------------------------------------------------------------------------------------------------------------------------------------------------------------------------------------------------------------------|-----------------------------------------------------------------------------------------------------------------------------------------------------------------------------------------------------------------------------------------------------------------------------------------------------------------------------------------------------------------------------------------------------------------------------------------------------------------------------------------------------------------------------------------------------------------------------------------------------------------------------------------------------------------------------------------------------------------------------------------------------------------------------------------------------------|-----------------------------------------------------------------------------------------------------------------------------------------------------------------------------------------------------------------------------------------------------------------------------------------------------------------------------------------------------------------------------------------------------------------------------------------------------------------------------------------------------------------------------------------------------------------------------------------------------------------------------------------------------------------------------------------------------------------------------------------------------------------------------------------------------------|-----------------------------------------------------------------------------------------------------------------------------------------------------------------------------------------------------------------------------|--|
| 34 35 2.0 38 1.0<br>35 39 1.0<br>36<br>37<br>38<br>39<br>40<br>41 44 2.0<br>42 43 2.0 45 1.0<br>43 44 1.0 46 1.0<br>44 47 1.0<br>45<br>46<br>47<br>48 50 1.0 51 1.0 52 1.0<br>49 53 1.0 54 1.0 55 1.0<br>50<br>51<br>52<br>53<br>54<br>55                                                                                                                                                                                                                                                                                                                                                                                                                                                                                                                                                             | 34 35 1.0 49 1.0<br>35 36 2.0 38 1.0<br>36 39 1.0<br>37<br>38<br>39<br>40<br>41 44 2.0<br>42 43 2.0 45 1.0<br>43 44 1.0 46 1.0<br>44 47 1.0<br>45<br>46<br>47<br>48<br>49                                                                                                                                                                                                                                                                                                                                                                                                                                                                                                                                                                                                                                 | 34 35 2.0 38 1.0<br>35 39 1.0<br>36<br>37<br>38<br>39<br>40<br>41 44 2.0<br>42 43 2.0 45 1.0<br>43 44 1.0 46 1.0<br>44 47 1.0<br>45<br>46<br>47<br>48 50 1.0 51 1.0 52 1.0<br>49 53 1.0 54 1.0 55 1.0<br>50<br>51<br>52<br>53<br>54<br>55                                                                                                                                                                                                                                                                                                                                                                                                                                                                                                                                                                 | 34 37 1.0<br>35<br>36<br>37<br>38<br>39 42 2.0<br>40 41 2.0 43 1.0<br>41 42 1.0 44 1.0<br>42 45 1.0<br>43<br>44<br>45<br>46 48 1.0 49 1.0 50 1.0<br>47 51 1.0 52 1.0 53 1.0<br>48<br>49<br>50<br>51<br>52<br>53<br>54<br>55 |  |
| <b>10aa</b>                                                                                                                                                                                                                                                                                                                                                                                                                                                                                                                                                                                                                                                                                                                                                                                           | <b>10ab</b>                                                                                                                                                                                                                                                                                                                                                                                                                                                                                                                                                                                                                                                                                                                                                                                               | <b>10ad</b>                                                                                                                                                                                                                                                                                                                                                                                                                                                                                                                                                                                                                                                                                                                                                                                               |                                                                                                                                                                                                                             |  |
| 1 2 2.0 6 1.0 25 1.0<br>2 3 1.0 8 1.0<br>3 4 2.0 9 1.0<br>4 5 1.0 10 1.0<br>5 6 2.0 11 1.0<br>6 12 1.0<br>7 8 1.0 13 2.0 25 1.0<br>8 14 1.0 19 1.0<br>9<br>10<br>11<br>12<br>13<br>14 15 2.0 16 1.0<br>15 17 1.0 27 1.0<br>16 28 2.0 29 1.0<br>17<br>18 27 1.0<br>19 20 2.0 21 1.0<br>20 22 1.0 26 1.0<br>21 23 2.0 36 1.0<br>22<br>23 26 1.0 39 1.0<br>24 26 1.0<br>25 45 1.0<br>26<br>27 28 1.0<br>28 32 1.0<br>29 30 2.0 44 1.0<br>30 31 1.0 33 1.0<br>31 32 2.0 34 1.0<br>32 35 1.0<br>33<br>34<br>35<br>36 37 2.0 40 1.0<br>37 38 1.0 41 1.0<br>38 39 2.0 42 1.0<br>39 43 1.0<br>40<br>41<br>42<br>43<br>44<br>45 46 1.0 52 1.0 53 1.0<br>46 47 1.0 54 1.0 55 1.0<br>47 56 1.0 57 1.0 58 1.0<br>48 49 1.0 58 1.0 59 2.0<br>49 50 1.0 60 1.0 65 1.0<br>50 51 2.0 69 1.0<br>51 58 1.0 72 1.0<br>52 | 1 2 2.0 6 1.0 25 1.0<br>2 3 1.0 8 1.0<br>3 4 2.0 9 1.0<br>4 5 1.0 10 1.0<br>5 6 2.0 11 1.0<br>6 12 1.0<br>7 8 1.0 13 2.0 25 1.0<br>8 14 1.0 19 1.0<br>9<br>10<br>11<br>12<br>13<br>14 15 2.0 16 1.0<br>15 17 1.0 27 1.0<br>16 28 2.0 29 1.0<br>17<br>18 27 1.0<br>19 20 2.0 21 1.0<br>20 22 1.0 26 1.0<br>21 23 2.0 36 1.0<br>22<br>23 26 1.0 39 1.0<br>24 26 1.0<br>25 45 1.0<br>26<br>27 28 1.0<br>28 32 1.0<br>29 30 2.0 44 1.0<br>30 31 1.0 33 1.0<br>31 32 2.0 34 1.0<br>32 35 1.0<br>33<br>34<br>35<br>36 37 2.0 40 1.0<br>37 38 1.0 41 1.0<br>38 39 2.0 42 1.0<br>39 43 1.0<br>40<br>41<br>42<br>43<br>44<br>45 46 1.0 52 1.0 53 1.0<br>46 54 1.0 55 1.0 98 1.0<br>47 56 1.0 57 1.0 58 1.0<br>98 1.0<br>48 49 1.0 58 1.0 59 2.0<br>49 50 1.0 60 1.0 65 1.0<br>50 51 2.0 69 1.0<br>51 58 1.0 72 1.0 | 1 2 2.0 6 1.0 25 1.0<br>2 3 1.0 8 1.0<br>3 4 2.0 9 1.0<br>4 5 1.0 10 1.0<br>5 6 2.0 11 1.0<br>6 12 1.0<br>7 8 1.0 13 2.0 25 1.0<br>8 14 1.0 19 1.0<br>9<br>10<br>11<br>12<br>13<br>14 15 2.0 16 1.0<br>15 17 1.0 27 1.0<br>16 28 2.0 29 1.0<br>17<br>18 27 1.0<br>19 20 2.0 21 1.0<br>20 22 1.0 26 1.0<br>21 23 2.0 36 1.0<br>22<br>23 26 1.0 39 1.0<br>24 26 1.0<br>25 45 1.0<br>26<br>27 28 1.0<br>28 32 1.0<br>29 30 2.0 44 1.0<br>30 31 1.0 33 1.0<br>31 32 2.0 34 1.0<br>32 35 1.0<br>33<br>34<br>35<br>36 37 2.0 40 1.0<br>37 38 1.0 41 1.0<br>38 39 2.0 42 1.0<br>39 43 1.0<br>40<br>41<br>42<br>43<br>44<br>45 46 1.0 52 1.0 53 1.0<br>46 54 1.0 55 1.0 98 1.0<br>47 56 1.0 57 1.0 58 1.0<br>99 1.0<br>48 49 1.0 58 1.0 59 2.0<br>49 50 1.0 60 1.0 65 1.0<br>50 51 2.0 69 1.0<br>51 58 1.0 72 1.0 |                                                                                                                                                                                                                             |  |

|                  |                   |                        |  |  |
|------------------|-------------------|------------------------|--|--|
| 53               | 52                | 52                     |  |  |
| 54               | 53                | 53                     |  |  |
| 55               | 54                | 54                     |  |  |
| 56               | 55                | 55                     |  |  |
| 57               | 56                | 56                     |  |  |
| 58               | 57                | 57                     |  |  |
| 59               | 58                | 58                     |  |  |
| 60 61 2.0 62 1.0 | 59                | 59                     |  |  |
| 61 77 1.0 86 1.0 | 60 61 2.0 62 1.0  | 60 61 2.0 62 1.0       |  |  |
| 62 63 2.0 78 1.0 | 61 77 1.0 86 1.0  | 61 77 1.0 86 1.0       |  |  |
| 63 77 1.0 79 1.0 | 62 63 2.0 78 1.0  | 62 63 2.0 78 1.0       |  |  |
| 64 77 1.0        | 63 77 1.0 79 1.0  | 63 77 1.0 79 1.0       |  |  |
| 65 66 1.0 67 2.0 | 64 77 1.0         | 64 77 1.0              |  |  |
| 66 68 2.0 91 1.0 | 65 66 1.0 67 2.0  | 65 66 1.0 67 2.0       |  |  |
| 67 87 1.0 89 1.0 | 66 68 2.0 91 1.0  | 66 68 2.0 91 1.0       |  |  |
| 68 87 1.0 90 1.0 | 67 87 1.0 89 1.0  | 67 87 1.0 89 1.0       |  |  |
| 69 70 2.0 76 1.0 | 68 87 1.0 90 1.0  | 68 87 1.0 90 1.0       |  |  |
| 70 71 1.0 75 1.0 | 69 70 2.0 76 1.0  | 69 70 2.0 76 1.0       |  |  |
| 71 72 2.0 74 1.0 | 70 71 1.0 75 1.0  | 70 71 1.0 75 1.0       |  |  |
| 72 73 1.0        | 71 72 2.0 74 1.0  | 71 72 2.0 74 1.0       |  |  |
| 73               | 72 73 1.0         | 72 73 1.0              |  |  |
| 74               | 73                | 73                     |  |  |
| 75               | 74                | 74                     |  |  |
| 76               | 75                | 75                     |  |  |
| 77               | 76                | 76                     |  |  |
| 78 80 2.0 82 1.0 | 77                | 77                     |  |  |
| 79 81 2.0 85 1.0 | 78 80 2.0 82 1.0  | 78 80 2.0 82 1.0       |  |  |
| 80 81 1.0 83 1.0 | 79 81 2.0 85 1.0  | 79 81 2.0 85 1.0       |  |  |
| 81 84 1.0        | 80 81 1.0 83 1.0  | 80 81 1.0 83 1.0       |  |  |
| 82               | 81 84 1.0         | 81 84 1.0              |  |  |
| 83               | 82                | 82                     |  |  |
| 84               | 83                | 83                     |  |  |
| 85               | 84                | 84                     |  |  |
| 86               | 85                | 85                     |  |  |
| 87 88 1.0        | 86                | 86                     |  |  |
| 88               | 87 88 1.0         | 87 88 1.0              |  |  |
| 89               | 88                | 88                     |  |  |
| 90 93 2.0 96 1.0 | 89                | 89                     |  |  |
| 91 92 2.0 94 1.0 | 90 93 2.0 96 1.0  | 90 93 2.0 96 1.0       |  |  |
| 92 93 1.0 97 1.0 | 91 92 2.0 94 1.0  | 91 92 2.0 94 1.0       |  |  |
| 93 95 1.0        | 92 93 1.0 97 1.0  | 92 93 1.0 97 1.0       |  |  |
| 94               | 93 95 1.0         | 93 95 1.0              |  |  |
| 95               | 94                | 94                     |  |  |
| 96               | 95                | 95                     |  |  |
| 97               | 96                | 96                     |  |  |
|                  | 97                | 97                     |  |  |
|                  | 98 99 1.0 100 1.0 | 98 100 1.0 101 1.0 104 |  |  |
|                  | 99                | 1.0                    |  |  |
|                  | 100               | 99 102 1.0 103 1.0 104 |  |  |
|                  |                   | 1.0                    |  |  |
|                  |                   | 100                    |  |  |
|                  |                   | 101                    |  |  |
|                  |                   | 102                    |  |  |
|                  |                   | 103                    |  |  |
|                  |                   | 104 105 1.0 106 1.0    |  |  |
|                  |                   | 105                    |  |  |
|                  |                   | 106                    |  |  |

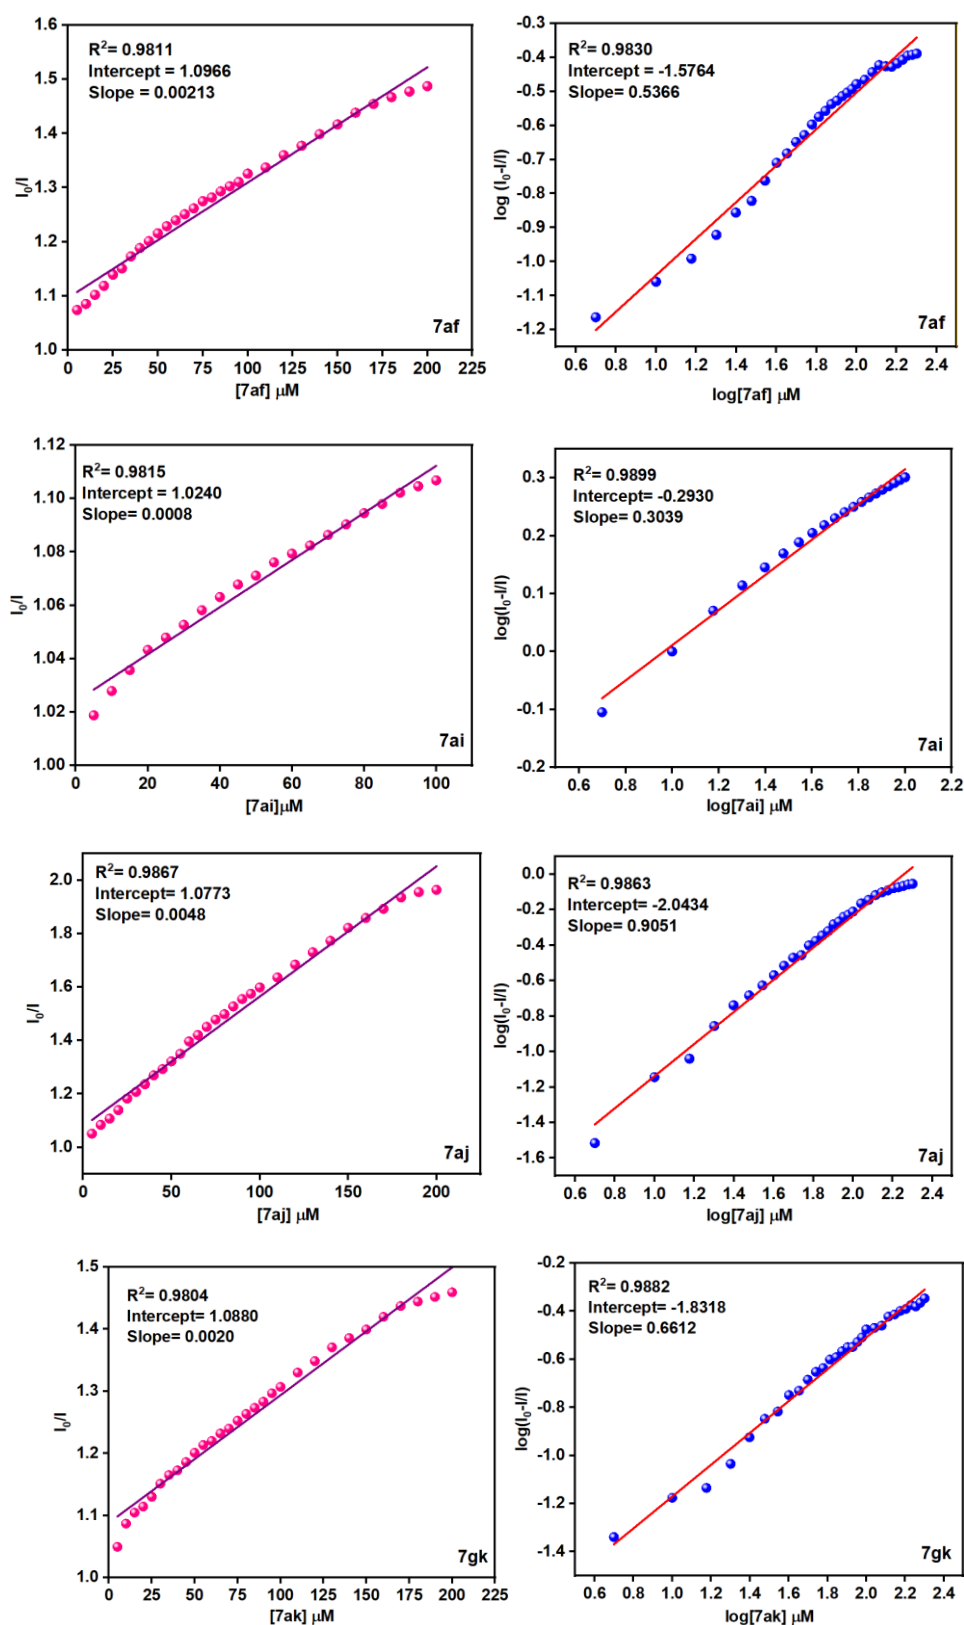

**Fig. S119** Plot of  $I_0/I$  vs. concentrations of compounds; Scatchard plot of  $\log([I_0-I]/I)$  vs.  $\log$  [compound] for BSA in the presence of selected ligands.

## References

- 1 S. D. Pasuparthi and B. Maiti, Facile synthesis of bis(indol-3-yl)methane derivatives catalyzed by carboxylic acid functionalized ionic liquid at room temperature: Investigation of photophysical properties, DFT calculations and molecular docking with bovine serum albumin, *Tetrahedron*, 2024, **153**, 133845.
- 2 P. Madivalappa Davanagere and B. Maiti, 1,3-Bis(carboxymethyl)imidazolium chloride as a sustainable, recyclable, and metal-free ionic catalyst for the biginelli multicomponent reaction in neat condition, *ACS Omega*, 2021, **6**, 26035–26047.
- 3 M. J. Frisch, G. W. Trucks, H. B. Schlegel, G. E. Scuseria, M. A. Robb, J. R. Cheeseman, G. Scalmani, V. Barone, G. A. Petersson, H. Nakatsuji, X. Li, M. Caricato, A. V. Marenich, J. Bloino, B. G. Janesko, R. Gomperts, B. Mennucci, H. P. Hratchian, J. V. Ortiz, A. F. Izmaylov, J. L. Sonnenberg, D. Williams-Young, F. Ding, F. Lipparini, F. Egidi, J. Goings, B. Peng, A. Petrone, T. Henderson, D. Ranasinghe, V. G. Zakrzewski, J. Gao, N. Rega, G. Zheng, W. Liang, M. Hada, M. Ehara, K. Toyota, R. Fukuda, J. Hasegawa, M. Ishida, T. Nakajima, Y. Honda, O. Kitao, H. Nakai, T. Vreven, K. Throssell, J. A. Montgomery, Jr., J. E. Peralta, F. Ogliaro, M. J. Bearpark, J. J. Heyd, E. N. Brothers, K. N. Kudin, V. N. Staroverov, T. A. Keith, R. Kobayashi, J. Normand, K. Raghavachari, A. P. Rendell, J. C. Burant, S. S. Iyengar, J. Tomasi, M. Cossi, J. M. Millam, M. Klene, C. Adamo, R. Cammi, J. W. Ochterski, R. L. Martin, K. Morokuma, O. Farkas, J. B. Foresman and D. J. Fox, Gaussian 16, Revision C. 01, Gaussian, Inc., Wallingford CT, 2019.
- 4 a) C. Lee, W. Yang and R.G. Parr, Development of the Colle-Salvetti correlation-energy formula into a functional of the electron density, *Phys. Rev. B: Condens. Matter Mater. Phys.*, 1988, **37**, 785–789.; b) R.G. Parr and Y. Weitao, *Density-Functional Theory of atoms and molecules*, Oxford University Press, Oxford, 1994; c) R.L. Martin, Natural transition orbitals, *J. Chem. Phys.*, 2003, **118**, 4775–4777.
- 5 a) R. Ditchfield, W.J. Hehre and J.A. Pople, Self-consistent molecular-orbital methods. IX. An extended gaussian-type basis for molecular-orbital studies of organic molecules, *J. Chem. Phys.*, 1971, **54**, 724–728. b) W.J. Hehre, R. Ditchfield and J.A. Pople, Self-consistent molecular orbital methods. XII. Further extensions of gaussian-type basis sets for use in molecular orbital studies of organic molecules, *J. Chem. Phys.*, 1972, **56**, 2257–2261. c) A. D. Becke, Density-functional thermochemistry. III. The role of exact exchange, *J. Chem. Phys.*, 1993, **98**, 5648–5652.

- 6 R. Dennington, T.A. Keith, J.M. Millam, GaussView, version 6.1, Semichem Inc., Shawnee Mission. KS, 2016.
- 7 O. Trott and A. J. Olson, AutoDock Vina: improving the speed and accuracy of docking with a new scoring function, efficient optimization, and multithreading, *J. Comput. Chem.*, 2010, **31**, 455–461.
- 8 A. Bujacz, Structures of bovine, equine and leporine serum albumin, *Acta Crystallogr., Sect. D: Biol. Crystallogr.*, 2012, **68**, 1278–1289.
- 9 P. W. Rose, A. Prlic, C. Bi, W. F. Bluhm, C. H. Christie, S. Dutta, R. K. Green, D. S. Goodsell, J. D. Westbrook, J. Woo, J. Young, C. Zardecki, H. M. Berman, P. E. Bourne and S. K. Burley, The RCSB Protein Data Bank: views of structural biology for basic and applied research and education, *Nucleic Acids Res.*, 2015, **43**, D345–D356.
- 10 S. Yadav, S. K. Pandey, V. K. Singh, Y. Goel, A. Kumar and S. M. Singh, Molecular docking studies of 3-bromopyruvate and its derivatives to metabolic regulatory enzymes: Implication in designing of novel anticancer therapeutic strategies, *PLoS ONE*, 2017, **12**, e0176403.
- 11 H. R. Drew, R. M. Wing, T. Takano, C. Broka, S. Tanaka, K. Itakura and R. E. Dickerson, Structure of a B-DNA dodecamer: conformation and dynamics, *Proc. Natl. Acad. Sci. U. S. A.*, 1981, **78**, 2179–2183.
- 12 S. De, R. S. Kumar, A. Gauthaman, S. A. Kumar, P. Paira, A. Moorthy, and S. Banerjee, Luminescent ruthenium(II)-para-cymene complexes of aryl substituted imidazo-1,10-phenanthroline as anticancer agents and the effect of remote substituents on cytotoxic activities, *Inorganica Chim. Acta*, 2021, **515**, 120066.
- 13 S. De, and S.A. Kumar, Highly selective and potent anti-cancer agents based on 2,9-substituted-1, 10-phenanthroline derivatives, *Inorg. Chem. Commun.*, 2020, **119**, 108085.
- 14 R. K. Sharma and C. Sharma, A highly efficient synthesis of oxindoles using a functionalized silica gel as support for indium(III) acetylacetonate catalyst in an aqueous-acetonitrile medium, *J. Mol. Catal. A Chem.*, 2010, **332**, 53–58.
- 15 J. Azizian, A. A. Mohammadi, A. R. Karimi and M. R. Mohammadizadeh, KAl(SO<sub>4</sub>)<sub>2</sub>·12H<sub>2</sub>O as a recyclable Lewis acid catalyst for synthesis of some new oxindoles in aqueous media, *J. Chem. Res.*, 2004, **6**, 424–426.
- 16 G. Brahmachari and B. Banerjee, Facile and one-pot access of 3,3-bis(indol-3-yl)indolin-2-ones and 2,2-bis(indol-3-yl)acenaphthylen-1(2H)-one derivatives via an ecoFriendly pseudo-multicomponent reaction at room temperature using sulfamic acid

- as an organo-catalyst, *ACS Sustainable Chem. Eng.*, 2014, **2**, 2802–2812.
- 17 R.-P. Li, Z.-L. Wang, Y.-H. Zhang, Z.-Y. Tan and D.-Z. Xu, Iodine-catalyzed oxidative coupling of indolin-2-ones with indoles: Synthesis of 3,3-disubstituted oxindole compounds, *ChemistrySelect*, 2022, **7**, e202200558.
  - 18 M. Shahabi, M. Tabatabaee and M. Keshavarz, A novel superparamagnetic heterogeneous organocatalyst for the efficient synthesis of 3,3'-diaryloxindoles, *Curr. Organocatalysis*, 2018, **5**, 25–33.
  - 19 J. Azizian, A. A. Mohammadi, N. Karimi, M. R. Mohammadizadeh and A. R. Karimi, Silica sulfuric acid a novel and heterogeneous catalyst for the synthesis of some new oxindole derivatives, *Catal. Commun.*, 2006, **7**, 752–755.
  - 20 X. Yuan, S. Wang, J. Cheng, B. Yu and H. M. Liu, HFIP-promoted catalyst-free cascade reactions for the synthesis of biologically relevant 3,3-di(indolyl)indolin-2-ones from indoles and isatins, *Chinese Chem. Lett.*, 2020, **31**, 2465–2468.
  - 21 K. X. Wu, Y. Z. Xu, L. Cheng, R. S. Wu, P. Z. Liu and D. Z. Xu, Iron-catalyzed oxidative bis-arylation of indolin-2-ones for direct construction of quaternary carbons, *Green Chem.*, 2021, **23**, 8448–8452.
  - 22 B. Swain, P. Singh, A. Angeli, S. K. Sahoo, V. M. Yaddanapudi, C. T. Supuran and M. Arifuddin, Efficient one-pot synthesis of 3,3-di(indolyl)indolin-2-ones from isatin and indole catalyzed by VOSO<sub>4</sub> as non-sulfonamide carbonic anhydrase inhibitors, *Anticancer. Agents Med. Chem.*, 2022, **22**, 2358–2366.
  - 23 S. Singh, A. Kumar, L. Nebhani and C. K. Hazra, Sustainable sulfonic acid functionalized tubular shape mesoporous silica as a heterogeneous catalyst for selective unsymmetrical Friedel-Crafts alkylation in one pot, *JACS Au*, 2023, **3**, 3400–3411.
  - 24 L. Z. Fekri and M. Nikpassand, 1,4-Diazabicyclo[2.2.2]octanium diacetate under grinding: Efficient and eco-Friendly process for the synthesis of symmetric, unsymmetric and new bis di(indolyl)indolin-2-one, *Lett. Org. Chem.*, 2017, **14**, 494–502.
  - 25 S. Kumar, S. K. Rastogi, A. Singh, M. Bharati Ahirwar, M. M. Deshmukh, A. K. Sinha and R. Kumar, Friedel-crafts-type reaction of (het)arenes with aldehydes/ketones under acid-free conditions using neutral ionic liquid: A convenient routes to bis(indolyl)methanes and beyond, *Asian J. Org. Chem.*, 2022, **11**, e202100749.
  - 26 A. Allahresani, B. Taheri and M. A. Nasser, Fe(III) @g-C<sub>3</sub>N<sub>4</sub> nanocomposite-catalyzed green synthesis of di-indolyloxindole derivatives, *Res. Chem. Intermed.*, 2018, **44**, 6741–6751.

- 27 E. M. Galathri, T. J. Kuczmera, B. J. Nachtsheim and C. G. Kokotos, Organocatalytic Friedel-Crafts arylation of aldehydes with indoles utilizing N-heterocyclic iod(az)olium salts as halogen-bonding catalysts, *Green Chem.*, 2023, **26**, 825–831.
- 28 H. Kilic, S. Bayindir, E. Erdogan, S. Agopcan Cinar, F. A. S. Konuklar, S. K. Bali, N. Saracoglu and V. Aviyente, Aviyente, Bismuth nitrate-promoted disproportionative condensation of indoles with cyclohexanone: A new-type azafulvenium reactivity of indole, *New J. Chem.*, 2017, **41**, 9674–9687.
- 29 G. L. Feng, An efficient synthesis of 2,2-bis(1H-indol-3-yl)-2H-acenaphthen-1-one catalyzed by recyclable solid superacid  $\text{SO}_4^{2-}/\text{TiO}_2$  under grinding condition, *Chinese Chem. Lett.*, 2010, **21**, 1057–1061.
